# Supplementary material for: Pol III Promoters to Express Small RNAs: Delineation of Transcription Initiation
Source: PubMed Central journal article supplement — Mol Ther Nucleic Acids. 2014 May 6;3(5):e161–. doi: 10.1038/mtna.2014.12 (PMC4040628; doi:10.1038/mtna.2014.12), 2014-05-06
Supplement: mtna201412x6.pdf [file mtna201412x6.pdf]

**Table S1**

**#Pri-miR-30/NCCR5**

|                                                                     | Reads  |
|---------------------------------------------------------------------|--------|
| CGACGGUGUAAACUGAGCUUGCUCGCGUGAAGCCACAGAUGGCGAGCAAGCUCCGUUUACACGGCUG |        |
| .GACGGUGUAAACUGAGCUUGC.....                                         | 4      |
| .GACGGUGUAAACUGAGCUUGCUCG.....                                      | 7      |
| ..ACGGUGUAAACUGAGCUUGC.....                                         | 3      |
| ..ACGGUGUAAACUGAGCUUGCUC.....                                       | 3      |
| ..ACGGUGUAAACUGAGCUUGCUCG.....                                      | 58     |
| ..ACGGUGUAAACUGAGCUUGCUCG.....                                      | 27     |
| ...CGGUGUAAACUGAGCUUGC.....                                         | 2      |
| ...CGGUGUAAACUGAGCUUGCUC.....                                       | 2      |
| ...CGGUGUAAACUGAGCUUGCUCG.....                                      | 38     |
| ...CGGUGUAAACUGAGCUUGCUCG.....                                      | 20     |
| ....GGUGUAAACUGAGCU.....                                            | 2      |
| ....GGUGUAAACUGAGCUU.....                                           | 3      |
| ....GGUGUAAACUGAGCUUG.....                                          | 9      |
| ....GGUGUAAACUGAGCUUGC.....                                         | 1471   |
| ....GGUGUAAACUGAGCUUGC.....                                         | 234    |
| ....GGUGUAAACUGAGCUUGCUC.....                                       | 372    |
| ....GGUGUAAACUGAGCUUGCUCG.....                                      | 19317  |
| ....GGUGUAAACUGAGCUUGCUCG.....                                      | 158788 |
| ....GGUGUAAACUGAGCUUGCUCGCG.....                                    | 576    |
| ....GGUGUAAACUGAGCUUGCUCGCGU.....                                   | 519    |
| .....GUGUAAACUGAGCUUGC.....                                         | 10     |
| .....GUGUAAACUGAGCUUGC.....                                         | 2      |
| .....GUGUAAACUGAGCUUGCUC.....                                       | 2      |
| .....GUGUAAACUGAGCUUGCUCG.....                                      | 157    |
| .....GUGUAAACUGAGCUUGCUCG.....                                      | 2063   |
| .....GUGUAAACUGAGCUUGCUCGCG.....                                    | 11     |
| .....GUGUAAACUGAGCUUGCUCGCGU.....                                   | 15     |
| .....UGUAAACUGAGCUUGC.....                                          | 12     |
| .....UGUAAACUGAGCUUGCUC.....                                        | 5      |
| .....UGUAAACUGAGCUUGCUCG.....                                       | 153    |
| .....UGUAAACUGAGCUUGCUCG.....                                       | 1687   |
| .....UGUAAACUGAGCUUGCUCGCG.....                                     | 9      |
| .....UGUAAACUGAGCUUGCUCGCGU.....                                    | 11     |
| .....GUAAACUGAGCUUGCUC.....                                         | 3      |
| .....GUAAACUGAGCUUGCUCG.....                                        | 229    |
| .....GUAAACUGAGCUUGCUCG.....                                        | 2477   |
| .....GUAAACUGAGCUUGCUCGCG.....                                      | 4      |
| .....GUAAACUGAGCUUGCUCGCGU.....                                     | 11     |
| .....UAAACUGAGCUUGCUCG.....                                         | 26     |
| .....UAAACUGAGCUUGCUCG.....                                         | 350    |
| .....UAAACUGAGCUUGCUCGCGU.....                                      | 7      |
| .....AAACUGAGCUUGCUCG.....                                          | 20     |

|                                     |        |
|-------------------------------------|--------|
| .....AAACUGAGCUUGCUCGC.....         | 395    |
| .....AAACUGAGCUUGCUCGCG.....        | 2      |
| .....AAACUGAGCUUGCUCGCGU.....       | 2      |
| .....AACUGAGCUUGCUCGC.....          | 186    |
| .....AACUGAGCUUGCUCGCG.....         | 2      |
| .....ACUGAGCUUGCUCGCG.....          | 2      |
| .....ACUGAGCUUGCUCGCGU.....         | 4      |
| .....CUGAGCUUGCUCGCGU.....          | 2      |
| .....CUCGCGUGAAGCCACAGAUGG.....     | 2      |
| .....CGCGUGAAGCCACAGAUGG.....       | 2      |
| .....CGUGAAGCCACAGAUGG.....         | 10     |
| .....CGUGAAGCCACAGAUGGCG.....       | 123    |
| .....GUGAAGCCACAGAUGG.....          | 4      |
| .....GUGAAGCCACAGAUGGC.....         | 1863   |
| .....GUGAAGCCACAGAUGGCG.....        | 12     |
| .....GUGAAGCCACAGAUGGCGAG.....      | 2      |
| .....UGAAGCCACAGAUGGC.....          | 35     |
| .....UGAAGCCACAGAUGGCG.....         | 4      |
| .....GAAGCCACAGAUGGCG.....          | 4      |
| .....CCACAGAUGGCGAGCAAGCUCGUUU..... | 2      |
| .....CACAGAUGGCGAGCAAGCUCGUUU.....  | 2      |
| .....CAGAUGGCGAGCAAGCU.....         | 2      |
| .....CAGAUGGCGAGCAAGCUCGUUU.....    | 2      |
| .....CAGAUGGCGAGCAAGCUCGUUUACA..... | 3      |
| .....UGGCGAGCAAGCUCGUUUACACGGC..... | 2      |
| .....GGCGAGCAAGCUCGUUUAC.....       | 2      |
| .....CGAGCAAGCUCGUUUAC.....         | 2      |
| .....CGAGCAAGCUCGUUUACAC.....       | 5      |
| .....CGAGCAAGCUCGUUUACACG.....      | 8      |
| .....CGAGCAAGCUCGUUUACACGG.....     | 659    |
| .....CGAGCAAGCUCGUUUACACGGC.....    | 5983   |
| .....CGAGCAAGCUCGUUUACACGGCU.....   | 719    |
| .....GAGCAAGCUCGUUUAC.....          | 17     |
| .....GAGCAAGCUCGUUUACA.....         | 20     |
| .....GAGCAAGCUCGUUUACAC.....        | 72     |
| .....GAGCAAGCUCGUUUACACG.....       | 18     |
| .....GAGCAAGCUCGUUUACACGG.....      | 1637   |
| .....GAGCAAGCUCGUUUACACGGC.....     | 119701 |
| .....GAGCAAGCUCGUUUACACGGCU.....    | 51034  |
| .....GAGCAAGCUCGUUUACACGGCUG.....   | 16     |
| .....AGCAAGCUCGUUUACAC.....         | 2      |
| .....AGCAAGCUCGUUUACACG.....        | 7      |
| .....AGCAAGCUCGUUUACACGG.....       | 115    |
| .....AGCAAGCUCGUUUACACGGC.....      | 5844   |
| .....AGCAAGCUCGUUUACACGGCU.....     | 3487   |
| .....GCAAGCUCGUUUACACGG.....        | 41     |
| .....GCAAGCUCGUUUACACGGC.....       | 2233   |

|                             |     |
|-----------------------------|-----|
| .....GCAAGCUCCGUUUACACGGCU. | 956 |
| .....CAAGCUCCGUUUACACGG..   | 10  |
| .....CAAGCUCCGUUUACACGGC.   | 257 |
| .....CAAGCUCCGUUUACACGGCU.  | 540 |
| .....AAGCUCCGUUUACACGG..    | 34  |
| .....AAGCUCCGUUUACACGGC..   | 671 |
| .....AAGCUCCGUUUACACGGCU.   | 488 |
| .....AGCUCCGUUUACACGG..     | 10  |
| .....AGCUCCGUUUACACGGC..    | 782 |
| .....AGCUCCGUUUACACGGCU.    | 207 |
| .....GCUCCGUUUACACGGC..     | 557 |
| .....GCUCCGUUUACACGGCU.     | 107 |
| .....CUCCGUUUACACGGCU.      | 290 |

**#Pri-miR-150/NCCR5**

|                                                                     | Reads |
|---------------------------------------------------------------------|-------|
| CCUGGGUGUAAACUGAGCUUGCUCGCCUGGGCUCAGAGGGAGCAAGCUCCGUUUACACGCAGGGACC |       |
| .CUGGGUGUAAACUGAGCUUGC.....                                         | 2     |
| .CUGGGUGUAAACUGAGCUUGCUCGCC.....                                    | 3     |
| .UGGGUGUAAACUGAGCUUGC.....                                          | 2     |
| .UGGGUGUAAACUGAGCUUGC.....                                          | 30    |
| .UGGGUGUAAACUGAGCUUGCUC.....                                        | 295   |
| .UGGGUGUAAACUGAGCUUGCUCGC.....                                      | 2     |
| .GGGUGUAAACUGAGCU.....                                              | 2     |
| .GGGUGUAAACUGAGCUUGCUCG.....                                        | 2     |
| .GGGUGUAAACUGAGCUUGCUCGC.....                                       | 214   |
| .GGGUGUAAACUGAGCUUGCUCGCC.....                                      | 13    |
| .GGGUGUAAACUGAGCUUGCUCGCCU.....                                     | 5     |
| .GGUGUAAACUGAGCUUG.....                                             | 4     |
| .GGUGUAAACUGAGCUUGC.....                                            | 915   |
| .GGUGUAAACUGAGCUUGC.....                                            | 180   |
| .GGUGUAAACUGAGCUUGCUC.....                                          | 104   |
| .GGUGUAAACUGAGCUUGCUCG.....                                         | 6984  |
| .GGUGUAAACUGAGCUUGCUCGC.....                                        | 80997 |
| .GGUGUAAACUGAGCUUGCUCGCC.....                                       | 28315 |
| .GGUGUAAACUGAGCUUGCUCGCCU.....                                      | 3593  |
| .GGUGUAAACUGAGCUUGCUCGCCUG.....                                     | 4     |
| .GGUGUAAACUGAGCUUGCUCGCCUGG.....                                    | 2     |
| .GUGUAAACUGAGCUUGC.....                                             | 2     |
| .GUGUAAACUGAGCUUGCUC.....                                           | 3     |
| .GUGUAAACUGAGCUUGCUCG.....                                          | 19    |
| .GUGUAAACUGAGCUUGCUCGC.....                                         | 577   |
| .GUGUAAACUGAGCUUGCUCGCC.....                                        | 73    |
| .GUGUAAACUGAGCUUGCUCGCCU.....                                       | 24    |
| .UGUAAACUGAGCUUGC.....                                              | 7     |
| .UGUAAACUGAGCUUGCUC.....                                            | 3     |
| .UGUAAACUGAGCUUGCUCG.....                                           | 25    |
| .UGUAAACUGAGCUUGCUCGC.....                                          | 777   |

|                                        |       |
|----------------------------------------|-------|
| .....UGUAAACUGAGCUUGCUCGCC.....        | 75    |
| .....UGUAAACUGAGCUUGCUCGCCU.....       | 16    |
| .....GUAAACUGAGCUUGCUCG.....           | 60    |
| .....GUAAACUGAGCUUGCUCG.....           | 1080  |
| .....GUAAACUGAGCUUGCUCGCC.....         | 109   |
| .....GUAAACUGAGCUUGCUCGCCU.....        | 18    |
| .....UAAACUGAGCUUGCUCG.....            | 10    |
| .....UAAACUGAGCUUGCUCG.....            | 231   |
| .....UAAACUGAGCUUGCUCGCC.....          | 20    |
| .....UAAACUGAGCUUGCUCGCCU.....         | 5     |
| .....UAAACUGAGCUUGCUCGCCUGGG.....      | 2     |
| .....AAACUGAGCUUGCUCG.....             | 5     |
| .....AAACUGAGCUUGCUCG.....             | 227   |
| .....AAACUGAGCUUGCUCGCC.....           | 30    |
| .....AAACUGAGCUUGCUCGCCU.....          | 10    |
| .....AACUGAGCUUGCUCG.....              | 96    |
| .....AACUGAGCUUGCUCGCC.....            | 5     |
| .....AACUGAGCUUGCUCGCCU.....           | 5     |
| .....ACUGAGCUUGCUCG.....               | 2     |
| .....ACUGAGCUUGCUCGCC.....             | 16    |
| .....ACUGAGCUUGCUCGCCU.....            | 6     |
| .....CUGAGCUUGCUCGCC.....              | 3     |
| .....CUGAGCUUGCUCGCCU.....             | 7     |
| .....CUGAGCUUGCUCGCCUGGGCU.....        | 2     |
| .....AGCUUGCUCGCCUGGGCU.....           | 2     |
| .....GAGCAAGCUCCGUUUA.....             | 2     |
| .....GAGCAAGCUCCGUUUAC.....            | 8     |
| .....GAGCAAGCUCCGUUUACAC.....          | 6     |
| .....GAGCAAGCUCCGUUUACACG.....         | 12    |
| .....GAGCAAGCUCCGUUUACACGC.....        | 3403  |
| .....GAGCAAGCUCCGUUUACACGCA.....       | 23232 |
| .....GAGCAAGCUCCGUUUACACGCAG.....      | 8     |
| .....GAGCAAGCUCCGUUUACACGCAGGG.....    | 2     |
| .....GAGCAAGCUCCGUUUACACGCAGGGA.....   | 2     |
| .....GAGCAAGCUCCGUUUACACGCAGGGACC..... | 2     |
| .....AGCAAGCUCCGUUUACACGC.....         | 43    |
| .....AGCAAGCUCCGUUUACACGCA.....        | 552   |
| .....AGCAAGCUCCGUUUACACGCAG.....       | 2     |
| .....GCAAGCUCCGUUUACACGC.....          | 68    |
| .....GCAAGCUCCGUUUACACGCA.....         | 319   |
| .....GCAAGCUCCGUUUACACGCAG.....        | 3     |
| .....GCAAGCUCCGUUUACACGCAGGGACC.....   | 4     |
| .....CAAGCUCCGUUUACACGC.....           | 7     |
| .....CAAGCUCCGUUUACACGCA.....          | 56    |
| .....CAAGCUCCGUUUACACGCAG.....         | 3     |
| .....CAAGCUCCGUUUACACGCAGGGAC.....     | 2     |
| .....CAAGCUCCGUUUACACGCAGGGACC.....    | 3     |

|                                |     |
|--------------------------------|-----|
| .....AAGCUCCGUUUACACGC.....    | 22  |
| .....AAGCUCCGUUUACACGCA.....   | 171 |
| .....AAGCUCCGUUUACACGCAGGGA..  | 5   |
| .....AAGCUCCGUUUACACGCAGGGAC.. | 7   |
| .....AAGCUCCGUUUACACGCAGGGACC  | 8   |
| .....AGCUCCGUUUACACGCA.....    | 35  |
| .....AGCUCCGUUUACACGCAGGGACC   | 3   |
| .....GCUCCGUUUACACGCA.....     | 3   |
| .....GCUCCGUUUACACGCAGGGACC    | 3   |
| .....CUCCGUUUACACGCAGGGACC     | 12  |
| .....UCCGUUUACACGCAGGGA..      | 2   |
| .....UCCGUUUACACGCAGGGAC..     | 5   |
| .....UCCGUUUACACGCAGGGACC      | 9   |
| .....CCGUUUACACGCAGGGAC..      | 2   |
| .....CCGUUUACACGCAGGGACC       | 6   |
| .....CGUUUACACGCAGGGACC        | 3   |

**#sh1005**

|                                                             | Reads  |
|-------------------------------------------------------------|--------|
| GUUAGAGCAAGCUCAGUUUACACCUUGUCCGACGGUGUAAACUGAGCUUGCUCUUUUUU |        |
| GUUAGAGCAAGCUCAGUUUACA.....                                 | 7      |
| .UUAGAGCAAGCUCAGUUUACA.....                                 | 5      |
| .UUAGAGCAAGCUCAGUUUACAC.....                                | 9      |
| .UUAGAGCAAGCUCAGUUUACACC.....                               | 19     |
| .UUAGAGCAAGCUCAGUUUACACCU.....                              | 2      |
| ..UAGAGCAAGCUCAGUUU.....                                    | 2      |
| ..UAGAGCAAGCUCAGUUUA.....                                   | 7      |
| ..UAGAGCAAGCUCAGUUUACA.....                                 | 7      |
| ..UAGAGCAAGCUCAGUUUACAC.....                                | 29     |
| ..UAGAGCAAGCUCAGUUUACACC.....                               | 154    |
| ..UAGAGCAAGCUCAGUUUACACCU.....                              | 11     |
| ...AGAGCAAGCUCAGUU.....                                     | 5      |
| ...AGAGCAAGCUCAGUUU.....                                    | 2533   |
| ...AGAGCAAGCUCAGUUUA.....                                   | 4727   |
| ...AGAGCAAGCUCAGUUUAC.....                                  | 3012   |
| ...AGAGCAAGCUCAGUUUACA.....                                 | 8168   |
| ...AGAGCAAGCUCAGUUUACAC.....                                | 52023  |
| ...AGAGCAAGCUCAGUUUACACC.....                               | 224989 |
| ...AGAGCAAGCUCAGUUUACACCU.....                              | 30792  |
| ...AGAGCAAGCUCAGUUUACACCUU.....                             | 3461   |
| ...AGAGCAAGCUCAGUUUACACCUUG.....                            | 1421   |
| ...AGAGCAAGCUCAGUUUACACCUUGU.....                           | 262    |
| ...AGAGCAAGCUCAGUUUACACCUUGUC.....                          | 41     |
| ...AGAGCAAGCUCAGUUUACACCUUGUCC.....                         | 81     |
| ...AGAGCAAGCUCAGUUUACACCUUGUCCG.....                        | 17     |
| ...AGAGCAAGCUCAGUUUACACCUUGUCCGA.....                       | 2      |
| ...AGAGCAAGCUCAGUUUACACCUUGUCCGAC.....                      | 5      |
| ...AGAGCAAGCUCAGUUUACACCUUGUCCGACG.....                     | 15     |

|                                         |      |
|-----------------------------------------|------|
| ...AGCAAGCUCAGUUUACACCUUGUCCGACGGU..... | 2    |
| ...GAGCAAGCUCAGUUUA.....                | 114  |
| ...GAGCAAGCUCAGUUUAC.....               | 97   |
| ...GAGCAAGCUCAGUUUACA.....              | 117  |
| ...GAGCAAGCUCAGUUUACAC.....             | 499  |
| ...GAGCAAGCUCAGUUUACACC.....            | 2537 |
| ...GAGCAAGCUCAGUUUACACCU.....           | 1245 |
| ...GAGCAAGCUCAGUUUACACCUU.....          | 204  |
| ...GAGCAAGCUCAGUUUACACCUUG.....         | 204  |
| ...GAGCAAGCUCAGUUUACACCUUGU.....        | 46   |
| ...GAGCAAGCUCAGUUUACACCUUGUC.....       | 6    |
| ...GAGCAAGCUCAGUUUACACCUUGUCC.....      | 6    |
| ...GAGCAAGCUCAGUUUACACCUUGUCCG.....     | 3    |
| ...AGCAAGCUCAGUUUAC.....                | 42   |
| ...AGCAAGCUCAGUUUACA.....               | 23   |
| ...AGCAAGCUCAGUUUACAC.....              | 141  |
| ...AGCAAGCUCAGUUUACACC.....             | 510  |
| ...AGCAAGCUCAGUUUACACCU.....            | 299  |
| ...AGCAAGCUCAGUUUACACCUU.....           | 70   |
| ...AGCAAGCUCAGUUUACACCUUG.....          | 71   |
| ...AGCAAGCUCAGUUUACACCUUGU.....         | 45   |
| ...AGCAAGCUCAGUUUACACCUUGUC.....        | 21   |
| ...AGCAAGCUCAGUUUACACCUUGUCC.....       | 26   |
| ...AGCAAGCUCAGUUUACACCUUGUCCG.....      | 3    |
| ...AGCAAGCUCAGUUUACACCUUGUCCGA.....     | 9    |
| ...AGCAAGCUCAGUUUACACCUUGUCCGACG.....   | 2    |
| ...GCAAGCUCAGUUUACA.....                | 24   |
| ...GCAAGCUCAGUUUACAC.....               | 74   |
| ...GCAAGCUCAGUUUACACC.....              | 648  |
| ...GCAAGCUCAGUUUACACCU.....             | 149  |
| ...GCAAGCUCAGUUUACACCUU.....            | 36   |
| ...GCAAGCUCAGUUUACACCUUG.....           | 39   |
| ...GCAAGCUCAGUUUACACCUUGU.....          | 60   |
| ...GCAAGCUCAGUUUACACCUUGUC.....         | 6    |
| ...GCAAGCUCAGUUUACACCUUGUCC.....        | 6    |
| ...GCAAGCUCAGUUUACACCUUGUCCG.....       | 2    |
| ...CAAGCUCAGUUUACAC.....                | 70   |
| ...CAAGCUCAGUUUACACC.....               | 174  |
| ...CAAGCUCAGUUUACACCU.....              | 54   |
| ...CAAGCUCAGUUUACACCUU.....             | 14   |
| ...CAAGCUCAGUUUACACCUUG.....            | 26   |
| ...CAAGCUCAGUUUACACCUUGU.....           | 70   |
| ...CAAGCUCAGUUUACACCUUGUC.....          | 8    |
| ...CAAGCUCAGUUUACACCUUGUCC.....         | 13   |
| ...CAAGCUCAGUUUACACCUUGUCCG.....        | 17   |
| ...CAAGCUCAGUUUACACCUUGUCCGAC.....      | 3    |
| ...CAAGCUCAGUUUACACCUUGUCCGACG.....     | 4    |

|                                      |     |
|--------------------------------------|-----|
| .....AAGCUCAGUUUACACC.....           | 648 |
| .....AAGCUCAGUUUACACCU.....          | 166 |
| .....AAGCUCAGUUUACACCUU.....         | 41  |
| .....AAGCUCAGUUUACACCUUG.....        | 32  |
| .....AAGCUCAGUUUACACCUUGU.....       | 100 |
| .....AAGCUCAGUUUACACCUUGUC.....      | 17  |
| .....AAGCUCAGUUUACACCUUGUCC.....     | 9   |
| .....AAGCUCAGUUUACACCUUGUCCG.....    | 20  |
| .....AAGCUCAGUUUACACCUUGUCCGA.....   | 7   |
| .....AAGCUCAGUUUACACCUUGUCCGAC.....  | 5   |
| .....AAGCUCAGUUUACACCUUGUCCGACG..... | 7   |
| .....AGCUCAGUUUACACC.....            | 4   |
| .....AGCUCAGUUUACACCU.....           | 81  |
| .....AGCUCAGUUUACACCUU.....          | 16  |
| .....AGCUCAGUUUACACCUUG.....         | 13  |
| .....AGCUCAGUUUACACCUUGU.....        | 195 |
| .....AGCUCAGUUUACACCUUGUC.....       | 14  |
| .....AGCUCAGUUUACACCUUGUCC.....      | 8   |
| .....AGCUCAGUUUACACCUUGUCCG.....     | 7   |
| .....AGCUCAGUUUACACCUUGUCCGA.....    | 5   |
| .....AGCUCAGUUUACACCUUGUCCGAC.....   | 6   |
| .....AGCUCAGUUUACACCUUGUCCGACG.....  | 7   |
| .....AGCUCAGUUUACACCUUGUCCGACGG..... | 7   |
| .....GCUCAGUUUACACCUU.....           | 14  |
| .....GCUCAGUUUACACCUUG.....          | 4   |
| .....GCUCAGUUUACACCUUGU.....         | 19  |
| .....GCUCAGUUUACACCUUGUC.....        | 2   |
| .....GCUCAGUUUACACCUUGUCC.....       | 12  |
| .....GCUCAGUUUACACCUUGUCCG.....      | 7   |
| .....GCUCAGUUUACACCUUGUCCGAC.....    | 11  |
| .....GCUCAGUUUACACCUUGUCCGACG.....   | 16  |
| .....GCUCAGUUUACACCUUGUCCGACGG.....  | 6   |
| .....CUCAGUUUACACCUUG.....           | 11  |
| .....CUCAGUUUACACCUUGU.....          | 3   |
| .....CUCAGUUUACACCUUGUC.....         | 4   |
| .....CUCAGUUUACACCUUGUCC.....        | 7   |
| .....CUCAGUUUACACCUUGUCCG.....       | 27  |
| .....CUCAGUUUACACCUUGUCCGA.....      | 5   |
| .....CUCAGUUUACACCUUGUCCGAC.....     | 15  |
| .....CUCAGUUUACACCUUGUCCGACG.....    | 39  |
| .....CUCAGUUUACACCUUGUCCGACGG.....   | 43  |
| .....CUCAGUUUACACCUUGUCCGACGGU.....  | 12  |
| .....UCAGUUUACACCUUGU.....           | 6   |
| .....UCAGUUUACACCUUGUC.....          | 6   |
| .....UCAGUUUACACCUUGUCC.....         | 6   |
| .....UCAGUUUACACCUUGUCCG.....        | 33  |
| .....UCAGUUUACACCUUGUCCGA.....       | 9   |

|                                        |    |
|----------------------------------------|----|
| .....UCAGUUUACACCUUGUCCGAC.....        | 20 |
| .....UCAGUUUACACCUUGUCCGACG.....       | 54 |
| .....UCAGUUUACACCUUGUCCGACGG.....      | 61 |
| .....UCAGUUUACACCUUGUCCGACGGU.....     | 9  |
| .....UCAGUUUACACCUUGUCCGACGGUG.....    | 2  |
| .....CAGUUUACACCUUGUCC.....            | 7  |
| .....CAGUUUACACCUUGUCCG.....           | 16 |
| .....CAGUUUACACCUUGUCCGA.....          | 5  |
| .....CAGUUUACACCUUGUCCGAC.....         | 26 |
| .....CAGUUUACACCUUGUCCGACG.....        | 35 |
| .....CAGUUUACACCUUGUCCGACGG.....       | 23 |
| .....CAGUUUACACCUUGUCCGACGGU.....      | 9  |
| .....CAGUUUACACCUUGUCCGACGGUG.....     | 7  |
| .....CAGUUUACACCUUGUCCGACGGUGU.....    | 3  |
| .....CAGUUUACACCUUGUCCGACGGUGUAAA..... | 2  |
| .....AGUUUACACCUUGUCC.....             | 3  |
| .....AGUUUACACCUUGUCCG.....            | 11 |
| .....AGUUUACACCUUGUCCGAC.....          | 9  |
| .....AGUUUACACCUUGUCCGACG.....         | 25 |
| .....AGUUUACACCUUGUCCGACGG.....        | 21 |
| .....AGUUUACACCUUGUCCGACGGU.....       | 9  |
| .....AGUUUACACCUUGUCCGACGGUG.....      | 16 |
| .....AGUUUACACCUUGUCCGACGGUGU.....     | 5  |
| .....GUUUACACCUUGUCCG.....             | 6  |
| .....GUUUACACCUUGUCCGA.....            | 3  |
| .....GUUUACACCUUGUCCGAC.....           | 10 |
| .....GUUUACACCUUGUCCGACG.....          | 13 |
| .....GUUUACACCUUGUCCGACGG.....         | 20 |
| .....GUUUACACCUUGUCCGACGGU.....        | 6  |
| .....GUUUACACCUUGUCCGACGGUG.....       | 12 |
| .....GUUUACACCUUGUCCGACGGUGU.....      | 11 |
| .....GUUUACACCUUGUCCGACGGUGUA.....     | 6  |
| .....UUUACACCUUGUCCGA.....             | 2  |
| .....UUUACACCUUGUCCGAC.....            | 10 |
| .....UUUACACCUUGUCCGACG.....           | 31 |
| .....UUUACACCUUGUCCGACGG.....          | 52 |
| .....UUUACACCUUGUCCGACGGU.....         | 29 |
| .....UUUACACCUUGUCCGACGGUG.....        | 48 |
| .....UUUACACCUUGUCCGACGGUGU.....       | 27 |
| .....UUUACACCUUGUCCGACGGUGUA.....      | 14 |
| .....UUACACCUUGUCCGAC.....             | 5  |
| .....UUACACCUUGUCCGACG.....            | 22 |
| .....UUACACCUUGUCCGACGG.....           | 32 |
| .....UUACACCUUGUCCGACGGU.....          | 26 |
| .....UUACACCUUGUCCGACGGUG.....         | 29 |
| .....UUACACCUUGUCCGACGGUGU.....        | 10 |
| .....UACACCUUGUCCGACG.....             | 25 |



|                                         |     |
|-----------------------------------------|-----|
| .....UACACCUUGUCCGACGG.....             | 66  |
| .....UACACCUUGUCCGACGGU.....            | 22  |
| .....UACACCUUGUCCGACGGUG.....           | 18  |
| .....UACACCUUGUCCGACGGUGU.....          | 40  |
| .....UACACCUUGUCCGACGGUGUAAA.....       | 13  |
| .....UACACCUUGUCCGACGGUGUAAAC.....      | 4   |
| .....ACACCUUGUCCGACGG.....              | 66  |
| .....ACACCUUGUCCGACGGU.....             | 20  |
| .....ACACCUUGUCCGACGGUG.....            | 17  |
| .....ACACCUUGUCCGACGGUGUA.....          | 20  |
| .....ACACCUUGUCCGACGGUGUAA.....         | 19  |
| .....ACACCUUGUCCGACGGUGUAAA.....        | 19  |
| .....ACACCUUGUCCGACGGUGUAAAC.....       | 6   |
| .....ACACCUUGUCCGACGGUGUAAACU.....      | 3   |
| .....CACCUUGUCCGACGGU.....              | 67  |
| .....CACCUUGUCCGACGGUG.....             | 2   |
| .....CACCUUGUCCGACGGUGU.....            | 41  |
| .....CACCUUGUCCGACGGUGUA.....           | 96  |
| .....CACCUUGUCCGACGGUGUAA.....          | 26  |
| .....CACCUUGUCCGACGGUGUAAA.....         | 100 |
| .....CACCUUGUCCGACGGUGUAAAC.....        | 67  |
| .....CACCUUGUCCGACGGUGUAAACU.....       | 10  |
| .....ACCUUGUCCGACGGUG.....              | 73  |
| .....ACCUUGUCCGACGGUGU.....             | 84  |
| .....ACCUUGUCCGACGGUGUA.....            | 143 |
| .....ACCUUGUCCGACGGUGUAA.....           | 27  |
| .....ACCUUGUCCGACGGUGUAAA.....          | 191 |
| .....ACCUUGUCCGACGGUGUAAAC.....         | 90  |
| .....ACCUUGUCCGACGGUGUAAACU.....        | 29  |
| .....ACCUUGUCCGACGGUGUAAACUGA.....      | 19  |
| .....ACCUUGUCCGACGGUGUAAACUGAG.....     | 10  |
| .....ACCUUGUCCGACGGUGUAAACUGAGCUUG..... | 3   |
| .....CCUUGUCCGACGGUGU.....              | 70  |
| .....CCUUGUCCGACGGUGUA.....             | 157 |
| .....CCUUGUCCGACGGUGUAA.....            | 56  |
| .....CCUUGUCCGACGGUGUAAA.....           | 174 |
| .....CCUUGUCCGACGGUGUAAAC.....          | 125 |
| .....CCUUGUCCGACGGUGUAAACU.....         | 54  |
| .....CCUUGUCCGACGGUGUAAACUG.....        | 4   |
| .....CCUUGUCCGACGGUGUAAACUGA.....       | 38  |
| .....CCUUGUCCGACGGUGUAAACUGAG.....      | 53  |
| .....CCUUGUCCGACGGUGUAAACUGAGC.....     | 11  |
| .....CCUUGUCCGACGGUGUAAACUGAGCU.....    | 8   |
| .....CCUUGUCCGACGGUGUAAACUGAGCUU.....   | 4   |
| .....CCUUGUCCGACGGUGUAAACUGAGCUUG.....  | 9   |
| .....CCUUGUCCGACGGUGUAAACUGAGCUUGC..... | 4   |
| .....CCUUGUCCGACGGUGUAAACUGAGCUUGC..... | 2   |

|                                              |     |
|----------------------------------------------|-----|
| .....CCUUGUCCGACGGUGUAAACUGAGCUUGCUC.....    | 2   |
| .....CCUUGUCCGACGGUGUAAACUGAGCUUGCUCUU.....  | 3   |
| .....CCUUGUCCGACGGUGUAAACUGAGCUUGCUCUUU..... | 9   |
| .....CUUGUCCGACGGUGUA.....                   | 111 |
| .....CUUGUCCGACGGUGUAA.....                  | 50  |
| .....CUUGUCCGACGGUGUAAA.....                 | 190 |
| .....CUUGUCCGACGGUGUAAAC.....                | 176 |
| .....CUUGUCCGACGGUGUAAACU.....               | 90  |
| .....CUUGUCCGACGGUGUAAACUG.....              | 5   |
| .....CUUGUCCGACGGUGUAAACUGA.....             | 64  |
| .....CUUGUCCGACGGUGUAAACUGAG.....            | 138 |
| .....CUUGUCCGACGGUGUAAACUGAGC.....           | 58  |
| .....CUUGUCCGACGGUGUAAACUGAGCU.....          | 46  |
| .....CUUGUCCGACGGUGUAAACUGAGCUU.....         | 24  |
| .....CUUGUCCGACGGUGUAAACUGAGCUUG.....        | 26  |
| .....CUUGUCCGACGGUGUAAACUGAGCUUGC.....       | 11  |
| .....CUUGUCCGACGGUGUAAACUGAGCUUGC.....       | 5   |
| .....CUUGUCCGACGGUGUAAACUGAGCUUGCUC.....     | 2   |
| .....CUUGUCCGACGGUGUAAACUGAGCUUGCUCUU.....   | 3   |
| .....CUUGUCCGACGGUGUAAACUGAGCUUGCUCUUU.....  | 18  |
| .....UUGUCCGACGGUGUAA.....                   | 33  |
| .....UUGUCCGACGGUGUAAA.....                  | 78  |
| .....UUGUCCGACGGUGUAAAC.....                 | 51  |
| .....UUGUCCGACGGUGUAAACU.....                | 29  |
| .....UUGUCCGACGGUGUAAACUG.....               | 3   |
| .....UUGUCCGACGGUGUAAACUGA.....              | 28  |
| .....UUGUCCGACGGUGUAAACUGAG.....             | 47  |
| .....UUGUCCGACGGUGUAAACUGAGC.....            | 21  |
| .....UUGUCCGACGGUGUAAACUGAGCU.....           | 37  |
| .....UUGUCCGACGGUGUAAACUGAGCUU.....          | 36  |
| .....UUGUCCGACGGUGUAAACUGAGCUUG.....         | 20  |
| .....UUGUCCGACGGUGUAAACUGAGCUUGC.....        | 6   |
| .....UUGUCCGACGGUGUAAACUGAGCUUGC.....        | 2   |
| .....UUGUCCGACGGUGUAAACUGAGCUUGCUC.....      | 3   |
| .....UUGUCCGACGGUGUAAACUGAGCUUGCUCUU.....    | 6   |
| .....UUGUCCGACGGUGUAAACUGAGCUUGCUCUUU.....   | 32  |
| .....UUGUCCGACGGUGUAAACUGAGCUUGCUCUUUU.....  | 3   |
| .....UGUCCGACGGUGUAAA.....                   | 21  |
| .....UGUCCGACGGUGUAAAC.....                  | 23  |
| .....UGUCCGACGGUGUAAACU.....                 | 23  |
| .....UGUCCGACGGUGUAAACUG.....                | 2   |
| .....UGUCCGACGGUGUAAACUGA.....               | 26  |
| .....UGUCCGACGGUGUAAACUGAG.....              | 35  |
| .....UGUCCGACGGUGUAAACUGAGC.....             | 24  |
| .....UGUCCGACGGUGUAAACUGAGCU.....            | 42  |
| .....UGUCCGACGGUGUAAACUGAGCUU.....           | 51  |
| .....UGUCCGACGGUGUAAACUGAGCUUG.....          | 32  |

|                                           |     |
|-------------------------------------------|-----|
| .....UGUCCGACGGUGUAAACUGAGCUUGC.....      | 3   |
| .....UGUCCGACGGUGUAAACUGAGCUUGC.....      | 5   |
| .....UGUCCGACGGUGUAAACUGAGCUUGCUCU.....   | 4   |
| .....UGUCCGACGGUGUAAACUGAGCUUGCUCUU.....  | 14  |
| .....UGUCCGACGGUGUAAACUGAGCUUGCUCUUU..... | 45  |
| .....GUCCGACGGUGUAAAC.....                | 11  |
| .....GUCCGACGGUGUAAACU.....               | 6   |
| .....GUCCGACGGUGUAAACUGA.....             | 4   |
| .....GUCCGACGGUGUAAACUGAG.....            | 16  |
| .....GUCCGACGGUGUAAACUGAGC.....           | 9   |
| .....GUCCGACGGUGUAAACUGAGCU.....          | 14  |
| .....GUCCGACGGUGUAAACUGAGCUU.....         | 16  |
| .....GUCCGACGGUGUAAACUGAGCUUG.....        | 28  |
| .....GUCCGACGGUGUAAACUGAGCUUGC.....       | 8   |
| .....GUCCGACGGUGUAAACUGAGCUUGCUCU.....    | 6   |
| .....GUCCGACGGUGUAAACUGAGCUUGCUCUU.....   | 18  |
| .....GUCCGACGGUGUAAACUGAGCUUGCUCUUU.....  | 40  |
| .....GUCCGACGGUGUAAACUGAGCUUGCUCUUUU..... | 4   |
| .....UCCGACGGUGUAAACU.....                | 3   |
| .....UCCGACGGUGUAAACUG.....               | 3   |
| .....UCCGACGGUGUAAACUGA.....              | 6   |
| .....UCCGACGGUGUAAACUGAG.....             | 5   |
| .....UCCGACGGUGUAAACUGAGC.....            | 3   |
| .....UCCGACGGUGUAAACUGAGCU.....           | 9   |
| .....UCCGACGGUGUAAACUGAGCUU.....          | 13  |
| .....UCCGACGGUGUAAACUGAGCUUG.....         | 21  |
| .....UCCGACGGUGUAAACUGAGCUUGC.....        | 19  |
| .....UCCGACGGUGUAAACUGAGCUUGCUCU.....     | 2   |
| .....UCCGACGGUGUAAACUGAGCUUGCUCU.....     | 4   |
| .....UCCGACGGUGUAAACUGAGCUUGCUCUU.....    | 11  |
| .....UCCGACGGUGUAAACUGAGCUUGCUCUUU.....   | 51  |
| .....UCCGACGGUGUAAACUGAGCUUGCUCUUUU.....  | 6   |
| .....UCCGACGGUGUAAACUGAGCUUGCUCUUUUU..... | 2   |
| .....CCGACGGUGUAAACUG.....                | 77  |
| .....CCGACGGUGUAAACUGA.....               | 265 |
| .....CCGACGGUGUAAACUGAG.....              | 846 |
| .....CCGACGGUGUAAACUGAGC.....             | 13  |
| .....CCGACGGUGUAAACUGAGCU.....            | 11  |
| .....CCGACGGUGUAAACUGAGCUU.....           | 18  |
| .....CCGACGGUGUAAACUGAGCUUG.....          | 29  |
| .....CCGACGGUGUAAACUGAGCUUGC.....         | 31  |
| .....CCGACGGUGUAAACUGAGCUUGCUCU.....      | 16  |
| .....CCGACGGUGUAAACUGAGCUUGCUC.....       | 3   |
| .....CCGACGGUGUAAACUGAGCUUGCUCU.....      | 13  |
| .....CCGACGGUGUAAACUGAGCUUGCUCUU.....     | 31  |
| .....CCGACGGUGUAAACUGAGCUUGCUCUUU.....    | 81  |
| .....CCGACGGUGUAAACUGAGCUUGCUCUUUU.....   | 10  |

|                                         |     |
|-----------------------------------------|-----|
| .....CGACGGUGUAAACUGA.....              | 129 |
| .....CGACGGUGUAAACUGAG.....             | 374 |
| .....CGACGGUGUAAACUGAGC.....            | 14  |
| .....CGACGGUGUAAACUGAGCU.....           | 10  |
| .....CGACGGUGUAAACUGAGCUU.....          | 16  |
| .....CGACGGUGUAAACUGAGCUUG.....         | 36  |
| .....CGACGGUGUAAACUGAGCUUGC.....        | 32  |
| .....CGACGGUGUAAACUGAGCUUGCUC.....      | 15  |
| .....CGACGGUGUAAACUGAGCUUGCUC.....      | 23  |
| .....CGACGGUGUAAACUGAGCUUGCUCU.....     | 35  |
| .....CGACGGUGUAAACUGAGCUUGCUCUU.....    | 42  |
| .....CGACGGUGUAAACUGAGCUUGCUCUUU.....   | 149 |
| .....CGACGGUGUAAACUGAGCUUGCUCUUUU.....  | 14  |
| .....CGACGGUGUAAACUGAGCUUGCUCUUUUU..... | 2   |
| .....GACGGUGUAAACUGAG.....              | 16  |
| .....GACGGUGUAAACUGAGC.....             | 13  |
| .....GACGGUGUAAACUGAGCU.....            | 9   |
| .....GACGGUGUAAACUGAGCUU.....           | 19  |
| .....GACGGUGUAAACUGAGCUUG.....          | 38  |
| .....GACGGUGUAAACUGAGCUUGC.....         | 36  |
| .....GACGGUGUAAACUGAGCUUGCUC.....       | 54  |
| .....GACGGUGUAAACUGAGCUUGCUC.....       | 68  |
| .....GACGGUGUAAACUGAGCUUGCUCU.....      | 134 |
| .....GACGGUGUAAACUGAGCUUGCUCUU.....     | 173 |
| .....GACGGUGUAAACUGAGCUUGCUCUUU.....    | 435 |
| .....GACGGUGUAAACUGAGCUUGCUCUUUU.....   | 30  |
| .....GACGGUGUAAACUGAGCUUGCUCUUUUU.....  | 6   |
| .....ACGGUGUAAACUGAGC.....              | 12  |
| .....ACGGUGUAAACUGAGCU.....             | 24  |
| .....ACGGUGUAAACUGAGCUU.....            | 33  |
| .....ACGGUGUAAACUGAGCUUG.....           | 51  |
| .....ACGGUGUAAACUGAGCUUGC.....          | 46  |
| .....ACGGUGUAAACUGAGCUUGCUC.....        | 71  |
| .....ACGGUGUAAACUGAGCUUGCUC.....        | 187 |
| .....ACGGUGUAAACUGAGCUUGCUCU.....       | 422 |
| .....ACGGUGUAAACUGAGCUUGCUCUU.....      | 641 |
| .....ACGGUGUAAACUGAGCUUGCUCUUU.....     | 683 |
| .....ACGGUGUAAACUGAGCUUGCUCUUUU.....    | 23  |
| .....ACGGUGUAAACUGAGCUUGCUCUUUUU.....   | 6   |
| .....ACGGUGUAAACUGAGCUUGCUCUUUUUU.....  | 4   |
| .....CGGUGUAAACUGAGCU.....              | 7   |
| .....CGGUGUAAACUGAGCUU.....             | 7   |
| .....CGGUGUAAACUGAGCUUG.....            | 19  |
| .....CGGUGUAAACUGAGCUUGC.....           | 24  |
| .....CGGUGUAAACUGAGCUUGCUC.....         | 31  |
| .....CGGUGUAAACUGAGCUUGCUC.....         | 99  |
| .....CGGUGUAAACUGAGCUUGCUCU.....        | 620 |

|                                  |         |
|----------------------------------|---------|
| .....CGGUGUAAACUGAGCUUGCUCUU.... | 314     |
| .....CGGUGUAAACUGAGCUUGCUCUUU... | 690     |
| .....CGGUGUAAACUGAGCUUGCUCUUUU.. | 33      |
| .....CGGUGUAAACUGAGCUUGCUCUUUUU. | 2       |
| .....GGUGUAAACUGAGCUU.....       | 8       |
| .....GGUGUAAACUGAGCUUG.....      | 12      |
| .....GGUGUAAACUGAGCUUGC.....     | 11      |
| .....GGUGUAAACUGAGCUUGCUC.....   | 19      |
| .....GGUGUAAACUGAGCUUGCUC.....   | 21      |
| .....GGUGUAAACUGAGCUUGCUCU....   | 80      |
| .....GGUGUAAACUGAGCUUGCUCUU...   | 116     |
| .....GGUGUAAACUGAGCUUGCUCUUU...  | 557     |
| .....GGUGUAAACUGAGCUUGCUCUUUU..  | 56      |
| .....GGUGUAAACUGAGCUUGCUCUUUUU.  | 2       |
| .....GGUGUAAACUGAGCUUGCUCUUUUUU  | 3       |
| .....GUGUAAACUGAGCUUG.....       | 62      |
| .....GUGUAAACUGAGCUUGC.....      | 67      |
| .....GUGUAAACUGAGCUUGCUC.....    | 74      |
| .....GUGUAAACUGAGCUUGCUC.....    | 118     |
| .....GUGUAAACUGAGCUUGCUCU....    | 307     |
| .....GUGUAAACUGAGCUUGCUCUU...    | 3326    |
| .....GUGUAAACUGAGCUUGCUCUUU...   | 31090   |
| .....GUGUAAACUGAGCUUGCUCUUUU..   | 3823    |
| .....GUGUAAACUGAGCUUGCUCUUUUU.   | 285     |
| .....GUGUAAACUGAGCUUGCUCUUUUUU   | 124     |
| .....UGUAAACUGAGCUUG.....        | 4       |
| .....UGUAAACUGAGCUUGC.....       | 426     |
| .....UGUAAACUGAGCUUGCUC.....     | 706     |
| .....UGUAAACUGAGCUUGCUC.....     | 1283    |
| .....UGUAAACUGAGCUUGCUCU....     | 6079    |
| .....UGUAAACUGAGCUUGCUCUU...     | 55404   |
| .....UGUAAACUGAGCUUGCUCUUU...    | 1011231 |
| .....UGUAAACUGAGCUUGCUCUUUU..    | 173546  |
| .....UGUAAACUGAGCUUGCUCUUUUU.    | 11768   |
| .....UGUAAACUGAGCUUGCUCUUUUUU    | 7701    |
| .....GUAACUGAGCUUGCUC.....       | 35      |
| .....GUAACUGAGCUUGCUC.....       | 90      |
| .....GUAACUGAGCUUGCUCU....       | 246     |
| .....GUAACUGAGCUUGCUCUU...       | 904     |
| .....GUAACUGAGCUUGCUCUUU...      | 13634   |
| .....GUAACUGAGCUUGCUCUUUU..      | 2239    |
| .....GUAACUGAGCUUGCUCUUUUU.      | 198     |
| .....GUAACUGAGCUUGCUCUUUUUU      | 130     |
| .....UAAACUGAGCUUGCUC.....       | 11      |
| .....UAAACUGAGCUUGCUCU....       | 60      |
| .....UAAACUGAGCUUGCUCUU...       | 265     |
| .....UAAACUGAGCUUGCUCUUU...      | 3148    |

|                             |      |
|-----------------------------|------|
| .....UAAACUGAGCUUGCUCUUUU.. | 537  |
| .....UAAACUGAGCUUGCUCUUUUU. | 88   |
| .....UAAACUGAGCUUGCUCUUUUUU | 87   |
| .....AAACUGAGCUUGCUCU.....  | 55   |
| .....AAACUGAGCUUGCUCUU..... | 266  |
| .....AAACUGAGCUUGCUCUUU...  | 3712 |
| .....AAACUGAGCUUGCUCUUUU..  | 549  |
| .....AAACUGAGCUUGCUCUUUUU.  | 59   |
| .....AAACUGAGCUUGCUCUUUUUU  | 18   |
| .....AACUGAGCUUGCUCUU.....  | 130  |
| .....AACUGAGCUUGCUCUUU...   | 1179 |
| .....AACUGAGCUUGCUCUUUU..   | 214  |
| .....AACUGAGCUUGCUCUUUUU.   | 19   |
| .....AACUGAGCUUGCUCUUUUUU   | 10   |
| .....ACUGAGCUUGCUCUUU...    | 1105 |
| .....ACUGAGCUUGCUCUUUU..    | 153  |
| .....ACUGAGCUUGCUCUUUUU.    | 13   |
| .....ACUGAGCUUGCUCUUUUUU    | 9    |
| .....CUGAGCUUGCUCUUU...     | 13   |
| .....CUGAGCUUGCUCUUUU..     | 262  |
| .....CUGAGCUUGCUCUUUUU.     | 34   |
| .....CUGAGCUUGCUCUUUUUU     | 12   |
| .....UGAGCUUGCUCUUUUU..     | 74   |
| .....UGAGCUUGCUCUUUUUU      | 30   |
| .....GAGCUUGCUCUUUUUU       | 4    |

**#Pri-miR-30/WCCR5**

|                                                                      | Reads  |
|----------------------------------------------------------------------|--------|
| CGACUGUAAACUGAGCUUGCUCUACUGUGAAGCCACAGAUGGGUAGAGCAAGCACAGUUUACCGCUGC |        |
| .GACUGUAAACUGAGCUUGCUCUACU.....                                      | 3      |
| ..ACUGUAAACUGAGCUUGCUCU.....                                         | 2      |
| ..ACUGUAAACUGAGCUUGCUCUA.....                                        | 4      |
| ..ACUGUAAACUGAGCUUGCUCUAC.....                                       | 4      |
| ..ACUGUAAACUGAGCUUGCUCUACU.....                                      | 18     |
| ...CUGUAAACUGAGCUUGCUCUAC.....                                       | 5      |
| ...CUGUAAACUGAGCUUGCUCUACU.....                                      | 94     |
| ...UGUAAACUGAGCUUG.....                                              | 3      |
| ...UGUAAACUGAGCUUGC.....                                             | 36     |
| ...UGUAAACUGAGCUUGC.....                                             | 106    |
| ...UGUAAACUGAGCUUGCUC.....                                           | 133    |
| ...UGUAAACUGAGCUUGCUCU.....                                          | 261    |
| ...UGUAAACUGAGCUUGCUCUA.....                                         | 914    |
| ...UGUAAACUGAGCUUGCUCUAC.....                                        | 16714  |
| ...UGUAAACUGAGCUUGCUCUACU.....                                       | 467973 |
| ...UGUAAACUGAGCUUGCUCUACUG.....                                      | 52     |
| ...UGUAAACUGAGCUUGCUCUACUGU.....                                     | 11     |
| ...UGUAAACUGAGCUUGCUCUACUGUGA.....                                   | 3      |
| ...UGUAAACUGAGCUUGCUCUACUGUGAA.....                                  | 2      |

|                                        |        |
|----------------------------------------|--------|
| .....UGUAAACUGAGCUUGCUCUACUGUGAAG..... | 3      |
| .....GUAACUGAGCUUGCUC.....             | 4      |
| .....GUAACUGAGCUUGCUCU.....            | 5      |
| .....GUAACUGAGCUUGCUCUA.....           | 16     |
| .....GUAACUGAGCUUGCUCUAC.....          | 348    |
| .....GUAACUGAGCUUGCUCUACU.....         | 7362   |
| .....GUAACUGAGCUUGCUCUACUG.....        | 3      |
| .....UAAACUGAGCUUGCUCUA.....           | 4      |
| .....UAAACUGAGCUUGCUCUAC.....          | 58     |
| .....UAAACUGAGCUUGCUCUACU.....         | 1296   |
| .....AAACUGAGCUUGCUCU.....             | 2      |
| .....AAACUGAGCUUGCUCUA.....            | 2      |
| .....AAACUGAGCUUGCUCUAC.....           | 79     |
| .....AAACUGAGCUUGCUCUACU.....          | 1982   |
| .....AACUGAGCUUGCUCUAC.....            | 30     |
| .....AACUGAGCUUGCUCUACU.....           | 934    |
| .....ACUGAGCUUGCUCUAC.....             | 16     |
| .....ACUGAGCUUGCUCUACU.....            | 586    |
| .....CUGAGCUUGCUCUACU.....             | 825    |
| .....UGAGCUUGCUCUACU.....              | 9      |
| .....UUGCUCUACUGUGAAGCCACAGAUGG.....   | 2      |
| .....UGCUCUACUGUGAAGCCACAGA.....       | 2      |
| .....CUGUGAAGCCACAGAUGGGUA.....        | 3      |
| .....GUGAAGCCACAGAUGGG.....            | 153    |
| .....GUGAAGCCACAGAUGGGU.....           | 9      |
| .....UGAAGCCACAGAUGGG.....             | 3      |
| .....UGAAGCCACAGAUGGGUAGAG.....        | 2      |
| .....CAGAUGGGUAGAGCAAGCACAG.....       | 2      |
| .....GAUGGGUAGAGCAAGC.....             | 2      |
| .....GAUGGGUAGAGCAAGCACAGUUUACCGC..... | 6      |
| .....AUGGGUAGAGCAAGCACAGUUUACCGC.....  | 8      |
| .....UGGGUAGAGCAAGCACAGUUUACCGC.....   | 8      |
| .....GGGUAGAGCAAGCACAGUUUACCGC.....    | 5      |
| .....GGUAGAGCAAGCACAGUUUACCGC.....     | 19     |
| .....GGUAGAGCAAGCACAGUUUACCGCU.....    | 2      |
| .....GUAGAGCAAGCACAGUUUACC.....        | 6      |
| .....GUAGAGCAAGCACAGUUUACCG.....       | 5      |
| .....GUAGAGCAAGCACAGUUUACCGC.....      | 45     |
| .....GUAGAGCAAGCACAGUUUACCGCU.....     | 4      |
| .....UAGAGCAAGCACAGU.....              | 2      |
| .....UAGAGCAAGCACAGUU.....             | 5      |
| .....UAGAGCAAGCACAGUUU.....            | 10     |
| .....UAGAGCAAGCACAGUUUA.....           | 55     |
| .....UAGAGCAAGCACAGUUUAC.....          | 66     |
| .....UAGAGCAAGCACAGUUUACC.....         | 458    |
| .....UAGAGCAAGCACAGUUUACCG.....        | 9605   |
| .....UAGAGCAAGCACAGUUUACCGC.....       | 189821 |

|                                |       |
|--------------------------------|-------|
| .....UAGAGCAAGCACAGUUUACCGCU.. | 13845 |
| .....UAGAGCAAGCACAGUUUACCGCUG. | 6     |
| .....UAGAGCAAGCACAGUUUACCGCUGC | 2     |
| .....AGAGCAAGCACAGUUUACC.....  | 11    |
| .....AGAGCAAGCACAGUUUACCG..... | 95    |
| .....AGAGCAAGCACAGUUUACCGC...  | 2865  |
| .....AGAGCAAGCACAGUUUACCGCU..  | 109   |
| .....GAGCAAGCACAGUUUACCG.....  | 19    |
| .....GAGCAAGCACAGUUUACCGC...   | 505   |
| .....GAGCAAGCACAGUUUACCGCU..   | 25    |
| .....AGCAAGCACAGUUUACC.....    | 4     |
| .....AGCAAGCACAGUUUACCG.....   | 17    |
| .....AGCAAGCACAGUUUACCGC...    | 272   |
| .....AGCAAGCACAGUUUACCGCU..    | 11    |
| .....GCAAGCACAGUUUACC.....     | 3     |
| .....GCAAGCACAGUUUACCG.....    | 7     |
| .....GCAAGCACAGUUUACCGC...     | 315   |
| .....GCAAGCACAGUUUACCGCU..     | 7     |
| .....CAAGCACAGUUUACCG.....     | 6     |
| .....CAAGCACAGUUUACCGC...      | 172   |
| .....CAAGCACAGUUUACCGCU..      | 32    |
| .....AAGCACAGUUUACCGC...       | 433   |
| .....AAGCACAGUUUACCGCU..       | 21    |
| .....AGCACAGUUUACCGCU..        | 20    |

**#Pri-miR-150/WCCR5**

|                                                                 | Reads  |
|-----------------------------------------------------------------|--------|
| CCUGUGUAAACUGAGCUUGCUCUAUGCUGGGCUCAGACCUAGAGCAAGCACAGUUUACCCAGG |        |
| .CUGUGUAAACUGAGCUUGCUC.....                                     | 2      |
| .UGUGUAAACUGAGCUUGCUC.....                                      | 4      |
| .UGUGUAAACUGAGCUUGCUCU.....                                     | 50     |
| .UGUGUAAACUGAGCUUGCUCUA.....                                    | 311    |
| .UGUGUAAACUGAGCUUGCUCUAU.....                                   | 33     |
| .GUGUAAACUGAGCUUGCUCUA.....                                     | 5      |
| .GUGUAAACUGAGCUUGCUCUAU.....                                    | 5      |
| .GUGUAAACUGAGCUUGCUCUAUG.....                                   | 13     |
| .UGUAAACUGAGCUUGC.....                                          | 16     |
| .UGUAAACUGAGCUUGC.....                                          | 62     |
| .UGUAAACUGAGCUUGCUC.....                                        | 59     |
| .UGUAAACUGAGCUUGCUCU.....                                       | 176    |
| .UGUAAACUGAGCUUGCUCUA.....                                      | 531    |
| .UGUAAACUGAGCUUGCUCUAU.....                                     | 28484  |
| .UGUAAACUGAGCUUGCUCUAUG.....                                    | 107017 |
| .UGUAAACUGAGCUUGCUCUAUGC.....                                   | 713    |
| .UGUAAACUGAGCUUGCUCUAUGC.....                                   | 23     |
| .UGUAAACUGAGCUUGCUCUAUGCUG.....                                 | 7      |
| .UGUAAACUGAGCUUGCUCUAUGCUGG.....                                | 2      |
| .GUAACUGAGCUUGCUC.....                                          | 3      |



|                                    |       |
|------------------------------------|-------|
| .....GUAACUGAGCUUGCUCU.....        | 4     |
| .....GUAACUGAGCUUGCUCUA.....       | 14    |
| .....GUAACUGAGCUUGCUCUAU.....      | 506   |
| .....GUAACUGAGCUUGCUCUAUG.....     | 1946  |
| .....GUAACUGAGCUUGCUCUAUGC.....    | 15    |
| .....GUAACUGAGCUUGCUCUAUGCU.....   | 4     |
| .....UAAACUGAGCUUGCUCUAU.....      | 132   |
| .....UAAACUGAGCUUGCUCUAUG.....     | 366   |
| .....UAAACUGAGCUUGCUCUAUGC.....    | 4     |
| .....AAACUGAGCUUGCUCUA.....        | 2     |
| .....AAACUGAGCUUGCUCUAU.....       | 131   |
| .....AAACUGAGCUUGCUCUAUG.....      | 467   |
| .....AACUGAGCUUGCUCUAU.....        | 55    |
| .....AACUGAGCUUGCUCUAUG.....       | 180   |
| .....ACUGAGCUUGCUCUAU.....         | 31    |
| .....ACUGAGCUUGCUCUAUG.....        | 128   |
| .....CUGAGCUUGCUCUAU.....          | 2     |
| .....CUGAGCUUGCUCUAUG.....         | 362   |
| .....CUGAGCUUGCUCUAUGC.....        | 5     |
| .....UGAGCUUGCUCUAUGC.....         | 4     |
| .....UCUAUGCUGGGCUCAGAC.....       | 2     |
| .....UAUGCUGGGCUCAGACC.....        | 2     |
| .....AUGCUGGGCUCAGACC.....         | 2     |
| .....GGGCUCAGACCUAGAG.....         | 2     |
| .....GACCUAGAGCAAGCACAGUUUACC..... | 2     |
| .....CCUAGAGCAAGCACAGUUUACCCA..... | 2     |
| .....CUAGAGCAAGCACAGUUUAC.....     | 2     |
| .....CUAGAGCAAGCACAGUUUACC.....    | 7     |
| .....CUAGAGCAAGCACAGUUUACCC.....   | 87    |
| .....CUAGAGCAAGCACAGUUUACCCA.....  | 37    |
| .....UAGAGCAAGCACAGUU.....         | 22    |
| .....UAGAGCAAGCACAGUUU.....        | 39    |
| .....UAGAGCAAGCACAGUUUA.....       | 59    |
| .....UAGAGCAAGCACAGUUUAC.....      | 559   |
| .....UAGAGCAAGCACAGUUUACC.....     | 1815  |
| .....UAGAGCAAGCACAGUUUACCC.....    | 20353 |
| .....UAGAGCAAGCACAGUUUACCCA.....   | 51463 |
| .....UAGAGCAAGCACAGUUUACCCAG.....  | 16    |
| .....AGAGCAAGCACAGUUUA.....        | 2     |
| .....AGAGCAAGCACAGUUUACC.....      | 13    |
| .....AGAGCAAGCACAGUUUACCC.....     | 129   |
| .....AGAGCAAGCACAGUUUACCCA.....    | 355   |
| .....GAGCAAGCACAGUUUACC.....       | 3     |
| .....GAGCAAGCACAGUUUACCC.....      | 39    |
| .....GAGCAAGCACAGUUUACCCA.....     | 102   |
| .....GAGCAAGCACAGUUUACCCAG.....    | 2     |
| .....GAGCAAGCACAGUUUACCCAGG.....   | 5     |

|                              |    |
|------------------------------|----|
| .....AGCAAGCACAGUUUACC.....  | 3  |
| .....AGCAAGCACAGUUUACCC..... | 12 |
| .....AGCAAGCACAGUUUACCCA..   | 43 |
| .....GCAAGCACAGUUUACCC.....  | 18 |
| .....GCAAGCACAGUUUACCCA..    | 44 |
| .....CAAGCACAGUUUACCC.....   | 4  |
| .....CAAGCACAGUUUACCCA..     | 25 |
| .....AAGCACAGUUUACCCA..      | 37 |

**#cshR-rluc-1**

|                                                                     | Reads |
|---------------------------------------------------------------------|-------|
| GUUAGGUCGUACACCUUGGAAGCCCUGUGAAGCCACAGAUGGGGCUUCCAAGGUGUACGACCUUUUU |       |
| GUUAGGUCGUACACCUUGGAAGC.....                                        | 2     |
| .UUAGGUCGUACACCUUGGAAGC.....                                        | 2     |
| .UUAGGUCGUACACCUUGGAAGCC.....                                       | 3     |
| .UAGGUCGUACACCUUGGAAG.....                                          | 4     |
| .UAGGUCGUACACCUUGGAAGC.....                                         | 14    |
| .UAGGUCGUACACCUUGGAAGCC.....                                        | 51    |
| .UAGGUCGUACACCUUGGAAGCCC.....                                       | 4     |
| . .AGGUCGUACACCUUGG.....                                            | 350   |
| . .AGGUCGUACACCUUGGA.....                                           | 452   |
| . .AGGUCGUACACCUUGGAA.....                                          | 996   |
| . .AGGUCGUACACCUUGGAAG.....                                         | 2122  |
| . .AGGUCGUACACCUUGGAAGC.....                                        | 6639  |
| . .AGGUCGUACACCUUGGAAGCC.....                                       | 45579 |
| . .AGGUCGUACACCUUGGAAGCCC.....                                      | 39123 |
| . .AGGUCGUACACCUUGGAAGCCCU.....                                     | 11542 |
| . .AGGUCGUACACCUUGGAAGCCCUG.....                                    | 163   |
| . .AGGUCGUACACCUUGGAAGCCCUGU.....                                   | 10    |
| . .AGGUCGUACACCUUGGAAGCCCUGUG.....                                  | 4     |
| . .AGGUCGUACACCUUGGAAGCCCUGUGA.....                                 | 2     |
| . . .GGUCGUACACCUUGGA.....                                          | 62    |
| . . .GGUCGUACACCUUGGAA.....                                         | 91    |
| . . .GGUCGUACACCUUGGAAG.....                                        | 62    |
| . . .GGUCGUACACCUUGGAAGC.....                                       | 171   |
| . . .GGUCGUACACCUUGGAAGCC.....                                      | 1845  |
| . . .GGUCGUACACCUUGGAAGCCC.....                                     | 1935  |
| . . .GGUCGUACACCUUGGAAGCCCU.....                                    | 332   |
| . . .GGUCGUACACCUUGGAAGCCCUG.....                                   | 40    |
| . . . .GUCGUACACCUUGGAA.....                                        | 25    |
| . . . .GUCGUACACCUUGGAAG.....                                       | 37    |
| . . . .GUCGUACACCUUGGAAGC.....                                      | 65    |
| . . . .GUCGUACACCUUGGAAGCC.....                                     | 310   |
| . . . .GUCGUACACCUUGGAAGCCC.....                                    | 1083  |
| . . . .GUCGUACACCUUGGAAGCCCU.....                                   | 743   |
| . . . .GUCGUACACCUUGGAAGCCCUG.....                                  | 38    |
| . . . .GUCGUACACCUUGGAAGCCCUGU.....                                 | 4     |
| . . . .UCGUACACCUUGGAAG.....                                        | 7     |

|                                         |     |
|-----------------------------------------|-----|
| .....UCGUACACCUUGGAAGC.....             | 19  |
| .....UCGUACACCUUGGAAGCC.....            | 94  |
| .....UCGUACACCUUGGAAGCCC.....           | 98  |
| .....UCGUACACCUUGGAAGCCCU.....          | 34  |
| .....UCGUACACCUUGGAAGCCCUG.....         | 8   |
| .....UCGUACACCUUGGAAGCCCUGU.....        | 12  |
| .....CGUACACCUUGGAAGC.....              | 9   |
| .....CGUACACCUUGGAAGCC.....             | 200 |
| .....CGUACACCUUGGAAGCCC.....            | 218 |
| .....CGUACACCUUGGAAGCCCU.....           | 46  |
| .....CGUACACCUUGGAAGCCCUG.....          | 7   |
| .....CGUACACCUUGGAAGCCCUGU.....         | 4   |
| .....GUACACCUUGGAAGCC.....              | 62  |
| .....GUACACCUUGGAAGCCC.....             | 120 |
| .....GUACACCUUGGAAGCCCU.....            | 23  |
| .....GUACACCUUGGAAGCCCUG.....           | 24  |
| .....GUACACCUUGGAAGCCCUGU.....          | 8   |
| .....GUACACCUUGGAAGCCCUGUG.....         | 3   |
| .....GUACACCUUGGAAGCCCUGUGAA.....       | 2   |
| .....GUACACCUUGGAAGCCCUGUGAAGCC.....    | 2   |
| .....UACACCUUGGAAGCCC.....              | 18  |
| .....UACACCUUGGAAGCCCU.....             | 8   |
| .....UACACCUUGGAAGCCCUG.....            | 6   |
| .....UACACCUUGGAAGCCCUGU.....           | 2   |
| .....UACACCUUGGAAGCCCUGUG.....          | 2   |
| .....UACACCUUGGAAGCCCUGUGAA.....        | 2   |
| .....ACACCUUGGAAGCCCU.....              | 9   |
| .....ACACCUUGGAAGCCCUG.....             | 12  |
| .....ACACCUUGGAAGCCCUGU.....            | 9   |
| .....CACCUUGGAAGCCCUG.....              | 5   |
| .....ACCUUGGAAGCCCUGUGAAGCCA.....       | 2   |
| .....ACCUUGGAAGCCCUGUGAAGCCAC.....      | 4   |
| .....CCUUGGAAGCCCUGUG.....              | 2   |
| .....CCUUGGAAGCCCUGUGA.....             | 3   |
| .....CCUUGGAAGCCCUGUGAAGCCA.....        | 2   |
| .....CCUUGGAAGCCCUGUGAAGCCACAG.....     | 2   |
| .....CCUUGGAAGCCCUGUGAAGCCACAGA.....    | 4   |
| .....UUGGAAGCCCUGUGAA.....              | 6   |
| .....UUGGAAGCCCUGUGAAG.....             | 9   |
| .....UUGGAAGCCCUGUGAAGCC.....           | 2   |
| .....UUGGAAGCCCUGUGAAGCCA.....          | 9   |
| .....UUGGAAGCCCUGUGAAGCCACAGAUGG.....   | 2   |
| .....UUGGAAGCCCUGUGAAGCCACAGAUGGGG..... | 3   |
| .....UGGAAGCCCUGUGAAG.....              | 5   |
| .....UGGAAGCCCUGUGAAGCC.....            | 10  |
| .....UGGAAGCCCUGUGAAGCCA.....           | 3   |
| .....UGGAAGCCCUGUGAAGCCAC.....          | 3   |

|                                          |      |
|------------------------------------------|------|
| .....UGGAAGCCCUGUGAAGCCACAGAUGG.....     | 6    |
| .....UGGAAGCCCUGUGAAGCCACAGAUGGGG.....   | 10   |
| .....UGGAAGCCCUGUGAAGCCACAGAUGGGGG.....  | 2    |
| .....GAAGCCCUGUGAAGCCACAGAUGGGGG.....    | 2    |
| .....GCCUGUGAAGCCACAGA.....              | 3    |
| .....GCCUGUGAAGCCACAGAUGG.....           | 2    |
| .....CCUGUGAAGCCACAGA.....               | 3    |
| .....CCUGUGAAGCCACAGAUGG.....            | 2    |
| .....CCUGUGAAGCCACAGAUGGG.....           | 2    |
| .....CCUGUGAAGCCACAGAUGGGG.....          | 2    |
| .....CCUGUGAAGCCACAGAUGGGGG.....         | 2    |
| .....CCUGUGAAGCCACAGAUGGGGGC.....        | 17   |
| .....CUGUGAAGCCACAGAUGG.....             | 8    |
| .....CUGUGAAGCCACAGAUGGG.....            | 3    |
| .....CUGUGAAGCCACAGAUGGGG.....           | 2    |
| .....CUGUGAAGCCACAGAUGGGGG.....          | 1579 |
| .....UGUGAAGCCACAGAUG.....               | 2    |
| .....UGUGAAGCCACAGAUGG.....              | 9    |
| .....UGUGAAGCCACAGAUGGG.....             | 10   |
| .....UGUGAAGCCACAGAUGGGG.....            | 1012 |
| .....UGUGAAGCCACAGAUGGGGG.....           | 54   |
| .....UGUGAAGCCACAGAUGGGGGC.....          | 2    |
| .....GUGAAGCCACAGAUGGG.....              | 4    |
| .....GUGAAGCCACAGAUGGGG.....             | 13   |
| .....GUGAAGCCACAGAUGGGGG.....            | 15   |
| .....UGAAGCCACAGAUGGG.....               | 2    |
| .....UGAAGCCACAGAUGGGG.....              | 4    |
| .....UGAAGCCACAGAUGGGGG.....             | 4    |
| .....GAAGCCACAGAUGGGG.....               | 3    |
| .....GAAGCCACAGAUGGGGG.....              | 16   |
| .....AAGCCACAGAUGGGGG.....               | 13   |
| .....AAGCCACAGAUGGGGGC.....              | 2    |
| .....CCACAGAUGGGGGCUUCCAAGG.....         | 2    |
| .....CCACAGAUGGGGGCUUCCAAGGUG.....       | 2    |
| .....CCACAGAUGGGGGCUUCCAAGGUGUACG.....   | 2    |
| .....CCACAGAUGGGGGCUUCCAAGGUGUACGA.....  | 2    |
| .....CACAGAUGGGGGCUUC.....               | 2    |
| .....CACAGAUGGGGGCUUCCAAGGUGUACG.....    | 2    |
| .....CACAGAUGGGGGCUUCCAAGGUGUACGA.....   | 2    |
| .....GAUGGGGGCUUCCAAGG.....              | 2    |
| .....GAUGGGGGCUUCCAAGGUGUACGACCUUU.....  | 3    |
| .....AUGGGGGCUUCCAAGG.....               | 7    |
| .....AUGGGGGCUUCCAAGGUGUACGACCUU.....    | 2    |
| .....AUGGGGGCUUCCAAGGUGUACGACCUUU.....   | 2    |
| .....AUGGGGGCUUCCAAGGUGUACGACCUUUUU..... | 2    |
| .....UGGGGGCUUCCAAGGU.....               | 7    |
| .....UGGGGGCUUCCAAGGUGUACGACC.....       | 6    |

|                                    |        |
|------------------------------------|--------|
| .....UGGGGGCUUCCAAGGUGUACGACCUU... | 5      |
| .....UGGGGGCUUCCAAGGUGUACGACCUUU.. | 13     |
| .....UGGGGGCUUCCAAGGUGUACGACCUUUU. | 8      |
| .....UGGGGGCUUCCAAGGUGUACGACCUUUUU | 2      |
| .....GGGGGCUUCCAAGGUGUACG.....     | 2      |
| .....GGGGGCUUCCAAGGUGUACGA.....    | 2      |
| .....GGGGGCUUCCAAGGUGUACGACC.....  | 3      |
| .....GGGGGCUUCCAAGGUGUACGACCU....  | 2      |
| .....GGGGGCUUCCAAGGUGUACGACCUU...  | 5      |
| .....GGGGGCUUCCAAGGUGUACGACCUUU..  | 4      |
| .....GGGGCUUCCAAGGUGUACG.....      | 2      |
| .....GGGGCUUCCAAGGUGUACGA.....     | 8      |
| .....GGGGCUUCCAAGGUGUACGAC.....    | 4      |
| .....GGGGCUUCCAAGGUGUACGACC.....   | 53     |
| .....GGGGCUUCCAAGGUGUACGACCU....   | 24     |
| .....GGGGCUUCCAAGGUGUACGACCUU...   | 5      |
| .....GGGGCUUCCAAGGUGUACGACCUUU..   | 6      |
| .....GGGGCUUCCAAGGUGUACG.....      | 11     |
| .....GGGGCUUCCAAGGUGUACGACCU....   | 3      |
| .....GGGGCUUCCAAGGUGUACGACCUU...   | 9      |
| .....GGGGCUUCCAAGGUGUACGACCUUU..   | 16     |
| .....GGGGCUUCCAAGGUGUACGACCUUUU.   | 2      |
| .....GGGGCUUCCAAGGUGUAC.....       | 2      |
| .....GGGGCUUCCAAGGUGUACG.....      | 4      |
| .....GGGGCUUCCAAGGUGUACGA.....     | 24     |
| .....GGGGCUUCCAAGGUGUACGAC.....    | 2      |
| .....GGGGCUUCCAAGGUGUACGACC.....   | 304    |
| .....GGGGCUUCCAAGGUGUACGACCU...    | 355    |
| .....GGGGCUUCCAAGGUGUACGACCUU...   | 467    |
| .....GGGGCUUCCAAGGUGUACGACCUUU..   | 311    |
| .....GGGGCUUCCAAGGUGUACGACCUUUU.   | 59     |
| .....GGGGCUUCCAAGGUGUACGACCUUUUU   | 9      |
| .....GGGGCUUCCAAGGUGUAC.....       | 2      |
| .....GGGGCUUCCAAGGUGUACG.....      | 49     |
| .....GGGGCUUCCAAGGUGUACGA.....     | 752    |
| .....GGGGCUUCCAAGGUGUACGAC.....    | 813    |
| .....GGGGCUUCCAAGGUGUACGACC.....   | 1780   |
| .....GGGGCUUCCAAGGUGUACGACCU....   | 2636   |
| .....GGGGCUUCCAAGGUGUACGACCUU...   | 34615  |
| .....GGGGCUUCCAAGGUGUACGACCUUU..   | 105746 |
| .....GGGGCUUCCAAGGUGUACGACCUUUU.   | 18252  |
| .....GGGGCUUCCAAGGUGUACGACCUUUUU   | 2092   |
| .....GGGGCUUCCAAGGUGUACG.....      | 2      |
| .....GGGGCUUCCAAGGUGUACGA.....     | 636    |
| .....GGGGCUUCCAAGGUGUACGAC.....    | 1672   |
| .....GGGGCUUCCAAGGUGUACGACC.....   | 2962   |
| .....GGGGCUUCCAAGGUGUACGACCU...    | 2174   |

|                               |        |
|-------------------------------|--------|
| .....CUUCCAAGGUGUACGACCUU...  | 53505  |
| .....CUUCCAAGGUGUACGACCUUU..  | 187958 |
| .....CUUCCAAGGUGUACGACCUUUU.. | 44673  |
| .....CUUCCAAGGUGUACGACCUUUUU  | 4919   |
| .....UUCCAAGGUGUACGAC.....    | 53     |
| .....UUCCAAGGUGUACGACC.....   | 187    |
| .....UUCCAAGGUGUACGACCU....   | 244    |
| .....UUCCAAGGUGUACGACCUU...   | 3552   |
| .....UUCCAAGGUGUACGACCUUU..   | 11907  |
| .....UUCCAAGGUGUACGACCUUUU..  | 2780   |
| .....UUCCAAGGUGUACGACCUUUUU   | 388    |
| .....UCCAAGGUGUACGACC.....    | 50     |
| .....UCCAAGGUGUACGACCU....    | 88     |
| .....UCCAAGGUGUACGACCUU...    | 1580   |
| .....UCCAAGGUGUACGACCUUU..    | 4087   |
| .....UCCAAGGUGUACGACCUUUU..   | 876    |
| .....UCCAAGGUGUACGACCUUUUU    | 109    |
| .....CCAAGGUGUACGACCU....     | 32     |
| .....CCAAGGUGUACGACCUU...     | 324    |
| .....CCAAGGUGUACGACCUUU..     | 1434   |
| .....CCAAGGUGUACGACCUUUU..    | 302    |
| .....CCAAGGUGUACGACCUUUUU     | 47     |
| .....CAAGGUGUACGACCUU....     | 203    |
| .....CAAGGUGUACGACCUUU..      | 1069   |
| .....CAAGGUGUACGACCUUUU..     | 219    |
| .....CAAGGUGUACGACCUUUUU      | 28     |
| .....AAGGUGUACGACCUUU..       | 524    |
| .....AAGGUGUACGACCUUUU..      | 117    |
| .....AAGGUGUACGACCUUUUU       | 11     |
| .....AGGUGUACGACCUUU..        | 2      |
| .....AGGUGUACGACCUUUU..       | 16     |
| .....AGGUGUACGACCUUUUU        | 3      |

**#cshR-rluc-20**

|                                                                    |       |
|--------------------------------------------------------------------|-------|
| GUUAAUGCGUUUGCGUUGCUCGGGCUGUGAAGCCACAGAUGGGCCCAGCAACGCAAACGCAUUUUU | Reads |
| GUUAAUGCGUUUGCGUUGCUCGG.....                                       | 3     |
| .UUAUGCGUUUGCGUUGCUCGG.....                                        | 2     |
| ..UAAUGCGUUUGCGUUGCUCGG.....                                       | 5     |
| ...UAAUGCGUUUGCGUUGCUCGG.....                                      | 15    |
| ...UAAUGCGUUUGCGUUGCUCGGGC.....                                    | 5     |
| ...AAUGCGUUUGCGUUGC.....                                           | 99    |
| ...AAUGCGUUUGCGUUGC.....                                           | 76    |
| ...AAUGCGUUUGCGUUGCUC.....                                         | 202   |
| ...AAUGCGUUUGCGUUGCUCG.....                                        | 278   |
| ...AAUGCGUUUGCGUUGCUCGG.....                                       | 4670  |
| ...AAUGCGUUUGCGUUGCUCGGG.....                                      | 23413 |
| ...AAUGCGUUUGCGUUGCUCGGGC.....                                     | 31252 |

|                                   |       |
|-----------------------------------|-------|
| ...AAUGC GUUUGC GUUGCUCGGGCU..... | 10476 |
| ...AAUGC GUUUGC GUUGCUCGGGCU..... | 44    |
| ...AAUGC GUUUGC GUUGCUCGGGCU..... | 20    |
| ...AAUGC GUUUGC GUUGCUCGGGCU..... | 6     |
| ...AAUGC GUUUGC GUUGCUCGGGCU..... | 3     |
| ...AAUGC GUUUGC GUUGCUCGGGCU..... | 5     |
| ...AUGC GUUUGC GUUGCUC.....       | 11    |
| ...AUGC GUUUGC GUUGCUC.....       | 23    |
| ...AUGC GUUUGC GUUGCUC.....       | 24    |
| ...AUGC GUUUGC GUUGCUC.....       | 316   |
| ...AUGC GUUUGC GUUGCUC.....       | 544   |
| ...AUGC GUUUGC GUUGCUC.....       | 1012  |
| ...AUGC GUUUGC GUUGCUC.....       | 1047  |
| ...AUGC GUUUGC GUUGCUC.....       | 4     |
| ...AUGC GUUUGC GUUGCUC.....       | 5     |
| ...UGC GUUUGC GUUGCUC.....        | 26    |
| ...UGC GUUUGC GUUGCUC.....        | 4     |
| ...UGC GUUUGC GUUGCUC.....        | 75    |
| ...UGC GUUUGC GUUGCUC.....        | 199   |
| ...UGC GUUUGC GUUGCUC.....        | 386   |
| ...UGC GUUUGC GUUGCUC.....        | 673   |
| ...UGC GUUUGC GUUGCUC.....        | 27    |
| ...UGC GUUUGC GUUGCUC.....        | 19    |
| ...UGC GUUUGC GUUGCUC.....        | 2     |
| ...GCGUUUGC GUUGCUC.....          | 9     |
| ...GCGUUUGC GUUGCUC.....          | 102   |
| ...GCGUUUGC GUUGCUC.....          | 191   |
| ...GCGUUUGC GUUGCUC.....          | 374   |
| ...GCGUUUGC GUUGCUC.....          | 348   |
| ...GCGUUUGC GUUGCUC.....          | 411   |
| ...GCGUUUGC GUUGCUC.....          | 18    |
| ...CGUUUGC GUUGCUC.....           | 11    |
| ...CGUUUGC GUUGCUC.....           | 38    |
| ...CGUUUGC GUUGCUC.....           | 67    |
| ...CGUUUGC GUUGCUC.....           | 33    |
| ...CGUUUGC GUUGCUC.....           | 19    |
| ...CGUUUGC GUUGCUC.....           | 7     |
| ...CGUUUGC GUUGCUC.....           | 4     |
| ...CGUUUGC GUUGCUC.....           | 2     |
| ...GUUUUGC GUUGCUC.....           | 89    |
| ...GUUUUGC GUUGCUC.....           | 142   |
| ...GUUUUGC GUUGCUC.....           | 63    |
| ...GUUUUGC GUUGCUC.....           | 30    |
| ...GUUUUGC GUUGCUC.....           | 3     |
| ...GUUUUGC GUUGCUC.....           | 5     |
| ...UUUGC GUUGCUC.....             | 49    |
| ...UUUGC GUUGCUC.....             | 33    |

|                                      |      |
|--------------------------------------|------|
| .....UUUGCUGUUCUCGGGCUG.....         | 44   |
| .....UUUGCUGUUCUCGGGCUGU.....        | 3    |
| .....UUUGCUGUUCUCGGGCUGUG.....       | 6    |
| .....UUUGCUGUUCUCGGGCUGUGA.....      | 2    |
| .....UUUGCUGUUCUCGGGCUGUGAAG.....    | 7    |
| .....UUUGCUGUUCUCGGGCUGUGAAGC.....   | 2    |
| .....UUGCUGUUCUCGGGCUG.....          | 43   |
| .....UUGCUGUUCUCGGGCUG.....          | 74   |
| .....UUGCUGUUCUCGGGCUGU.....         | 10   |
| .....UUGCUGUUCUCGGGCUGUG.....        | 10   |
| .....UUGCUGUUCUCGGGCUGUGA.....       | 3    |
| .....UUGCUGUUCUCGGGCUGUGAAG.....     | 2    |
| .....UUGCUGUUCUCGGGCUGUGAAGC.....    | 5    |
| .....UUGCUGUUCUCGGGCUGUGAAGCC.....   | 2    |
| .....UGCUGUUCUCGGGCUG.....           | 24   |
| .....GCGUUCUCUCGGGCUGU.....          | 3    |
| .....GCGUUCUCUCGGGCUGUG.....         | 5    |
| .....CGUUCUCUCGGGCUGUG.....          | 4    |
| .....CGUUCUCUCGGGCUGUGA.....         | 8    |
| .....CGUUCUCUCGGGCUGUGAAG.....       | 3    |
| .....UUGCUCGGGCUGUGAAG.....          | 7    |
| .....UUGCUCGGGCUGUGAAGCC.....        | 6    |
| .....UUGCUCGGGCUGUGAAGCCA.....       | 5    |
| .....UUGCUCGGGCUGUGAAGCCAC.....      | 4    |
| .....GCUCGGGCUGUGAAGCCA.....         | 3    |
| .....CUCGGGCUGUGAAGCCA.....          | 2    |
| .....CGGGCUGUGAAGCCAC.....           | 6    |
| .....CGGGCUGUGAAGCCACAGAU.....       | 2    |
| .....GCUGUGAAGCCACAGAUGGGC.....      | 4    |
| .....GCUGUGAAGCCACAGAUGGGCC.....     | 4    |
| .....GCUGUGAAGCCACAGAUGGGCCC.....    | 2    |
| .....GCUGUGAAGCCACAGAUGGGCCCGAG..... | 2    |
| .....CUGUGAAGCCACAGAUGG.....         | 6    |
| .....CUGUGAAGCCACAGAUGGG.....        | 3    |
| .....CUGUGAAGCCACAGAUGGGC.....       | 19   |
| .....CUGUGAAGCCACAGAUGGGCC.....      | 6917 |
| .....CUGUGAAGCCACAGAUGGGCCCGAG.....  | 3    |
| .....UGUGAAGCCACAGAUGG.....          | 7    |
| .....UGUGAAGCCACAGAUGGG.....         | 5    |
| .....UGUGAAGCCACAGAUGGGC.....        | 761  |
| .....UGUGAAGCCACAGAUGGGCC.....       | 99   |
| .....UGUGAAGCCACAGAUGGGCCCGA.....    | 2    |
| .....UGUGAAGCCACAGAUGGGCCCGAG.....   | 15   |
| .....UGUGAAGCCACAGAUGGGCCCGAGC.....  | 14   |
| .....UGUGAAGCCACAGAUGGGCCCGAGCA..... | 3    |
| .....GUGAAGCCACAGAUGG.....           | 7    |
| .....GUGAAGCCACAGAUGGG.....          | 20   |



|                                         |    |
|-----------------------------------------|----|
| .....GUGAAGCCACAGAUGGGC.....            | 13 |
| .....GUGAAGCCACAGAUGGGCC.....           | 43 |
| .....GUGAAGCCACAGAUGGGCCC.....          | 2  |
| .....GUGAAGCCACAGAUGGGCCCGA.....        | 3  |
| .....GUGAAGCCACAGAUGGGCCCAG.....        | 9  |
| .....GUGAAGCCACAGAUGGGCCCAGC.....       | 3  |
| .....UGAAGCCACAGAUGGG.....              | 5  |
| .....UGAAGCCACAGAUGGGC.....             | 5  |
| .....UGAAGCCACAGAUGGGCC.....            | 17 |
| .....UGAAGCCACAGAUGGGCCC.....           | 7  |
| .....UGAAGCCACAGAUGGGCCCAG.....         | 4  |
| .....UGAAGCCACAGAUGGGCCCAG.....         | 2  |
| .....UGAAGCCACAGAUGGGCCCAGCA.....       | 3  |
| .....UGAAGCCACAGAUGGGCCCAGCAA.....      | 3  |
| .....GAAGCCACAGAUGGGC.....              | 3  |
| .....GAAGCCACAGAUGGGCC.....             | 30 |
| .....AAGCCACAGAUGGGCC.....              | 28 |
| .....AGCCACAGAUGGGCCCAGCAACG.....       | 4  |
| .....GCCACAGAUGGGCCCAGCAAC.....         | 2  |
| .....CCACAGAUGGGCCCAGCAACG.....         | 17 |
| .....CCACAGAUGGGCCCAGCAACGCAAA.....     | 5  |
| .....CCACAGAUGGGCCCAGCAACGCAAAC.....    | 3  |
| .....CCACAGAUGGGCCCAGCAACGCAAACG.....   | 3  |
| .....CACAGAUGGGCCCAG.....               | 2  |
| .....CACAGAUGGGCCCAGCAACG.....          | 13 |
| .....CACAGAUGGGCCCAGCAACGCAA.....       | 3  |
| .....CACAGAUGGGCCCAGCAACGCAAAC.....     | 2  |
| .....CACAGAUGGGCCCAGCAACGCAAACG.....    | 4  |
| .....ACAGAUGGGCCCAGCAACGCAAACG.....     | 2  |
| .....CAGAUGGGCCCAGCA.....               | 2  |
| .....CAGAUGGGCCCAGCAA.....              | 3  |
| .....CAGAUGGGCCCAGCAACGCAAACG.....      | 4  |
| .....CAGAUGGGCCCAGCAACGCAAACGCAUU.....  | 3  |
| .....CAGAUGGGCCCAGCAACGCAAACGCAUUU..... | 5  |
| .....AGAUGGGCCCAGCAACGCAAA.....         | 2  |
| .....AGAUGGGCCCAGCAACGCAAAC.....        | 2  |
| .....AGAUGGGCCCAGCAACGCAAACG.....       | 2  |
| .....AGAUGGGCCCAGCAACGCAAACGCAUUU.....  | 2  |
| .....AGAUGGGCCCAGCAACGCAAACGCAUUUU..... | 4  |
| .....GAUGGGCCCAGCAACG.....              | 2  |
| .....GAUGGGCCCAGCAACGCAAACGCAUUU.....   | 4  |
| .....AUGGGCCCAGCAACG.....               | 16 |
| .....AUGGGCCCAGCAACGC.....              | 7  |
| .....AUGGGCCCAGCAACGCAA.....            | 5  |
| .....AUGGGCCCAGCAACGCAAA.....           | 4  |
| .....AUGGGCCCAGCAACGCAAACGCA.....       | 2  |
| .....AUGGGCCCAGCAACGCAAACGCAUU.....     | 3  |

|                                   |      |
|-----------------------------------|------|
| .....AUGGGCCCAGCAACGCAAACGCAUUU.. | 3    |
| .....AUGGGCCCAGCAACGCAAACGCAUUUU. | 7    |
| .....UGGGCCCAGCAACGC.....         | 14   |
| .....UGGGCCCAGCAACGCAA.....       | 11   |
| .....UGGGCCCAGCAACGCAAAA.....     | 2    |
| .....UGGGCCCAGCAACGCAAAC.....     | 2    |
| .....UGGGCCCAGCAACGCAAACGCA.....  | 7    |
| .....UGGGCCCAGCAACGCAAACGCAU..... | 4    |
| .....UGGGCCCAGCAACGCAAACGCAUU..   | 6    |
| .....UGGGCCCAGCAACGCAAACGCAUUU..  | 10   |
| .....UGGGCCCAGCAACGCAAACGCAUUUU.. | 23   |
| .....UGGGCCCAGCAACGCAAACGCAUUUUU  | 8    |
| .....GGGCCCAGCAACGCAA.....        | 2    |
| .....GGGCCCAGCAACGCAAACG.....     | 3    |
| .....GGGCCCAGCAACGCAAACGCA.....   | 4    |
| .....GGGCCCAGCAACGCAAACGCAU.....  | 3    |
| .....GGGCCCAGCAACGCAAACGCAUUU..   | 2    |
| .....GGGCCCAGCAACGCAAACGCAUUUU..  | 9    |
| .....GGCCCGAGCAACGCAA.....        | 22   |
| .....GGCCCGAGCAACGCAAAA.....      | 2    |
| .....GGCCCGAGCAACGCAAAC.....      | 2    |
| .....GGCCCGAGCAACGCAAACGCA.....   | 49   |
| .....GGCCCGAGCAACGCAAACGCAU.....  | 3    |
| .....GGCCCGAGCAACGCAAACGCAUUU..   | 4    |
| .....GGCCCGAGCAACGCAAACGCAUUUUU   | 2    |
| .....GCCCGAGCAACGCAAACG.....      | 6    |
| .....GCCCGAGCAACGCAAACGC.....     | 3    |
| .....GCCCGAGCAACGCAAACGCA.....    | 59   |
| .....GCCCGAGCAACGCAAACGCAU.....   | 21   |
| .....GCCCGAGCAACGCAAACGCAUU..     | 109  |
| .....GCCCGAGCAACGCAAACGCAUUU..    | 37   |
| .....GCCCGAGCAACGCAAACGCAUUUU..   | 25   |
| .....GCCCGAGCAACGCAAACGCAUUUUU    | 10   |
| .....CCCGAGCAACGCAAAC.....        | 13   |
| .....CCCGAGCAACGCAAACG.....       | 48   |
| .....CCCGAGCAACGCAAACGC.....      | 31   |
| .....CCCGAGCAACGCAAACGCA.....     | 331  |
| .....CCCGAGCAACGCAAACGCAU.....    | 620  |
| .....CCCGAGCAACGCAAACGCAUU..      | 2813 |
| .....CCCGAGCAACGCAAACGCAUUU..     | 5227 |
| .....CCCGAGCAACGCAAACGCAUUUU..    | 2923 |
| .....CCCGAGCAACGCAAACGCAUUUUU     | 436  |
| .....CCGAGCAACGCAAACG.....        | 123  |
| .....CCGAGCAACGCAAACGC.....       | 231  |
| .....CCGAGCAACGCAAACGCA.....      | 916  |
| .....CCGAGCAACGCAAACGCAU.....     | 1635 |
| .....CCGAGCAACGCAAACGCAUU..       | 1497 |

|                              |        |
|------------------------------|--------|
| .....CCGAGCAACGCAAACGCAUUU.. | 27043  |
| .....CCGAGCAACGCAAACGCAUUUU. | 44253  |
| .....CCGAGCAACGCAAACGCAUUUUU | 6647   |
| .....CGAGCAACGCAAACGC.....   | 124    |
| .....CGAGCAACGCAAACGCA.....  | 1991   |
| .....CGAGCAACGCAAACGCAU....  | 959    |
| .....CGAGCAACGCAAACGCAUU...  | 1402   |
| .....CGAGCAACGCAAACGCAUUU..  | 29782  |
| .....CGAGCAACGCAAACGCAUUUU.  | 146453 |
| .....CGAGCAACGCAAACGCAUUUUU  | 34252  |
| .....GAGCAACGCAAACGCA.....   | 225    |
| .....GAGCAACGCAAACGCAU....   | 49     |
| .....GAGCAACGCAAACGCAUU...   | 72     |
| .....GAGCAACGCAAACGCAUUU..   | 861    |
| .....GAGCAACGCAAACGCAUUUU.   | 3193   |
| .....GAGCAACGCAAACGCAUUUUU   | 741    |
| .....AGCAACGCAAACGCAU....    | 3      |
| .....AGCAACGCAAACGCAUU...    | 20     |
| .....AGCAACGCAAACGCAUUU..    | 108    |
| .....AGCAACGCAAACGCAUUUU.    | 390    |
| .....AGCAACGCAAACGCAUUUUU    | 84     |
| .....GCAACGCAAACGCAUU...     | 11     |
| .....GCAACGCAAACGCAUUU..     | 91     |
| .....GCAACGCAAACGCAUUUU.     | 346    |
| .....GCAACGCAAACGCAUUUUU     | 73     |
| .....CAACGCAAACGCAUUU..      | 90     |
| .....CAACGCAAACGCAUUUU.      | 380    |
| .....CAACGCAAACGCAUUUUU      | 95     |
| .....AACGCAAACGCAUUUU.       | 830    |
| .....AACGCAAACGCAUUUUU       | 252    |
| .....ACGCAAACGCAUUUU.        | 2      |
| .....ACGCAAACGCAUUUUU        | 30     |

**#cshR-rluc-123**

|                                                                    |       |
|--------------------------------------------------------------------|-------|
| GUUAAAUCACGGCGUUCUCGGCGUCUGUGAAGCCACAGAUGGGACGCCGAGAACGCCGUGAUUUUU | Reads |
| GUUAAAUCACGGCGUUCUCGGCGUC.....                                     | 2     |
| .UUAAAUCACGGCGUUCUCGGCGUC.....                                     | 6     |
| .UUAAAUCACGGCGUUCUCGGCGUC.....                                     | 3     |
| ..UAAAUCACGGCGUUCUCGGCG.....                                       | 3     |
| ..UAAAUCACGGCGUUCUCGGCGU.....                                      | 13    |
| ..UAAAUCACGGCGUUCUCGGCGUC.....                                     | 20    |
| ..UAAAUCACGGCGUUCUCGGCGUCU.....                                    | 4     |
| ...AAAUCACGGCGUUCU.....                                            | 3     |
| ...AAAUCACGGCGUUCUC.....                                           | 96    |
| ...AAAUCACGGCGUUCUCG.....                                          | 516   |
| ...AAAUCACGGCGUUCUCGG.....                                         | 1623  |
| ...AAAUCACGGCGUUCUCGGC.....                                        | 936   |

|                                      |        |
|--------------------------------------|--------|
| ...AAAUCACGGCGUUCUCGGCG...           | 4562   |
| ...AAAUCACGGCGUUCUCGGCGU...          | 30692  |
| ...AAAUCACGGCGUUCUCGGCGUC...         | 290887 |
| ...AAAUCACGGCGUUCUCGGCGUCU...        | 46309  |
| ...AAAUCACGGCGUUCUCGGCGUCUG...       | 100    |
| ...AAAUCACGGCGUUCUCGGCGUCUGU...      | 47     |
| ...AAAUCACGGCGUUCUCGGCGUCUGUG...     | 7      |
| ...AAAUCACGGCGUUCUCGGCGUCUGUGA...    | 4      |
| ...AAAUCACGGCGUUCUCGGCGUCUGUGAAG...  | 2      |
| ...AAAUCACGGCGUUCUCGGCGUCUGUGAAGC... | 6      |
| ...AAUCACGGCGUUCUCG...               | 13     |
| ...AAUCACGGCGUUCUCGG...              | 51     |
| ...AAUCACGGCGUUCUCGGC...             | 57     |
| ...AAUCACGGCGUUCUCGGCG...            | 222    |
| ...AAUCACGGCGUUCUCGGCGU...           | 922    |
| ...AAUCACGGCGUUCUCGGCGUC...          | 8677   |
| ...AAUCACGGCGUUCUCGGCGUCU...         | 3298   |
| ...AAUCACGGCGUUCUCGGCGUCUG...        | 30     |
| ...AAUCACGGCGUUCUCGGCGUCUGU...       | 11     |
| ...AAUCACGGCGUUCUCGGCGUCUGUG...      | 2      |
| ...AUCACGGCGUUCUCGG...               | 24     |
| ...AUCACGGCGUUCUCGGC...              | 24     |
| ...AUCACGGCGUUCUCGGCG...             | 157    |
| ...AUCACGGCGUUCUCGGCGU...            | 637    |
| ...AUCACGGCGUUCUCGGCGUC...           | 3654   |
| ...AUCACGGCGUUCUCGGCGUCU...          | 946    |
| ...AUCACGGCGUUCUCGGCGUCUG...         | 21     |
| ...AUCACGGCGUUCUCGGCGUCUGU...        | 30     |
| ...UCACGGCGUUCUCGGC...               | 11     |
| ...UCACGGCGUUCUCGGCG...              | 137    |
| ...UCACGGCGUUCUCGGCGU...             | 469    |
| ...UCACGGCGUUCUCGGCGUC...            | 2787   |
| ...UCACGGCGUUCUCGGCGUCU...           | 405    |
| ...UCACGGCGUUCUCGGCGUCUG...          | 28     |
| ...UCACGGCGUUCUCGGCGUCUGU...         | 10     |
| ...UCACGGCGUUCUCGGCGUCUGUGAA...      | 2      |
| ...CACGGCGUUCUCGGCG...               | 144    |
| ...CACGGCGUUCUCGGCGU...              | 549    |
| ...CACGGCGUUCUCGGCGUC...             | 4883   |
| ...CACGGCGUUCUCGGCGUCU...            | 757    |
| ...CACGGCGUUCUCGGCGUCUG...           | 38     |
| ...CACGGCGUUCUCGGCGUCUGU...          | 5      |
| ...CACGGCGUUCUCGGCGUCUGUGAAGCC...    | 2      |
| ...ACGGCGUUCUCGGCGU...               | 123    |
| ...ACGGCGUUCUCGGCGUC...              | 882    |
| ...ACGGCGUUCUCGGCGUCU...             | 181    |
| ...ACGGCGUUCUCGGCGUCUG...            | 104    |

|                                       |     |
|---------------------------------------|-----|
| .....ACGGCGUUCUCGGCGUCUGU.....        | 5   |
| .....ACGGCGUUCUCGGCGUCUGUG.....       | 7   |
| .....ACGGCGUUCUCGGCGUCUGUGA.....      | 2   |
| .....ACGGCGUUCUCGGCGUCUGUGAAG.....    | 6   |
| .....ACGGCGUUCUCGGCGUCUGUGAAGCCA..... | 2   |
| .....CGGCGUUCUCGGCGU.....             | 2   |
| .....CGGCGUUCUCGGCGUC.....            | 480 |
| .....CGGCGUUCUCGGCGUCU.....           | 57  |
| .....CGGCGUUCUCGGCGUCUG.....          | 27  |
| .....CGGCGUUCUCGGCGUCUGUG.....        | 6   |
| .....CGGCGUUCUCGGCGUCUGUGA.....       | 2   |
| .....CGGCGUUCUCGGCGUCUGUGAA.....      | 6   |
| .....CGGCGUUCUCGGCGUCUGUGAAG.....     | 36  |
| .....CGGCGUUCUCGGCGUCUGUGAAGCC.....   | 3   |
| .....CGGCGUUCUCGGCGUCUGUGAAGCCA.....  | 4   |
| .....CGGCGUUCUCGGCGUCUGUGAAGCCAC..... | 3   |
| .....GGCGUUCUCGGCGUC.....             | 5   |
| .....GGCGUUCUCGGCGUCU.....            | 9   |
| .....GGCGUUCUCGGCGUCUG.....           | 2   |
| .....GGCGUUCUCGGCGUCUGUGAAGCCA.....   | 3   |
| .....GCGUUCUCGGCGUCUG.....            | 4   |
| .....GCGUUCUCGGCGUCUGU.....           | 2   |
| .....GCGUUCUCGGCGUCUGUG.....          | 6   |
| .....GCGUUCUCGGCGUCUGUGA.....         | 2   |
| .....GCGUUCUCGGCGUCUGUGAAG.....       | 2   |
| .....GCGUUCUCGGCGUCUGUGAAGC.....      | 3   |
| .....GCGUUCUCGGCGUCUGUGAAGCC.....     | 2   |
| .....GCGUUCUCGGCGUCUGUGAAGCCA.....    | 2   |
| .....GCGUUCUCGGCGUCUGUGAAGCCAC.....   | 3   |
| .....CGUUCUCGGCGUCUGU.....            | 3   |
| .....CGUUCUCGGCGUCUGUG.....           | 6   |
| .....CGUUCUCGGCGUCUGUGAA.....         | 3   |
| .....CGUUCUCGGCGUCUGUGAAGCC.....      | 3   |
| .....CGUUCUCGGCGUCUGUGAAGCCA.....     | 11  |
| .....GUUCUCGGCGUCUGUG.....            | 2   |
| .....GUUCUCGGCGUCUGUGA.....           | 2   |
| .....GUUCUCGGCGUCUGUGAAG.....         | 8   |
| .....GUUCUCGGCGUCUGUGAAGC.....        | 3   |
| .....GUUCUCGGCGUCUGUGAAGCCA.....      | 5   |
| .....GUUCUCGGCGUCUGUGAAGCCAC.....     | 9   |
| .....GUUCUCGGCGUCUGUGAAGCCACA.....    | 2   |
| .....GUUCUCGGCGUCUGUGAAGCCACAG.....   | 2   |
| .....UUCUCGGCGUCUGUGAAG.....          | 3   |
| .....UUCUCGGCGUCUGUGAAGC.....         | 2   |
| .....UUCUCGGCGUCUGUGAAGCCA.....       | 5   |
| .....UUCUCGGCGUCUGUGAAGCCACA.....     | 4   |
| .....UUCUCGGCGUCUGUGAAGCCACAG.....    | 2   |

|                                         |    |
|-----------------------------------------|----|
| .....UUCUCGGCGUCUGUGAAGCCACAGA.....     | 2  |
| .....UUCUCGGCGUCUGUGAAGCCACAGAU.....    | 2  |
| .....UCUCGGCGUCUGUGAAG.....             | 3  |
| .....UCUCGGCGUCUGUGAAGC.....            | 2  |
| .....UCUCGGCGUCUGUGAAGCCA.....          | 6  |
| .....UCUCGGCGUCUGUGAAGCCAC.....         | 4  |
| .....UCUCGGCGUCUGUGAAGCCACA.....        | 2  |
| .....CUCGGCGUCUGUGAAG.....              | 2  |
| .....CUCGGCGUCUGUGAAGC.....             | 3  |
| .....CUCGGCGUCUGUGAAGCC.....            | 2  |
| .....CUCGGCGUCUGUGAAGCCA.....           | 7  |
| .....CUCGGCGUCUGUGAAGCCAC.....          | 8  |
| .....CUCGGCGUCUGUGAAGCCACAGA.....       | 2  |
| .....UCGGCGUCUGUGAAGCC.....             | 2  |
| .....UCGGCGUCUGUGAAGCCA.....            | 6  |
| .....UCGGCGUCUGUGAAGCCAC.....           | 2  |
| .....CGGCGUCUGUGAAGCC.....              | 3  |
| .....CGGCGUCUGUGAAGCCA.....             | 3  |
| .....CGGCGUCUGUGAAGCCAC.....            | 2  |
| .....CGGCGUCUGUGAAGCCACA.....           | 3  |
| .....CGGCGUCUGUGAAGCCACAGAUGGGAC.....   | 4  |
| .....GGCGUCUGUGAAGCCAC.....             | 5  |
| .....GGCGUCUGUGAAGCCACAGAUGGGA.....     | 4  |
| .....GCGUCUGUGAAGCCAC.....              | 8  |
| .....GCGUCUGUGAAGCCACAGAUG.....         | 4  |
| .....GCGUCUGUGAAGCCACAGAUGGG.....       | 2  |
| .....GCGUCUGUGAAGCCACAGAUGGGA.....      | 10 |
| .....GCGUCUGUGAAGCCACAGAUGGGACG.....    | 6  |
| .....CGUCUGUGAAGCCACAG.....             | 6  |
| .....CGUCUGUGAAGCCACAGA.....            | 2  |
| .....CGUCUGUGAAGCCACAGAUGGG.....        | 6  |
| .....CGUCUGUGAAGCCACAGAUGGGA.....       | 3  |
| .....CGUCUGUGAAGCCACAGAUGGGAC.....      | 2  |
| .....CGUCUGUGAAGCCACAGAUGGGACGC.....    | 3  |
| .....CGUCUGUGAAGCCACAGAUGGGACGCC.....   | 3  |
| .....CGUCUGUGAAGCCACAGAUGGGACGCCGA..... | 2  |
| .....GUCUGUGAAGCCACAGA.....             | 3  |
| .....GUCUGUGAAGCCACAGAUG.....           | 3  |
| .....GUCUGUGAAGCCACAGAUGG.....          | 3  |
| .....GUCUGUGAAGCCACAGAUGGGA.....        | 2  |
| .....GUCUGUGAAGCCACAGAUGGGACG.....      | 10 |
| .....GUCUGUGAAGCCACAGAUGGGACGC.....     | 5  |
| .....GUCUGUGAAGCCACAGAUGGGACGCC.....    | 4  |
| .....GUCUGUGAAGCCACAGAUGGGACGCCG.....   | 3  |
| .....GUCUGUGAAGCCACAGAUGGGACGCCGA.....  | 3  |
| .....GUCUGUGAAGCCACAGAUGGGACGCCGAG..... | 2  |
| .....UCUGUGAAGCCACAGAU.....             | 3  |

|                                          |      |
|------------------------------------------|------|
| .....UCUGUGAAGCCACAGAUGG.....            | 2    |
| .....UCUGUGAAGCCACAGAUGGGA.....          | 5    |
| .....UCUGUGAAGCCACAGAUGGGAC.....         | 2    |
| .....UCUGUGAAGCCACAGAUGGGACG.....        | 503  |
| .....UCUGUGAAGCCACAGAUGGGACGCC.....      | 2    |
| .....UCUGUGAAGCCACAGAUGGGACGCCGAG.....   | 2    |
| .....CUGUGAAGCCACAGAU.....               | 2    |
| .....CUGUGAAGCCACAGAUGG.....             | 12   |
| .....CUGUGAAGCCACAGAUGGG.....            | 3    |
| .....CUGUGAAGCCACAGAUGGGA.....           | 18   |
| .....CUGUGAAGCCACAGAUGGGAC.....          | 898  |
| .....CUGUGAAGCCACAGAUGGGACG.....         | 21   |
| .....CUGUGAAGCCACAGAUGGGACGC.....        | 9    |
| .....CUGUGAAGCCACAGAUGGGACGCC.....       | 3    |
| .....CUGUGAAGCCACAGAUGGGACGCCG.....      | 3    |
| .....CUGUGAAGCCACAGAUGGGACGCCGAG.....    | 2    |
| .....CUGUGAAGCCACAGAUGGGACGCCGAGAA.....  | 4    |
| .....UGUGAAGCCACAGAUG.....               | 2    |
| .....UGUGAAGCCACAGAUGG.....              | 22   |
| .....UGUGAAGCCACAGAUGGG.....             | 7    |
| .....UGUGAAGCCACAGAUGGGA.....            | 2732 |
| .....UGUGAAGCCACAGAUGGGAC.....           | 21   |
| .....UGUGAAGCCACAGAUGGGACG.....          | 33   |
| .....UGUGAAGCCACAGAUGGGACGC.....         | 10   |
| .....UGUGAAGCCACAGAUGGGACGCC.....        | 4    |
| .....UGUGAAGCCACAGAUGGGACGCCG.....       | 6    |
| .....UGUGAAGCCACAGAUGGGACGCCGA.....      | 9    |
| .....UGUGAAGCCACAGAUGGGACGCCGAG.....     | 4    |
| .....UGUGAAGCCACAGAUGGGACGCCGAGA.....    | 3    |
| .....UGUGAAGCCACAGAUGGGACGCCGAGAAC.....  | 3    |
| .....UGUGAAGCCACAGAUGGGACGCCGAGAACG..... | 2    |
| .....GUGAAGCCACAGAUGG.....               | 4    |
| .....GUGAAGCCACAGAUGGG.....              | 9    |
| .....GUGAAGCCACAGAUGGGA.....             | 27   |
| .....GUGAAGCCACAGAUGGGAC.....            | 10   |
| .....GUGAAGCCACAGAUGGGACG.....           | 49   |
| .....GUGAAGCCACAGAUGGGACGC.....          | 8    |
| .....GUGAAGCCACAGAUGGGACGCC.....         | 4    |
| .....GUGAAGCCACAGAUGGGACGCCG.....        | 5    |
| .....GUGAAGCCACAGAUGGGACGCCGA.....       | 6    |
| .....GUGAAGCCACAGAUGGGACGCCGAG.....      | 4    |
| .....GUGAAGCCACAGAUGGGACGCCGAGA.....     | 2    |
| .....GUGAAGCCACAGAUGGGACGCCGAGAAC.....   | 2    |
| .....GUGAAGCCACAGAUGGGACGCCGAGAACG.....  | 2    |
| .....UGAAGCCACAGAUGGG.....               | 15   |
| .....UGAAGCCACAGAUGGGA.....              | 26   |
| .....UGAAGCCACAGAUGGGAC.....             | 37   |

|                                          |     |
|------------------------------------------|-----|
| .....UGAAGCCACAGAUGGGACG.....            | 88  |
| .....UGAAGCCACAGAUGGGACGC.....           | 30  |
| .....UGAAGCCACAGAUGGGACGCC.....          | 12  |
| .....UGAAGCCACAGAUGGGACGCCG.....         | 13  |
| .....UGAAGCCACAGAUGGGACGCCGA.....        | 12  |
| .....UGAAGCCACAGAUGGGACGCCGAG.....       | 14  |
| .....UGAAGCCACAGAUGGGACGCCGAGA.....      | 2   |
| .....UGAAGCCACAGAUGGGACGCCGAGAA.....     | 6   |
| .....UGAAGCCACAGAUGGGACGCCGAGAAC.....    | 7   |
| .....UGAAGCCACAGAUGGGACGCCGAGAACG.....   | 7   |
| .....UGAAGCCACAGAUGGGACGCCGAGAACGC.....  | 5   |
| .....UGAAGCCACAGAUGGGACGCCGAGAACGCC..... | 5   |
| .....GAAGCCACAGAUGGGA.....               | 5   |
| .....GAAGCCACAGAUGGGAC.....              | 11  |
| .....GAAGCCACAGAUGGGACG.....             | 30  |
| .....GAAGCCACAGAUGGGACGC.....            | 7   |
| .....GAAGCCACAGAUGGGACGCC.....           | 2   |
| .....GAAGCCACAGAUGGGACGCCG.....          | 10  |
| .....GAAGCCACAGAUGGGACGCCGA.....         | 4   |
| .....GAAGCCACAGAUGGGACGCCGAG.....        | 4   |
| .....GAAGCCACAGAUGGGACGCCGAGAAC.....     | 2   |
| .....GAAGCCACAGAUGGGACGCCGAGAACGC.....   | 5   |
| .....GAAGCCACAGAUGGGACGCCGAGAACGCC.....  | 2   |
| .....AAGCCACAGAUGGGAC.....               | 6   |
| .....AAGCCACAGAUGGGACG.....              | 7   |
| .....AAGCCACAGAUGGGACGC.....             | 5   |
| .....AAGCCACAGAUGGGACGCCG.....           | 3   |
| .....AAGCCACAGAUGGGACGCCGA.....          | 5   |
| .....AAGCCACAGAUGGGACGCCGAGA.....        | 3   |
| .....AAGCCACAGAUGGGACGCCGAGAACGCCG.....  | 2   |
| .....AGCCACAGAUGGGACG.....               | 6   |
| .....AGCCACAGAUGGGACGC.....              | 3   |
| .....AGCCACAGAUGGGACGCCGAGAACGCCGU.....  | 2   |
| .....GCCACAGAUGGGACGC.....               | 6   |
| .....GCCACAGAUGGGACGCCGA.....            | 2   |
| .....GCCACAGAUGGGACGCCGAG.....           | 3   |
| .....GCCACAGAUGGGACGCCGAGAACGC.....      | 2   |
| .....CCACAGAUGGGACGCCGA.....             | 2   |
| .....CCACAGAUGGGACGCCGAG.....            | 2   |
| .....CCACAGAUGGGACGCCGAGA.....           | 2   |
| .....CCACAGAUGGGACGCCGAGAA.....          | 6   |
| .....CCACAGAUGGGACGCCGAGAAC.....         | 126 |
| .....CCACAGAUGGGACGCCGAGAACG.....        | 37  |
| .....CCACAGAUGGGACGCCGAGAACGC.....       | 6   |
| .....CCACAGAUGGGACGCCGAGAACGCC.....      | 3   |
| .....CCACAGAUGGGACGCCGAGAACGCCGUG.....   | 3   |
| .....CCACAGAUGGGACGCCGAGAACGCCGUGA.....  | 10  |



|                                          |    |
|------------------------------------------|----|
| .....CACAGAUGGGACGCCG.....               | 3  |
| .....CACAGAUGGGACGCCGA.....              | 3  |
| .....CACAGAUGGGACGCCGAG.....             | 4  |
| .....CACAGAUGGGACGCCGAGAA.....           | 4  |
| .....CACAGAUGGGACGCCGAGAAC.....          | 23 |
| .....CACAGAUGGGACGCCGAGAACG.....         | 12 |
| .....CACAGAUGGGACGCCGAGAACGC.....        | 4  |
| .....CACAGAUGGGACGCCGAGAACGCC.....       | 3  |
| .....CACAGAUGGGACGCCGAGAACGCCG.....      | 4  |
| .....CACAGAUGGGACGCCGAGAACGCCGUG.....    | 6  |
| .....CACAGAUGGGACGCCGAGAACGCCGUGA.....   | 5  |
| .....ACAGAUGGGACGCCGAG.....              | 2  |
| .....ACAGAUGGGACGCCGAGAAC.....           | 8  |
| .....ACAGAUGGGACGCCGAGAACG.....          | 7  |
| .....ACAGAUGGGACGCCGAGAACGCC.....        | 2  |
| .....ACAGAUGGGACGCCGAGAACGCCGUGA.....    | 2  |
| .....ACAGAUGGGACGCCGAGAACGCCGUGAU.....   | 3  |
| .....ACAGAUGGGACGCCGAGAACGCCGUGAUU.....  | 5  |
| .....CAGAUGGGACGCCGAG.....               | 22 |
| .....CAGAUGGGACGCCGAGA.....              | 8  |
| .....CAGAUGGGACGCCGAGAA.....             | 8  |
| .....CAGAUGGGACGCCGAGAAC.....            | 9  |
| .....CAGAUGGGACGCCGAGAACG.....           | 3  |
| .....CAGAUGGGACGCCGAGAACGC.....          | 5  |
| .....CAGAUGGGACGCCGAGAACGCC.....         | 4  |
| .....CAGAUGGGACGCCGAGAACGCCG.....        | 2  |
| .....CAGAUGGGACGCCGAGAACGCCGU.....       | 5  |
| .....CAGAUGGGACGCCGAGAACGCCGUG.....      | 9  |
| .....CAGAUGGGACGCCGAGAACGCCGUGA.....     | 7  |
| .....CAGAUGGGACGCCGAGAACGCCGUGAU.....    | 5  |
| .....CAGAUGGGACGCCGAGAACGCCGUGAUU.....   | 5  |
| .....AGAUGGGACGCCGAGA.....               | 5  |
| .....AGAUGGGACGCCGAGAA.....              | 21 |
| .....AGAUGGGACGCCGAGAAC.....             | 4  |
| .....AGAUGGGACGCCGAGAACG.....            | 6  |
| .....AGAUGGGACGCCGAGAACGC.....           | 4  |
| .....AGAUGGGACGCCGAGAACGCC.....          | 2  |
| .....AGAUGGGACGCCGAGAACGCCG.....         | 2  |
| .....AGAUGGGACGCCGAGAACGCCGU.....        | 2  |
| .....AGAUGGGACGCCGAGAACGCCGUG.....       | 2  |
| .....AGAUGGGACGCCGAGAACGCCGUGA.....      | 5  |
| .....AGAUGGGACGCCGAGAACGCCGUGAU.....     | 4  |
| .....AGAUGGGACGCCGAGAACGCCGUGAUU.....    | 6  |
| .....AGAUGGGACGCCGAGAACGCCGUGAUUU.....   | 2  |
| .....AGAUGGGACGCCGAGAACGCCGUGAUUUU.....  | 3  |
| .....AGAUGGGACGCCGAGAACGCCGUGAUUUUU..... | 9  |
| .....GAUGGGACGCCGAGAA.....               | 2  |

|                                         |    |
|-----------------------------------------|----|
| .....GAUGGGACGCCGAGAAC.....             | 3  |
| .....GAUGGGACGCCGAGAACGCCGUG.....       | 2  |
| .....GAUGGGACGCCGAGAACGCCGUGA.....      | 2  |
| .....GAUGGGACGCCGAGAACGCCGUGAUUUU.....  | 2  |
| .....GAUGGGACGCCGAGAACGCCGUGAUUUUU..... | 6  |
| .....AUGGGACGCCGAGAAC.....              | 26 |
| .....AUGGGACGCCGAGAACG.....             | 22 |
| .....AUGGGACGCCGAGAACGC.....            | 5  |
| .....AUGGGACGCCGAGAACGCCGUG.....        | 2  |
| .....AUGGGACGCCGAGAACGCCGUGA.....       | 5  |
| .....AUGGGACGCCGAGAACGCCGUGAU.....      | 2  |
| .....AUGGGACGCCGAGAACGCCGUGAUU.....     | 3  |
| .....AUGGGACGCCGAGAACGCCGUGAUUU.....    | 4  |
| .....AUGGGACGCCGAGAACGCCGUGAUUUU.....   | 5  |
| .....AUGGGACGCCGAGAACGCCGUGAUUUUU.....  | 16 |
| .....UGGGACGCCGAGAACG.....              | 24 |
| .....UGGGACGCCGAGAACGC.....             | 7  |
| .....UGGGACGCCGAGAACGCC.....            | 9  |
| .....UGGGACGCCGAGAACGCCG.....           | 9  |
| .....UGGGACGCCGAGAACGCCGU.....          | 6  |
| .....UGGGACGCCGAGAACGCCGUG.....         | 4  |
| .....UGGGACGCCGAGAACGCCGUGA.....        | 19 |
| .....UGGGACGCCGAGAACGCCGUGAU.....       | 6  |
| .....UGGGACGCCGAGAACGCCGUGAUU.....      | 14 |
| .....UGGGACGCCGAGAACGCCGUGAUUU.....     | 9  |
| .....UGGGACGCCGAGAACGCCGUGAUUUU.....    | 35 |
| .....UGGGACGCCGAGAACGCCGUGAUUUUU.....   | 81 |
| .....GGGACGCCGAGAACGC.....              | 2  |
| .....GGGACGCCGAGAACGCC.....             | 7  |
| .....GGGACGCCGAGAACGCCG.....            | 5  |
| .....GGGACGCCGAGAACGCCGU.....           | 2  |
| .....GGGACGCCGAGAACGCCGUG.....          | 5  |
| .....GGGACGCCGAGAACGCCGUGA.....         | 17 |
| .....GGGACGCCGAGAACGCCGUGAU.....        | 5  |
| .....GGGACGCCGAGAACGCCGUGAUU.....       | 2  |
| .....GGGACGCCGAGAACGCCGUGAUUU.....      | 3  |
| .....GGGACGCCGAGAACGCCGUGAUUUU.....     | 13 |
| .....GGGACGCCGAGAACGCCGUGAUUUUU.....    | 35 |
| .....GGACGCCGAGAACGCC.....              | 7  |
| .....GGACGCCGAGAACGCCG.....             | 6  |
| .....GGACGCCGAGAACGCCGUGA.....          | 17 |
| .....GGACGCCGAGAACGCCGUGAU.....         | 2  |
| .....GGACGCCGAGAACGCCGUGAUUU.....       | 2  |
| .....GGACGCCGAGAACGCCGUGAUUUU.....      | 7  |
| .....GGACGCCGAGAACGCCGUGAUUUUU.....     | 5  |
| .....GACGCCGAGAACGCCG.....              | 8  |
| .....GACGCCGAGAACGCCGU.....             | 2  |

|                               |       |
|-------------------------------|-------|
| .....GACGCCGAGAACGCCGUG.....  | 5     |
| .....GACGCCGAGAACGCCGUGA..... | 42    |
| .....GACGCCGAGAACGCCGUGAU.... | 15    |
| .....GACGCCGAGAACGCCGUGAUU... | 46    |
| .....GACGCCGAGAACGCCGUGAUUU.. | 50    |
| .....GACGCCGAGAACGCCGUGAUUUU. | 346   |
| .....GACGCCGAGAACGCCGUGAUUUUU | 943   |
| .....ACGCCGAGAACGCCGU.....    | 11    |
| .....ACGCCGAGAACGCCGUG.....   | 8     |
| .....ACGCCGAGAACGCCGUGA.....  | 71    |
| .....ACGCCGAGAACGCCGUGAU....  | 68    |
| .....ACGCCGAGAACGCCGUGAUU...  | 277   |
| .....ACGCCGAGAACGCCGUGAUUU..  | 783   |
| .....ACGCCGAGAACGCCGUGAUUUU.  | 3085  |
| .....ACGCCGAGAACGCCGUGAUUUUU  | 2840  |
| .....CGCCGAGAACGCCGUG.....    | 86    |
| .....CGCCGAGAACGCCGUGA.....   | 661   |
| .....CGCCGAGAACGCCGUGAU....   | 1103  |
| .....CGCCGAGAACGCCGUGAUU...   | 2656  |
| .....CGCCGAGAACGCCGUGAUUU..   | 2380  |
| .....CGCCGAGAACGCCGUGAUUUU.   | 23249 |
| .....CGCCGAGAACGCCGUGAUUUUU   | 68449 |
| .....GCCGAGAACGCCGUGA.....    | 100   |
| .....GCCGAGAACGCCGUGAU....    | 90    |
| .....GCCGAGAACGCCGUGAUU...    | 205   |
| .....GCCGAGAACGCCGUGAUUU..    | 290   |
| .....GCCGAGAACGCCGUGAUUUU.    | 741   |
| .....GCCGAGAACGCCGUGAUUUUU    | 5902  |
| .....CCGAGAACGCCGUGAU....     | 17    |
| .....CCGAGAACGCCGUGAUU...     | 41    |
| .....CCGAGAACGCCGUGAUUU..     | 68    |
| .....CCGAGAACGCCGUGAUUUU.     | 192   |
| .....CCGAGAACGCCGUGAUUUUU     | 529   |
| .....CGAGAACGCCGUGAUU...      | 15    |
| .....CGAGAACGCCGUGAUUU..      | 23    |
| .....CGAGAACGCCGUGAUUUU.      | 134   |
| .....CGAGAACGCCGUGAUUUUU      | 361   |
| .....GAGAACGCCGUGAUUU..       | 15    |
| .....GAGAACGCCGUGAUUUU.       | 112   |
| .....GAGAACGCCGUGAUUUUU       | 321   |
| .....AGAACGCCGUGAUUUU.        | 64    |
| .....AGAACGCCGUGAUUUUU        | 208   |
| .....GAACGCCGUGAUUUUU         | 44    |

**#cshR-rluc-201**

|                                                                     |       |
|---------------------------------------------------------------------|-------|
| GUUAGAUGCAUCUAGCCACGGGUCUGUGAAGCCACAGAUGGGAGCCCUGGCCUAGAUGCAUCUUUUU | Reads |
| .UUAGAUGCAUCUAGCCACGG.....                                          | 2     |

|                                       |        |
|---------------------------------------|--------|
| .UUAGAUGCAUCUAGCCACGGGUCU.....        | 4      |
| .UUAGAUGCAUCUAGCCACGGGUCUC.....       | 4      |
| ..UAGAUGCAUCUAGCCACGG.....            | 6      |
| ..UAGAUGCAUCUAGCCACGGG.....           | 2      |
| ..UAGAUGCAUCUAGCCACGGGC.....          | 2      |
| ..UAGAUGCAUCUAGCCACGGGCU.....         | 7      |
| ..UAGAUGCAUCUAGCCACGGGUC.....         | 27     |
| ..UAGAUGCAUCUAGCCACGGGUCUC.....       | 73     |
| ...AGAUGCAUCUAGCCA.....               | 6      |
| ...AGAUGCAUCUAGCCAC.....              | 139    |
| ...AGAUGCAUCUAGCCACG.....             | 826    |
| ...AGAUGCAUCUAGCCACGG.....            | 15087  |
| ...AGAUGCAUCUAGCCACGGG.....           | 5705   |
| ...AGAUGCAUCUAGCCACGGGC.....          | 1620   |
| ...AGAUGCAUCUAGCCACGGGCU.....         | 6337   |
| ...AGAUGCAUCUAGCCACGGGUC.....         | 69744  |
| ...AGAUGCAUCUAGCCACGGGUCUC.....       | 399031 |
| ...AGAUGCAUCUAGCCACGGGUCUCUG.....     | 260    |
| ...AGAUGCAUCUAGCCACGGGUCUCUGU.....    | 142    |
| ...AGAUGCAUCUAGCCACGGGUCUCUGUG.....   | 14     |
| ...AGAUGCAUCUAGCCACGGGUCUCUGUGA.....  | 6      |
| ...AGAUGCAUCUAGCCACGGGUCUCUGUGAA..... | 3      |
| ....GAUGCAUCUAGCCACG.....             | 17     |
| ....GAUGCAUCUAGCCACGG.....            | 330    |
| ....GAUGCAUCUAGCCACGGG.....           | 120    |
| ....GAUGCAUCUAGCCACGGGC.....          | 39     |
| ....GAUGCAUCUAGCCACGGGCU.....         | 150    |
| ....GAUGCAUCUAGCCACGGGUC.....         | 1864   |
| ....GAUGCAUCUAGCCACGGGUCUC.....       | 5684   |
| ....GAUGCAUCUAGCCACGGGUCUCUG.....     | 19     |
| ....GAUGCAUCUAGCCACGGGUCUCUGU.....    | 13     |
| ....GAUGCAUCUAGCCACGGGUCUCUGUGA.....  | 3      |
| .....AUGCAUCUAGCCACGG.....            | 99     |
| .....AUGCAUCUAGCCACGGG.....           | 63     |
| .....AUGCAUCUAGCCACGGGC.....          | 44     |
| .....AUGCAUCUAGCCACGGGCU.....         | 99     |
| .....AUGCAUCUAGCCACGGGUC.....         | 811    |
| .....AUGCAUCUAGCCACGGGUCUC.....       | 3569   |
| .....AUGCAUCUAGCCACGGGUCUCUG.....     | 7      |
| .....AUGCAUCUAGCCACGGGUCUCUGU.....    | 13     |
| .....AUGCAUCUAGCCACGGGUCUCUGUG.....   | 2      |
| .....AUGCAUCUAGCCACGGGUCUCUGUGAA..... | 3      |
| .....UGCAUCUAGCCACGGG.....            | 8      |
| .....UGCAUCUAGCCACGGGC.....           | 16     |
| .....UGCAUCUAGCCACGGGCU.....          | 29     |
| .....UGCAUCUAGCCACGGGUC.....          | 266    |
| .....UGCAUCUAGCCACGGGUCUC.....        | 840    |

|                                     |     |
|-------------------------------------|-----|
| .....UGCAUCUAGCCACGGGCUCUG.....     | 8   |
| .....UGCAUCUAGCCACGGGCUCUGU.....    | 6   |
| .....UGCAUCUAGCCACGGGCUCUGUG.....   | 6   |
| .....UGCAUCUAGCCACGGGCUCUGUGAA..... | 2   |
| .....GCAUCUAGCCACGGGC.....          | 19  |
| .....GCAUCUAGCCACGGGCU.....         | 49  |
| .....GCAUCUAGCCACGGGCUC.....        | 279 |
| .....GCAUCUAGCCACGGGCUCU.....       | 746 |
| .....GCAUCUAGCCACGGGCUCUG.....      | 10  |
| .....GCAUCUAGCCACGGGCUCUGU.....     | 6   |
| .....GCAUCUAGCCACGGGCUCUGUGAAG..... | 4   |
| .....CAUCUAGCCACGGGCU.....          | 22  |
| .....CAUCUAGCCACGGGCUC.....         | 144 |
| .....CAUCUAGCCACGGGCUCU.....        | 373 |
| .....CAUCUAGCCACGGGCUCUG.....       | 3   |
| .....CAUCUAGCCACGGGCUCUGU.....      | 3   |
| .....CAUCUAGCCACGGGCUCUGUGAAG.....  | 4   |
| .....AUCUAGCCACGGGCUC.....          | 167 |
| .....AUCUAGCCACGGGCUCU.....         | 452 |
| .....AUCUAGCCACGGGCUCUG.....        | 6   |
| .....AUCUAGCCACGGGCUCUGU.....       | 2   |
| .....AUCUAGCCACGGGCUCUGUG.....      | 2   |
| .....AUCUAGCCACGGGCUCUGUGAA.....    | 8   |
| .....AUCUAGCCACGGGCUCUGUGAAG.....   | 15  |
| .....AUCUAGCCACGGGCUCUGUGAAGC.....  | 2   |
| .....UCUAGCCACGGGCUCU.....          | 196 |
| .....UCUAGCCACGGGCUCUG.....         | 3   |
| .....UCUAGCCACGGGCUCUGUGA.....      | 5   |
| .....UCUAGCCACGGGCUCUGUGAA.....     | 3   |
| .....UCUAGCCACGGGCUCUGUGAAG.....    | 10  |
| .....CUAGCCACGGGCUCU.....           | 3   |
| .....CUAGCCACGGGCUCUG.....          | 8   |
| .....CUAGCCACGGGCUCUGU.....         | 3   |
| .....CUAGCCACGGGCUCUGUGAAG.....     | 2   |
| .....UAGCCACGGGCUCUGU.....          | 2   |
| .....UAGCCACGGGCUCUGUG.....         | 5   |
| .....UAGCCACGGGCUCUGUGA.....        | 2   |
| .....UAGCCACGGGCUCUGUGAA.....       | 2   |
| .....UAGCCACGGGCUCUGUGAAG.....      | 7   |
| .....AGCCACGGGCUCUGUG.....          | 2   |
| .....GCCACGGGCUCUGUGA.....          | 3   |
| .....CGGGCUCUGUGAAGCCAC.....        | 2   |
| .....GCUCUGUGAAGCCACAGAU.....       | 3   |
| .....CUCUGUGAAGCCACAGA.....         | 2   |
| .....CUCUGUGAAGCCACAGAUGG.....      | 3   |
| .....CUCUGUGAAGCCACAGAUGGGAG.....   | 3   |
| .....UCUGUGAAGCCACAGAUG.....        | 2   |

|                                       |     |
|---------------------------------------|-----|
| .....CUGUGAAGCCACAGAUGGGAG.....       | 57  |
| .....UGUGAAGCCACAGAUG.....            | 2   |
| .....UGUGAAGCCACAGAUGG.....           | 5   |
| .....UGUGAAGCCACAGAUGGG.....          | 9   |
| .....UGUGAAGCCACAGAUGGGA.....         | 930 |
| .....UGUGAAGCCACAGAUGGGAG.....        | 3   |
| .....UGUGAAGCCACAGAUGGGAGCCCGUG.....  | 2   |
| .....UGUGAAGCCACAGAUGGGAGCCCGUGG..... | 4   |
| .....GUGAAGCCACAGAUGG.....            | 3   |
| .....GUGAAGCCACAGAUGGG.....           | 287 |
| .....GUGAAGCCACAGAUGGGA.....          | 35  |
| .....GUGAAGCCACAGAUGGGAG.....         | 3   |
| .....GUGAAGCCACAGAUGGGAGC.....        | 2   |
| .....UGAAGCCACAGAUGGG.....            | 7   |
| .....UGAAGCCACAGAUGGGA.....           | 3   |
| .....UGAAGCCACAGAUGGGAG.....          | 6   |
| .....UGAAGCCACAGAUGGGAGCC.....        | 3   |
| .....UGAAGCCACAGAUGGGAGCCC.....       | 7   |
| .....UGAAGCCACAGAUGGGAGCCCGU.....     | 2   |
| .....UGAAGCCACAGAUGGGAGCCCGUG.....    | 6   |
| .....UGAAGCCACAGAUGGGAGCCCGUGG.....   | 2   |
| .....GAAGCCACAGAUGGGA.....            | 3   |
| .....GAAGCCACAGAUGGGAGCCC.....        | 2   |
| .....ACAGAUGGGAGCCCGUGGC.....         | 2   |
| .....CAGAUGGGAGCCCGUGG.....           | 4   |
| .....AGAUGGGAGCCCGUGG.....            | 2   |

**#shR-miR-150 WU3**

|                                                               | Reads |
|---------------------------------------------------------------|-------|
| UUUGGUACAAGGGUUGGGAGAUGCUGUGCCUCAGACCUCUCCCAACCCUUGUACCAUUUUU |       |
| UUUGGUACAAGGGUUGGGAGAUG.....                                  | 2     |
| UUUGGUACAAGGGUUGGGAGAUGC.....                                 | 2     |
| .UUGGUACAAGGGUUGGGA.....                                      | 2     |
| .UUGGUACAAGGGUUGGGAGA.....                                    | 2     |
| .UUGGUACAAGGGUUGGGAGAU.....                                   | 12    |
| .UUGGUACAAGGGUUGGGAGAUG.....                                  | 20    |
| .UUGGUACAAGGGUUGGGAGAUGC.....                                 | 2     |
| ..UGGUACAAGGGUUGGG.....                                       | 2     |
| ..UGGUACAAGGGUUGGGA.....                                      | 7     |
| ..UGGUACAAGGGUUGGGAGA.....                                    | 13    |
| ..UGGUACAAGGGUUGGGAGAU.....                                   | 19    |
| ..UGGUACAAGGGUUGGGAGAUG.....                                  | 38    |
| ..UGGUACAAGGGUUGGGAGAUGC.....                                 | 55    |
| ..UGGUACAAGGGUUGGGAGAUGC.....                                 | 3     |
| ..UGGUACAAGGGUUGGGAGAUGCUG.....                               | 2     |
| ...GGUACAAGGGUUGGGA.....                                      | 1020  |
| ...GGUACAAGGGUUGGGAG.....                                     | 333   |
| ...GGUACAAGGGUUGGGAGA.....                                    | 2526  |

|                                               |      |
|-----------------------------------------------|------|
| ... GGUACAAGGGUUGGGAGAU . . . . .             | 669  |
| ... GGUACAAGGGUUGGGAGAU G . . . . .           | 1334 |
| ... GGUACAAGGGUUGGGAGAU GC . . . . .          | 748  |
| ... GGUACAAGGGUUGGGAGAU GCU . . . . .         | 139  |
| ... GGUACAAGGGUUGGGAGAU G CUG . . . . .       | 103  |
| ... GGUACAAGGGUUGGGAGAU G CUGU . . . . .      | 68   |
| ... GGUACAAGGGUUGGGAGAU G CUGUG . . . . .     | 46   |
| ... GGUACAAGGGUUGGGAGAU G CUGUG C . . . . .   | 141  |
| ... GGUACAAGGGUUGGGAGAU G CUGUG CC . . . . .  | 49   |
| ... GUACAAGGGUUGGGAG . . . . .                | 31   |
| ... GUACAAGGGUUGGGAG A . . . . .              | 198  |
| ... GUACAAGGGUUGGGAG AU . . . . .             | 30   |
| ... GUACAAGGGUUGGGAG AU G . . . . .           | 56   |
| ... GUACAAGGGUUGGGAG AU GC . . . . .          | 47   |
| ... GUACAAGGGUUGGGAG AU GCU . . . . .         | 25   |
| ... GUACAAGGGUUGGGAG AU G CUG . . . . .       | 15   |
| ... GUACAAGGGUUGGGAG AU G CUGU . . . . .      | 14   |
| ... GUACAAGGGUUGGGAG AU G CUGUG . . . . .     | 10   |
| ... GUACAAGGGUUGGGAG AU G CUGUG C . . . . .   | 45   |
| ... GUACAAGGGUUGGGAG AU G CUGUG CC . . . . .  | 15   |
| ... GUACAAGGGUUGGGAG AU G CUGUG CCU . . . . . | 8    |
| ... UACAAGGGUUGGGAG A . . . . .               | 23   |
| ... UACAAGGGUUGGGAG AU . . . . .              | 3    |
| ... UACAAGGGUUGGGAG AU G . . . . .            | 9    |
| ... UACAAGGGUUGGGAG AU GC . . . . .           | 9    |
| ... UACAAGGGUUGGGAG AU GCU . . . . .          | 6    |
| ... UACAAGGGUUGGGAG AU G CUG . . . . .        | 6    |
| ... UACAAGGGUUGGGAG AU G CUGU . . . . .       | 3    |
| ... UACAAGGGUUGGGAG AU G CUGUG CCU . . . . .  | 5    |
| ... UACAAGGGUUGGGAG AU G CUGUG CCUC . . . . . | 6    |
| ... ACAAGGGUUGGGAG AU . . . . .               | 15   |
| ... ACAAGGGUUGGGAG AU G . . . . .             | 18   |
| ... ACAAGGGUUGGGAG AU GC . . . . .            | 24   |
| ... ACAAGGGUUGGGAG AU GCU . . . . .           | 10   |
| ... ACAAGGGUUGGGAG AU G CUG . . . . .         | 2    |
| ... ACAAGGGUUGGGAG AU G CUGU . . . . .        | 4    |
| ... ACAAGGGUUGGGAG AU G CUGUG C . . . . .     | 2    |
| ... ACAAGGGUUGGGAG AU G CUGUG CC . . . . .    | 2    |
| ... ACAAGGGUUGGGAG AU G CUGUG CCUCA . . . . . | 3    |
| ... CAAGGGUUGGGAG AU G . . . . .              | 9    |
| ... CAAGGGUUGGGAG AU GC . . . . .             | 10   |
| ... CAAGGGUUGGGAG AU GCU . . . . .            | 3    |
| ... CAAGGGUUGGGAG AU G CUG . . . . .          | 2    |
| ... CAAGGGUUGGGAG AU G CUGUG CCU . . . . .    | 2    |
| ... CAAGGGUUGGGAG AU G CUGUG CCUC . . . . .   | 5    |
| ... AAGGGUUGGGAG AU GC . . . . .              | 7    |
| ... AAGGGUUGGGAG AU GCU . . . . .             | 6    |

|                                       |    |
|---------------------------------------|----|
| .....AAGGGUUGGGAGAUGCUG.....          | 3  |
| .....AAGGGUUGGGAGAUGCUGUGC.....       | 2  |
| .....AAGGGUUGGGAGAUGCUGUGCC.....      | 3  |
| .....AAGGGUUGGGAGAUGCUGUGCCU.....     | 2  |
| .....AAGGGUUGGGAGAUGCUGUGCCUC.....    | 7  |
| .....AAGGGUUGGGAGAUGCUGUGCCUCA.....   | 2  |
| .....AGGGUUGGGAGAUGCUG.....           | 5  |
| .....AGGGUUGGGAGAUGCUGUGCCUCAGAC..... | 2  |
| .....GGGUUGGGAGAUGCUGUGC.....         | 2  |
| .....GGGUUGGGAGAUGCUGUGCCUC.....      | 3  |
| .....GGGUUGGGAGAUGCUGUGCCUCAGA.....   | 2  |
| .....GGGUUGGGAGAUGCUGUGCCUCAGAC.....  | 2  |
| .....GGUUGGGAGAUGCUGUG.....           | 2  |
| .....GGUUGGGAGAUGCUGUGC.....          | 2  |
| .....GGUUGGGAGAUGCUGUGCCUC.....       | 3  |
| .....GGUUGGGAGAUGCUGUGCCUCA.....      | 3  |
| .....GGUUGGGAGAUGCUGUGCCUCAGACCU..... | 4  |
| .....GUUGGGAGAUGCUGUGCC.....          | 3  |
| .....GUUGGGAGAUGCUGUGCCU.....         | 4  |
| .....GUUGGGAGAUGCUGUGCCUC.....        | 5  |
| .....GUUGGGAGAUGCUGUGCCUCA.....       | 4  |
| .....GUUGGGAGAUGCUGUGCCUCAGA.....     | 3  |
| .....GUUGGGAGAUGCUGUGCCUCAGAC.....    | 4  |
| .....GUUGGGAGAUGCUGUGCCUCAGACCU.....  | 2  |
| .....UUGGGAGAUGCUGUGC.....            | 2  |
| .....UUGGGAGAUGCUGUGCCU.....          | 6  |
| .....UUGGGAGAUGCUGUGCCUC.....         | 5  |
| .....UUGGGAGAUGCUGUGCCUCA.....        | 6  |
| .....UUGGGAGAUGCUGUGCCUCAG.....       | 6  |
| .....UUGGGAGAUGCUGUGCCUCAGA.....      | 18 |
| .....UUGGGAGAUGCUGUGCCUCAGACCU.....   | 5  |
| .....UUGGGAGAUGCUGUGCCUCAGACCUC.....  | 4  |
| .....UUGGGAGAUGCUGUGCCUCAGACCUCU..... | 5  |
| .....UGGGAGAUGCUGUGCCUC.....          | 5  |
| .....UGGGAGAUGCUGUGCCUCA.....         | 5  |
| .....UGGGAGAUGCUGUGCCUCAGA.....       | 2  |
| .....UGGGAGAUGCUGUGCCUCAGACCU.....    | 7  |
| .....UGGGAGAUGCUGUGCCUCAGACCUC.....   | 5  |
| .....UGGGAGAUGCUGUGCCUCAGACCUCU.....  | 2  |
| .....GGGAGAUGCUGUGCCUC.....           | 4  |
| .....GGGAGAUGCUGUGCCUCA.....          | 3  |
| .....GGGAGAUGCUGUGCCUCAGACCU.....     | 4  |
| .....GGGAGAUGCUGUGCCUCAGACCUC.....    | 2  |
| .....GGAGAUGCUGUGCCUC.....            | 19 |
| .....GGAGAUGCUGUGCCUCA.....           | 8  |
| .....GGAGAUGCUGUGCCUCAG.....          | 4  |
| .....GGAGAUGCUGUGCCUCAGAC.....        | 8  |



|                                      |    |
|--------------------------------------|----|
| .....GGAGAUGCUGGCCUCAGACC.....       | 3  |
| .....GGAGAUGCUGGCCUCAGACCU.....      | 17 |
| .....GGAGAUGCUGGCCUCAGACCUC.....     | 8  |
| .....GGAGAUGCUGGCCUCAGACCUCU.....    | 5  |
| .....GGAGAUGCUGGCCUCAGACCUCUC.....   | 4  |
| .....GGAGAUGCUGGCCUCAGACCUCUCCC..... | 2  |
| .....GAGAUGCUGGCCUCA.....            | 16 |
| .....GAGAUGCUGGCCUCAG.....           | 4  |
| .....GAGAUGCUGGCCUCAGA.....          | 13 |
| .....GAGAUGCUGGCCUCAGAC.....         | 18 |
| .....GAGAUGCUGGCCUCAGACC.....        | 5  |
| .....GAGAUGCUGGCCUCAGACCU.....       | 36 |
| .....GAGAUGCUGGCCUCAGACCUC.....      | 12 |
| .....GAGAUGCUGGCCUCAGACCUCU.....     | 11 |
| .....GAGAUGCUGGCCUCAGACCUCUC.....    | 16 |
| .....GAGAUGCUGGCCUCAGACCUCUCC.....   | 16 |
| .....GAGAUGCUGGCCUCAGACCUCUCCC.....  | 24 |
| .....AGAUGCUGGCCUCAG.....            | 6  |
| .....AGAUGCUGGCCUCAGA.....           | 9  |
| .....AGAUGCUGGCCUCAGAC.....          | 13 |
| .....AGAUGCUGGCCUCAGACC.....         | 5  |
| .....AGAUGCUGGCCUCAGACCU.....        | 30 |
| .....AGAUGCUGGCCUCAGACCUC.....       | 9  |
| .....AGAUGCUGGCCUCAGACCUCU.....      | 7  |
| .....AGAUGCUGGCCUCAGACCUCUC.....     | 7  |
| .....AGAUGCUGGCCUCAGACCUCUCC.....    | 15 |
| .....AGAUGCUGGCCUCAGACCUCUCCC.....   | 7  |
| .....AGAUGCUGGCCUCAGACCUCUCCCAA..... | 2  |
| .....GAUGCUGGCCUCAGA.....            | 5  |
| .....GAUGCUGGCCUCAGAC.....           | 14 |
| .....GAUGCUGGCCUCAGACC.....          | 6  |
| .....GAUGCUGGCCUCAGACCU.....         | 21 |
| .....GAUGCUGGCCUCAGACCUC.....        | 4  |
| .....GAUGCUGGCCUCAGACCUCU.....       | 8  |
| .....GAUGCUGGCCUCAGACCUCUC.....      | 14 |
| .....GAUGCUGGCCUCAGACCUCUCC.....     | 18 |
| .....GAUGCUGGCCUCAGACCUCUCCC.....    | 8  |
| .....AUGCUGGCCUCAGAC.....            | 15 |
| .....AUGCUGGCCUCAGACC.....           | 4  |
| .....AUGCUGGCCUCAGACCU.....          | 22 |
| .....AUGCUGGCCUCAGACCUC.....         | 10 |
| .....AUGCUGGCCUCAGACCUCU.....        | 19 |
| .....AUGCUGGCCUCAGACCUCUC.....       | 16 |
| .....AUGCUGGCCUCAGACCUCUCC.....      | 18 |
| .....AUGCUGGCCUCAGACCUCUCCC.....     | 12 |
| .....AUGCUGGCCUCAGACCUCUCCCAA.....   | 2  |
| .....UGCUGGCCUCAGACC.....            | 6  |

|                                        |    |
|----------------------------------------|----|
| .....UGCUGGCCUCAGACCU.....             | 9  |
| .....UGCUGGCCUCAGACCUC.....            | 3  |
| .....UGCUGGCCUCAGACCUCU.....           | 6  |
| .....UGCUGGCCUCAGACCUCUC.....          | 5  |
| .....UGCUGGCCUCAGACCUCUCC.....         | 2  |
| .....UGCUGGCCUCAGACCUCUCCC.....        | 2  |
| .....GCUGUGGCCUCAGACCU.....            | 20 |
| .....GCUGUGGCCUCAGACCUC.....           | 11 |
| .....GCUGUGGCCUCAGACCUCU.....          | 8  |
| .....GCUGUGGCCUCAGACCUCUC.....         | 8  |
| .....GCUGUGGCCUCAGACCUCUCC.....        | 5  |
| .....GCUGUGGCCUCAGACCUCUCCC.....       | 7  |
| .....GCUGUGGCCUCAGACCUCUCCCAA.....     | 2  |
| .....GCUGUGGCCUCAGACCUCUCCCAAC.....    | 2  |
| .....GCUGUGGCCUCAGACCUCUCCCAACC.....   | 2  |
| .....GCUGUGGCCUCAGACCUCUCCCAACCC.....  | 2  |
| .....GCUGUGGCCUCAGACCUCUCCCAACCCU..... | 3  |
| .....CUGUGGCCUCAGACCUC.....            | 5  |
| .....CUGUGGCCUCAGACCUCU.....           | 9  |
| .....CUGUGGCCUCAGACCUCUC.....          | 14 |
| .....CUGUGGCCUCAGACCUCUCC.....         | 5  |
| .....CUGUGGCCUCAGACCUCUCCC.....        | 11 |
| .....CUGUGGCCUCAGACCUCUCCCAAC.....     | 5  |
| .....CUGUGGCCUCAGACCUCUCCCAACC.....    | 3  |
| .....CUGUGGCCUCAGACCUCUCCCAACCC.....   | 3  |
| .....CUGUGGCCUCAGACCUCUCCCAACCCU.....  | 2  |
| .....CUGUGGCCUCAGACCUCUCCCAACCCUU..... | 11 |
| .....UGUGGCCUCAGACCUCU.....            | 12 |
| .....UGUGGCCUCAGACCUCUC.....           | 9  |
| .....UGUGGCCUCAGACCUCUCC.....          | 8  |
| .....UGUGGCCUCAGACCUCUCCC.....         | 8  |
| .....UGUGGCCUCAGACCUCUCCCAA.....       | 4  |
| .....UGUGGCCUCAGACCUCUCCCAAC.....      | 5  |
| .....UGUGGCCUCAGACCUCUCCCAACC.....     | 10 |
| .....UGUGGCCUCAGACCUCUCCCAACCC.....    | 4  |
| .....UGUGGCCUCAGACCUCUCCCAACCCU.....   | 3  |
| .....UGUGGCCUCAGACCUCUCCCAACCCUU.....  | 10 |
| .....UGUGGCCUCAGACCUCUCCCAACCCUUG..... | 19 |
| .....GUGCCUCAGACCUCUC.....             | 5  |
| .....GUGCCUCAGACCUCUCC.....            | 7  |
| .....GUGCCUCAGACCUCUCCC.....           | 5  |
| .....GUGCCUCAGACCUCUCCCAAC.....        | 3  |
| .....GUGCCUCAGACCUCUCCCAACC.....       | 3  |
| .....GUGCCUCAGACCUCUCCCAACCC.....      | 3  |
| .....GUGCCUCAGACCUCUCCCAACCCU.....     | 6  |
| .....GUGCCUCAGACCUCUCCCAACCCUU.....    | 9  |
| .....GUGCCUCAGACCUCUCCCAACCCUUG.....   | 8  |

|                                       |     |
|---------------------------------------|-----|
| .....GUGCCUCAGACCUCUCCCAACCCUUGU..... | 8   |
| .....UGCCUCAGACCUCUCC.....            | 9   |
| .....UGCCUCAGACCUCUCCC.....           | 10  |
| .....UGCCUCAGACCUCUCCCAA.....         | 10  |
| .....UGCCUCAGACCUCUCCCAAC.....        | 5   |
| .....UGCCUCAGACCUCUCCCAACC.....       | 4   |
| .....UGCCUCAGACCUCUCCCAACCC.....      | 2   |
| .....UGCCUCAGACCUCUCCCAACCCU.....     | 7   |
| .....UGCCUCAGACCUCUCCCAACCCUU.....    | 8   |
| .....UGCCUCAGACCUCUCCCAACCCUUG.....   | 18  |
| .....UGCCUCAGACCUCUCCCAACCCUUGU.....  | 7   |
| .....UGCCUCAGACCUCUCCCAACCCUUGUA..... | 14  |
| .....GCCUCAGACCUCUCCC.....            | 3   |
| .....GCCUCAGACCUCUCCCAACC.....        | 3   |
| .....GCCUCAGACCUCUCCCAACCCUU.....     | 4   |
| .....GCCUCAGACCUCUCCCAACCCUUG.....    | 7   |
| .....GCCUCAGACCUCUCCCAACCCUUGU.....   | 12  |
| .....GCCUCAGACCUCUCCCAACCCUUGUA.....  | 11  |
| .....GCCUCAGACCUCUCCCAACCCUUGUAC..... | 10  |
| .....CCUCAGACCUCUCCCAA.....           | 3   |
| .....CCUCAGACCUCUCCCAACC.....         | 2   |
| .....CCUCAGACCUCUCCCAACCC.....        | 2   |
| .....CCUCAGACCUCUCCCAACCCUU.....      | 5   |
| .....CCUCAGACCUCUCCCAACCCUUG.....     | 7   |
| .....CCUCAGACCUCUCCCAACCCUUGU.....    | 18  |
| .....CCUCAGACCUCUCCCAACCCUUGUA.....   | 14  |
| .....CCUCAGACCUCUCCCAACCCUUGUAC.....  | 13  |
| .....CCUCAGACCUCUCCCAACCCUUGUACC..... | 52  |
| .....CUCAGACCUCUCCCAAC.....           | 4   |
| .....CUCAGACCUCUCCCAACC.....          | 2   |
| .....CUCAGACCUCUCCCAACCCU.....        | 2   |
| .....CUCAGACCUCUCCCAACCCUU.....       | 9   |
| .....CUCAGACCUCUCCCAACCCUUG.....      | 18  |
| .....CUCAGACCUCUCCCAACCCUUGU.....     | 29  |
| .....CUCAGACCUCUCCCAACCCUUGUA.....    | 35  |
| .....CUCAGACCUCUCCCAACCCUUGUAC.....   | 39  |
| .....CUCAGACCUCUCCCAACCCUUGUACC.....  | 155 |
| .....CUCAGACCUCUCCCAACCCUUGUACCA..... | 791 |
| .....UCAGACCUCUCCCAAC.....            | 4   |
| .....UCAGACCUCUCCCAACC.....           | 3   |
| .....UCAGACCUCUCCCAACCC.....          | 5   |
| .....UCAGACCUCUCCCAACCCU.....         | 2   |
| .....UCAGACCUCUCCCAACCCUU.....        | 5   |
| .....UCAGACCUCUCCCAACCCUUG.....       | 9   |
| .....UCAGACCUCUCCCAACCCUUGU.....      | 8   |
| .....UCAGACCUCUCCCAACCCUUGUA.....     | 9   |
| .....UCAGACCUCUCCCAACCCUUGUAC.....    | 23  |

|                                                                          |           |
|--------------------------------------------------------------------------|-----------|
| .....UCAGACCUCUCCCAACCCUUGUACC.....                                      | 48        |
| .....UCAGACCUCUCCCAACCCUUGUACCA.....                                     | 275       |
| .....UCAGACCUCUCCCAACCCUUGUACCAU....                                     | 495       |
| .....CAGACCUCUCCCAACC.....                                               | 6         |
| .....CAGACCUCUCCCAACCC.....                                              | 20        |
| .....CAGACCUCUCCCAACCCU.....                                             | 9         |
| .....CAGACCUCUCCCAACCCUU.....                                            | 5         |
| .....CAGACCUCUCCCAACCCUUG.....                                           | 8         |
| .....CAGACCUCUCCCAACCCUUGU.....                                          | 16        |
| .....CAGACCUCUCCCAACCCUUGUA.....                                         | 12        |
| .....CAGACCUCUCCCAACCCUUGUAC.....                                        | 25        |
| .....CAGACCUCUCCCAACCCUUGUACC.....                                       | 55        |
| .....CAGACCUCUCCCAACCCUUGUACCA.....                                      | 282       |
| .....CAGACCUCUCCCAACCCUUGUACCAU....                                      | 466       |
| .....CAGACCUCUCCCAACCCUUGUACCAUU...<br>.....AGACCUCUCCCAACCC.....        | 361<br>23 |
| .....AGACCUCUCCCAACCCU.....                                              | 23        |
| .....AGACCUCUCCCAACCCUU.....                                             | 8         |
| .....AGACCUCUCCCAACCCUUG.....                                            | 19        |
| .....AGACCUCUCCCAACCCUUGU.....                                           | 7         |
| .....AGACCUCUCCCAACCCUUGUA.....                                          | 19        |
| .....AGACCUCUCCCAACCCUUGUAC.....                                         | 14        |
| .....AGACCUCUCCCAACCCUUGUACC.....                                        | 18        |
| .....AGACCUCUCCCAACCCUUGUACCA.....                                       | 91        |
| .....AGACCUCUCCCAACCCUUGUACCAU....                                       | 174       |
| .....AGACCUCUCCCAACCCUUGUACCAUU...<br>.....AGACCUCUCCCAACCCUUGUACCAUUU.. | 153<br>55 |
| .....GACCUCUCCCAACCCU.....                                               | 6         |
| .....GACCUCUCCCAACCCUU.....                                              | 5         |
| .....GACCUCUCCCAACCCUUG.....                                             | 5         |
| .....GACCUCUCCCAACCCUUGU.....                                            | 5         |
| .....GACCUCUCCCAACCCUUGUA.....                                           | 9         |
| .....GACCUCUCCCAACCCUUGUAC.....                                          | 11        |
| .....GACCUCUCCCAACCCUUGUACC.....                                         | 16        |
| .....GACCUCUCCCAACCCUUGUACCA.....                                        | 52        |
| .....GACCUCUCCCAACCCUUGUACCAU....                                        | 90        |
| .....GACCUCUCCCAACCCUUGUACCAUU...<br>.....GACCUCUCCCAACCCUUGUACCAUUU..   | 77<br>29  |
| .....GACCUCUCCCAACCCUUGUACCAUUUU..                                       | 3         |
| .....ACCUCUCCCAACCCUU.....                                               | 2         |
| .....ACCUCUCCCAACCCUUG.....                                              | 10        |
| .....ACCUCUCCCAACCCUUGU.....                                             | 7         |
| .....ACCUCUCCCAACCCUUGUA.....                                            | 5         |
| .....ACCUCUCCCAACCCUUGUAC.....                                           | 13        |
| .....ACCUCUCCCAACCCUUGUACC.....                                          | 17        |
| .....ACCUCUCCCAACCCUUGUACCA.....                                         | 90        |
| .....ACCUCUCCCAACCCUUGUACCAU....                                         | 116       |

|                                  |       |
|----------------------------------|-------|
| .....ACCUCUCCCAACCCUUGUACCAUU... | 111   |
| .....ACCUCUCCCAACCCUUGUACCAUUU.. | 40    |
| .....ACCUCUCCCAACCCUUGUACCAUUUU. | 10    |
| .....ACCUCUCCCAACCCUUGUACCAUUUUU | 4     |
| .....CCUCUCCCAACCCUUG.....       | 7     |
| .....CCUCUCCCAACCCUUGU.....      | 9     |
| .....CCUCUCCCAACCCUUGUA.....     | 15    |
| .....CCUCUCCCAACCCUUGUAC.....    | 11    |
| .....CCUCUCCCAACCCUUGUACC.....   | 26    |
| .....CCUCUCCCAACCCUUGUACCA.....  | 199   |
| .....CCUCUCCCAACCCUUGUACCAU....  | 376   |
| .....CCUCUCCCAACCCUUGUACCAUU...  | 102   |
| .....CCUCUCCCAACCCUUGUACCAUUU..  | 38    |
| .....CCUCUCCCAACCCUUGUACCAUUUU.  | 10    |
| .....CCUCUCCCAACCCUUGUACCAUUUUU  | 4     |
| .....CUCUCCCAACCCUUGU.....       | 12    |
| .....CUCUCCCAACCCUUGUA.....      | 57    |
| .....CUCUCCCAACCCUUGUAC.....     | 48    |
| .....CUCUCCCAACCCUUGUACC.....    | 77    |
| .....CUCUCCCAACCCUUGUACCA.....   | 454   |
| .....CUCUCCCAACCCUUGUACCAU....   | 3137  |
| .....CUCUCCCAACCCUUGUACCAUU...   | 3479  |
| .....CUCUCCCAACCCUUGUACCAUUU..   | 344   |
| .....CUCUCCCAACCCUUGUACCAUUUU.   | 36    |
| .....CUCUCCCAACCCUUGUACCAUUUUU   | 11    |
| .....UCUCCCAACCCUUGUA.....       | 98    |
| .....UCUCCCAACCCUUGUAC.....      | 99    |
| .....UCUCCCAACCCUUGUACC.....     | 281   |
| .....UCUCCCAACCCUUGUACCA.....    | 1099  |
| .....UCUCCCAACCCUUGUACCAU....    | 5219  |
| .....UCUCCCAACCCUUGUACCAUU...    | 24059 |
| .....UCUCCCAACCCUUGUACCAUUU..    | 27059 |
| .....UCUCCCAACCCUUGUACCAUUUU.    | 2290  |
| .....UCUCCCAACCCUUGUACCAUUUUU    | 314   |
| .....CUCCCAACCCUUGUAC.....       | 27    |
| .....CUCCCAACCCUUGUACC.....      | 25    |
| .....CUCCCAACCCUUGUACCA.....     | 157   |
| .....CUCCCAACCCUUGUACCAU....     | 194   |
| .....CUCCCAACCCUUGUACCAUU...     | 504   |
| .....CUCCCAACCCUUGUACCAUUU..     | 553   |
| .....CUCCCAACCCUUGUACCAUUUU.     | 94    |
| .....CUCCCAACCCUUGUACCAUUUUU     | 19    |
| .....UCCCAACCCUUGUACC.....       | 10    |
| .....UCCCAACCCUUGUACCA.....      | 82    |
| .....UCCCAACCCUUGUACCAU....      | 74    |
| .....UCCCAACCCUUGUACCAUU...      | 202   |
| .....UCCCAACCCUUGUACCAUUU..      | 253   |

|                             |     |
|-----------------------------|-----|
| .....UCCCAACCCUUGUACCAUUUU. | 121 |
| .....UCCCAACCCUUGUACCAUUUUU | 22  |
| .....CCCAACCCUUGUACCA.....  | 77  |
| .....CCCAACCCUUGUACCAU..... | 44  |
| .....CCCAACCCUUGUACCAUU...  | 97  |
| .....CCCAACCCUUGUACCAUUU..  | 98  |
| .....CCCAACCCUUGUACCAUUUU.  | 13  |
| .....CCAACCCUUGUACCAU.....  | 32  |
| .....CCAACCCUUGUACCAUU...   | 103 |
| .....CCAACCCUUGUACCAUUU..   | 110 |
| .....CCAACCCUUGUACCAUUUU.   | 8   |
| .....CCAACCCUUGUACCAUUUUU   | 3   |
| .....CAACCCUUGUACCAU.....   | 117 |
| .....CAACCCUUGUACCAUUU..    | 149 |
| .....CAACCCUUGUACCAUUUU.    | 13  |
| .....CAACCCUUGUACCAUUUUU    | 5   |
| .....AACCCUUGUACCAUUU..     | 238 |
| .....AACCCUUGUACCAUUUU.     | 27  |
| .....AACCCUUGUACCAUUUUU     | 5   |
| .....ACCCUUGUACCAUUUU.      | 5   |
| .....ACCCUUGUACCAUUUUU      | 2   |

**#shR-miR-122**

|                                                                  | Reads  |
|------------------------------------------------------------------|--------|
| UUAUGGAGUGUGACAAUGGUGUUUGUGUCUAAACUAUCAAACACCAUUGUCACACUCCAUUUUU |        |
| UUAUGGAGUGUGACAAUGGUGUU.....                                     | 10     |
| UUAUGGAGUGUGACAAUGGUGUUU.....                                    | 28     |
| .UAUGGAGUGUGACAAUGGUGUU.....                                     | 13     |
| .UAUGGAGUGUGACAAUGGUGUUU.....                                    | 15     |
| ..AUGGAGUGUGACAAU.....                                           | 2      |
| ..AUGGAGUGUGACAAUG.....                                          | 665    |
| ..AUGGAGUGUGACAAUGG.....                                         | 1751   |
| ..AUGGAGUGUGACAAUGGU.....                                        | 823    |
| ..AUGGAGUGUGACAAUGGUG.....                                       | 2119   |
| ..AUGGAGUGUGACAAUGGUGU.....                                      | 6596   |
| ..AUGGAGUGUGACAAUGGUGUU.....                                     | 37977  |
| ..AUGGAGUGUGACAAUGGUGUUU.....                                    | 127328 |
| ..AUGGAGUGUGACAAUGGUGUUUG.....                                   | 5119   |
| ..AUGGAGUGUGACAAUGGUGUUUGU.....                                  | 4322   |
| ..AUGGAGUGUGACAAUGGUGUUUGUG.....                                 | 201    |
| ..AUGGAGUGUGACAAUGGUGUUUGUGU.....                                | 350    |
| ..AUGGAGUGUGACAAUGGUGUUUGUGUC.....                               | 280    |
| ...UGGAGUGUGACAAUGG.....                                         | 26     |
| ...UGGAGUGUGACAAUGGU.....                                        | 18     |
| ...UGGAGUGUGACAAUGGUG.....                                       | 43     |
| ...UGGAGUGUGACAAUGGUGU.....                                      | 77     |
| ...UGGAGUGUGACAAUGGUGUU.....                                     | 307    |
| ...UGGAGUGUGACAAUGGUGUUU.....                                    | 1441   |

|                                           |      |
|-------------------------------------------|------|
| ... UGGAGUGUGACAAUGGUGUUUG . . . . .      | 249  |
| ... UGGAGUGUGACAAUGGUGUUUGU . . . . .     | 214  |
| ... UGGAGUGUGACAAUGGUGUUUGUG . . . . .    | 8    |
| ... UGGAGUGUGACAAUGGUGUUUGUGU . . . . .   | 2    |
| ... UGGAGUGUGACAAUGGUGUUUGUGUCU . . . . . | 4    |
| ... GGAGUGUGACAAUGGU . . . . .            | 63   |
| ... GGAGUGUGACAAUGGUG . . . . .           | 181  |
| ... GGAGUGUGACAAUGGUGU . . . . .          | 221  |
| ... GGAGUGUGACAAUGGUGUU . . . . .         | 359  |
| ... GGAGUGUGACAAUGGUGUUU . . . . .        | 1423 |
| ... GGAGUGUGACAAUGGUGUUUG . . . . .       | 960  |
| ... GGAGUGUGACAAUGGUGUUUGU . . . . .      | 753  |
| ... GGAGUGUGACAAUGGUGUUUGUG . . . . .     | 39   |
| ... GGAGUGUGACAAUGGUGUUUGUGU . . . . .    | 80   |
| ... GGAGUGUGACAAUGGUGUUUGUGUC . . . . .   | 46   |
| ... GGAGUGUGACAAUGGUGUUUGUGUCU . . . . .  | 163  |
| ... GGAGUGUGACAAUGGUGUUUGUGUCUA . . . . . | 42   |
| ... GAGUGUGACAAUGGUG . . . . .            | 30   |
| ... GAGUGUGACAAUGGUGU . . . . .           | 29   |
| ... GAGUGUGACAAUGGUGUU . . . . .          | 29   |
| ... GAGUGUGACAAUGGUGUUU . . . . .         | 87   |
| ... GAGUGUGACAAUGGUGUUUG . . . . .        | 55   |
| ... GAGUGUGACAAUGGUGUUUGU . . . . .       | 39   |
| ... GAGUGUGACAAUGGUGUUUGUG . . . . .      | 6    |
| ... GAGUGUGACAAUGGUGUUUGUGU . . . . .     | 17   |
| ... GAGUGUGACAAUGGUGUUUGUGUC . . . . .    | 10   |
| ... GAGUGUGACAAUGGUGUUUGUGUCU . . . . .   | 19   |
| ... GAGUGUGACAAUGGUGUUUGUGUCUA . . . . .  | 4    |
| ... GAGUGUGACAAUGGUGUUUGUGUCUAA . . . . . | 3    |
| ... AGUGUGACAAUGGUGU . . . . .            | 15   |
| ... AGUGUGACAAUGGUGUU . . . . .           | 34   |
| ... AGUGUGACAAUGGUGUUU . . . . .          | 38   |
| ... AGUGUGACAAUGGUGUUUG . . . . .         | 14   |
| ... AGUGUGACAAUGGUGUUUGU . . . . .        | 7    |
| ... AGUGUGACAAUGGUGUUUGUG . . . . .       | 6    |
| ... AGUGUGACAAUGGUGUUUGUGU . . . . .      | 7    |
| ... AGUGUGACAAUGGUGUUUGUGUCU . . . . .    | 3    |
| ... GUGUGACAAUGGUGUU . . . . .            | 23   |
| ... GUGUGACAAUGGUGUUU . . . . .           | 36   |
| ... GUGUGACAAUGGUGUUUG . . . . .          | 7    |
| ... GUGUGACAAUGGUGUUUGU . . . . .         | 10   |
| ... GUGUGACAAUGGUGUUUGUG . . . . .        | 2    |
| ... GUGUGACAAUGGUGUUUGUGU . . . . .       | 3    |
| ... GUGUGACAAUGGUGUUUGUGUC . . . . .      | 4    |
| ... GUGUGACAAUGGUGUUUGUGUCU . . . . .     | 9    |
| ... GUGUGACAAUGGUGUUUGUGUCUA . . . . .    | 2    |
| ... GUGUGACAAUGGUGUUUGUGUCUAAA . . . . .  | 2    |

|                                       |    |
|---------------------------------------|----|
| .....UGUGACAAUGGUGUUU.....            | 30 |
| .....UGUGACAAUGGUGUUUG.....           | 12 |
| .....UGUGACAAUGGUGUUUGU.....          | 5  |
| .....UGUGACAAUGGUGUUUGUG.....         | 5  |
| .....UGUGACAAUGGUGUUUGUGU.....        | 4  |
| .....UGUGACAAUGGUGUUUGUGUC.....       | 5  |
| .....UGUGACAAUGGUGUUUGUGUCU.....      | 2  |
| .....UGUGACAAUGGUGUUUGUGUCUAA.....    | 2  |
| .....UGUGACAAUGGUGUUUGUGUCUAAAC.....  | 3  |
| .....GUGACAAUGGUGUUUG.....            | 7  |
| .....GUGACAAUGGUGUUUGUGUC.....        | 2  |
| .....GUGACAAUGGUGUUUGUGUCU.....       | 2  |
| .....GUGACAAUGGUGUUUGUGUCUA.....      | 2  |
| .....UGACAAUGGUGUUUGUGUCUAAA.....     | 2  |
| .....UGACAAUGGUGUUUGUGUCUAAACUAU..... | 2  |
| .....GACAAUGGUGUUUGUG.....            | 2  |
| .....GACAAUGGUGUUUGUGUCUAAAC.....     | 2  |
| .....GACAAUGGUGUUUGUGUCUAAACUAU.....  | 2  |
| .....GACAAUGGUGUUUGUGUCUAAACUAUC..... | 4  |
| .....ACAAUGGUGUUUGUGUCUAAA.....       | 4  |
| .....ACAAUGGUGUUUGUGUCUAAACUAUC.....  | 2  |
| .....ACAAUGGUGUUUGUGUCUAAACUAUCA..... | 2  |
| .....CAAUGGUGUUUGUGUC.....            | 2  |
| .....CAAUGGUGUUUGUGUCUAAA.....        | 2  |
| .....CAAUGGUGUUUGUGUCUAAAC.....       | 3  |
| .....CAAUGGUGUUUGUGUCUAAACUAU.....    | 2  |
| .....CAAUGGUGUUUGUGUCUAAACUAUC.....   | 3  |
| .....AAUGGUGUUUGUGUCU.....            | 2  |
| .....AAUGGUGUUUGUGUCUAAA.....         | 7  |
| .....AAUGGUGUUUGUGUCUAAACUAU.....     | 5  |
| .....AAUGGUGUUUGUGUCUAAACUAUC.....    | 11 |
| .....AAUGGUGUUUGUGUCUAAACUAUCAAA..... | 2  |
| .....AUGGUGUUUGUGUCUA.....            | 4  |
| .....AUGGUGUUUGUGUCUAA.....           | 2  |
| .....AUGGUGUUUGUGUCUAAA.....          | 2  |
| .....AUGGUGUUUGUGUCUAAACUAU.....      | 4  |
| .....AUGGUGUUUGUGUCUAAACUAUC.....     | 5  |
| .....AUGGUGUUUGUGUCUAAACUAUCA.....    | 5  |
| .....AUGGUGUUUGUGUCUAAACUAUCAAA.....  | 2  |
| .....UGGUGUUUGUGUCUAA.....            | 4  |
| .....UGGUGUUUGUGUCUAAA.....           | 6  |
| .....UGGUGUUUGUGUCUAAACUAUC.....      | 2  |
| .....UGGUGUUUGUGUCUAAACUAUCA.....     | 2  |
| .....UGGUGUUUGUGUCUAAACUAUCAAA.....   | 5  |
| .....UGGUGUUUGUGUCUAAACUAUCAAAC.....  | 4  |
| .....UGGUGUUUGUGUCUAAACUAUCAACA.....  | 8  |
| .....GGUGUUUGUGUCUAAA.....            | 3  |



|                                        |     |
|----------------------------------------|-----|
| .....GGUGUUUGUGUCUAAAC.....            | 2   |
| .....GGUGUUUGUGUCUAAACUAU.....         | 2   |
| .....GGUGUUUGUGUCUAAACUAUC.....        | 4   |
| .....GGUGUUUGUGUCUAAACUAUCA.....       | 4   |
| .....GGUGUUUGUGUCUAAACUAUCAA.....      | 4   |
| .....GGUGUUUGUGUCUAAACUAUCAAA.....     | 8   |
| .....GGUGUUUGUGUCUAAACUAUCAAAAC.....   | 7   |
| .....GUGUUUGUGUCUAAAC.....             | 12  |
| .....GUGUUUGUGUCUAAACU.....            | 2   |
| .....GUGUUUGUGUCUAAACUAU.....          | 5   |
| .....GUGUUUGUGUCUAAACUAUC.....         | 34  |
| .....GUGUUUGUGUCUAAACUAUCA.....        | 10  |
| .....GUGUUUGUGUCUAAACUAUCA.....        | 2   |
| .....GUGUUUGUGUCUAAACUAUCAA.....       | 18  |
| .....GUGUUUGUGUCUAAACUAUCAAA.....      | 5   |
| .....GUGUUUGUGUCUAAACUAUCAAAAC.....    | 7   |
| .....GUGUUUGUGUCUAAACUAUCAAAACAC.....  | 8   |
| .....GUGUUUGUGUCUAAACUAUCAAAACACC..... | 7   |
| .....UGUUUGUGUCUAAACU.....             | 2   |
| .....UGUUUGUGUCUAAACUA.....            | 2   |
| .....UGUUUGUGUCUAAACUAU.....           | 7   |
| .....UGUUUGUGUCUAAACUAUC.....          | 28  |
| .....UGUUUGUGUCUAAACUAUCA.....         | 4   |
| .....UGUUUGUGUCUAAACUAUCAA.....        | 5   |
| .....UGUUUGUGUCUAAACUAUCAAAAC.....     | 2   |
| .....UGUUUGUGUCUAAACUAUCAAAACAC.....   | 3   |
| .....UGUUUGUGUCUAAACUAUCAAAACACC.....  | 16  |
| .....UGUUUGUGUCUAAACUAUCAAAACACCA..... | 2   |
| .....GUUUGUGUCUAAACUAU.....            | 7   |
| .....GUUUGUGUCUAAACUAUC.....           | 44  |
| .....GUUUGUGUCUAAACUAUCAA.....         | 11  |
| .....GUUUGUGUCUAAACUAUCAAAAC.....      | 5   |
| .....GUUUGUGUCUAAACUAUCAAAACA.....     | 5   |
| .....GUUUGUGUCUAAACUAUCAAAACAC.....    | 16  |
| .....GUUUGUGUCUAAACUAUCAAAACACC.....   | 11  |
| .....UUUGUGUCUAAACUAU.....             | 38  |
| .....UUUGUGUCUAAACUAUC.....            | 147 |
| .....UUUGUGUCUAAACUAUCA.....           | 10  |
| .....UUUGUGUCUAAACUAUCA.....           | 14  |
| .....UUUGUGUCUAAACUAUCAA.....          | 10  |
| .....UUUGUGUCUAAACUAUCAAAAC.....       | 12  |
| .....UUUGUGUCUAAACUAUCAAAACA.....      | 13  |
| .....UUUGUGUCUAAACUAUCAAAACAC.....     | 21  |
| .....UUUGUGUCUAAACUAUCAAAACACC.....    | 18  |
| .....UUUGUGUCUAAACUAUCAAAACACCA.....   | 3   |
| .....UUUGUGUCUAAACUAUCAAAACACCAU.....  | 3   |
| .....UUUGUGUCUAAACUAUCAAAACACCAUU..... | 5   |

|                                        |      |
|----------------------------------------|------|
| .....UUGUGUCUAAACUAUC.....             | 56   |
| .....UUGUGUCUAAACUAUCA.....            | 9    |
| .....UUGUGUCUAAACUAUCAA.....           | 2    |
| .....UUGUGUCUAAACUAUCAAAA.....         | 17   |
| .....UUGUGUCUAAACUAUCAAAAC.....        | 22   |
| .....UUGUGUCUAAACUAUCAAAACA.....       | 10   |
| .....UUGUGUCUAAACUAUCAAAACAC.....      | 29   |
| .....UUGUGUCUAAACUAUCAAAACACC.....     | 28   |
| .....UUGUGUCUAAACUAUCAAAACACCAU.....   | 4    |
| .....UUGUGUCUAAACUAUCAAAACACCAUU.....  | 10   |
| .....UUGUGUCUAAACUAUCAAAACACCAUUG..... | 3    |
| .....UGUGUCUAAACUAUCA.....             | 13   |
| .....UGUGUCUAAACUAUCAA.....            | 11   |
| .....UGUGUCUAAACUAUCAAAA.....          | 1289 |
| .....UGUGUCUAAACUAUCAAAAC.....         | 17   |
| .....UGUGUCUAAACUAUCAAAACA.....        | 22   |
| .....UGUGUCUAAACUAUCAAAACAC.....       | 27   |
| .....UGUGUCUAAACUAUCAAAACACC.....      | 27   |
| .....UGUGUCUAAACUAUCAAAACACCA.....     | 2    |
| .....UGUGUCUAAACUAUCAAAACACCAU.....    | 6    |
| .....UGUGUCUAAACUAUCAAAACACCAUU.....   | 11   |
| .....UGUGUCUAAACUAUCAAAACACCAUUG.....  | 2    |
| .....UGUGUCUAAACUAUCAAAACACCAUUGU..... | 9    |
| .....GUGUCUAAACUAUCAA.....             | 104  |
| .....GUGUCUAAACUAUCAAAA.....           | 30   |
| .....GUGUCUAAACUAUCAAAAC.....          | 10   |
| .....GUGUCUAAACUAUCAAAACA.....         | 5    |
| .....GUGUCUAAACUAUCAAAACAC.....        | 22   |
| .....GUGUCUAAACUAUCAAAACACC.....       | 16   |
| .....GUGUCUAAACUAUCAAAACACCA.....      | 2    |
| .....GUGUCUAAACUAUCAAAACACCAU.....     | 4    |
| .....GUGUCUAAACUAUCAAAACACCAUU.....    | 8    |
| .....GUGUCUAAACUAUCAAAACACCAUUGU.....  | 3    |
| .....GUGUCUAAACUAUCAAAACACCAUUGUC..... | 4    |
| .....UGUCUAAACUAUCAAAA.....            | 18   |
| .....UGUCUAAACUAUCAAAAC.....           | 19   |
| .....UGUCUAAACUAUCAAAACA.....          | 17   |
| .....UGUCUAAACUAUCAAAACAC.....         | 44   |
| .....UGUCUAAACUAUCAAAACACC.....        | 28   |
| .....UGUCUAAACUAUCAAAACACCA.....       | 6    |
| .....UGUCUAAACUAUCAAAACACCAU.....      | 16   |
| .....UGUCUAAACUAUCAAAACACCAUU.....     | 9    |
| .....UGUCUAAACUAUCAAAACACCAUUG.....    | 14   |
| .....UGUCUAAACUAUCAAAACACCAUUGU.....   | 11   |
| .....UGUCUAAACUAUCAAAACACCAUUGUC.....  | 13   |
| .....UGUCUAAACUAUCAAAACACCAUUGUCA..... | 6    |
| .....GUCUAAACUAUCAAAAC.....            | 7    |

|                                        |    |
|----------------------------------------|----|
| .....GUCUAAACUAUCAAAACA.....           | 8  |
| .....GUCUAAACUAUCAAAACAC.....          | 8  |
| .....GUCUAAACUAUCAAAACACC.....         | 7  |
| .....GUCUAAACUAUCAAAACACCAU.....       | 5  |
| .....GUCUAAACUAUCAAAACACCAUU.....      | 4  |
| .....GUCUAAACUAUCAAAACACCAUUGU.....    | 5  |
| .....GUCUAAACUAUCAAAACACCAUUGUC.....   | 2  |
| .....GUCUAAACUAUCAAAACACCAUUGUCA.....  | 6  |
| .....GUCUAAACUAUCAAAACACCAUUGUCAC..... | 6  |
| .....UCUAAACUAUCAAAACA.....            | 3  |
| .....UCUAAACUAUCAAAACAC.....           | 6  |
| .....UCUAAACUAUCAAAACACC.....          | 9  |
| .....UCUAAACUAUCAAAACACCA.....         | 3  |
| .....UCUAAACUAUCAAAACACCAU.....        | 3  |
| .....UCUAAACUAUCAAAACACCAUU.....       | 4  |
| .....UCUAAACUAUCAAAACACCAUUG.....      | 3  |
| .....UCUAAACUAUCAAAACACCAUUGU.....     | 6  |
| .....UCUAAACUAUCAAAACACCAUUGUC.....    | 3  |
| .....UCUAAACUAUCAAAACACCAUUGUCA.....   | 2  |
| .....UCUAAACUAUCAAAACACCAUUGUCAC.....  | 6  |
| .....UCUAAACUAUCAAAACACCAUUGUCACA..... | 8  |
| .....CUAAACUAUCAAAACAC.....            | 2  |
| .....CUAAACUAUCAAAACACC.....           | 7  |
| .....CUAAACUAUCAAAACACCA.....          | 3  |
| .....CUAAACUAUCAAAACACCAU.....         | 2  |
| .....CUAAACUAUCAAAACACCAUUG.....       | 2  |
| .....CUAAACUAUCAAAACACCAUUGU.....      | 9  |
| .....CUAAACUAUCAAAACACCAUUGUC.....     | 3  |
| .....CUAAACUAUCAAAACACCAUUGUCA.....    | 2  |
| .....CUAAACUAUCAAAACACCAUUGUCAC.....   | 5  |
| .....CUAAACUAUCAAAACACCAUUGUCACA.....  | 10 |
| .....CUAAACUAUCAAAACACCAUUGUCACAC..... | 12 |
| .....UAAACUAUCAAAACACC.....            | 7  |
| .....UAAACUAUCAAAACACCA.....           | 4  |
| .....UAAACUAUCAAAACACCAUUG.....        | 3  |
| .....UAAACUAUCAAAACACCAUUGUCAC.....    | 3  |
| .....UAAACUAUCAAAACACCAUUGUCACA.....   | 4  |
| .....UAAACUAUCAAAACACCAUUGUCACAC.....  | 12 |
| .....UAAACUAUCAAAACACCAUUGUCACACU..... | 6  |
| .....AAACUAUCAAAACACCAU.....           | 2  |
| .....AAACUAUCAAAACACCAUUG.....         | 3  |
| .....AAACUAUCAAAACACCAUUGU.....        | 3  |
| .....AAACUAUCAAAACACCAUUGUCAC.....     | 6  |
| .....AAACUAUCAAAACACCAUUGUCACA.....    | 7  |
| .....AAACUAUCAAAACACCAUUGUCACAC.....   | 10 |
| .....AAACUAUCAAAACACCAUUGUCACACU.....  | 8  |
| .....AAACUAUCAAAACACCAUUGUCACACUC..... | 12 |

|                                       |       |
|---------------------------------------|-------|
| .....AACUAUCAAACACCAU.....            | 2     |
| .....AACUAUCAAACACCAUU.....           | 2     |
| .....AACUAUCAAACACCAUUG.....          | 2     |
| .....AACUAUCAAACACCAUUGU.....         | 10    |
| .....AACUAUCAAACACCAUUGUCA.....       | 3     |
| .....AACUAUCAAACACCAUUGUCAC.....      | 2     |
| .....AACUAUCAAACACCAUUGUCACA.....     | 8     |
| .....AACUAUCAAACACCAUUGUCACAC.....    | 9     |
| .....AACUAUCAAACACCAUUGUCACACU.....   | 11    |
| .....AACUAUCAAACACCAUUGUCACACUC.....  | 10    |
| .....AACUAUCAAACACCAUUGUCACACUCC..... | 18    |
| .....ACUAUCAAACACCAUU.....            | 6     |
| .....ACUAUCAAACACCAUUG.....           | 4     |
| .....ACUAUCAAACACCAUUGU.....          | 8     |
| .....ACUAUCAAACACCAUUGUC.....         | 3     |
| .....ACUAUCAAACACCAUUGUCAC.....       | 4     |
| .....ACUAUCAAACACCAUUGUCACA.....      | 4     |
| .....ACUAUCAAACACCAUUGUCACAC.....     | 14    |
| .....ACUAUCAAACACCAUUGUCACACU.....    | 7     |
| .....ACUAUCAAACACCAUUGUCACACUC.....   | 15    |
| .....ACUAUCAAACACCAUUGUCACACUCC.....  | 22    |
| .....ACUAUCAAACACCAUUGUCACACUCCA..... | 131   |
| .....CUAUCAAACACCAUUG.....            | 17    |
| .....CUAUCAAACACCAUUGU.....           | 22    |
| .....CUAUCAAACACCAUUGUCA.....         | 10    |
| .....CUAUCAAACACCAUUGUCAC.....        | 13    |
| .....CUAUCAAACACCAUUGUCACA.....       | 27    |
| .....CUAUCAAACACCAUUGUCACAC.....      | 62    |
| .....CUAUCAAACACCAUUGUCACACU.....     | 74    |
| .....CUAUCAAACACCAUUGUCACACUC.....    | 88    |
| .....CUAUCAAACACCAUUGUCACACUCC.....   | 154   |
| .....CUAUCAAACACCAUUGUCACACUCCA.....  | 1023  |
| .....CUAUCAAACACCAUUGUCACACUCCA.....  | 2313  |
| .....UAUCAAACACCAUUGU.....            | 69    |
| .....UAUCAAACACCAUUGUC.....           | 15    |
| .....UAUCAAACACCAUUGUCA.....          | 26    |
| .....UAUCAAACACCAUUGUCAC.....         | 34    |
| .....UAUCAAACACCAUUGUCACA.....        | 74    |
| .....UAUCAAACACCAUUGUCACAC.....       | 88    |
| .....UAUCAAACACCAUUGUCACACU.....      | 133   |
| .....UAUCAAACACCAUUGUCACACUC.....     | 159   |
| .....UAUCAAACACCAUUGUCACACUCC.....    | 269   |
| .....UAUCAAACACCAUUGUCACACUCCA.....   | 1752  |
| .....UAUCAAACACCAUUGUCACACUCCA.....   | 4237  |
| .....UAUCAAACACCAUUGUCACACUCCA.....   | 13404 |
| .....AUCAAACACCAUUGUCA.....           | 5     |
| .....AUCAAACACCAUUGUCAC.....          | 11    |

|                                    |      |
|------------------------------------|------|
| .....AUCAAACACCAUUGUCACA.....      | 20   |
| .....AUCAAACACCAUUGUCACAC.....     | 19   |
| .....AUCAAACACCAUUGUCACACU.....    | 34   |
| .....AUCAAACACCAUUGUCACACUC.....   | 40   |
| .....AUCAAACACCAUUGUCACACUCC.....  | 48   |
| .....AUCAAACACCAUUGUCACACUCCA..... | 316  |
| .....AUCAAACACCAUUGUCACACUCCA..... | 789  |
| .....AUCAAACACCAUUGUCACACUCCA..... | 2774 |
| .....AUCAAACACCAUUGUCACACUCCA..... | 2527 |
| .....UCAAAACACCAUUGUCAC.....       | 7    |
| .....UCAAAACACCAUUGUCACA.....      | 5    |
| .....UCAAAACACCAUUGUCACAC.....     | 16   |
| .....UCAAAACACCAUUGUCACACU.....    | 11   |
| .....UCAAAACACCAUUGUCACACUC.....   | 21   |
| .....UCAAAACACCAUUGUCACACUCC.....  | 38   |
| .....UCAAAACACCAUUGUCACACUCCA..... | 225  |
| .....UCAAAACACCAUUGUCACACUCCA..... | 189  |
| .....UCAAAACACCAUUGUCACACUCCA..... | 510  |
| .....UCAAAACACCAUUGUCACACUCCA..... | 382  |
| .....UCAAAACACCAUUGUCACACUCCA..... | 63   |
| .....CAAACACCAUUGUCAC.....         | 19   |
| .....CAAACACCAUUGUCACA.....        | 12   |
| .....CAAACACCAUUGUCACAC.....       | 20   |
| .....CAAACACCAUUGUCACACU.....      | 22   |
| .....CAAACACCAUUGUCACACUC.....     | 18   |
| .....CAAACACCAUUGUCACACUCC.....    | 12   |
| .....CAAACACCAUUGUCACACUCCA.....   | 88   |
| .....CAAACACCAUUGUCACACUCCA.....   | 79   |
| .....CAAACACCAUUGUCACACUCCA.....   | 199  |
| .....CAAACACCAUUGUCACACUCCA.....   | 208  |
| .....CAAACACCAUUGUCACACUCCA.....   | 29   |
| .....CAAACACCAUUGUCACACUCCA.....   | 7    |
| .....AAACACCAUUGUCACA.....         | 20   |
| .....AAACACCAUUGUCACAC.....        | 32   |
| .....AAACACCAUUGUCACACU.....       | 50   |
| .....AAACACCAUUGUCACACUC.....      | 40   |
| .....AAACACCAUUGUCACACUCC.....     | 29   |
| .....AAACACCAUUGUCACACUCCA.....    | 121  |
| .....AAACACCAUUGUCACACUCCA.....    | 281  |
| .....AAACACCAUUGUCACACUCCA.....    | 1420 |
| .....AAACACCAUUGUCACACUCCA.....    | 1453 |
| .....AAACACCAUUGUCACACUCCA.....    | 188  |
| .....AAACACCAUUGUCACACUCCA.....    | 30   |
| .....AACACCAUUGUCACAC.....         | 202  |
| .....AACACCAUUGUCACACU.....        | 421  |
| .....AACACCAUUGUCACACUC.....       | 280  |
| .....AACACCAUUGUCACACUCC.....      | 445  |

|                                |       |
|--------------------------------|-------|
| .....AACACCAUUGUCACACUCCA..... | 2817  |
| .....AACACCAUUGUCACACUCCA..... | 9010  |
| .....AACACCAUUGUCACACUCCA..... | 48049 |
| .....AACACCAUUGUCACACUCCA..... | 40079 |
| .....AACACCAUUGUCACACUCCA..... | 3535  |
| .....AACACCAUUGUCACACUCCA..... | 393   |
| .....ACACCAUUGUCACAC.....      | 2     |
| .....ACACCAUUGUCACAC.....      | 542   |
| .....ACACCAUUGUCACAC.....      | 579   |
| .....ACACCAUUGUCACAC.....      | 1199  |
| .....ACACCAUUGUCACAC.....      | 3762  |
| .....ACACCAUUGUCACAC.....      | 2802  |
| .....ACACCAUUGUCACAC.....      | 65248 |
| .....ACACCAUUGUCACAC.....      | 74968 |
| .....ACACCAUUGUCACAC.....      | 8923  |
| .....ACACCAUUGUCACAC.....      | 1717  |
| .....CACCAUUGUCACAC.....       | 228   |
| .....CACCAUUGUCACAC.....       | 395   |
| .....CACCAUUGUCACAC.....       | 1100  |
| .....CACCAUUGUCACAC.....       | 1124  |
| .....CACCAUUGUCACAC.....       | 19892 |
| .....CACCAUUGUCACAC.....       | 22681 |
| .....CACCAUUGUCACAC.....       | 6155  |
| .....CACCAUUGUCACAC.....       | 1453  |
| .....ACCAUUGUCACAC.....        | 45    |
| .....ACCAUUGUCACAC.....        | 148   |
| .....ACCAUUGUCACAC.....        | 417   |
| .....ACCAUUGUCACAC.....        | 2088  |
| .....ACCAUUGUCACAC.....        | 2305  |
| .....ACCAUUGUCACAC.....        | 362   |
| .....ACCAUUGUCACAC.....        | 61    |
| .....CCAUUGUCACAC.....         | 74    |
| .....CCAUUGUCACAC.....         | 80    |
| .....CCAUUGUCACAC.....         | 363   |
| .....CCAUUGUCACAC.....         | 350   |
| .....CCAUUGUCACAC.....         | 71    |
| .....CCAUUGUCACAC.....         | 12    |
| .....CAUUGUCACAC.....          | 149   |
| .....CAUUGUCACAC.....          | 1017  |
| .....CAUUGUCACAC.....          | 968   |
| .....CAUUGUCACAC.....          | 149   |
| .....CAUUGUCACAC.....          | 39    |
| .....AUUGUCACAC.....           | 1980  |
| .....AUUGUCACAC.....           | 2146  |
| .....AUUGUCACAC.....           | 325   |
| .....AUUGUCACAC.....           | 57    |
| .....UUGUCACAC.....            | 539   |

|                         |    |
|-------------------------|----|
| .....UUGUCACACUCCAUUUU. | 75 |
| .....UUGUCACACUCCAUUUUU | 17 |
| .....UGUCACACUCCAUUUU.  | 60 |
| .....UGUCACACUCCAUUUUU  | 14 |
| .....GUCACACUCCAUUUUU   | 12 |

**#shR-CCR5Chen5**

|                                                                    | Reads |
|--------------------------------------------------------------------|-------|
| UUUGGUGUAAACUGAGCUUGCUCUGUGAAGCCACAGAUGGGGAGCAAGCUCAGUUUACACCUUUUU |       |
| UUUGGUGUAAACUGAGCUUGCUC.....                                       | 3     |
| .UUGGUGUAAACUGAGCUUGC.....                                         | 7     |
| .UUGGUGUAAACUGAGCUUGC.....                                         | 12    |
| .UUGGUGUAAACUGAGCUUGC.....                                         | 4     |
| ..UGGUGUAAACUGAGCU.....                                            | 2     |
| ..UGGUGUAAACUGAGCU.....                                            | 5     |
| ..UGGUGUAAACUGAGCU.....                                            | 5     |
| ..UGGUGUAAACUGAGCU.....                                            | 23    |
| ..UGGUGUAAACUGAGCU.....                                            | 110   |
| ..UGGUGUAAACUGAGCU.....                                            | 345   |
| ..UGGUGUAAACUGAGCU.....                                            | 16    |
| ...GGUGUAAACUGAGCU.....                                            | 2     |
| ...GGUGUAAACUGAGCU.....                                            | 193   |
| ...GGUGUAAACUGAGCU.....                                            | 305   |
| ...GGUGUAAACUGAGCU.....                                            | 448   |
| ...GGUGUAAACUGAGCU.....                                            | 593   |
| ...GGUGUAAACUGAGCU.....                                            | 8964  |
| ...GGUGUAAACUGAGCU.....                                            | 41466 |
| ...GGUGUAAACUGAGCU.....                                            | 2573  |
| ...GGUGUAAACUGAGCU.....                                            | 1677  |
| ...GGUGUAAACUGAGCU.....                                            | 191   |
| ...GGUGUAAACUGAGCU.....                                            | 68    |
| ...GGUGUAAACUGAGCU.....                                            | 20    |
| ...GGUGUAAACUGAGCU.....                                            | 16    |
| ....GUGUAAACUGAGCU.....                                            | 2     |
| ....GUGUAAACUGAGCU.....                                            | 12    |
| ....GUGUAAACUGAGCU.....                                            | 54    |
| ....GUGUAAACUGAGCU.....                                            | 45    |
| ....GUGUAAACUGAGCU.....                                            | 8     |
| ....GUGUAAACUGAGCU.....                                            | 5     |
| ....GUGUAAACUGAGCU.....                                            | 3     |
| ....UGUAAACUGAGCU.....                                             | 4     |
| ....UGUAAACUGAGCU.....                                             | 4     |
| ....UGUAAACUGAGCU.....                                             | 43    |
| ....UGUAAACUGAGCU.....                                             | 28    |
| ....UGUAAACUGAGCU.....                                             | 11    |
| ....UGUAAACUGAGCU.....                                             | 10    |
| ....UGUAAACUGAGCU.....                                             | 9     |
| ....UGUAAACUGAGCU.....                                             | 5     |

|                                      |    |
|--------------------------------------|----|
| .....UGUAAACUGAGCUUGCUCUGUGAA.....   | 3  |
| .....UGUAAACUGAGCUUGCUCUGUGAAG.....  | 5  |
| .....UGUAAACUGAGCUUGCUCUGUGAAGC..... | 2  |
| .....GUAAACUGAGCUUGCUC.....          | 6  |
| .....GUAAACUGAGCUUGCUC.....          | 57 |
| .....GUAAACUGAGCUUGCUC.....          | 78 |
| .....GUAAACUGAGCUUGCUC.....          | 15 |
| .....GUAAACUGAGCUUGCUCUG.....        | 41 |
| .....GUAAACUGAGCUUGCUCUGU.....       | 6  |
| .....GUAAACUGAGCUUGCUCUGUG.....      | 6  |
| .....GUAAACUGAGCUUGCUCUGUGA.....     | 2  |
| .....GUAAACUGAGCUUGCUCUGUGAA.....    | 7  |
| .....GUAAACUGAGCUUGCUCUGUGAAGC.....  | 3  |
| .....UAAACUGAGCUUGCUC.....           | 19 |
| .....UAAACUGAGCUUGCUC.....           | 36 |
| .....UAAACUGAGCUUGCUC.....           | 3  |
| .....UAAACUGAGCUUGCUCUG.....         | 9  |
| .....UAAACUGAGCUUGCUCUGUG.....       | 3  |
| .....UAAACUGAGCUUGCUCUGUGA.....      | 6  |
| .....UAAACUGAGCUUGCUCUGUGAAG.....    | 6  |
| .....AAACUGAGCUUGCUC.....            | 26 |
| .....AAACUGAGCUUGCUC.....            | 2  |
| .....AAACUGAGCUUGCUCUG.....          | 16 |
| .....AAACUGAGCUUGCUCUGU.....         | 11 |
| .....AACUGAGCUUGCUC.....             | 4  |
| .....AACUGAGCUUGCUCUG.....           | 9  |
| .....AACUGAGCUUGCUCUGU.....          | 3  |
| .....AACUGAGCUUGCUCUGUGAAG.....      | 2  |
| .....ACUGAGCUUGCUCUG.....            | 9  |
| .....ACUGAGCUUGCUCUGUG.....          | 7  |
| .....ACUGAGCUUGCUCUGUGA.....         | 4  |
| .....ACUGAGCUUGCUCUGUGAA.....        | 2  |
| .....ACUGAGCUUGCUCUGUGAAG.....       | 4  |
| .....CUGAGCUUGCUCUGU.....            | 3  |
| .....CUGAGCUUGCUCUGUG.....           | 22 |
| .....CUGAGCUUGCUCUGUGA.....          | 6  |
| .....CUGAGCUUGCUCUGUGAA.....         | 5  |
| .....CUGAGCUUGCUCUGUGAAG.....        | 21 |
| .....CUGAGCUUGCUCUGUGAAGCC.....      | 4  |
| .....CUGAGCUUGCUCUGUGAAGCCA.....     | 2  |
| .....UGAGCUUGCUCUGUG.....            | 21 |
| .....UGAGCUUGCUCUGUGA.....           | 4  |
| .....UGAGCUUGCUCUGUGAA.....          | 7  |
| .....UGAGCUUGCUCUGUGAAG.....         | 8  |
| .....UGAGCUUGCUCUGUGAAGCC.....       | 2  |
| .....UGAGCUUGCUCUGUGAAGCCAC.....     | 3  |
| .....UGAGCUUGCUCUGUGAAGCCACA.....    | 2  |



|                                       |    |
|---------------------------------------|----|
| .....GAGCUUGCUCUGUGAA.....            | 2  |
| .....GAGCUUGCUCUGUGAAG.....           | 4  |
| .....GAGCUUGCUCUGUGAAGCC.....         | 2  |
| .....AGCUUGCUCUGUGAAG.....            | 11 |
| .....AGCUUGCUCUGUGAAGC.....           | 6  |
| .....AGCUUGCUCUGUGAAGCC.....          | 21 |
| .....AGCUUGCUCUGUGAAGCCA.....         | 2  |
| .....AGCUUGCUCUGUGAAGCCAC.....        | 2  |
| .....AGCUUGCUCUGUGAAGCCACA.....       | 2  |
| .....GCUUGCUCUGUGAAGC.....            | 2  |
| .....GCUUGCUCUGUGAAGCCAC.....         | 2  |
| .....CUUGCUCUGUGAAGCCACAGA.....       | 6  |
| .....UUGCUCUGUGAAGCC.....             | 2  |
| .....UUGCUCUGUGAAGCCA.....            | 2  |
| .....UUGCUCUGUGAAGCCACAGA.....        | 3  |
| .....UUGCUCUGUGAAGCCACAGAUGGG.....    | 2  |
| .....UUGCUCUGUGAAGCCACAGAUGGGGA.....  | 2  |
| .....UGCUCUGUGAAGCCAC.....            | 2  |
| .....UGCUCUGUGAAGCCACAGAUGGGGA.....   | 2  |
| .....GCUCUGUGAAGCCACAGAUG.....        | 2  |
| .....GCUCUGUGAAGCCACAGAUGGG.....      | 2  |
| .....CUCCUGUGAAGCCACAG.....           | 3  |
| .....CUCCUGUGAAGCCACAGA.....          | 4  |
| .....CUCCUGUGAAGCCACAGAU.....         | 2  |
| .....CUCCUGUGAAGCCACAGAUGG.....       | 2  |
| .....CUCCUGUGAAGCCACAGAUGGG.....      | 9  |
| .....CUCCUGUGAAGCCACAGAUGGGGA.....    | 2  |
| .....CUCCUGUGAAGCCACAGAUGGGGAGC.....  | 2  |
| .....UCCUGUGAAGCCACAGA.....           | 2  |
| .....UCCUGUGAAGCCACAGAU.....          | 2  |
| .....UCCUGUGAAGCCACAGAUGGGGAG.....    | 4  |
| .....UCCUGUGAAGCCACAGAUGGGGAGC.....   | 5  |
| .....CCUGUGAAGCCACAGA.....            | 3  |
| .....CCUGUGAAGCCACAGAU.....           | 2  |
| .....CCUGUGAAGCCACAGAUG.....          | 2  |
| .....CCUGUGAAGCCACAGAUGG.....         | 3  |
| .....CCUGUGAAGCCACAGAUGGGG.....       | 2  |
| .....CCUGUGAAGCCACAGAUGGGGA.....      | 3  |
| .....CCUGUGAAGCCACAGAUGGGGAG.....     | 11 |
| .....CCUGUGAAGCCACAGAUGGGGAGC.....    | 2  |
| .....CCUGUGAAGCCACAGAUGGGGAGCA.....   | 3  |
| .....CCUGUGAAGCCACAGAUGGGGAGCAA.....  | 2  |
| .....CCUGUGAAGCCACAGAUGGGGAGCAAG..... | 2  |
| .....CUGUGAAGCCACAGAUG.....           | 3  |
| .....CUGUGAAGCCACAGAUGGG.....         | 2  |
| .....CUGUGAAGCCACAGAUGGGGA.....       | 33 |
| .....CUGUGAAGCCACAGAUGGGGAG.....      | 2  |

|                                       |     |
|---------------------------------------|-----|
| .....UGUGAAGCCACAGAUGG.....           | 2   |
| .....UGUGAAGCCACAGAUGGG.....          | 9   |
| .....UGUGAAGCCACAGAUGGGG.....         | 881 |
| .....UGUGAAGCCACAGAUGGGGA.....        | 2   |
| .....UGUGAAGCCACAGAUGGGGAG.....       | 4   |
| .....UGUGAAGCCACAGAUGGGGAGC.....      | 38  |
| .....UGUGAAGCCACAGAUGGGGAGCA.....     | 3   |
| .....UGUGAAGCCACAGAUGGGGAGCAAG.....   | 2   |
| .....GUGAAGCCACAGAUGG.....            | 4   |
| .....GUGAAGCCACAGAUGGG.....           | 12  |
| .....GUGAAGCCACAGAUGGGG.....          | 27  |
| .....GUGAAGCCACAGAUGGGGAGCA.....      | 3   |
| .....UGAAGCCACAGAUGGG.....            | 3   |
| .....UGAAGCCACAGAUGGGG.....           | 7   |
| .....UGAAGCCACAGAUGGGGA.....          | 2   |
| .....UGAAGCCACAGAUGGGGAG.....         | 2   |
| .....UGAAGCCACAGAUGGGGAGC.....        | 5   |
| .....UGAAGCCACAGAUGGGGAGCAAG.....     | 3   |
| .....GAAGCCACAGAUGGGG.....            | 8   |
| .....GAAGCCACAGAUGGGGA.....           | 4   |
| .....GAAGCCACAGAUGGGGAGC.....         | 2   |
| .....AAGCCACAGAUGGGGA.....            | 3   |
| .....AAGCCACAGAUGGGGAGCAAG.....       | 2   |
| .....AGCCACAGAUGGGGAGCAA.....         | 2   |
| .....CCACAGAUGGGGAGCAAGC.....         | 3   |
| .....CCACAGAUGGGGAGCAAGCUCAGUUU.....  | 7   |
| .....CACAGAUGGGGAGCAAG.....           | 3   |
| .....CACAGAUGGGGAGCAAGCUCAG.....      | 3   |
| .....CACAGAUGGGGAGCAAGCUCAGUU.....    | 2   |
| .....CACAGAUGGGGAGCAAGCUCAGUUU.....   | 5   |
| .....CACAGAUGGGGAGCAAGCUCAGUUUA.....  | 6   |
| .....CACAGAUGGGGAGCAAGCUCAGUUUAC..... | 6   |
| .....ACAGAUGGGGAGCAAGCUCAG.....       | 3   |
| .....ACAGAUGGGGAGCAAGCUCAGUUU.....    | 2   |
| .....ACAGAUGGGGAGCAAGCUCAGUUUA.....   | 2   |
| .....ACAGAUGGGGAGCAAGCUCAGUUUACA..... | 5   |
| .....CAGAUGGGGAGCAAGC.....            | 2   |
| .....CAGAUGGGGAGCAAGCUCAGU.....       | 2   |
| .....CAGAUGGGGAGCAAGCUCAGUU.....      | 3   |
| .....CAGAUGGGGAGCAAGCUCAGUUU.....     | 3   |
| .....CAGAUGGGGAGCAAGCUCAGUUUA.....    | 8   |
| .....CAGAUGGGGAGCAAGCUCAGUUUAC.....   | 2   |
| .....CAGAUGGGGAGCAAGCUCAGUUUACA.....  | 12  |
| .....CAGAUGGGGAGCAAGCUCAGUUUACAC..... | 3   |
| .....AGAUGGGGAGCAAGCUCAG.....         | 2   |
| .....AGAUGGGGAGCAAGCUCAGUU.....       | 2   |
| .....AGAUGGGGAGCAAGCUCAGUUUA.....     | 2   |

|                                       |     |
|---------------------------------------|-----|
| .....AGAUGGGGAGCAAGCUCAGUUUACA.....   | 9   |
| .....AGAUGGGGAGCAAGCUCAGUUUACAC.....  | 6   |
| .....AGAUGGGGAGCAAGCUCAGUUUACACC..... | 7   |
| .....GAUGGGGAGCAAGCUCAG.....          | 5   |
| .....GAUGGGGAGCAAGCUCAGUU.....        | 2   |
| .....GAUGGGGAGCAAGCUCAGUUU.....       | 2   |
| .....GAUGGGGAGCAAGCUCAGUUUA.....      | 2   |
| .....GAUGGGGAGCAAGCUCAGUUUAC.....     | 3   |
| .....GAUGGGGAGCAAGCUCAGUUUACA.....    | 13  |
| .....GAUGGGGAGCAAGCUCAGUUUACAC.....   | 2   |
| .....GAUGGGGAGCAAGCUCAGUUUACACC.....  | 7   |
| .....GAUGGGGAGCAAGCUCAGUUUACACCU..... | 13  |
| .....AUGGGGAGCAAGCUCA.....            | 5   |
| .....AUGGGGAGCAAGCUCAG.....           | 23  |
| .....AUGGGGAGCAAGCUCAGU.....          | 3   |
| .....AUGGGGAGCAAGCUCAGUU.....         | 4   |
| .....AUGGGGAGCAAGCUCAGUUU.....        | 2   |
| .....AUGGGGAGCAAGCUCAGUUUA.....       | 3   |
| .....AUGGGGAGCAAGCUCAGUUUAC.....      | 2   |
| .....AUGGGGAGCAAGCUCAGUUUACA.....     | 23  |
| .....AUGGGGAGCAAGCUCAGUUUACAC.....    | 7   |
| .....AUGGGGAGCAAGCUCAGUUUACACC.....   | 16  |
| .....AUGGGGAGCAAGCUCAGUUUACACCU.....  | 36  |
| .....AUGGGGAGCAAGCUCAGUUUACACCUU..... | 182 |
| .....UGGGGAGCAAGCUCAG.....            | 57  |
| .....UGGGGAGCAAGCUCAGU.....           | 4   |
| .....UGGGGAGCAAGCUCAGUU.....          | 3   |
| .....UGGGGAGCAAGCUCAGUUU.....         | 2   |
| .....UGGGGAGCAAGCUCAGUUUA.....        | 3   |
| .....UGGGGAGCAAGCUCAGUUUAC.....       | 4   |
| .....UGGGGAGCAAGCUCAGUUUACA.....      | 19  |
| .....UGGGGAGCAAGCUCAGUUUACAC.....     | 8   |
| .....UGGGGAGCAAGCUCAGUUUACACC.....    | 12  |
| .....UGGGGAGCAAGCUCAGUUUACACCU.....   | 63  |
| .....UGGGGAGCAAGCUCAGUUUACACCUU.....  | 145 |
| .....UGGGGAGCAAGCUCAGUUUACACCUUU..... | 211 |
| .....GGGGAGCAAGCUCAGU.....            | 2   |
| .....GGGGAGCAAGCUCAGUU.....           | 3   |
| .....GGGGAGCAAGCUCAGUUU.....          | 2   |
| .....GGGGAGCAAGCUCAGUUUA.....         | 7   |
| .....GGGGAGCAAGCUCAGUUUAC.....        | 4   |
| .....GGGGAGCAAGCUCAGUUUACA.....       | 9   |
| .....GGGGAGCAAGCUCAGUUUACAC.....      | 9   |
| .....GGGGAGCAAGCUCAGUUUACACC.....     | 16  |
| .....GGGGAGCAAGCUCAGUUUACACCU.....    | 186 |
| .....GGGGAGCAAGCUCAGUUUACACCUU.....   | 208 |
| .....GGGGAGCAAGCUCAGUUUACACCUUU.....  | 133 |

|                                   |        |
|-----------------------------------|--------|
| .....GGGAGCAAGCUCAGUUUACACCUUUU.  | 26     |
| .....GGGAGCAAGCUCAGUU.            | 3      |
| .....GGGAGCAAGCUCAGUUU.           | 4      |
| .....GGGAGCAAGCUCAGUUUA.          | 4      |
| .....GGGAGCAAGCUCAGUUUAC.         | 4      |
| .....GGGAGCAAGCUCAGUUUACA.        | 5      |
| .....GGGAGCAAGCUCAGUUUACAC.       | 12     |
| .....GGGAGCAAGCUCAGUUUACACC.      | 36     |
| .....GGGAGCAAGCUCAGUUUACACCU.     | 831    |
| .....GGGAGCAAGCUCAGUUUACACCUU.    | 361    |
| .....GGGAGCAAGCUCAGUUUACACCUUU.   | 285    |
| .....GGGAGCAAGCUCAGUUUACACCUUUU.  | 26     |
| .....GGGAGCAAGCUCAGUUUACACCUUUUU. | 4      |
| .....GGAGCAAGCUCAGUUUA.           | 2      |
| .....GGAGCAAGCUCAGUUUACA.         | 4      |
| .....GGAGCAAGCUCAGUUUACAC.        | 3      |
| .....GGAGCAAGCUCAGUUUACACC.       | 10     |
| .....GGAGCAAGCUCAGUUUACACCU.      | 71     |
| .....GGAGCAAGCUCAGUUUACACCUU.     | 46     |
| .....GGAGCAAGCUCAGUUUACACCUUU.    | 46     |
| .....GGAGCAAGCUCAGUUUACACCUUUU.   | 10     |
| .....GGAGCAAGCUCAGUUUACACCUUUUU.  | 2      |
| .....GAGCAAGCUCAGUUUA.            | 2      |
| .....GAGCAAGCUCAGUUUAC.           | 14     |
| .....GAGCAAGCUCAGUUUACA.          | 28     |
| .....GAGCAAGCUCAGUUUACAC.         | 53     |
| .....GAGCAAGCUCAGUUUACACC.        | 181    |
| .....GAGCAAGCUCAGUUUACACCU.       | 946    |
| .....GAGCAAGCUCAGUUUACACCUU.      | 3751   |
| .....GAGCAAGCUCAGUUUACACCUUU.     | 3039   |
| .....GAGCAAGCUCAGUUUACACCUUUU.    | 404    |
| .....GAGCAAGCUCAGUUUACACCUUUUU.   | 53     |
| .....AGCAAGCUCAGUUUA.             | 3      |
| .....AGCAAGCUCAGUUUAC.            | 132    |
| .....AGCAAGCUCAGUUUACA.           | 183    |
| .....AGCAAGCUCAGUUUACAC.          | 656    |
| .....AGCAAGCUCAGUUUACACC.         | 1378   |
| .....AGCAAGCUCAGUUUACACCU.        | 8284   |
| .....AGCAAGCUCAGUUUACACCUU.       | 73744  |
| .....AGCAAGCUCAGUUUACACCUUU.      | 122191 |
| .....AGCAAGCUCAGUUUACACCUUUU.     | 14617  |
| .....AGCAAGCUCAGUUUACACCUUUUU.    | 2907   |
| .....GCAAGCUCAGUUUACA.            | 12     |
| .....GCAAGCUCAGUUUACAC.           | 25     |
| .....GCAAGCUCAGUUUACACC.          | 43     |
| .....GCAAGCUCAGUUUACACCU.         | 260    |
| .....GCAAGCUCAGUUUACACCUU.        | 1592   |

|                              |      |
|------------------------------|------|
| .....GCAAGCUCAGUUUACACCUUU.. | 2730 |
| .....GCAAGCUCAGUUUACACCUUUU. | 483  |
| .....GCAAGCUCAGUUUACACCUUUUU | 78   |
| .....CAAGCUCAGUUUACAC.....   | 4    |
| .....CAAGCUCAGUUUACACC.....  | 12   |
| .....CAAGCUCAGUUUACACCU....  | 64   |
| .....CAAGCUCAGUUUACACCUU...  | 464  |
| .....CAAGCUCAGUUUACACCUUU..  | 797  |
| .....CAAGCUCAGUUUACACCUUUU.  | 112  |
| .....CAAGCUCAGUUUACACCUUUUU  | 30   |
| .....AAGCUCAGUUUACACC.....   | 15   |
| .....AAGCUCAGUUUACACCU....   | 174  |
| .....AAGCUCAGUUUACACCUU...   | 797  |
| .....AAGCUCAGUUUACACCUUU..   | 1349 |
| .....AAGCUCAGUUUACACCUUUU.   | 139  |
| .....AAGCUCAGUUUACACCUUUUU   | 35   |
| .....AGCUCAGUUUACACCU....    | 125  |
| .....AGCUCAGUUUACACCUU...    | 169  |
| .....AGCUCAGUUUACACCUUU..    | 209  |
| .....AGCUCAGUUUACACCUUUU.    | 18   |
| .....AGCUCAGUUUACACCUUUUU    | 3    |
| .....GCUCAGUUUACACCUU...     | 124  |
| .....GCUCAGUUUACACCUUU..     | 220  |
| .....GCUCAGUUUACACCUUUU.     | 18   |
| .....GCUCAGUUUACACCUUUUU     | 5    |
| .....CUCAGUUUACACCUUU...     | 437  |
| .....CUCAGUUUACACCUUUU.      | 58   |
| .....CUCAGUUUACACCUUUUU      | 9    |
| .....UCAGUUUACACCUUUU.       | 193  |
| .....UCAGUUUACACCUUUUU       | 35   |
| .....CAGUUUACACCUUUUU        | 14   |

**#sh1005-T**

|                                                         |       |
|---------------------------------------------------------|-------|
| UGAGCAAGCUCAGUUUACACCUUGUCCGACGGUGUAAACUGAGCUUGCUCUUUUU | Reads |
| UGAGCAAGCUCAGUUUACAC.....                               | 4     |
| UGAGCAAGCUCAGUUUACACC.....                              | 39    |
| UGAGCAAGCUCAGUUUACACCU....                              | 9     |
| .GAGCAAGCUCAGUUUAC.....                                 | 10    |
| .GAGCAAGCUCAGUUUACA.....                                | 28    |
| .GAGCAAGCUCAGUUUACAC.....                               | 120   |
| .GAGCAAGCUCAGUUUACACC.....                              | 1010  |
| .GAGCAAGCUCAGUUUACACCU....                              | 174   |
| .GAGCAAGCUCAGUUUACACCUU...                              | 20    |
| .GAGCAAGCUCAGUUUACACCUUG..                              | 26    |
| .GAGCAAGCUCAGUUUACACCUUGU.                              | 6     |
| .GAGCAAGCUCAGUUUACACCUUGUC.                             | 7     |
| .GAGCAAGCUCAGUUUACACCUUGUCC.                            | 6     |

|                                         |     |
|-----------------------------------------|-----|
| ..AGCAAGCUCAGUUUACAC.....               | 5   |
| ..AGCAAGCUCAGUUUACACC.....              | 17  |
| ..AGCAAGCUCAGUUUACACCU.....             | 3   |
| ..AGCAAGCUCAGUUUACACCUUG.....           | 3   |
| ..AGCAAGCUCAGUUUACACCUUGUC.....         | 2   |
| ...GCAAGCUCAGUUUACA.....                | 6   |
| ...GCAAGCUCAGUUUACAC.....               | 13  |
| ...GCAAGCUCAGUUUACACC.....              | 142 |
| ...GCAAGCUCAGUUUACACCU.....             | 26  |
| ...GCAAGCUCAGUUUACACCUU.....            | 3   |
| ...GCAAGCUCAGUUUACACCUUG.....           | 8   |
| ...GCAAGCUCAGUUUACACCUUGU.....          | 7   |
| ...GCAAGCUCAGUUUACACCUUGUCC.....        | 2   |
| ....CAAGCUCAGUUUACACC.....              | 6   |
| ....CAAGCUCAGUUUACACCUUGU.....          | 4   |
| .....AAGCUCAGUUUACACC.....              | 12  |
| .....AAGCUCAGUUUACACCU.....             | 6   |
| .....AAGCUCAGUUUACACCUUGU.....          | 2   |
| .....AGCUCAGUUUACACCUUGU.....           | 8   |
| .....CAGUUUACACCUUGUCCG.....            | 2   |
| .....UUACACCUUGUCCGACGGUGU.....         | 3   |
| .....CCUUGUCCGACGGUGUAAACUGAG.....      | 5   |
| .....CCUUGUCCGACGGUGUAAACUGAGC.....     | 2   |
| .....CUUGUCCGACGGUGUAAACUG.....         | 2   |
| .....UUGUCCGACGGUGUAAA.....             | 2   |
| .....UUGUCCGACGGUGUAAACUGA.....         | 2   |
| .....UGUCCGACGGUGUAAACUGAGC.....        | 2   |
| .....UGUCCGACGGUGUAAACUGAGCUU.....      | 3   |
| .....UGUCCGACGGUGUAAACUGAGCUUGCUC.....  | 4   |
| .....GUCCGACGGUGUAAACUGAGCUUGCUC.....   | 3   |
| .....UCCGACGGUGUAAACUGAGCU.....         | 2   |
| .....UCCGACGGUGUAAACUGAGCUUGCUC.....    | 2   |
| .....UCCGACGGUGUAAACUGAGCUUGCUCU.....   | 8   |
| .....UCCGACGGUGUAAACUGAGCUUGCUCUU.....  | 8   |
| .....CCGACGGUGUAAACUG.....              | 3   |
| .....CCGACGGUGUAAACUGA.....             | 14  |
| .....CCGACGGUGUAAACUGAG.....            | 32  |
| .....CCGACGGUGUAAACUGAGC.....           | 3   |
| .....CCGACGGUGUAAACUGAGCUUGC.....       | 2   |
| .....CCGACGGUGUAAACUGAGCUUGCUC.....     | 4   |
| .....CCGACGGUGUAAACUGAGCUUGCUCU.....    | 3   |
| .....CCGACGGUGUAAACUGAGCUUGCUCUU.....   | 16  |
| .....CCGACGGUGUAAACUGAGCUUGCUCUUU.....  | 31  |
| .....CCGACGGUGUAAACUGAGCUUGCUCUUUU..... | 8   |
| .....CGACGGUGUAAACUGA.....              | 9   |
| .....CGACGGUGUAAACUGAG.....             | 13  |
| .....CGACGGUGUAAACUGAGCUUG.....         | 4   |

|                                        |      |
|----------------------------------------|------|
| .....CGACGGUGUAAACUGAGCUUGC.....       | 4    |
| .....CGACGGUGUAAACUGAGCUUGCUC.....     | 7    |
| .....CGACGGUGUAAACUGAGCUUGCUCU.....    | 9    |
| .....CGACGGUGUAAACUGAGCUUGCUCUU.....   | 15   |
| .....CGACGGUGUAAACUGAGCUUGCUCUUU.....  | 8    |
| .....CGACGGUGUAAACUGAGCUUGCUCUUUU..... | 3    |
| .....GACGGUGUAAACUGAG.....             | 2    |
| .....GACGGUGUAAACUGAGCU.....           | 2    |
| .....GACGGUGUAAACUGAGCUUG.....         | 2    |
| .....GACGGUGUAAACUGAGCUUGC.....        | 10   |
| .....GACGGUGUAAACUGAGCUUGCUC.....      | 2    |
| .....GACGGUGUAAACUGAGCUUGCUCU.....     | 5    |
| .....GACGGUGUAAACUGAGCUUGCUCUU.....    | 21   |
| .....GACGGUGUAAACUGAGCUUGCUCUUU.....   | 30   |
| .....GACGGUGUAAACUGAGCUUGCUCUUUU.....  | 16   |
| .....GACGGUGUAAACUGAGCUUGCUCUUUUU..... | 2    |
| .....ACGGUGUAAACUGAGCUU.....           | 2    |
| .....ACGGUGUAAACUGAGCUUG.....          | 4    |
| .....ACGGUGUAAACUGAGCUUGC.....         | 4    |
| .....ACGGUGUAAACUGAGCUUGCUC.....       | 7    |
| .....ACGGUGUAAACUGAGCUUGCUCU.....      | 25   |
| .....ACGGUGUAAACUGAGCUUGCUCUU.....     | 74   |
| .....ACGGUGUAAACUGAGCUUGCUCUUU.....    | 123  |
| .....ACGGUGUAAACUGAGCUUGCUCUUUU.....   | 23   |
| .....ACGGUGUAAACUGAGCUUGCUCUUUUU.....  | 2    |
| .....CGGUGUAAACUGAGCUUGC.....          | 5    |
| .....CGGUGUAAACUGAGCUUGCUC.....        | 8    |
| .....CGGUGUAAACUGAGCUUGCUCU.....       | 40   |
| .....CGGUGUAAACUGAGCUUGCUCUU.....      | 30   |
| .....CGGUGUAAACUGAGCUUGCUCUUU.....     | 7    |
| .....GGUGUAAACUGAGCUUGC.....           | 2    |
| .....GGUGUAAACUGAGCUUGCUC.....         | 2    |
| .....GGUGUAAACUGAGCUUGCUCU.....        | 12   |
| .....GGUGUAAACUGAGCUUGCUCUU.....       | 11   |
| .....GGUGUAAACUGAGCUUGCUCUUU.....      | 3    |
| .....GUGUAAACUGAGCUUGCUC.....          | 2    |
| .....GUGUAAACUGAGCUUGCUCU.....         | 8    |
| .....GUGUAAACUGAGCUUGCUCUU.....        | 14   |
| .....GUGUAAACUGAGCUUGCUCUUU.....       | 20   |
| .....GUGUAAACUGAGCUUGCUCUUUU.....      | 9    |
| .....UGUAAACUGAGCUUGC.....             | 17   |
| .....UGUAAACUGAGCUUGCUC.....           | 54   |
| .....UGUAAACUGAGCUUGCUCU.....          | 122  |
| .....UGUAAACUGAGCUUGCUCUU.....         | 129  |
| .....UGUAAACUGAGCUUGCUCUUU.....        | 1177 |
| .....UGUAAACUGAGCUUGCUCUUUU.....       | 3325 |
| .....UGUAAACUGAGCUUGCUCUUUUU.....      | 443  |

|                                |    |
|--------------------------------|----|
| .....UGUAAACUGAGCUUGCUCUUUUU   | 31 |
| .....GUA AACUGAGCUUGCUC.....   | 9  |
| .....GUA AACUGAGCUUGCUCU.....  | 16 |
| .....GUA AACUGAGCUUGCUCUU..... | 47 |
| .....GUA AACUGAGCUUGCUCUUU..   | 98 |
| .....GUA AACUGAGCUUGCUCUUUU.   | 7  |
| .....GUA AACUGAGCUUGCUCUUUUU   | 2  |
| .....UAAACUGAGCUUGCUCU.....    | 3  |
| .....UAAACUGAGCUUGCUCUU.....   | 8  |
| .....UAAACUGAGCUUGCUCUUU..     | 13 |
| .....UAAACUGAGCUUGCUCUUUU.     | 3  |
| .....AAACUGAGCUUGCUCU.....     | 4  |
| .....AAACUGAGCUUGCUCUU.....    | 9  |
| .....AAACUGAGCUUGCUCUUU..      | 11 |
| .....AAACUGAGCUUGCUCUUUU.      | 2  |
| .....AACUGAGCUUGCUCUU.....     | 8  |
| .....AACUGAGCUUGCUCUUU..       | 7  |
| .....AACUGAGCUUGCUCUUUU.       | 2  |
| .....ACUGAGCUUGCUCUUU..        | 8  |
| .....CUGAGCUUGCUCUUUU.         | 6  |

**#sh1005-G**

|                                                         | Reads |
|---------------------------------------------------------|-------|
| GGAGCAAGCUCAGUUUACACCUUGUCCGACGGUGUAAACUGAGCUUGCUCUUUUU |       |
| GGAGCAAGCUCAGUUU.....                                   | 13    |
| GGAGCAAGCUCAGUUUA.....                                  | 20    |
| GGAGCAAGCUCAGUUUAC.....                                 | 45    |
| GGAGCAAGCUCAGUUUACA.....                                | 108   |
| GGAGCAAGCUCAGUUUACAC.....                               | 335   |
| GGAGCAAGCUCAGUUUACACC.....                              | 1896  |
| GGAGCAAGCUCAGUUUACACCU.....                             | 316   |
| GGAGCAAGCUCAGUUUACACCUU.....                            | 37    |
| GGAGCAAGCUCAGUUUACACCUUG.....                           | 24    |
| GGAGCAAGCUCAGUUUACACCUUGU.....                          | 2     |
| GGAGCAAGCUCAGUUUACACCUUGUC.....                         | 2     |
| GGAGCAAGCUCAGUUUACACCUUGUCC.....                        | 2     |
| .GAGCAAGCUCAGUUUACA.....                                | 3     |
| .GAGCAAGCUCAGUUUACAC.....                               | 21    |
| .GAGCAAGCUCAGUUUACACC.....                              | 153   |
| .GAGCAAGCUCAGUUUACACCU.....                             | 18    |
| .GAGCAAGCUCAGUUUACACCUU.....                            | 8     |
| .GAGCAAGCUCAGUUUACACCUUG.....                           | 2     |
| .GAGCAAGCUCAGUUUACACCUUGU.....                          | 3     |
| .GAGCAAGCUCAGUUUACACCUUGUCC.....                        | 4     |
| .GAGCAAGCUCAGUUUACACCUUGUCCG.....                       | 2     |
| ..AGCAAGCUCAGUUUACA.....                                | 2     |
| ..AGCAAGCUCAGUUUACAC.....                               | 5     |
| ..AGCAAGCUCAGUUUACACC.....                              | 18    |



|                                        |    |
|----------------------------------------|----|
| ..AGCAAGCUCAGUUUACACCU.....            | 12 |
| ..AGCAAGCUCAGUUUACACCUUG.....          | 7  |
| ..AGCAAGCUCAGUUUACACCUUGU.....         | 2  |
| ..AGCAAGCUCAGUUUACACCUUGUC.....        | 2  |
| ..AGCAAGCUCAGUUUACACCUUGUCC.....       | 5  |
| ..AGCAAGCUCAGUUUACACCUUGUCCG.....      | 3  |
| ..AGCAAGCUCAGUUUACACCUUGUCCGA.....     | 7  |
| ...GCAAGCUCAGUUUACAC.....              | 3  |
| ...GCAAGCUCAGUUUACACC.....             | 41 |
| ...GCAAGCUCAGUUUACACCU.....            | 4  |
| ...GCAAGCUCAGUUUACACCUUG.....          | 3  |
| ....CAAGCUCAGUUUACACC.....             | 6  |
| ....CAAGCUCAGUUUACACCU.....            | 2  |
| ....CAAGCUCAGUUUACACCUU.....           | 2  |
| ....CAAGCUCAGUUUACACCUUG.....          | 3  |
| .....AAGCUCAGUUUACACC.....             | 23 |
| .....AAGCUCAGUUUACACCUU.....           | 2  |
| .....AAGCUCAGUUUACACCUUGU.....         | 3  |
| .....AGCUCAGUUUACACCUUGU.....          | 16 |
| .....GCUCAGUUUACACCUUGUCCGACG.....     | 3  |
| .....UCAGUUUACACCUUGUCCG.....          | 2  |
| .....UCAGUUUACACCUUGUCCGACGG.....      | 3  |
| .....UACACCUUGUCCGACGGUGU.....         | 9  |
| .....CACCUUGUCCGACGGUGUAAACUGAGC.....  | 2  |
| .....ACCUUGUCCGACGGUGUAAACUGAGCU.....  | 4  |
| .....CCUUGUCCGACGGUGUAAACUGAGCU.....   | 2  |
| .....UUGUCCGACGGUGUAAA.....            | 4  |
| .....UUGUCCGACGGUGUAAACUGAG.....       | 2  |
| .....UUGUCCGACGGUGUAAACUGAGCUU.....    | 2  |
| .....UGUCCGACGGUGUAAA.....             | 2  |
| .....UGUCCGACGGUGUAAACUG.....          | 3  |
| .....GUCCGACGGUGUAAACUGAGC.....        | 2  |
| .....GUCCGACGGUGUAAACUGAGCUUGCUC.....  | 4  |
| .....GUCCGACGGUGUAAACUGAGCUUGCUCU..... | 2  |
| .....UCCGACGGUGUAAACUGAGC.....         | 2  |
| .....UCCGACGGUGUAAACUGAGCUUGC.....     | 3  |
| .....UCCGACGGUGUAAACUGAGCUUGCUCU.....  | 3  |
| .....UCCGACGGUGUAAACUGAGCUUGCUCUU..... | 11 |
| .....CCGACGGUGUAAACUG.....             | 7  |
| .....CCGACGGUGUAAACUGA.....            | 4  |
| .....CCGACGGUGUAAACUGAG.....           | 26 |
| .....CCGACGGUGUAAACUGAGC.....          | 3  |
| .....CCGACGGUGUAAACUGAGCUUGCUC.....    | 9  |
| .....CCGACGGUGUAAACUGAGCUUGCUCU.....   | 4  |
| .....CCGACGGUGUAAACUGAGCUUGCUCUU.....  | 14 |
| .....CCGACGGUGUAAACUGAGCUUGCUCUUU..... | 7  |

|                                        |      |
|----------------------------------------|------|
| .....CGACGGUGUAAACUGA.....             | 8    |
| .....CGACGGUGUAAACUGAG.....            | 14   |
| .....CGACGGUGUAAACUGAGC.....           | 3    |
| .....CGACGGUGUAAACUGAGCUUGCUC.....     | 4    |
| .....CGACGGUGUAAACUGAGCUUGCUCU.....    | 4    |
| .....CGACGGUGUAAACUGAGCUUGCUCUU.....   | 5    |
| .....CGACGGUGUAAACUGAGCUUGCUCUUU.....  | 14   |
| .....CGACGGUGUAAACUGAGCUUGCUCUUUU..... | 25   |
| .....GACGGUGUAAACUGAG.....             | 3    |
| .....GACGGUGUAAACUGAGCUUGC.....        | 3    |
| .....GACGGUGUAAACUGAGCUUGCUC.....      | 10   |
| .....GACGGUGUAAACUGAGCUUGCUCU.....     | 12   |
| .....GACGGUGUAAACUGAGCUUGCUCUU.....    | 31   |
| .....GACGGUGUAAACUGAGCUUGCUCUUU.....   | 22   |
| .....GACGGUGUAAACUGAGCUUGCUCUUUU.....  | 33   |
| .....ACGGUGUAAACUGAGC.....             | 6    |
| .....ACGGUGUAAACUGAGCUUGC.....         | 9    |
| .....ACGGUGUAAACUGAGCUUGCUC.....       | 6    |
| .....ACGGUGUAAACUGAGCUUGCUC.....       | 28   |
| .....ACGGUGUAAACUGAGCUUGCUCU.....      | 28   |
| .....ACGGUGUAAACUGAGCUUGCUCUU.....     | 76   |
| .....ACGGUGUAAACUGAGCUUGCUCUUU.....    | 53   |
| .....ACGGUGUAAACUGAGCUUGCUCUUUU.....   | 24   |
| .....CGGUGUAAACUGAGCUUGCUC.....        | 3    |
| .....CGGUGUAAACUGAGCUUGCUC.....        | 10   |
| .....CGGUGUAAACUGAGCUUGCUCU.....       | 61   |
| .....CGGUGUAAACUGAGCUUGCUCUU.....      | 12   |
| .....CGGUGUAAACUGAGCUUGCUCUUU.....     | 9    |
| .....CGGUGUAAACUGAGCUUGCUCUUUU.....    | 10   |
| .....GGUGUAAACUGAGCUUGCUC.....         | 2    |
| .....GGUGUAAACUGAGCUUGCUC.....         | 6    |
| .....GGUGUAAACUGAGCUUGCUCU.....        | 10   |
| .....GGUGUAAACUGAGCUUGCUCUU.....       | 5    |
| .....GGUGUAAACUGAGCUUGCUCUUU.....      | 5    |
| .....GGUGUAAACUGAGCUUGCUCUUUU.....     | 8    |
| .....GUGUAAACUGAGCUUGCUC.....          | 5    |
| .....GUGUAAACUGAGCUUGCUCU.....         | 3    |
| .....GUGUAAACUGAGCUUGCUCUU.....        | 8    |
| .....GUGUAAACUGAGCUUGCUCUUU.....       | 13   |
| .....GUGUAAACUGAGCUUGCUCUUUU.....      | 11   |
| .....UGUAAACUGAGCUUGC.....             | 44   |
| .....UGUAAACUGAGCUUGCUC.....           | 116  |
| .....UGUAAACUGAGCUUGCUC.....           | 193  |
| .....UGUAAACUGAGCUUGCUCU.....          | 107  |
| .....UGUAAACUGAGCUUGCUCUU.....         | 356  |
| .....UGUAAACUGAGCUUGCUCUUU.....        | 2044 |
| .....UGUAAACUGAGCUUGCUCUUUU.....       | 3042 |

|                               |     |
|-------------------------------|-----|
| .....UGUAAACUGAGCUUGCUCUUUUU  | 205 |
| .....GUA AACUGAGCUUGCUC.....  | 4   |
| .....GUA AACUGAGCUUGCUC.....  | 9   |
| .....GUA AACUGAGCUUGCUC.....  | 13  |
| .....GUA AACUGAGCUUGCUCUU...  | 28  |
| .....GUA AACUGAGCUUGCUCUUU..  | 56  |
| .....GUA AACUGAGCUUGCUCUUUU.. | 93  |
| .....GUA AACUGAGCUUGCUCUUUUU  | 6   |
| .....UAAACUGAGCUUGCUC.....    | 2   |
| .....UAAACUGAGCUUGCUCUU...    | 3   |
| .....UAAACUGAGCUUGCUCUUU..    | 10  |
| .....UAAACUGAGCUUGCUCUUUU..   | 8   |
| .....UAAACUGAGCUUGCUCUUUUU    | 4   |
| .....AAACUGAGCUUGCUCUU...     | 4   |
| .....AAACUGAGCUUGCUCUUU..     | 12  |
| .....AAACUGAGCUUGCUCUUUU..    | 34  |
| .....AACUGAGCUUGCUCUU...      | 3   |
| .....AACUGAGCUUGCUCUUU..      | 8   |
| .....AACUGAGCUUGCUCUUUU..     | 9   |
| .....ACUGAGCUUGCUCUUU..       | 3   |
| .....ACUGAGCUUGCUCUUUU..      | 11  |
| .....CUGAGCUUGCUCUUUU..       | 29  |
| .....CUGAGCUUGCUCUUUUU        | 4   |
| .....UGAGCUUGCUCUUUUU         | 4   |

**#sh1005-C**

|                                                         | Reads |
|---------------------------------------------------------|-------|
| CGAGCAAGCUCAGUUUACACCUUGUCCGACGGUGUAAACUGAGCUUGCUCUUUUU |       |
| CGAGCAAGCUCAGUUUA.....                                  | 3     |
| CGAGCAAGCUCAGUUUAC.....                                 | 4     |
| CGAGCAAGCUCAGUUUACA.....                                | 10    |
| CGAGCAAGCUCAGUUUACAC.....                               | 44    |
| CGAGCAAGCUCAGUUUACACC.....                              | 178   |
| CGAGCAAGCUCAGUUUACACCU.....                             | 31    |
| CGAGCAAGCUCAGUUUACACCUU.....                            | 2     |
| .GAGCAAGCUCAGUUUA.....                                  | 5     |
| .GAGCAAGCUCAGUUUAC.....                                 | 6     |
| .GAGCAAGCUCAGUUUACA.....                                | 20    |
| .GAGCAAGCUCAGUUUACAC.....                               | 152   |
| .GAGCAAGCUCAGUUUACACC.....                              | 1142  |
| .GAGCAAGCUCAGUUUACACCU.....                             | 229   |
| .GAGCAAGCUCAGUUUACACCUU.....                            | 36    |
| .GAGCAAGCUCAGUUUACACCUUG.....                           | 29    |
| .GAGCAAGCUCAGUUUACACCUUGU.....                          | 12    |
| .GAGCAAGCUCAGUUUACACCUUGUC.....                         | 5     |
| .GAGCAAGCUCAGUUUACACCUUGUCC.....                        | 5     |
| .GAGCAAGCUCAGUUUACACCUUGUCCG.....                       | 3     |
| ..AGCAAGCUCAGUUUACA.....                                | 2     |

|                                        |    |
|----------------------------------------|----|
| ..AGCAAGCUCAGUUUACAC.....              | 6  |
| ..AGCAAGCUCAGUUUACACC.....             | 19 |
| ..AGCAAGCUCAGUUUACACCU.....            | 8  |
| ..AGCAAGCUCAGUUUACACCUU.....           | 2  |
| ..GCAAGCUCAGUUUACAC.....               | 2  |
| ..GCAAGCUCAGUUUACACC.....              | 57 |
| ..GCAAGCUCAGUUUACACCU.....             | 6  |
| ..GCAAGCUCAGUUUACACCUU.....            | 2  |
| ..GCAAGCUCAGUUUACACCUUG.....           | 4  |
| ..GCAAGCUCAGUUUACACCUUGUCC.....        | 2  |
| ...CAAGCUCAGUUUACACC.....              | 6  |
| ...CAAGCUCAGUUUACACCU.....             | 4  |
| ....AAGCUCAGUUUACACC.....              | 21 |
| ....AAGCUCAGUUUACACCU.....             | 6  |
| ....AAGCUCAGUUUACACCUUGU.....          | 2  |
| .....AGCUCAGUUUACACCU.....             | 2  |
| .....AGCUCAGUUUACACCUUGU.....          | 2  |
| .....GCUCAGUUUACACCUUGUC.....          | 2  |
| .....UCAGUUUACACCUUGUCCGACGG.....      | 3  |
| .....UACACCUUGUCCGACGGUGU.....         | 2  |
| .....ACCUUGUCCGACGGUGUAAACUGAGC.....   | 2  |
| .....CUUGUCCGACGGUGUA.....             | 2  |
| .....UUGUCCGACGGUGUAAA.....            | 2  |
| .....UUGUCCGACGGUGUAAACUG.....         | 2  |
| .....UUGUCCGACGGUGUAAACUGAGCUUGC.....  | 2  |
| .....UGUCCGACGGUGUAAACUGA.....         | 2  |
| .....GUCCGACGGUGUAAACUGAGCUUGC.....    | 2  |
| .....GUCCGACGGUGUAAACUGAGCUUGCUCU..... | 3  |
| .....UCCGACGGUGUAAACUGA.....           | 2  |
| .....UCCGACGGUGUAAACUGAGCUUGC.....     | 2  |
| .....UCCGACGGUGUAAACUGAGCUUGCUCU.....  | 7  |
| .....UCCGACGGUGUAAACUGAGCUUGCUCUU..... | 13 |
| .....CCGACGGUGUAAACUG.....             | 7  |
| .....CCGACGGUGUAAACUGA.....            | 12 |
| .....CCGACGGUGUAAACUGAG.....           | 31 |
| .....CCGACGGUGUAAACUGAGCUUGC.....      | 5  |
| .....CCGACGGUGUAAACUGAGCUUGCUC.....    | 4  |
| .....CCGACGGUGUAAACUGAGCUUGCUCU.....   | 6  |
| .....CCGACGGUGUAAACUGAGCUUGCUCUU.....  | 14 |
| .....CCGACGGUGUAAACUGAGCUUGCUCUUU..... | 9  |
| .....CGACGGUGUAAACUGA.....             | 5  |
| .....CGACGGUGUAAACUGAG.....            | 10 |
| .....CGACGGUGUAAACUGAGC.....           | 4  |
| .....CGACGGUGUAAACUGAGCUUGC.....       | 3  |
| .....CGACGGUGUAAACUGAGCUUGCUC.....     | 3  |
| .....CGACGGUGUAAACUGAGCUUGCUCU.....    | 5  |
| .....CGACGGUGUAAACUGAGCUUGCUCUU.....   | 15 |

|                                    |      |
|------------------------------------|------|
| .....CGACGGUGUAAACUGAGCUUGCUCUUU.. | 6    |
| .....GACGGUGUAAACUGAGCUUGCUC.....  | 3    |
| .....GACGGUGUAAACUGAGCUUGCUCU....  | 19   |
| .....GACGGUGUAAACUGAGCUUGCUCUU...  | 22   |
| .....GACGGUGUAAACUGAGCUUGCUCUUU..  | 7    |
| .....GACGGUGUAAACUGAGCUUGCUCUUUU.  | 4    |
| .....ACGGUGUAAACUGAGC.....         | 6    |
| .....ACGGUGUAAACUGAGCUU.....       | 2    |
| .....ACGGUGUAAACUGAGCUUGC.....     | 9    |
| .....ACGGUGUAAACUGAGCUUGCUC.....   | 15   |
| .....ACGGUGUAAACUGAGCUUGCUCU....   | 55   |
| .....ACGGUGUAAACUGAGCUUGCUCUU...   | 127  |
| .....ACGGUGUAAACUGAGCUUGCUCUUU..   | 12   |
| .....ACGGUGUAAACUGAGCUUGCUCUUUU.   | 3    |
| .....CGGUGUAAACUGAGCUUGCUCU.....   | 2    |
| .....CGGUGUAAACUGAGCUUGCUC.....    | 2    |
| .....CGGUGUAAACUGAGCUUGCUCU....    | 20   |
| .....CGGUGUAAACUGAGCUUGCUCUU...    | 15   |
| .....CGGUGUAAACUGAGCUUGCUCUUU..    | 7    |
| .....CGGUGUAAACUGAGCUUGCUCUUUU.    | 2    |
| .....GGUGUAAACUGAGCUUGCUC.....     | 6    |
| .....GGUGUAAACUGAGCUUGCUCU....     | 10   |
| .....GGUGUAAACUGAGCUUGCUCUU...     | 11   |
| .....GGUGUAAACUGAGCUUGCUCUUU..     | 5    |
| .....GUGUAAACUGAGCUUGC.....        | 2    |
| .....GUGUAAACUGAGCUUGCUCU....      | 10   |
| .....GUGUAAACUGAGCUUGCUCUU...      | 32   |
| .....GUGUAAACUGAGCUUGCUCUUU..      | 35   |
| .....UGUAAACUGAGCUUGC.....         | 19   |
| .....UGUAAACUGAGCUUGCUCU.....      | 26   |
| .....UGUAAACUGAGCUUGCUC.....       | 131  |
| .....UGUAAACUGAGCUUGCUCU....       | 207  |
| .....UGUAAACUGAGCUUGCUCUU...       | 1461 |
| .....UGUAAACUGAGCUUGCUCUUU..       | 4769 |
| .....UGUAAACUGAGCUUGCUCUUUU.       | 587  |
| .....UGUAAACUGAGCUUGCUCUUUUU.      | 49   |
| .....GUAAACUGAGCUUGCUCU.....       | 2    |
| .....GUAAACUGAGCUUGCUC.....        | 4    |
| .....GUAAACUGAGCUUGCUCU....        | 24   |
| .....GUAAACUGAGCUUGCUCUU...        | 41   |
| .....GUAAACUGAGCUUGCUCUUU..        | 112  |
| .....GUAAACUGAGCUUGCUCUUUU.        | 13   |
| .....UAAACUGAGCUUGCUCU.....        | 2    |
| .....UAAACUGAGCUUGCUCUU...         | 7    |
| .....UAAACUGAGCUUGCUCUUU..         | 20   |
| .....UAAACUGAGCUUGCUCUUUU.         | 7    |
| .....AAACUGAGCUUGCUCU.....         | 7    |

|                            |    |
|----------------------------|----|
| .....AAACUGAGCUUGCUCUU...  | 5  |
| .....AAACUGAGCUUGCUCUUU..  | 25 |
| .....AAACUGAGCUUGCUCUUUU.. | 4  |
| .....AACUGAGCUUGCUCUU...   | 9  |
| .....AACUGAGCUUGCUCUUU..   | 10 |
| .....ACUGAGCUUGCUCUUU..    | 10 |
| .....CUGAGCUUGCUCUUUU..    | 2  |

**#sh1005-TT**

|                                                          | Reads |
|----------------------------------------------------------|-------|
| UUGAGCAAGCUCAGUUUACACCUUGUCCGACGGUGUAAACUGAGCUUGCUCUUUUU |       |
| UUGAGCAAGCUCAGUUUACACC.....                              | 7     |
| .UGAGCAAGCUCAGUUUACAC.....                               | 5     |
| .UGAGCAAGCUCAGUUUACACC.....                              | 34    |
| .UGAGCAAGCUCAGUUUACACCU.....                             | 3     |
| .UGAGCAAGCUCAGUUUACACCUU.....                            | 2     |
| .GAGCAAGCUCAGUUUA.....                                   | 4     |
| .GAGCAAGCUCAGUUUAC.....                                  | 9     |
| .GAGCAAGCUCAGUUUACA.....                                 | 16    |
| .GAGCAAGCUCAGUUUACAC.....                                | 88    |
| .GAGCAAGCUCAGUUUACACC.....                               | 812   |
| .GAGCAAGCUCAGUUUACACCU.....                              | 101   |
| .GAGCAAGCUCAGUUUACACCUU.....                             | 15    |
| .GAGCAAGCUCAGUUUACACCUUG.....                            | 29    |
| .GAGCAAGCUCAGUUUACACCUUGU.....                           | 4     |
| .GAGCAAGCUCAGUUUACACCUUGUC.....                          | 9     |
| .GAGCAAGCUCAGUUUACACCUUGUCC.....                         | 4     |
| .GAGCAAGCUCAGUUUACACCUUGUCCG.....                        | 6     |
| .AGCAAGCUCAGUUUACACC.....                                | 12    |
| .AGCAAGCUCAGUUUACACCUUGU.....                            | 4     |
| ...GCAAGCUCAGUUUACA.....                                 | 2     |
| ...GCAAGCUCAGUUUACAC.....                                | 4     |
| ...GCAAGCUCAGUUUACACC.....                               | 20    |
| ...GCAAGCUCAGUUUACACCU.....                              | 4     |
| ...GCAAGCUCAGUUUACACCUUGUC.....                          | 2     |
| .....AAGCUCAGUUUACACC.....                               | 14    |
| .....AAGCUCAGUUUACACCU.....                              | 3     |
| .....AGCUCAGUUUACACCU.....                               | 3     |
| .....UACACCUUGUCCGACGGUGU.....                           | 3     |
| .....CCUUGUCCGACGGUGUAAAC.....                           | 2     |
| .....CCUUGUCCGACGGUGUAAACUGAG.....                       | 2     |
| .....CUUGUCCGACGGUGUAAA.....                             | 3     |
| .....UUGUCCGACGGUGUAAACUGAG.....                         | 2     |
| .....UUGUCCGACGGUGUAAACUGAGCUUG.....                     | 2     |
| .....UUGUCCGACGGUGUAAACUGAGCUUGC.....                    | 2     |
| .....UGUCCGACGGUGUAAACUGAGCUUGCUC.....                   | 2     |
| .....GUCCGACGGUGUAAACUGAGCUUGCUCU.....                   | 2     |
| .....UCCGACGGUGUAAACUGAGC.....                           | 2     |

|                                        |      |
|----------------------------------------|------|
| .....UCCGACGGUGUAAACUGAGCUUGCUCU.....  | 2    |
| .....CCGACGGUGUAAACUG.....             | 5    |
| .....CCGACGGUGUAAACUGA.....            | 13   |
| .....CCGACGGUGUAAACUGAG.....           | 14   |
| .....CCGACGGUGUAAACUGAGCUUGC.....      | 2    |
| .....CCGACGGUGUAAACUGAGCUUGCUCU.....   | 4    |
| .....CCGACGGUGUAAACUGAGCUUGCUCU.....   | 4    |
| .....CCGACGGUGUAAACUGAGCUUGCUCUU.....  | 15   |
| .....CCGACGGUGUAAACUGAGCUUGCUCUUU..... | 2    |
| .....CGACGGUGUAAACUGAG.....            | 6    |
| .....CGACGGUGUAAACUGAGCUUGCUC.....     | 4    |
| .....CGACGGUGUAAACUGAGCUUGCUCU.....    | 6    |
| .....CGACGGUGUAAACUGAGCUUGCUCUU.....   | 12   |
| .....GACGGUGUAAACUGAGCUUGC.....        | 4    |
| .....GACGGUGUAAACUGAGCUUGCUC.....      | 4    |
| .....GACGGUGUAAACUGAGCUUGCUCU.....     | 3    |
| .....GACGGUGUAAACUGAGCUUGCUCUU.....    | 30   |
| .....GACGGUGUAAACUGAGCUUGCUCUUU.....   | 5    |
| .....GACGGUGUAAACUGAGCUUGCUCUUUU.....  | 4    |
| .....ACGGUGUAAACUGAGCUUGC.....         | 3    |
| .....ACGGUGUAAACUGAGCUUGCUCU.....      | 5    |
| .....ACGGUGUAAACUGAGCUUGCUC.....       | 10   |
| .....ACGGUGUAAACUGAGCUUGCUCU.....      | 52   |
| .....ACGGUGUAAACUGAGCUUGCUCUU.....     | 45   |
| .....ACGGUGUAAACUGAGCUUGCUCUUU.....    | 10   |
| .....ACGGUGUAAACUGAGCUUGCUCUUUU.....   | 2    |
| .....CGGUGUAAACUGAGCUUGCUC.....        | 6    |
| .....CGGUGUAAACUGAGCUUGCUCU.....       | 18   |
| .....CGGUGUAAACUGAGCUUGCUCUU.....      | 9    |
| .....GGUGUAAACUGAGCUUGCUCU.....        | 11   |
| .....GGUGUAAACUGAGCUUGCUCUU.....       | 5    |
| .....GGUGUAAACUGAGCUUGCUCUUU.....      | 2    |
| .....GUGUAAACUGAGCUUGCUCU.....         | 5    |
| .....GUGUAAACUGAGCUUGCUCUU.....        | 17   |
| .....GUGUAAACUGAGCUUGCUCUUU.....       | 23   |
| .....UGUAAACUGAGCUUGC.....             | 19   |
| .....UGUAAACUGAGCUUGCUCU.....          | 35   |
| .....UGUAAACUGAGCUUGCUC.....           | 85   |
| .....UGUAAACUGAGCUUGCUCU.....          | 159  |
| .....UGUAAACUGAGCUUGCUCUU.....         | 1285 |
| .....UGUAAACUGAGCUUGCUCUUU.....        | 4183 |
| .....UGUAAACUGAGCUUGCUCUUUU.....       | 472  |
| .....UGUAAACUGAGCUUGCUCUUUUU.....      | 32   |
| .....GUAAACUGAGCUUGCUC.....            | 8    |
| .....GUAAACUGAGCUUGCUCU.....           | 22   |
| .....GUAAACUGAGCUUGCUCUU.....          | 33   |
| .....GUAAACUGAGCUUGCUCUUU.....         | 80   |

|                            |    |
|----------------------------|----|
| .....GUAACUGAGCUUGCUCUUUU. | 10 |
| .....GUAACUGAGCUUGCUCUUUUU | 3  |
| .....UAAACUGAGCUUGCUCU...  | 4  |
| .....UAAACUGAGCUUGCUCUUU.. | 15 |
| .....UAAACUGAGCUUGCUCUUUU. | 2  |
| .....AAACUGAGCUUGCUCU...   | 2  |
| .....AAACUGAGCUUGCUCUU...  | 4  |
| .....AAACUGAGCUUGCUCUUU..  | 10 |
| .....AACUGAGCUUGCUCUUU..   | 6  |
| .....ACUGAGCUUGCUCUUU..    | 9  |
| .....CUGAGCUUGCUCUUUU.     | 5  |

**#sh1005-TTT**

|                                                           | Reads |
|-----------------------------------------------------------|-------|
| UUUGAGCAAGCUCAGUUUACACCUUGUCCGACGGUGUAAACUGAGCUUGCUCUUUUU |       |
| .UUGAGCAAGCUCAGUUUACACC.....                              | 19    |
| .UGAGCAAGCUCAGUUUACAC.....                                | 8     |
| .UGAGCAAGCUCAGUUUACACC.....                               | 52    |
| .UGAGCAAGCUCAGUUUACACCU.....                              | 31    |
| .GAGCAAGCUCAGUUUA.....                                    | 6     |
| .GAGCAAGCUCAGUUUAC.....                                   | 16    |
| .GAGCAAGCUCAGUUUACA.....                                  | 10    |
| .GAGCAAGCUCAGUUUACAC.....                                 | 94    |
| .GAGCAAGCUCAGUUUACACC.....                                | 604   |
| .GAGCAAGCUCAGUUUACACCU.....                               | 95    |
| .GAGCAAGCUCAGUUUACACCUU.....                              | 2     |
| .GAGCAAGCUCAGUUUACACCUUG.....                             | 14    |
| .GAGCAAGCUCAGUUUACACCUUGU.....                            | 3     |
| .GAGCAAGCUCAGUUUACACCUUGUC.....                           | 2     |
| .GAGCAAGCUCAGUUUACACCUUGUCCG.....                         | 2     |
| .GCAAGCUCAGUUUACACC.....                                  | 5     |
| .GCAAGCUCAGUUUACAC.....                                   | 2     |
| .GCAAGCUCAGUUUACACC.....                                  | 31    |
| .GCAAGCUCAGUUUACACCU.....                                 | 3     |
| .GCAAGCUCAGUUUACACCUU.....                                | 3     |
| .GCAAGCUCAGUUUACACCUUGU.....                              | 2     |
| .GCAAGCUCAGUUUACACCUUGUCCGACG.....                        | 2     |
| .CAAGCUCAGUUUACACC.....                                   | 3     |
| .CAAGCUCAGUUUACACCU.....                                  | 2     |
| .AAGCUCAGUUUACACC.....                                    | 5     |
| .AAGCUCAGUUUACACCU.....                                   | 2     |
| .....GUCCGACGGUGUAAACUGAGCUUGCUCU...                      | 2     |
| .....UCCGACGGUGUAAACUGAGCUUGCUCU...                       | 2     |
| .....CCGACGGUGUAAACUGAG.....                              | 6     |
| .....CCGACGGUGUAAACUGAGCUUGCUCU...                        | 7     |
| .....CCGACGGUGUAAACUGAGCUUGCUCUU...                       | 5     |
| .....CGACGGUGUAAACUGAG.....                               | 3     |
| .....CGACGGUGUAAACUGAGCUUGCUCUU...                        | 2     |



|                                    |      |
|------------------------------------|------|
| .....CGACGGUGUAAACUGAGCUUGCUCUUU.. | 2    |
| .....GACGGUGUAAACUGAGCUUGCUCU...   | 7    |
| .....GACGGUGUAAACUGAGCUUGCUCUU..   | 6    |
| .....GACGGUGUAAACUGAGCUUGCUCUUU..  | 3    |
| .....GACGGUGUAAACUGAGCUUGCUCUUUU.  | 3    |
| .....ACGGUGUAAACUGAGCUUGCUCU.....  | 3    |
| .....ACGGUGUAAACUGAGCUUGCUC.....   | 3    |
| .....ACGGUGUAAACUGAGCUUGCUCU....   | 8    |
| .....ACGGUGUAAACUGAGCUUGCUCUU..    | 6    |
| .....ACGGUGUAAACUGAGCUUGCUCUUU..   | 4    |
| .....CGGUGUAAACUGAGCUUGCUCU.....   | 2    |
| .....CGGUGUAAACUGAGCUUGCUCU....    | 11   |
| .....CGGUGUAAACUGAGCUUGCUCUUU..    | 3    |
| .....GGUGUAAACUGAGCUUGCUCU....     | 2    |
| .....GGUGUAAACUGAGCUUGCUCUU....    | 6    |
| .....GGUGUAAACUGAGCUUGCUCUUU..     | 5    |
| .....GUGUAAACUGAGCUUGCUCUU....     | 19   |
| .....GUGUAAACUGAGCUUGCUCUUU..      | 19   |
| .....GUGUAAACUGAGCUUGCUCUUUU..     | 2    |
| .....UGUAAACUGAGCUUGC.....         | 19   |
| .....UGUAAACUGAGCUUGCUCU.....      | 58   |
| .....UGUAAACUGAGCUUGCUC.....       | 107  |
| .....UGUAAACUGAGCUUGCUCU....       | 69   |
| .....UGUAAACUGAGCUUGCUCUU....      | 641  |
| .....UGUAAACUGAGCUUGCUCUUU..       | 2173 |
| .....UGUAAACUGAGCUUGCUCUUUU..      | 264  |
| .....UGUAAACUGAGCUUGCUCUUUUUU      | 16   |
| .....GUAACUGAGCUUGCUC.....         | 5    |
| .....GUAACUGAGCUUGCUCU....         | 14   |
| .....GUAACUGAGCUUGCUCUU....        | 21   |
| .....GUAACUGAGCUUGCUCUUU..         | 47   |
| .....GUAACUGAGCUUGCUCUUUU..        | 15   |
| .....UAAACUGAGCUUGCUCUUU..         | 15   |
| .....UAAACUGAGCUUGCUCUUUU..        | 2    |
| .....AAACUGAGCUUGCUCU....          | 8    |
| .....AAACUGAGCUUGCUCUU....         | 8    |
| .....AAACUGAGCUUGCUCUUU..          | 15   |
| .....AAACUGAGCUUGCUCUUUU..         | 2    |
| .....AACUGAGCUUGCUCUUU..           | 5    |
| .....ACUGAGCUUGCUCUUU..            | 6    |

**#sh1005-TTTT**

|                                                            |       |
|------------------------------------------------------------|-------|
| UUUUGAGCAAGCUCAGUUUACACCUUGUCCGACGGUGUAAACUGAGCUUGCUCUUUUU | Reads |
| UUUUGAGCAAGCUCAGUUUACAC.....                               | 2     |
| .UUUUGAGCAAGCUCAGUUUACACC.....                             | 5     |
| ..UUGAGCAAGCUCAGUUUACAC.....                               | 2     |
| ..UUGAGCAAGCUCAGUUUACACC.....                              | 6     |

|                                      |      |
|--------------------------------------|------|
| ...UGAGCAAGCUCAGUUUACAC.....         | 5    |
| ...UGAGCAAGCUCAGUUUACACC.....        | 7    |
| ...UGAGCAAGCUCAGUUUACACCU.....       | 5    |
| ...GAGCAAGCUCAGUUUAC.....            | 2    |
| ...GAGCAAGCUCAGUUUACA.....           | 3    |
| ...GAGCAAGCUCAGUUUACAC.....          | 49   |
| ...GAGCAAGCUCAGUUUACACC.....         | 396  |
| ...GAGCAAGCUCAGUUUACACCU.....        | 39   |
| ...GAGCAAGCUCAGUUUACACCUUG.....      | 5    |
| ...GAGCAAGCUCAGUUUACACCUUGUC.....    | 2    |
| ...AGCAAGCUCAGUUUACACC.....          | 3    |
| ...GCAAGCUCAGUUUACACC.....           | 11   |
| ...CAAGCUCAGUUUACACC.....            | 7    |
| ...CAAGCUCAGUUUACACCU.....           | 4    |
| ...AAGCUCAGUUUACACC.....             | 7    |
| ...UGUCCGACGGUGUAAACUGAGCUUGC.....   | 2    |
| ...CCGACGGUGUAAACUG.....             | 2    |
| ...CCGACGGUGUAAACUGAGCUUGCUCUU.....  | 2    |
| ...CCGACGGUGUAAACUGAGCUUGCUCUUU..... | 3    |
| ...CGGUGUAAACUGAGCUUGCUC.....        | 3    |
| ...GGUGUAAACUGAGCUUGCUCUUUU.....     | 2    |
| ...GUGUAAACUGAGCUUGCUCUU.....        | 20   |
| ...GUGUAAACUGAGCUUGCUCUUU.....       | 12   |
| ...UGUAAACUGAGCUUGC.....             | 7    |
| ...UGUAAACUGAGCUUGC.....             | 43   |
| ...UGUAAACUGAGCUUGCUC.....           | 65   |
| ...UGUAAACUGAGCUUGCUCU.....          | 51   |
| ...UGUAAACUGAGCUUGCUCUU.....         | 539  |
| ...UGUAAACUGAGCUUGCUCUUU.....        | 1954 |
| ...UGUAAACUGAGCUUGCUCUUUU.....       | 205  |
| ...UGUAAACUGAGCUUGCUCUUUUU.....      | 9    |
| ...GUAACUGAGCUUGCUC.....             | 3    |
| ...GUAACUGAGCUUGCUCU.....            | 4    |
| ...GUAACUGAGCUUGCUCUU.....           | 23   |
| ...GUAACUGAGCUUGCUCUUU.....          | 59   |
| ...GUAACUGAGCUUGCUCUUUU.....         | 7    |
| ...UAAACUGAGCUUGCUCUU.....           | 5    |
| ...UAAACUGAGCUUGCUCUUU.....          | 10   |
| ...AAACUGAGCUUGCUCUU.....            | 3    |
| ...AAACUGAGCUUGCUCUUU.....           | 11   |
| ...AACUGAGCUUGCUCUUU.....            | 7    |
| ...ACUGAGCUUGCUCUUU.....             | 10   |
| ...CUGAGCUUGCUCUUUU.....             | 4    |

**#sh1005-TA**

|                                                          |       |
|----------------------------------------------------------|-------|
| UAGAGCAAGCUCAGUUUACACCUUGUCCGACGGUGUAAACUGAGCUUGCUCUUUUU | Reads |
| UAGAGCAAGCUCAGUUUACAC.....                               | 4     |

|                                                                     |      |
|---------------------------------------------------------------------|------|
| UAGAGCAAGCUCAGUUUACACC . . . . .                                    | 33   |
| UAGAGCAAGCUCAGUUUACACCU . . . . .                                   | 3    |
| .AGAGCAAGCUCAGUUU . . . . .                                         | 14   |
| .AGAGCAAGCUCAGUUUA . . . . .                                        | 52   |
| .AGAGCAAGCUCAGUUUAC . . . . .                                       | 89   |
| .AGAGCAAGCUCAGUUUACA . . . . .                                      | 313  |
| .AGAGCAAGCUCAGUUUACAC . . . . .                                     | 1118 |
| .AGAGCAAGCUCAGUUUACACC . . . . .                                    | 8306 |
| .AGAGCAAGCUCAGUUUACACCU . . . . .                                   | 902  |
| .AGAGCAAGCUCAGUUUACACCUU . . . . .                                  | 64   |
| .AGAGCAAGCUCAGUUUACACCUUG . . . . .                                 | 18   |
| .AGAGCAAGCUCAGUUUACACCUUGU . . . . .                                | 15   |
| .AGAGCAAGCUCAGUUUACACCUUGUC . . . . .                               | 26   |
| .AGAGCAAGCUCAGUUUACACCUUGUCC . . . . .                              | 30   |
| .AGAGCAAGCUCAGUUUACACCUUGUCCG . . . . .                             | 5    |
| . .GAGCAAGCUCAGUUUAC . . . . .                                      | 2    |
| . .GAGCAAGCUCAGUUUACAC . . . . .                                    | 18   |
| . .GAGCAAGCUCAGUUUACACC . . . . .                                   | 150  |
| . .GAGCAAGCUCAGUUUACACCU . . . . .                                  | 9    |
| . .GAGCAAGCUCAGUUUACACCUU . . . . .                                 | 3    |
| . .GAGCAAGCUCAGUUUACACCUUG . . . . .                                | 2    |
| . . .AGCAAGCUCAGUUUACAC . . . . .                                   | 2    |
| . . .AGCAAGCUCAGUUUACACC . . . . .                                  | 48   |
| . . . .GCAAGCUCAGUUUACAC . . . . .                                  | 4    |
| . . . .GCAAGCUCAGUUUACACC . . . . .                                 | 34   |
| . . . .GCAAGCUCAGUUUACACCUUG . . . . .                              | 2    |
| . . . .GCAAGCUCAGUUUACACCUUGU . . . . .                             | 3    |
| . . . . .CAAGCUCAGUUUACAC . . . . .                                 | 2    |
| . . . . .CAAGCUCAGUUUACACC . . . . .                                | 19   |
| . . . . .CAAGCUCAGUUUACACCU . . . . .                               | 3    |
| . . . . .CAAGCUCAGUUUACACCUUGU . . . . .                            | 2    |
| . . . . . .AAGCUCAGUUUACACC . . . . .                               | 30   |
| . . . . . .AAGCUCAGUUUACACCU . . . . .                              | 10   |
| . . . . . .AAGCUCAGUUUACACCUUG . . . . .                            | 2    |
| . . . . . .AAGCUCAGUUUACACCUUGU . . . . .                           | 4    |
| . . . . . . .AGCUCAGUUUACACCUUGU . . . . .                          | 3    |
| . . . . . . .GCUCAGUUUACACCUUGUC . . . . .                          | 4    |
| . . . . . . . .UACACCUUGUCCGACGGUGU . . . . .                       | 2    |
| . . . . . . . . .ACACCUUGUCCGACGGU . . . . .                        | 2    |
| . . . . . . . . . .CACCUUGUCCGACGGUGUAAACUGAGC . . . . .            | 2    |
| . . . . . . . . . . .CCUUGUCCGACGGUGUAAACUGAGCUU . . . . .          | 2    |
| . . . . . . . . . . .CUUGUCCGACGGUGUAAACUGA . . . . .               | 2    |
| . . . . . . . . . . . .UUGUCCGACGGUGUAAAC . . . . .                 | 2    |
| . . . . . . . . . . . .UUGUCCGACGGUGUAAACUGAG . . . . .             | 2    |
| . . . . . . . . . . . . .UUGUCCGACGGUGUAAACUGAGCUUGC . . . . .      | 3    |
| . . . . . . . . . . . . . .UGUCCGACGGUGUAAACUGAGCUUGC . . . . .     | 2    |
| . . . . . . . . . . . . . . .UGUCCGACGGUGUAAACUGAGCUUGCUC . . . . . | 7    |

|                                       |     |
|---------------------------------------|-----|
| .....GUCCGACGGUGUAAACUGAGCU.....      | 2   |
| .....GUCCGACGGUGUAAACUGAGCUUGCUCU.... | 2   |
| .....UCCGACGGUGUAAACUG.....           | 3   |
| .....UCCGACGGUGUAAACUGAGCUUGCUCUU.... | 4   |
| .....CCGACGGUGUAAACUG.....            | 4   |
| .....CCGACGGUGUAAACUGA.....           | 14  |
| .....CCGACGGUGUAAACUGAG.....          | 27  |
| .....CCGACGGUGUAAACUGAGCUUGCUC.....   | 8   |
| .....CCGACGGUGUAAACUGAGCUUGCUCUU....  | 6   |
| .....CCGACGGUGUAAACUGAGCUUGCUCUUU..   | 15  |
| .....CGACGGUGUAAACUGA.....            | 11  |
| .....CGACGGUGUAAACUGAG.....           | 16  |
| .....CGACGGUGUAAACUGAGCU.....         | 3   |
| .....CGACGGUGUAAACUGAGCUUGC.....      | 2   |
| .....CGACGGUGUAAACUGAGCUUGCUC.....    | 7   |
| .....CGACGGUGUAAACUGAGCUUGCUCUU....   | 9   |
| .....CGACGGUGUAAACUGAGCUUGCUCUUU..    | 39  |
| .....CGACGGUGUAAACUGAGCUUGCUCUUUU..   | 2   |
| .....GACGGUGUAAACUGAGCUUGCUC.....     | 10  |
| .....GACGGUGUAAACUGAGCUUGCUCU....     | 4   |
| .....GACGGUGUAAACUGAGCUUGCUCUU....    | 14  |
| .....GACGGUGUAAACUGAGCUUGCUCUUU..     | 48  |
| .....GACGGUGUAAACUGAGCUUGCUCUUUU..    | 4   |
| .....ACGGUGUAAACUGAGCUUGC.....        | 3   |
| .....ACGGUGUAAACUGAGCUUGCUC.....      | 10  |
| .....ACGGUGUAAACUGAGCUUGCUCU....      | 7   |
| .....ACGGUGUAAACUGAGCUUGCUCUU....     | 31  |
| .....ACGGUGUAAACUGAGCUUGCUCUUU..      | 44  |
| .....ACGGUGUAAACUGAGCUUGCUCUUUU..     | 2   |
| .....CGGUGUAAACUGAGCUUGC.....         | 3   |
| .....CGGUGUAAACUGAGCUUGCUC.....       | 2   |
| .....CGGUGUAAACUGAGCUUGCUCU....       | 3   |
| .....CGGUGUAAACUGAGCUUGCUCUU....      | 14  |
| .....CGGUGUAAACUGAGCUUGCUCUUU..       | 21  |
| .....CGGUGUAAACUGAGCUUGCUCUUUU..      | 3   |
| .....GGUGUAAACUGAGCUUGCUC.....        | 3   |
| .....GGUGUAAACUGAGCUUGCUCU....        | 2   |
| .....GGUGUAAACUGAGCUUGCUCUU....       | 4   |
| .....GGUGUAAACUGAGCUUGCUCUUU..        | 16  |
| .....GGUGUAAACUGAGCUUGCUCUUUU..       | 2   |
| .....GUGUAAACUGAGCUUGC.....           | 2   |
| .....GUGUAAACUGAGCUUGCUC.....         | 10  |
| .....GUGUAAACUGAGCUUGCUC.....         | 27  |
| .....GUGUAAACUGAGCUUGCUCU....         | 3   |
| .....GUGUAAACUGAGCUUGCUCUU....        | 74  |
| .....GUGUAAACUGAGCUUGCUCUUU..         | 434 |
| .....GUGUAAACUGAGCUUGCUCUUUU..        | 46  |

|                                   |       |
|-----------------------------------|-------|
| .....GUGUAAACUGAGCUUGCUCUUUUU     | 7     |
| .....UGUAAACUGAGCUUGC.....        | 41    |
| .....UGUAAACUGAGCUUGC.....        | 97    |
| .....UGUAAACUGAGCUUGC.....        | 260   |
| .....UGUAAACUGAGCUUGCUC.....      | 174   |
| .....UGUAAACUGAGCUUGCUCU.....     | 1195  |
| .....UGUAAACUGAGCUUGCUCUU.....    | 11992 |
| .....UGUAAACUGAGCUUGCUCUUUU.....  | 1859  |
| .....UGUAAACUGAGCUUGCUCUUUUU..... | 166   |
| .....GUAAACUGAGCUUGCUC.....       | 5     |
| .....GUAAACUGAGCUUGCUC.....       | 7     |
| .....GUAAACUGAGCUUGCUCU.....      | 24    |
| .....GUAAACUGAGCUUGCUCUU.....     | 166   |
| .....GUAAACUGAGCUUGCUCUUUU.....   | 47    |
| .....GUAAACUGAGCUUGCUCUUUUU.....  | 3     |
| .....UAAACUGAGCUUGCUCUU.....      | 28    |
| .....UAAACUGAGCUUGCUCUUUU.....    | 8     |
| .....UAAACUGAGCUUGCUCUUUUU.....   | 2     |
| .....AAACUGAGCUUGCUC.....         | 2     |
| .....AAACUGAGCUUGCUCU.....        | 4     |
| .....AAACUGAGCUUGCUCUU.....       | 24    |
| .....AAACUGAGCUUGCUCUUUU.....     | 7     |
| .....AACUGAGCUUGCUCU.....         | 2     |
| .....AACUGAGCUUGCUCUU.....        | 8     |
| .....AACUGAGCUUGCUCUUUU.....      | 7     |
| .....ACUGAGCUUGCUCUU.....         | 3     |

**#sh1005-TTA**

|                                                           | Reads |
|-----------------------------------------------------------|-------|
| UUAGAGCAAGCUCAGUUUACACCUUGUCCGACGGUGUAAACUGAGCUUGCUCUUUUU |       |
| ..UAGAGCAAGCUCAGUUUACACC.....                             | 9     |
| ..AGAGCAAGCUCAGUUU.....                                   | 6     |
| ..AGAGCAAGCUCAGUUUA.....                                  | 28    |
| ..AGAGCAAGCUCAGUUUAC.....                                 | 56    |
| ..AGAGCAAGCUCAGUUUACA.....                                | 260   |
| ..AGAGCAAGCUCAGUUUACAC.....                               | 543   |
| ..AGAGCAAGCUCAGUUUACACC.....                              | 4442  |
| ..AGAGCAAGCUCAGUUUACACCU.....                             | 351   |
| ..AGAGCAAGCUCAGUUUACACCUU.....                            | 32    |
| ..AGAGCAAGCUCAGUUUACACCUUG.....                           | 15    |
| ..AGAGCAAGCUCAGUUUACACCUUGU.....                          | 7     |
| ..AGAGCAAGCUCAGUUUACACCUUGUC.....                         | 17    |
| ..AGAGCAAGCUCAGUUUACACCUUGUCC.....                        | 10    |
| ...GAGCAAGCUCAGUUUACAC.....                               | 6     |
| ...GAGCAAGCUCAGUUUACACC.....                              | 72    |
| ...GAGCAAGCUCAGUUUACACCU.....                             | 2     |
| ...AGCAAGCUCAGUUUACACC.....                               | 48    |
| ...AGCAAGCUCAGUUUACACCU.....                              | 3     |

|                                       |    |
|---------------------------------------|----|
| .....GCAAGCUCAGUUUACAC.....           | 4  |
| .....GCAAGCUCAGUUUACACC.....          | 12 |
| .....CAAGCUCAGUUUACACC.....           | 10 |
| .....CAAGCUCAGUUUACACCUUGU.....       | 2  |
| .....AAGCUCAGUUUACACC.....            | 18 |
| .....AAGCUCAGUUUACACCU.....           | 9  |
| .....AGCUCAGUUUACACCUUGU.....         | 2  |
| .....UACACCUUGUCCGACGGUGU.....        | 3  |
| .....CUUGUCCGACGGUGUAAA.....          | 2  |
| .....UUGUCCGACGGUGUAAA.....           | 3  |
| .....UUGUCCGACGGUGUAAACUGAGC.....     | 2  |
| .....UCCGACGGUGUAAACUGAGCUUGC.....    | 3  |
| .....UCCGACGGUGUAAACUGAGCUUGCUCU..... | 3  |
| .....CCGACGGUGUAAACUG.....            | 3  |
| .....CCGACGGUGUAAACUGA.....           | 2  |
| .....CCGACGGUGUAAACUGAG.....          | 7  |
| .....CCGACGGUGUAAACUGAGCUUGC.....     | 2  |
| .....CCGACGGUGUAAACUGAGCUUGCUCU.....  | 4  |
| .....CCGACGGUGUAAACUGAGCUUGCUCU.....  | 7  |
| .....CCGACGGUGUAAACUGAGCUUGCUCUU..... | 9  |
| .....CGACGGUGUAAACUGAG.....           | 4  |
| .....CGACGGUGUAAACUGAGC.....          | 2  |
| .....CGACGGUGUAAACUGAGCUUGC.....      | 2  |
| .....CGACGGUGUAAACUGAGCUUGCUC.....    | 4  |
| .....CGACGGUGUAAACUGAGCUUGCUCU.....   | 4  |
| .....CGACGGUGUAAACUGAGCUUGCUCUU.....  | 13 |
| .....CGACGGUGUAAACUGAGCUUGCUCUU.....  | 23 |
| .....GACGGUGUAAACUGAGCUUGC.....       | 3  |
| .....GACGGUGUAAACUGAGCUUGCUC.....     | 8  |
| .....GACGGUGUAAACUGAGCUUGCUCU.....    | 12 |
| .....GACGGUGUAAACUGAGCUUGCUCUU.....   | 15 |
| .....GACGGUGUAAACUGAGCUUGCUCUU.....   | 20 |
| .....GACGGUGUAAACUGAGCUUGCUCUUU.....  | 2  |
| .....ACGGUGUAAACUGAGCUUGCUC.....      | 2  |
| .....ACGGUGUAAACUGAGCUUGCUCU.....     | 8  |
| .....ACGGUGUAAACUGAGCUUGCUCUU.....    | 11 |
| .....ACGGUGUAAACUGAGCUUGCUCUU.....    | 28 |
| .....ACGGUGUAAACUGAGCUUGCUCUUU.....   | 3  |
| .....CGGUGUAAACUGAGCUUGCUCU.....      | 5  |
| .....CGGUGUAAACUGAGCUUGCUCUU.....     | 3  |
| .....CGGUGUAAACUGAGCUUGCUCUU.....     | 8  |
| .....GGUGUAAACUGAGCUUGCUCU.....       | 2  |
| .....GGUGUAAACUGAGCUUGCUCUU.....      | 4  |
| .....GGUGUAAACUGAGCUUGCUCUU.....      | 4  |
| .....GUGUAAACUGAGCUUGC.....           | 2  |
| .....GUGUAAACUGAGCUUGC.....           | 2  |
| .....GUGUAAACUGAGCUUGCUC.....         | 5  |

|                               |      |
|-------------------------------|------|
| .....GUGUAAACUGAGCUUGCUCU.... | 2    |
| .....GUGUAAACUGAGCUUGCUCUU... | 30   |
| .....GUGUAAACUGAGCUUGCUCUUU.. | 221  |
| .....GUGUAAACUGAGCUUGCUCUUUU. | 19   |
| .....UGUAAACUGAGCUUGC.....    | 11   |
| .....UGUAAACUGAGCUUGC.....    | 34   |
| .....UGUAAACUGAGCUUGC.....    | 121  |
| .....UGUAAACUGAGCUUGCUC.....  | 136  |
| .....UGUAAACUGAGCUUGCUCUU...  | 487  |
| .....UGUAAACUGAGCUUGCUCUUU..  | 5580 |
| .....UGUAAACUGAGCUUGCUCUUUU.  | 835  |
| .....UGUAAACUGAGCUUGCUCUUUUU  | 60   |
| .....GUAACUGAGCUUGCUC.....    | 4    |
| .....GUAACUGAGCUUGCUCUU...    | 2    |
| .....GUAACUGAGCUUGCUCUU...    | 7    |
| .....GUAACUGAGCUUGCUCUUU..    | 111  |
| .....GUAACUGAGCUUGCUCUUUU.    | 27   |
| .....UAAACUGAGCUUGCUCUU..     | 3    |
| .....UAAACUGAGCUUGCUCUUU..    | 23   |
| .....UAAACUGAGCUUGCUCUUUU.    | 4    |
| .....AAACUGAGCUUGCUCU....     | 3    |
| .....AAACUGAGCUUGCUCUUU..     | 25   |
| .....AAACUGAGCUUGCUCUUUU.     | 10   |
| .....AACUGAGCUUGCUCUUU..      | 4    |
| .....ACUGAGCUUGCUCUUU..       | 5    |
| .....CUGAGCUUGCUCUUUU.        | 8    |

**#sh1005-TTTA**

|                                                            | Reads |
|------------------------------------------------------------|-------|
| UUUAGAGCAAGCUCAGUUUACACCUUGUCCGACGGUGUAAACUGAGCUUGCUCUUUUU |       |
| ..UAGAGCAAGCUCAGUUUACACC.....                              | 28    |
| ...AGAGCAAGCUCAGUUU.....                                   | 7     |
| ...AGAGCAAGCUCAGUUUA.....                                  | 26    |
| ...AGAGCAAGCUCAGUUUAC.....                                 | 25    |
| ...AGAGCAAGCUCAGUUUACA.....                                | 88    |
| ...AGAGCAAGCUCAGUUUACAC.....                               | 370   |
| ...AGAGCAAGCUCAGUUUACACC.....                              | 2870  |
| ...AGAGCAAGCUCAGUUUACACCU.....                             | 375   |
| ...AGAGCAAGCUCAGUUUACACCUU.....                            | 36    |
| ...AGAGCAAGCUCAGUUUACACCUUG.....                           | 3     |
| ...AGAGCAAGCUCAGUUUACACCUUGUC.....                         | 3     |
| ...AGAGCAAGCUCAGUUUACACCUUGUCC.....                        | 4     |
| ...AGAGCAAGCUCAGUUUACACCUUGUCCG.....                       | 4     |
| ....GAGCAAGCUCAGUUUACAC.....                               | 2     |
| ....GAGCAAGCUCAGUUUACACC.....                              | 44    |
| ....GAGCAAGCUCAGUUUACACCU.....                             | 10    |
| ....AGCAAGCUCAGUUUACACC.....                               | 31    |
| ....AGCAAGCUCAGUUUACACCU.....                              | 4     |

|                                        |      |
|----------------------------------------|------|
| .....GCAAGCUCAGUUUACAC.....            | 2    |
| .....GCAAGCUCAGUUUACACC.....           | 17   |
| .....GCAAGCUCAGUUUACACCU.....          | 3    |
| .....CAAGCUCAGUUUACACC.....            | 7    |
| .....CAAGCUCAGUUUACACCUUG.....         | 2    |
| .....AAGCUCAGUUUACACC.....             | 24   |
| .....AAGCUCAGUUUACACCU.....            | 4    |
| .....AAGCUCAGUUUACACCUUGU.....         | 2    |
| .....UGUCCGACGGUGUAAAC.....            | 2    |
| .....UCCGACGGUGUAAACUGAG.....          | 2    |
| .....UCCGACGGUGUAAACUGAGCUUGCUCU.....  | 2    |
| .....CCGACGGUGUAAACUGAG.....           | 2    |
| .....CCGACGGUGUAAACUGAGCUUGCUCUU.....  | 2    |
| .....CCGACGGUGUAAACUGAGCUUGCUCUUU..... | 3    |
| .....CGACGGUGUAAACUGAG.....            | 2    |
| .....CGACGGUGUAAACUGAGCUUGCUC.....     | 2    |
| .....CGACGGUGUAAACUGAGCUUGCUCUU.....   | 3    |
| .....CGACGGUGUAAACUGAGCUUGCUCUUU.....  | 4    |
| .....CGACGGUGUAAACUGAGCUUGCUCUUUU..... | 2    |
| .....GACGGUGUAAACUGAGCUUGCUC.....      | 2    |
| .....GACGGUGUAAACUGAGCUUGCUCUU.....    | 4    |
| .....GACGGUGUAAACUGAGCUUGCUCUUU.....   | 12   |
| .....ACGGUGUAAACUGAGCUUGCUC.....       | 5    |
| .....ACGGUGUAAACUGAGCUUGCUCUU.....     | 5    |
| .....ACGGUGUAAACUGAGCUUGCUCUUU.....    | 2    |
| .....CGGUGUAAACUGAGCUUGCUC.....        | 2    |
| .....CGGUGUAAACUGAGCUUGCUCU.....       | 2    |
| .....CGGUGUAAACUGAGCUUGCUCUUU.....     | 3    |
| .....GGUGUAAACUGAGCUUGCUCU.....        | 3    |
| .....GGUGUAAACUGAGCUUGCUCUU.....       | 2    |
| .....GUGUAAACUGAGCUUGCUCU.....         | 2    |
| .....GUGUAAACUGAGCUUGCUC.....          | 5    |
| .....GUGUAAACUGAGCUUGCUCU.....         | 7    |
| .....GUGUAAACUGAGCUUGCUCUU.....        | 38   |
| .....GUGUAAACUGAGCUUGCUCUUU.....       | 243  |
| .....GUGUAAACUGAGCUUGCUCUUUU.....      | 23   |
| .....GUGUAAACUGAGCUUGCUCUUUUU.....     | 4    |
| .....UGUAAACUGAGCUUGC.....             | 14   |
| .....UGUAAACUGAGCUUGCUCU.....          | 49   |
| .....UGUAAACUGAGCUUGCUC.....           | 108  |
| .....UGUAAACUGAGCUUGCUCU.....          | 67   |
| .....UGUAAACUGAGCUUGCUCUU.....         | 309  |
| .....UGUAAACUGAGCUUGCUCUUU.....        | 4883 |
| .....UGUAAACUGAGCUUGCUCUUUU.....       | 698  |
| .....UGUAAACUGAGCUUGCUCUUUUU.....      | 47   |
| .....GUAAACUGAGCUUGCUC.....            | 2    |
| .....GUAAACUGAGCUUGCUCU.....           | 2    |



|                            |     |
|----------------------------|-----|
| .....GUAACUGAGCUUGCUCUU... | 13  |
| .....GUAACUGAGCUUGCUCUU..  | 118 |
| .....GUAACUGAGCUUGCUCUUUU. | 24  |
| .....GUAACUGAGCUUGCUCUUUUU | 3   |
| .....UAAACUGAGCUUGCUCUUU.. | 28  |
| .....UAAACUGAGCUUGCUCUUUU. | 6   |
| .....UAAACUGAGCUUGCUCUUUUU | 2   |
| .....AAACUGAGCUUGCUCUU...  | 4   |
| .....AAACUGAGCUUGCUCUUU..  | 19  |
| .....AAACUGAGCUUGCUCUUUU.  | 7   |
| .....AACUGAGCUUGCUCUU...   | 4   |
| .....AACUGAGCUUGCUCUUU..   | 12  |
| .....ACUGAGCUUGCUCUUU..    | 15  |
| .....ACUGAGCUUGCUCUUUU.    | 2   |
| .....CUGAGCUUGCUCUUUU.     | 2   |
| .....UGAGCUUGCUCUUUUU      | 3   |

**#sh1005-TC**

|                                                          | Reads |
|----------------------------------------------------------|-------|
| UCGAGCAAGCUCAGUUUACACCUUGUCCGACGGUGUAAACUGAGCUUGCUCUUUUU |       |
| UCGAGCAAGCUCAGUUU.....                                   | 2     |
| UCGAGCAAGCUCAGUUUAC.....                                 | 4     |
| UCGAGCAAGCUCAGUUUACA.....                                | 34    |
| UCGAGCAAGCUCAGUUUACAC.....                               | 47    |
| UCGAGCAAGCUCAGUUUACACC.....                              | 165   |
| .CGAGCAAGCUCAGUUUAC.....                                 | 2     |
| .CGAGCAAGCUCAGUUUACA.....                                | 15    |
| .CGAGCAAGCUCAGUUUACAC.....                               | 34    |
| .CGAGCAAGCUCAGUUUACACC.....                              | 319   |
| .CGAGCAAGCUCAGUUUACACCU.....                             | 34    |
| .CGAGCAAGCUCAGUUUACACCUU.....                            | 2     |
| .CGAGCAAGCUCAGUUUACACCUUGU.....                          | 2     |
| ..GAGCAAGCUCAGUUUA.....                                  | 2     |
| ..GAGCAAGCUCAGUUUAC.....                                 | 12    |
| ..GAGCAAGCUCAGUUUACA.....                                | 15    |
| ..GAGCAAGCUCAGUUUACAC.....                               | 136   |
| ..GAGCAAGCUCAGUUUACACC.....                              | 1453  |
| ..GAGCAAGCUCAGUUUACACCU.....                             | 178   |
| ..GAGCAAGCUCAGUUUACACCUU.....                            | 26    |
| ..GAGCAAGCUCAGUUUACACCUUG.....                           | 35    |
| ..GAGCAAGCUCAGUUUACACCUUGU.....                          | 9     |
| ..GAGCAAGCUCAGUUUACACCUUGUC.....                         | 4     |
| ..GAGCAAGCUCAGUUUACACCUUGUCC.....                        | 10    |
| ..GAGCAAGCUCAGUUUACACCUUGUCCG.....                       | 3     |
| ...AGCAAGCUCAGUUUACACC.....                              | 13    |
| ...AGCAAGCUCAGUUUACACCU.....                             | 3     |
| ...GCAAGCUCAGUUUACACC.....                               | 43    |
| ...GCAAGCUCAGUUUACACCU.....                              | 4     |

|                                        |    |
|----------------------------------------|----|
| .....GCAAGCUCAGUUUACACCUUG.....        | 2  |
| .....GCAAGCUCAGUUUACACCUUGU.....       | 3  |
| .....CAAGCUCAGUUUACACC.....            | 6  |
| .....CAAGCUCAGUUUACACCUUGU.....        | 2  |
| .....AAGCUCAGUUUACACC.....             | 26 |
| .....AAGCUCAGUUUACACCU.....            | 3  |
| .....AAGCUCAGUUUACACCUUGU.....         | 2  |
| .....AAGCUCAGUUUACACCUUGUC.....        | 2  |
| .....AGCUCAGUUUACACCU.....             | 3  |
| .....CUCAGUUUACACCUUG.....             | 2  |
| .....UCAGUUUACACCUUGUCCGACGG.....      | 3  |
| .....UUACACCUUGUCCGACGGUGUAAACU.....   | 2  |
| .....ACCUUGUCCGACGGUGUAAACUGA.....     | 2  |
| .....ACCUUGUCCGACGGUGUAAACUGAGCU.....  | 2  |
| .....CCUUGUCCGACGGUGUAAA.....          | 5  |
| .....CCUUGUCCGACGGUGUAAACUGAGC.....    | 4  |
| .....CUUGUCCGACGGUGUAAACUG.....        | 3  |
| .....UUGUCCGACGGUGUAAACUG.....         | 2  |
| .....UUGUCCGACGGUGUAAACUGAGCUUGC.....  | 2  |
| .....UGUCCGACGGUGUAAACUGAGCUUGC.....   | 2  |
| .....UGUCCGACGGUGUAAACUGAGCUUGCUC..... | 6  |
| .....GUCCGACGGUGUAAACUGAGCUUGCUC.....  | 3  |
| .....GUCCGACGGUGUAAACUGAGCUUGCUCU..... | 2  |
| .....UCCGACGGUGUAAACUG.....            | 2  |
| .....UCCGACGGUGUAAACUGA.....           | 3  |
| .....UCCGACGGUGUAAACUGAGC.....         | 2  |
| .....UCCGACGGUGUAAACUGAGCUUGCUCU.....  | 11 |
| .....UCCGACGGUGUAAACUGAGCUUGCUCUU..... | 13 |
| .....CCGACGGUGUAAACUG.....             | 4  |
| .....CCGACGGUGUAAACUGA.....            | 19 |
| .....CCGACGGUGUAAACUGAG.....           | 34 |
| .....CCGACGGUGUAAACUGAGC.....          | 4  |
| .....CCGACGGUGUAAACUGAGCUUGCUC.....    | 3  |
| .....CCGACGGUGUAAACUGAGCUUGCUCU.....   | 15 |
| .....CCGACGGUGUAAACUGAGCUUGCUCUU.....  | 31 |
| .....CCGACGGUGUAAACUGAGCUUGCUCUUU..... | 6  |
| .....CGACGGUGUAAACUGA.....             | 2  |
| .....CGACGGUGUAAACUGAG.....            | 7  |
| .....CGACGGUGUAAACUGAGC.....           | 3  |
| .....CGACGGUGUAAACUGAGCUUGC.....       | 5  |
| .....CGACGGUGUAAACUGAGCUUGCUCU.....    | 8  |
| .....CGACGGUGUAAACUGAGCUUGCUCUU.....   | 20 |
| .....CGACGGUGUAAACUGAGCUUGCUCUUU.....  | 3  |
| .....GACGGUGUAAACUGAG.....             | 2  |
| .....GACGGUGUAAACUGAGCUUGC.....        | 4  |
| .....GACGGUGUAAACUGAGCUUGCUC.....      | 4  |
| .....GACGGUGUAAACUGAGCUUGCUCU.....     | 2  |

|                                   |      |
|-----------------------------------|------|
| .....GACGGUGUAAACUGAGCUUGCUCU.... | 18   |
| .....GACGGUGUAAACUGAGCUUGCUCUU..  | 35   |
| .....GACGGUGUAAACUGAGCUUGCUCUUU.. | 16   |
| .....ACGGUGUAAACUGAGCUUGC.....    | 8    |
| .....ACGGUGUAAACUGAGCUUGC.....    | 3    |
| .....ACGGUGUAAACUGAGCUUGCUC.....  | 10   |
| .....ACGGUGUAAACUGAGCUUGCUCU....  | 50   |
| .....ACGGUGUAAACUGAGCUUGCUCUU..   | 90   |
| .....ACGGUGUAAACUGAGCUUGCUCUUU..  | 10   |
| .....ACGGUGUAAACUGAGCUUGCUCUUUU.. | 2    |
| .....CGGUGUAAACUGAGCUUGC.....     | 2    |
| .....CGGUGUAAACUGAGCUUGCUC.....   | 3    |
| .....CGGUGUAAACUGAGCUUGCUCU....   | 25   |
| .....CGGUGUAAACUGAGCUUGCUCUU..    | 15   |
| .....CGGUGUAAACUGAGCUUGCUCUUU..   | 2    |
| .....GGUGUAAACUGAGCUUGC.....      | 3    |
| .....GGUGUAAACUGAGCUUGCUC.....    | 2    |
| .....GGUGUAAACUGAGCUUGCUCU....    | 15   |
| .....GGUGUAAACUGAGCUUGCUCUU..     | 22   |
| .....GGUGUAAACUGAGCUUGCUCUUU..    | 2    |
| .....GUGUAAACUGAGCUUGC.....       | 2    |
| .....GUGUAAACUGAGCUUGCUC.....     | 2    |
| .....GUGUAAACUGAGCUUGCUCU....     | 7    |
| .....GUGUAAACUGAGCUUGCUCUU..      | 34   |
| .....GUGUAAACUGAGCUUGCUCUUU..     | 37   |
| .....GUGUAAACUGAGCUUGCUCUUUU..    | 5    |
| .....UGUAAACUGAGCUUGC.....        | 26   |
| .....UGUAAACUGAGCUUGC.....        | 23   |
| .....UGUAAACUGAGCUUGCUC.....      | 105  |
| .....UGUAAACUGAGCUUGCUCU....      | 189  |
| .....UGUAAACUGAGCUUGCUCUU..       | 1654 |
| .....UGUAAACUGAGCUUGCUCUUU..      | 5370 |
| .....UGUAAACUGAGCUUGCUCUUUU..     | 510  |
| .....UGUAAACUGAGCUUGCUCUUUUU      | 46   |
| .....GUAAACUGAGCUUGCUCU....       | 20   |
| .....GUAAACUGAGCUUGCUCUU..        | 51   |
| .....GUAAACUGAGCUUGCUCUUU..       | 113  |
| .....GUAAACUGAGCUUGCUCUUUU..      | 7    |
| .....GUAAACUGAGCUUGCUCUUUUU       | 2    |
| .....UAAACUGAGCUUGCUCU....        | 3    |
| .....UAAACUGAGCUUGCUCUU..         | 6    |
| .....UAAACUGAGCUUGCUCUUU..        | 31   |
| .....UAAACUGAGCUUGCUCUUUU..       | 2    |
| .....AAACUGAGCUUGCUCU....         | 5    |
| .....AAACUGAGCUUGCUCUU..          | 13   |
| .....AAACUGAGCUUGCUCUUU..         | 40   |
| .....AAACUGAGCUUGCUCUUUU..        | 5    |

|                           |    |
|---------------------------|----|
| .....AACUGAGCUUGCUCUU...  | 7  |
| .....AACUGAGCUUGCUCUUU..  | 12 |
| .....AACUGAGCUUGCUCUUUU.. | 2  |
| .....ACUGAGCUUGCUCUUU..   | 8  |
| .....ACUGAGCUUGCUCUUUU..  | 3  |
| .....CUGAGCUUGCUCUUUU..   | 3  |

**#sh1005-TTC**

|                                                           | Reads |
|-----------------------------------------------------------|-------|
| UUCGAGCAAGCUCAGUUUACACCUUGUCCGACGGUGUAAACUGAGCUUGCUCUUUUU |       |
| UUCGAGCAAGCUCAGUUUACAC.....                               | 3     |
| UUCGAGCAAGCUCAGUUUACACC.....                              | 10    |
| .UCGAGCAAGCUCAGUUUACA.....                                | 55    |
| .UCGAGCAAGCUCAGUUUACAC.....                               | 83    |
| .UCGAGCAAGCUCAGUUUACACC.....                              | 328   |
| .UCGAGCAAGCUCAGUUUACACCU.....                             | 7     |
| ..CGAGCAAGCUCAGUUUACA.....                                | 18    |
| ..CGAGCAAGCUCAGUUUACAC.....                               | 39    |
| ..CGAGCAAGCUCAGUUUACACC.....                              | 371   |
| ..CGAGCAAGCUCAGUUUACACCU.....                             | 43    |
| ..CGAGCAAGCUCAGUUUACACCUUGU.....                          | 2     |
| ..GAGCAAGCUCAGUUUA.....                                   | 3     |
| ..GAGCAAGCUCAGUUUAC.....                                  | 3     |
| ..GAGCAAGCUCAGUUUACA.....                                 | 9     |
| ..GAGCAAGCUCAGUUUACAC.....                                | 54    |
| ..GAGCAAGCUCAGUUUACACC.....                               | 560   |
| ..GAGCAAGCUCAGUUUACACCU.....                              | 85    |
| ..GAGCAAGCUCAGUUUACACCUU.....                             | 8     |
| ..GAGCAAGCUCAGUUUACACCUUG.....                            | 15    |
| ..GAGCAAGCUCAGUUUACACCUUGUCC.....                         | 4     |
| ...AGCAAGCUCAGUUUACACC.....                               | 6     |
| ....GCAAGCUCAGUUUACACC.....                               | 16    |
| ....GCAAGCUCAGUUUACACCU.....                              | 7     |
| ....GCAAGCUCAGUUUACACCUU.....                             | 9     |
| ....GCAAGCUCAGUUUACACCUUG.....                            | 4     |
| .....CAAGCUCAGUUUACACC.....                               | 6     |
| .....AAGCUCAGUUUACACC.....                                | 13    |
| .....UUGUCCGACGGUGUAAACU.....                             | 2     |
| .....UGUCCGACGGUGUAAACUGAG.....                           | 2     |
| .....GUCCGACGGUGUAAACUGAGC.....                           | 2     |
| .....UCCGACGGUGUAAACUGAGCUUGCUCUU..                       | 10    |
| .....CCGACGGUGUAAACUGAG.....                              | 5     |
| .....CCGACGGUGUAAACUGAGCUUGCUC.....                       | 3     |
| .....CCGACGGUGUAAACUGAGCUUGCUCUU..                        | 9     |
| .....CCGACGGUGUAAACUGAGCUUGCUCUUU..                       | 2     |
| .....CGACGGUGUAAACUGA.....                                | 3     |
| .....CGACGGUGUAAACUGAGCUUGC.....                          | 3     |
| .....CGACGGUGUAAACUGAGCUUGCUCUU..                         | 10    |

|                                    |      |
|------------------------------------|------|
| .....CGACGGUGUAAACUGAGCUUGCUCUUU.. | 2    |
| .....GACGGUGUAAACUGAGCUUGC.....    | 2    |
| .....GACGGUGUAAACUGAGCUUGCUCU... . | 4    |
| .....GACGGUGUAAACUGAGCUUGCUCUU..   | 12   |
| .....GACGGUGUAAACUGAGCUUGCUCUUU..  | 5    |
| .....ACGGUGUAAACUGAGCUUGC.....     | 2    |
| .....ACGGUGUAAACUGAGCUUGC.....     | 2    |
| .....ACGGUGUAAACUGAGCUUGCUC.....   | 4    |
| .....ACGGUGUAAACUGAGCUUGCUCU... .  | 11   |
| .....ACGGUGUAAACUGAGCUUGCUCUU... . | 18   |
| .....ACGGUGUAAACUGAGCUUGCUCUUU..   | 6    |
| .....CGGUGUAAACUGAGCUUGC.....      | 2    |
| .....CGGUGUAAACUGAGCUUGCUCUU... .  | 7    |
| .....CGGUGUAAACUGAGCUUGCUCUUU..    | 3    |
| .....GGUGUAAACUGAGCUUGCUCU... .    | 3    |
| .....GGUGUAAACUGAGCUUGCUCUU... .   | 7    |
| .....GGUGUAAACUGAGCUUGCUCUUU... .  | 3    |
| .....GGUGUAAACUGAGCUUGCUCUUUUU..   | 2    |
| .....GUGUAAACUGAGCUUGCUCU... .     | 8    |
| .....GUGUAAACUGAGCUUGCUCUU... .    | 24   |
| .....GUGUAAACUGAGCUUGCUCUUU... .   | 30   |
| .....UGUAAACUGAGCUUGC.....         | 8    |
| .....UGUAAACUGAGCUUGC.....         | 35   |
| .....UGUAAACUGAGCUUGCUC.....       | 57   |
| .....UGUAAACUGAGCUUGCUCU... .      | 73   |
| .....UGUAAACUGAGCUUGCUCUU... .     | 691  |
| .....UGUAAACUGAGCUUGCUCUUU... .    | 3117 |
| .....UGUAAACUGAGCUUGCUCUUUU... .   | 302  |
| .....UGUAAACUGAGCUUGCUCUUUUU..     | 14   |
| .....GUAACUGAGCUUGCUC.....         | 2    |
| .....GUAACUGAGCUUGCUCU... .        | 16   |
| .....GUAACUGAGCUUGCUCUU... .       | 26   |
| .....GUAACUGAGCUUGCUCUUU... .      | 56   |
| .....GUAACUGAGCUUGCUCUUUU... .     | 11   |
| .....UAAACUGAGCUUGCUCU... .        | 3    |
| .....UAAACUGAGCUUGCUCUU... .       | 2    |
| .....UAAACUGAGCUUGCUCUUU... .      | 22   |
| .....UAAACUGAGCUUGCUCUUUU... .     | 2    |
| .....AAACUGAGCUUGCUCUU... .        | 3    |
| .....AAACUGAGCUUGCUCUUU... .       | 9    |
| .....AAACUGAGCUUGCUCUUUU... .      | 2    |
| .....AACUGAGCUUGCUCUU... .         | 2    |
| .....AACUGAGCUUGCUCUUU... .        | 5    |
| .....ACUGAGCUUGCUCUUU... .         | 4    |
| .....CUGAGCUUGCUCUUUU... .         | 2    |

|                                                          | Reads |
|----------------------------------------------------------|-------|
| CUGAGCAAGCUCAGUUUACACCUUGUCCGACGGUGUAAACUGAGCUUGCUCUUUUU | 7     |
| CUGAGCAAGCUCAGUUUAC . . . . .                            | 32    |
| CUGAGCAAGCUCAGUUUACA . . . . .                           | 28    |
| CUGAGCAAGCUCAGUUUACAC . . . . .                          | 704   |
| .UGAGCAAGCUCAGUUUAC . . . . .                            | 2     |
| .UGAGCAAGCUCAGUUUACA . . . . .                           | 21    |
| .UGAGCAAGCUCAGUUUACAC . . . . .                          | 25    |
| .UGAGCAAGCUCAGUUUACACC . . . . .                         | 209   |
| .UGAGCAAGCUCAGUUUACACCU . . . . .                        | 35    |
| .UGAGCAAGCUCAGUUUACACCUU . . . . .                       | 3     |
| .UGAGCAAGCUCAGUUUACACCUUGUCC . . . . .                   | 3     |
| ..GAGCAAGCUCAGUUUA . . . . .                             | 9     |
| ..GAGCAAGCUCAGUUUAC . . . . .                            | 12    |
| ..GAGCAAGCUCAGUUUACA . . . . .                           | 27    |
| ..GAGCAAGCUCAGUUUACAC . . . . .                          | 172   |
| ..GAGCAAGCUCAGUUUACACC . . . . .                         | 1482  |
| ..GAGCAAGCUCAGUUUACACCU . . . . .                        | 257   |
| ..GAGCAAGCUCAGUUUACACCUU . . . . .                       | 29    |
| ..GAGCAAGCUCAGUUUACACCUUG . . . . .                      | 37    |
| ..GAGCAAGCUCAGUUUACACCUUGU . . . . .                     | 7     |
| ..GAGCAAGCUCAGUUUACACCUUGUC . . . . .                    | 6     |
| ..GAGCAAGCUCAGUUUACACCUUGUCC . . . . .                   | 5     |
| ..GAGCAAGCUCAGUUUACACCUUGUCCG . . . . .                  | 2     |
| ..GAGCAAGCUCAGUUUACACCUUGUCCGA . . . . .                 | 4     |
| ..AGCAAGCUCAGUUUACAC . . . . .                           | 3     |
| ..AGCAAGCUCAGUUUACACC . . . . .                          | 20    |
| ..AGCAAGCUCAGUUUACACCU . . . . .                         | 4     |
| ...GCAAGCUCAGUUUACAC . . . . .                           | 3     |
| ...GCAAGCUCAGUUUACACC . . . . .                          | 47    |
| ...GCAAGCUCAGUUUACACCU . . . . .                         | 6     |
| ...GCAAGCUCAGUUUACACCUUG . . . . .                       | 2     |
| ...GCAAGCUCAGUUUACACCUUGU . . . . .                      | 2     |
| ....CAAGCUCAGUUUACACC . . . . .                          | 7     |
| ....CAAGCUCAGUUUACACCU . . . . .                         | 3     |
| ....CAAGCUCAGUUUACACCUU . . . . .                        | 2     |
| .....AAGCUCAGUUUACACC . . . . .                          | 24    |
| .....AAGCUCAGUUUACACCU . . . . .                         | 7     |
| .....AGCUCAGUUUACACCUUGU . . . . .                       | 2     |
| .....UUACACCUUGUCCGACGGUGUA . . . . .                    | 2     |
| .....UACACCUUGUCCGACGGUGU . . . . .                      | 4     |
| .....ACCUUGUCCGACGGUGUAAACUGAG . . . . .                 | 3     |
| .....ACCUUGUCCGACGGUGUAAACUGAGCUU . . . . .              | 2     |
| .....CUUGUCCGACGGUGUAA . . . . .                         | 2     |
| .....UUGUCCGACGGUGUAA . . . . .                          | 3     |
| .....UUGUCCGACGGUGUAAACU . . . . .                       | 2     |
| .....UGUCCGACGGUGUAAAC . . . . .                         | 2     |

|                                        |    |
|----------------------------------------|----|
| .....UGUCCGACGGUGUAAACUGAGCU.....      | 5  |
| .....UGUCCGACGGUGUAAACUGAGCUUGC.....   | 3  |
| .....UGUCCGACGGUGUAAACUGAGCUUGCUC..... | 2  |
| .....GUCCGACGGUGUAAACUGAGCUUGC.....    | 5  |
| .....GUCCGACGGUGUAAACUGAGCUUGCUCU..... | 4  |
| .....UCCGACGGUGUAAACUGAGC.....         | 2  |
| .....UCCGACGGUGUAAACUGAGCUU.....       | 3  |
| .....UCCGACGGUGUAAACUGAGCUUGC.....     | 4  |
| .....UCCGACGGUGUAAACUGAGCUUGCUC.....   | 4  |
| .....UCCGACGGUGUAAACUGAGCUUGCUCU.....  | 8  |
| .....UCCGACGGUGUAAACUGAGCUUGCUCUU..... | 26 |
| .....CCGACGGUGUAAACUG.....             | 7  |
| .....CCGACGGUGUAAACUGA.....            | 15 |
| .....CCGACGGUGUAAACUGAG.....           | 21 |
| .....CCGACGGUGUAAACUGAGCUUGC.....      | 3  |
| .....CCGACGGUGUAAACUGAGCUUGCUC.....    | 3  |
| .....CCGACGGUGUAAACUGAGCUUGCUCU.....   | 11 |
| .....CCGACGGUGUAAACUGAGCUUGCUCUU.....  | 26 |
| .....CCGACGGUGUAAACUGAGCUUGCUCUUU..... | 10 |
| .....CGACGGUGUAAACUGA.....             | 4  |
| .....CGACGGUGUAAACUGAG.....            | 16 |
| .....CGACGGUGUAAACUGAGCU.....          | 2  |
| .....CGACGGUGUAAACUGAGCUUGC.....       | 6  |
| .....CGACGGUGUAAACUGAGCUUGCUC.....     | 8  |
| .....CGACGGUGUAAACUGAGCUUGCUCU.....    | 13 |
| .....CGACGGUGUAAACUGAGCUUGCUCUU.....   | 23 |
| .....CGACGGUGUAAACUGAGCUUGCUCUUU.....  | 11 |
| .....CGACGGUGUAAACUGAGCUUGCUCUUUU..... | 4  |
| .....GACGGUGUAAACUGAGC.....            | 2  |
| .....GACGGUGUAAACUGAGCUUGC.....        | 6  |
| .....GACGGUGUAAACUGAGCUUGCUC.....      | 8  |
| .....GACGGUGUAAACUGAGCUUGCUC.....      | 13 |
| .....GACGGUGUAAACUGAGCUUGCUCU.....     | 25 |
| .....GACGGUGUAAACUGAGCUUGCUCUU.....    | 45 |
| .....GACGGUGUAAACUGAGCUUGCUCUUU.....   | 17 |
| .....GACGGUGUAAACUGAGCUUGCUCUUUU.....  | 2  |
| .....GACGGUGUAAACUGAGCUUGCUCUUUUU..... | 2  |
| .....ACGGUGUAAACUGAGC.....             | 4  |
| .....ACGGUGUAAACUGAGCU.....            | 2  |
| .....ACGGUGUAAACUGAGCUUGC.....         | 7  |
| .....ACGGUGUAAACUGAGCUUGCUC.....       | 12 |
| .....ACGGUGUAAACUGAGCUUGCUC.....       | 9  |
| .....ACGGUGUAAACUGAGCUUGCUCU.....      | 65 |
| .....ACGGUGUAAACUGAGCUUGCUCUU.....     | 93 |
| .....ACGGUGUAAACUGAGCUUGCUCUUU.....    | 14 |
| .....ACGGUGUAAACUGAGCUUGCUCUUUU.....   | 3  |
| .....CGGUGUAAACUGAGCUUGC.....          | 2  |

|                                     |      |
|-------------------------------------|------|
| .....CGGUGUAAACUGAGCUUGC.....       | 2    |
| .....CGGUGUAAACUGAGCUUGCUC.....     | 8    |
| .....CGGUGUAAACUGAGCUUGCUCU.....    | 22   |
| .....CGGUGUAAACUGAGCUUGCUCUU.....   | 13   |
| .....CGGUGUAAACUGAGCUUGCUCUUU.....  | 13   |
| .....CGGUGUAAACUGAGCUUGCUCUUUU..... | 2    |
| .....GGUGUAAACUGAGCUUGCUC.....      | 2    |
| .....GGUGUAAACUGAGCUUGCUCU.....     | 15   |
| .....GGUGUAAACUGAGCUUGCUCUU.....    | 10   |
| .....GGUGUAAACUGAGCUUGCUCUUU.....   | 6    |
| .....GUGUAAACUGAGCUUGCUC.....       | 2    |
| .....GUGUAAACUGAGCUUGCUCU.....      | 7    |
| .....GUGUAAACUGAGCUUGCUCUU.....     | 33   |
| .....GUGUAAACUGAGCUUGCUCUUU.....    | 23   |
| .....GUGUAAACUGAGCUUGCUCUUUU.....   | 2    |
| .....UGUAAACUGAGCUUGC.....          | 32   |
| .....UGUAAACUGAGCUUGC.....          | 61   |
| .....UGUAAACUGAGCUUGCUC.....        | 104  |
| .....UGUAAACUGAGCUUGCUCU.....       | 164  |
| .....UGUAAACUGAGCUUGCUCUU.....      | 1381 |
| .....UGUAAACUGAGCUUGCUCUUU.....     | 4448 |
| .....UGUAAACUGAGCUUGCUCUUUU.....    | 561  |
| .....UGUAAACUGAGCUUGCUCUUUUU.....   | 37   |
| .....GUAAACUGAGCUUGCUC.....         | 6    |
| .....GUAAACUGAGCUUGCUCU.....        | 28   |
| .....GUAAACUGAGCUUGCUCUU.....       | 46   |
| .....GUAAACUGAGCUUGCUCUUU.....      | 89   |
| .....GUAAACUGAGCUUGCUCUUUU.....     | 25   |
| .....UAAACUGAGCUUGCUC.....          | 3    |
| .....UAAACUGAGCUUGCUCU.....         | 3    |
| .....UAAACUGAGCUUGCUCUU.....        | 3    |
| .....UAAACUGAGCUUGCUCUUU.....       | 16   |
| .....UAAACUGAGCUUGCUCUUUU.....      | 2    |
| .....AAACUGAGCUUGCUCU.....          | 6    |
| .....AAACUGAGCUUGCUCUU.....         | 8    |
| .....AAACUGAGCUUGCUCUUU.....        | 28   |
| .....AAACUGAGCUUGCUCUUUU.....       | 2    |
| .....AACUGAGCUUGCUCUU.....          | 5    |
| .....AACUGAGCUUGCUCUUU.....         | 8    |
| .....ACUGAGCUUGCUCUUU.....          | 7    |

**#sh1005-TG**

|                                                          |       |
|----------------------------------------------------------|-------|
| UGGAGCAAGCUCAGUUUACACCUUGUCCGACGGUGUAAACUGAGCUUGCUCUUUUU | Reads |
| UGGAGCAAGCUCAGUUUAC.....                                 | 2     |
| UGGAGCAAGCUCAGUUUACA.....                                | 8     |
| UGGAGCAAGCUCAGUUUACAC.....                               | 10    |
| UGGAGCAAGCUCAGUUUACACC.....                              | 118   |



|                                    |      |
|------------------------------------|------|
| .GGAGCAAGCUCAGUUU.....             | 4    |
| .GGAGCAAGCUCAGUUUA.....            | 17   |
| .GGAGCAAGCUCAGUUUAC.....           | 18   |
| .GGAGCAAGCUCAGUUUACA.....          | 62   |
| .GGAGCAAGCUCAGUUUACAC.....         | 228  |
| .GGAGCAAGCUCAGUUUACACC.....        | 1485 |
| .GGAGCAAGCUCAGUUUACACCU.....       | 293  |
| .GGAGCAAGCUCAGUUUACACCUU.....      | 34   |
| .GGAGCAAGCUCAGUUUACACCUUG.....     | 21   |
| .GGAGCAAGCUCAGUUUACACCUUGU.....    | 6    |
| .GGAGCAAGCUCAGUUUACACCUUGUC.....   | 7    |
| .GGAGCAAGCUCAGUUUACACCUUGUCC.....  | 7    |
| .GGAGCAAGCUCAGUUUACACCUUGUCCG..... | 2    |
| .GAGCAAGCUCAGUUUACAC.....          | 6    |
| .GAGCAAGCUCAGUUUACACC.....         | 99   |
| .GAGCAAGCUCAGUUUACACCU.....        | 9    |
| .AGCAAGCUCAGUUUACACC.....          | 9    |
| .GCAAGCUCAGUUUACACC.....           | 38   |
| .GCAAGCUCAGUUUACACCU.....          | 3    |
| .GCAAGCUCAGUUUACACCUUG.....        | 3    |
| .GCAAGCUCAGUUUACACCUUGU.....       | 3    |
| .CAAGCUCAGUUUACACC.....            | 8    |
| .CAAGCUCAGUUUACACCU.....           | 5    |
| .CAAGCUCAGUUUACACCUUG.....         | 3    |
| .CAAGCUCAGUUUACACCUUGU.....        | 2    |
| .AAGCUCAGUUUACACC.....             | 17   |
| .AAGCUCAGUUUACACCU.....            | 4    |
| .AAGCUCAGUUUACACCUUGU.....         | 3    |
| .GCUCAGUUUACACCUUGUCCGA.....       | 2    |
| .CUCAGUUUACACCUUGU.....            | 2    |
| .UACACCUUGUCCGACGGUGU.....         | 2    |
| .CUUGUCCGACGGUGUAAACUG.....        | 3    |
| .UUGUCCGACGGUGUAAACUG.....         | 3    |
| .UGUCCGACGGUGUAAACUGAGCUUGCUC..... | 2    |
| .GUCCGACGGUGUAAACUG.....           | 2    |
| .GUCCGACGGUGUAAACUGAGC.....        | 2    |
| .UCCGACGGUGUAAACUGAGCUUGCUC.....   | 2    |
| .UCCGACGGUGUAAACUGAGCUUGCUCU.....  | 2    |
| .CCGACGGUGUAAACUG.....             | 9    |
| .CCGACGGUGUAAACUGA.....            | 12   |
| .CCGACGGUGUAAACUGAG.....           | 29   |
| .CCGACGGUGUAAACUGAGCUUGCUCUU.....  | 2    |
| .CCGACGGUGUAAACUGAGCUUGCUCUUU..... | 8    |
| .CGACGGUGUAAACUGA.....             | 4    |
| .CGACGGUGUAAACUGAG.....            | 13   |
| .CGACGGUGUAAACUGAGC.....           | 2    |
| .CGACGGUGUAAACUGAGCUUGCUCU.....    | 2    |

|                                     |      |
|-------------------------------------|------|
| .....CGACGGUGUAAACUGAGCUUGCUCUU...  | 4    |
| .....CGACGGUGUAAACUGAGCUUGCUCUUU... | 8    |
| .....CGACGGUGUAAACUGAGCUUGCUCUUUU.  | 7    |
| .....GACGGUGUAAACUGAGCUU.....       | 2    |
| .....GACGGUGUAAACUGAGCUUGCUC.....   | 2    |
| .....GACGGUGUAAACUGAGCUUGCUCU.....  | 5    |
| .....GACGGUGUAAACUGAGCUUGCUCUU...   | 9    |
| .....GACGGUGUAAACUGAGCUUGCUCUUU..   | 15   |
| .....GACGGUGUAAACUGAGCUUGCUCUUUU.   | 18   |
| .....ACGGUGUAAACUGAGCU.....         | 2    |
| .....ACGGUGUAAACUGAGCUUGC.....      | 4    |
| .....ACGGUGUAAACUGAGCUUGC.....      | 3    |
| .....ACGGUGUAAACUGAGCUUGCUC.....    | 6    |
| .....ACGGUGUAAACUGAGCUUGCUCU....    | 16   |
| .....ACGGUGUAAACUGAGCUUGCUCUU...    | 48   |
| .....ACGGUGUAAACUGAGCUUGCUCUUU..    | 30   |
| .....ACGGUGUAAACUGAGCUUGCUCUUUU.    | 15   |
| .....CGGUGUAAACUGAGCUUGC.....       | 3    |
| .....CGGUGUAAACUGAGCUUGCUC.....     | 7    |
| .....CGGUGUAAACUGAGCUUGCUCU.....    | 10   |
| .....CGGUGUAAACUGAGCUUGCUCUU...     | 6    |
| .....CGGUGUAAACUGAGCUUGCUCUUU..     | 4    |
| .....CGGUGUAAACUGAGCUUGCUCUUUU.     | 8    |
| .....GGUGUAAACUGAGCUUGCUCU.....     | 5    |
| .....GGUGUAAACUGAGCUUGCUCUU...      | 3    |
| .....GGUGUAAACUGAGCUUGCUCUUU..      | 13   |
| .....GGUGUAAACUGAGCUUGCUCUUUU.      | 11   |
| .....GUGUAAACUGAGCUUGCUCUU...       | 4    |
| .....GUGUAAACUGAGCUUGCUCUUU..       | 4    |
| .....GUGUAAACUGAGCUUGCUCUUUU.       | 6    |
| .....UGUAAACUGAGCUUGC.....          | 21   |
| .....UGUAAACUGAGCUUGC.....          | 36   |
| .....UGUAAACUGAGCUUGCUC.....        | 80   |
| .....UGUAAACUGAGCUUGCUCU.....       | 65   |
| .....UGUAAACUGAGCUUGCUCUU...        | 253  |
| .....UGUAAACUGAGCUUGCUCUUU..        | 1893 |
| .....UGUAAACUGAGCUUGCUCUUUU.        | 2722 |
| .....UGUAAACUGAGCUUGCUCUUUUU        | 227  |
| .....GUAAACUGAGCUUGC.....           | 3    |
| .....GUAAACUGAGCUUGCUC.....         | 3    |
| .....GUAAACUGAGCUUGCUCU.....        | 5    |
| .....GUAAACUGAGCUUGCUCUU...         | 15   |
| .....GUAAACUGAGCUUGCUCUUU..         | 52   |
| .....GUAAACUGAGCUUGCUCUUUU.         | 71   |
| .....GUAAACUGAGCUUGCUCUUUUU         | 6    |
| .....UAAACUGAGCUUGCUCU.....         | 4    |
| .....UAAACUGAGCUUGCUCUUU..          | 9    |

|                            |    |
|----------------------------|----|
| .....UAAACUGAGCUUGCUCUUUU. | 16 |
| .....UAAACUGAGCUUGCUCUUUUU | 4  |
| .....AAACUGAGCUUGCUCU....  | 2  |
| .....AAACUGAGCUUGCUCUUU..  | 12 |
| .....AAACUGAGCUUGCUCUUUU.  | 19 |
| .....AACUGAGCUUGCUCUUU..   | 6  |
| .....AACUGAGCUUGCUCUUUU.   | 2  |
| .....ACUGAGCUUGCUCUUU..    | 3  |
| .....ACUGAGCUUGCUCUUUU.    | 8  |
| .....CUGAGCUUGCUCUUUU.     | 18 |
| .....UGAGCUUGCUCUUUUU      | 2  |

**#sh1005-CA**

|                                                          | Reads |
|----------------------------------------------------------|-------|
| CAGAGCAAGCUCAGUUUACACCUUGUCCGACGGUGUAAACUGAGCUUGCUCUUUUU |       |
| CAGAGCAAGCUCAGUUUA.....                                  | 2     |
| CAGAGCAAGCUCAGUUUAC.....                                 | 2     |
| CAGAGCAAGCUCAGUUUACA.....                                | 11    |
| CAGAGCAAGCUCAGUUUACAC.....                               | 33    |
| CAGAGCAAGCUCAGUUUACACC.....                              | 290   |
| CAGAGCAAGCUCAGUUUACACCU.....                             | 4     |
| .AGAGCAAGCUCAGUUU.....                                   | 20    |
| .AGAGCAAGCUCAGUUUA.....                                  | 48    |
| .AGAGCAAGCUCAGUUUAC.....                                 | 63    |
| .AGAGCAAGCUCAGUUUACA.....                                | 203   |
| .AGAGCAAGCUCAGUUUACAC.....                               | 818   |
| .AGAGCAAGCUCAGUUUACACC.....                              | 7183  |
| .AGAGCAAGCUCAGUUUACACCU.....                             | 886   |
| .AGAGCAAGCUCAGUUUACACCUU.....                            | 72    |
| .AGAGCAAGCUCAGUUUACACCUUG.....                           | 41    |
| .AGAGCAAGCUCAGUUUACACCUUGU.....                          | 12    |
| .AGAGCAAGCUCAGUUUACACCUUGUC.....                         | 10    |
| .AGAGCAAGCUCAGUUUACACCUUGUCC.....                        | 5     |
| .AGAGCAAGCUCAGUUUACACCUUGUCCG.....                       | 5     |
| ..GAGCAAGCUCAGUUUACA.....                                | 2     |
| ..GAGCAAGCUCAGUUUACAC.....                               | 21    |
| ..GAGCAAGCUCAGUUUACACC.....                              | 140   |
| ..GAGCAAGCUCAGUUUACACCU.....                             | 25    |
| ..GAGCAAGCUCAGUUUACACCUU.....                            | 6     |
| ..GAGCAAGCUCAGUUUACACCUUGUCC.....                        | 2     |
| ...AGCAAGCUCAGUUUACA.....                                | 2     |
| ...AGCAAGCUCAGUUUACAC.....                               | 2     |
| ...AGCAAGCUCAGUUUACACC.....                              | 60    |
| ...AGCAAGCUCAGUUUACACCU.....                             | 10    |
| ....GCAAGCUCAGUUUACAC.....                               | 5     |
| ....GCAAGCUCAGUUUACACC.....                              | 54    |
| ....GCAAGCUCAGUUUACACCU.....                             | 3     |
| ....GCAAGCUCAGUUUACACCUUG.....                           | 2     |

|                                        |    |
|----------------------------------------|----|
| .....GCAAGCUCAGUUUACACCUUGU.....       | 3  |
| .....CAAGCUCAGUUUACACC.....            | 17 |
| .....AAGCUCAGUUUACACC.....             | 37 |
| .....AAGCUCAGUUUACACCU.....            | 7  |
| .....AAGCUCAGUUUACACCUUGU.....         | 3  |
| .....AGCUCAGUUUACACCU.....             | 2  |
| .....GCUCAGUUUACACCUUGUC.....          | 2  |
| .....UUACACCUUGUCCGACG.....            | 3  |
| .....UACACCUUGUCCGACGGUGU.....         | 2  |
| .....ACCUUGUCCGACGGUGUAAACUGAGCU.....  | 3  |
| .....CUUGUCCGACGGUGUAAACUG.....        | 3  |
| .....UUGUCCGACGGUGUAAACUG.....         | 3  |
| .....UUGUCCGACGGUGUAAACUGAGCUUG.....   | 2  |
| .....UUGUCCGACGGUGUAAACUGAGCUUGC.....  | 4  |
| .....UGUCCGACGGUGUAAACUGAGCUUG.....    | 2  |
| .....GUCCGACGGUGUAAACUGAGC.....        | 2  |
| .....GUCCGACGGUGUAAACUGAGCUUG.....     | 5  |
| .....GUCCGACGGUGUAAACUGAGCUUGC.....    | 2  |
| .....GUCCGACGGUGUAAACUGAGCUUGCUC.....  | 3  |
| .....GUCCGACGGUGUAAACUGAGCUUGCUCU..... | 4  |
| .....UCCGACGGUGUAAACUGAGCUUGCUC.....   | 3  |
| .....UCCGACGGUGUAAACUGAGCUUGCUCUU..... | 2  |
| .....CCGACGGUGUAAACUG.....             | 12 |
| .....CCGACGGUGUAAACUGA.....            | 14 |
| .....CCGACGGUGUAAACUGAG.....           | 32 |
| .....CCGACGGUGUAAACUGAGCUU.....        | 2  |
| .....CCGACGGUGUAAACUGAGCUUGCUCUU.....  | 6  |
| .....CCGACGGUGUAAACUGAGCUUGCUCUUU..... | 11 |
| .....CGACGGUGUAAACUGA.....             | 3  |
| .....CGACGGUGUAAACUGAG.....            | 8  |
| .....CGACGGUGUAAACUGAGCUUGC.....       | 5  |
| .....CGACGGUGUAAACUGAGCUUGCUC.....     | 4  |
| .....CGACGGUGUAAACUGAGCUUGCUCU.....    | 5  |
| .....CGACGGUGUAAACUGAGCUUGCUCUU.....   | 5  |
| .....CGACGGUGUAAACUGAGCUUGCUCUUU.....  | 18 |
| .....GACGGUGUAAACUGAGCU.....           | 3  |
| .....GACGGUGUAAACUGAGCUUGC.....        | 6  |
| .....GACGGUGUAAACUGAGCUUGCUCU.....     | 7  |
| .....GACGGUGUAAACUGAGCUUGCUCUU.....    | 12 |
| .....GACGGUGUAAACUGAGCUUGCUCUUU.....   | 35 |
| .....GACGGUGUAAACUGAGCUUGCUCUUUU.....  | 3  |
| .....GACGGUGUAAACUGAGCUUGCUCUUUUU..... | 2  |
| .....ACGGUGUAAACUGAGCUUG.....          | 4  |
| .....ACGGUGUAAACUGAGCUUGC.....         | 6  |
| .....ACGGUGUAAACUGAGCUUGCUC.....       | 2  |
| .....ACGGUGUAAACUGAGCUUGCUCU.....      | 10 |
| .....ACGGUGUAAACUGAGCUUGCUCUU.....     | 13 |

|                                  |      |
|----------------------------------|------|
| .....ACGGUGUAAACUGAGCUUGCUCUU... | 35   |
| .....ACGGUGUAAACUGAGCUUGCUCUUU.. | 36   |
| .....ACGGUGUAAACUGAGCUUGCUCUUUU. | 4    |
| .....CGGUGUAAACUGAGCUUG.....     | 2    |
| .....CGGUGUAAACUGAGCUUGC.....    | 3    |
| .....CGGUGUAAACUGAGCUUGCUC.....  | 2    |
| .....CGGUGUAAACUGAGCUUGCUCU....  | 10   |
| .....CGGUGUAAACUGAGCUUGCUCUU...  | 14   |
| .....CGGUGUAAACUGAGCUUGCUCUUU..  | 10   |
| .....CGGUGUAAACUGAGCUUGCUCUUUU.  | 2    |
| .....GGUGUAAACUGAGCUUGCUCU....   | 4    |
| .....GGUGUAAACUGAGCUUGCUCUU...   | 25   |
| .....GGUGUAAACUGAGCUUGCUCUUU..   | 19   |
| .....GGUGUAAACUGAGCUUGCUCUUUU.   | 2    |
| .....GUGUAAACUGAGCUUGC.....      | 2    |
| .....GUGUAAACUGAGCUUGCUC.....    | 9    |
| .....GUGUAAACUGAGCUUGCUCU....    | 5    |
| .....GUGUAAACUGAGCUUGCUCUU...    | 47   |
| .....GUGUAAACUGAGCUUGCUCUUU..    | 237  |
| .....GUGUAAACUGAGCUUGCUCUUUU.    | 31   |
| .....GUGUAAACUGAGCUUGCUCUUUUU    | 3    |
| .....UGUAAACUGAGCUUGC.....       | 28   |
| .....UGUAAACUGAGCUUGC.....       | 43   |
| .....UGUAAACUGAGCUUGCUC.....     | 127  |
| .....UGUAAACUGAGCUUGCUCU....     | 118  |
| .....UGUAAACUGAGCUUGCUCUU...     | 576  |
| .....UGUAAACUGAGCUUGCUCUUU..     | 6576 |
| .....UGUAAACUGAGCUUGCUCUUUU.     | 925  |
| .....UGUAAACUGAGCUUGCUCUUUUU     | 49   |
| .....GUAAACUGAGCUUGCUC.....      | 3    |
| .....GUAAACUGAGCUUGCUCU....      | 6    |
| .....GUAAACUGAGCUUGCUCUU...      | 25   |
| .....GUAAACUGAGCUUGCUCUUU..      | 175  |
| .....GUAAACUGAGCUUGCUCUUUU.      | 28   |
| .....GUAAACUGAGCUUGCUCUUUUU      | 4    |
| .....UAAACUGAGCUUGCUCUU...       | 3    |
| .....UAAACUGAGCUUGCUCUUU..       | 38   |
| .....UAAACUGAGCUUGCUCUUUU.       | 5    |
| .....AAACUGAGCUUGCUCUU...        | 3    |
| .....AAACUGAGCUUGCUCUUU..        | 36   |
| .....AAACUGAGCUUGCUCUUUU.        | 10   |
| .....AACUGAGCUUGCUCUUU..         | 15   |
| .....ACUGAGCUUGCUCUUU..          | 13   |
| .....CUGAGCUUGCUCUUUU.           | 8    |
| .....CUGAGCUUGCUCUUUUU           | 3    |
| .....UGAGCUUGCUCUUUUU            | 3    |

#sh1005-CG

|                                                          | Reads |
|----------------------------------------------------------|-------|
| CGGAGCAAGCUCAGUUUACACCUUGUCCGACGGUGUAAACUGAGCUUGCUCUUUUU |       |
| CGGAGCAAGCUCAGUUU.....                                   | 3     |
| CGGAGCAAGCUCAGUUUAC.....                                 | 5     |
| CGGAGCAAGCUCAGUUUACA.....                                | 19    |
| CGGAGCAAGCUCAGUUUACAC.....                               | 40    |
| CGGAGCAAGCUCAGUUUACACC.....                              | 676   |
| CGGAGCAAGCUCAGUUUACACCU.....                             | 2     |
| .GGAGCAAGCUCAGUUU.....                                   | 13    |
| .GGAGCAAGCUCAGUUUA.....                                  | 22    |
| .GGAGCAAGCUCAGUUUAC.....                                 | 46    |
| .GGAGCAAGCUCAGUUUACA.....                                | 102   |
| .GGAGCAAGCUCAGUUUACAC.....                               | 364   |
| .GGAGCAAGCUCAGUUUACACC.....                              | 1994  |
| .GGAGCAAGCUCAGUUUACACCU.....                             | 579   |
| .GGAGCAAGCUCAGUUUACACCUU.....                            | 46    |
| .GGAGCAAGCUCAGUUUACACCUUG.....                           | 75    |
| .GGAGCAAGCUCAGUUUACACCUUGU.....                          | 4     |
| .GGAGCAAGCUCAGUUUACACCUUGUC.....                         | 3     |
| .GGAGCAAGCUCAGUUUACACCUUGUCC.....                        | 14    |
| .GGAGCAAGCUCAGUUUACACCUUGCCG.....                        | 6     |
| .GAGCAAGCUCAGUUUACAC.....                                | 12    |
| .GAGCAAGCUCAGUUUACACC.....                               | 77    |
| .GAGCAAGCUCAGUUUACACCU.....                              | 16    |
| .GAGCAAGCUCAGUUUACACCUU.....                             | 2     |
| .GAGCAAGCUCAGUUUACACCUUG.....                            | 2     |
| .AGCAAGCUCAGUUUACACC.....                                | 9     |
| .AGCAAGCUCAGUUUACACCU.....                               | 10    |
| .GCAAGCUCAGUUUACAC.....                                  | 4     |
| .GCAAGCUCAGUUUACACC.....                                 | 50    |
| .CAAGCUCAGUUUACACC.....                                  | 9     |
| .CAAGCUCAGUUUACACCU.....                                 | 2     |
| .AAGCUCAGUUUACACC.....                                   | 12    |
| .AAGCUCAGUUUACACCU.....                                  | 10    |
| .AAGCUCAGUUUACACCUUG.....                                | 2     |
| .AGCUCAGUUUACACCUUG.....                                 | 2     |
| .UCAGUUUACACCUUGUCCGACGG.....                            | 2     |
| .CACCUUGUCCGACGGUGUA.....                                | 3     |
| .ACCUUGUCCGACGGUGUAAA.....                               | 2     |
| .ACCUUGUCCGACGGUGUAAACU.....                             | 3     |
| .CCUUGUCCGACGGUGUAAACUG.....                             | 2     |
| .CUUGUCCGACGGUGUAAACUGAGCUU.....                         | 4     |
| .CUUGUCCGACGGUGUAAACUGAGCUUGC.....                       | 2     |
| .UUGUCCGACGGUGUAAACUG.....                               | 3     |
| .UUGUCCGACGGUGUAAACUGAGCUU.....                          | 2     |
| .UUGUCCGACGGUGUAAACUGAGCUUG.....                         | 2     |
| .UGUCCGACGGUGUAAAC.....                                  | 3     |

|                                       |    |
|---------------------------------------|----|
| .....GUCCGACGGUGUAAACUGAGC.....       | 3  |
| .....UCCGACGGUGUAAACUG.....           | 3  |
| .....UCCGACGGUGUAAACUGAGCUUGC.....    | 2  |
| .....UCCGACGGUGUAAACUGAGCUUGC.....    | 5  |
| .....UCCGACGGUGUAAACUGAGCUUGCUCU..... | 8  |
| .....CCGACGGUGUAAACUG.....            | 10 |
| .....CCGACGGUGUAAACUGA.....           | 13 |
| .....CCGACGGUGUAAACUGAG.....          | 28 |
| .....CCGACGGUGUAAACUGAGCUUGC.....     | 4  |
| .....CCGACGGUGUAAACUGAGCUUGCUCU.....  | 14 |
| .....CCGACGGUGUAAACUGAGCUUGCUCUU..... | 10 |
| .....CGACGGUGUAAACUGA.....            | 6  |
| .....CGACGGUGUAAACUGAG.....           | 10 |
| .....CGACGGUGUAAACUGAGCUUGC.....      | 3  |
| .....CGACGGUGUAAACUGAGCUUGC.....      | 6  |
| .....CGACGGUGUAAACUGAGCUUGCUCU.....   | 2  |
| .....CGACGGUGUAAACUGAGCUUGCUCU.....   | 13 |
| .....CGACGGUGUAAACUGAGCUUGCUCUU.....  | 20 |
| .....CGACGGUGUAAACUGAGCUUGCUCUUU..... | 15 |
| .....GACGGUGUAAACUGAGC.....           | 3  |
| .....GACGGUGUAAACUGAGCUUGC.....       | 2  |
| .....GACGGUGUAAACUGAGCUUGCUCU.....    | 4  |
| .....GACGGUGUAAACUGAGCUUGCUCUU.....   | 19 |
| .....GACGGUGUAAACUGAGCUUGCUCUU.....   | 25 |
| .....GACGGUGUAAACUGAGCUUGCUCUUU.....  | 32 |
| .....GACGGUGUAAACUGAGCUUGCUCUUUU..... | 2  |
| .....ACGGUGUAAACUGAGCUUGC.....        | 7  |
| .....ACGGUGUAAACUGAGCUUGC.....        | 6  |
| .....ACGGUGUAAACUGAGCUUGC.....        | 13 |
| .....ACGGUGUAAACUGAGCUUGCUCU.....     | 29 |
| .....ACGGUGUAAACUGAGCUUGCUCU.....     | 97 |
| .....ACGGUGUAAACUGAGCUUGCUCUU.....    | 59 |
| .....ACGGUGUAAACUGAGCUUGCUCUUU.....   | 36 |
| .....CGGUGUAAACUGAGCUUGC.....         | 8  |
| .....CGGUGUAAACUGAGCUUGCUCU.....      | 7  |
| .....CGGUGUAAACUGAGCUUGCUCU.....      | 15 |
| .....CGGUGUAAACUGAGCUUGCUCUU.....     | 5  |
| .....CGGUGUAAACUGAGCUUGCUCUUU.....    | 9  |
| .....CGGUGUAAACUGAGCUUGCUCUUUU.....   | 3  |
| .....GGUGUAAACUGAGCUUGC.....          | 3  |
| .....GGUGUAAACUGAGCUUGC.....          | 2  |
| .....GGUGUAAACUGAGCUUGCUCU.....       | 22 |
| .....GGUGUAAACUGAGCUUGCUCUU.....      | 3  |
| .....GGUGUAAACUGAGCUUGCUCUUU.....     | 3  |
| .....GUGUAAACUGAGCUUGC.....           | 2  |
| .....GUGUAAACUGAGCUUGCUCU.....        | 3  |
| .....GUGUAAACUGAGCUUGCUCUU.....       | 13 |

|                               |      |
|-------------------------------|------|
| .....GUGUAAACUGAGCUUGCUCUUU.. | 11   |
| .....GUGUAAACUGAGCUUGCUCUUUU. | 19   |
| .....UGUAAACUGAGCUUGC.....    | 36   |
| .....UGUAAACUGAGCUUGC.....    | 40   |
| .....UGUAAACUGAGCUUGCUC.....  | 139  |
| .....UGUAAACUGAGCUUGCUCU..... | 88   |
| .....UGUAAACUGAGCUUGCUCUU..   | 393  |
| .....UGUAAACUGAGCUUGCUCUUU..  | 2694 |
| .....UGUAAACUGAGCUUGCUCUUUU.  | 4198 |
| .....UGUAAACUGAGCUUGCUCUUUUU  | 277  |
| .....GUAAACUGAGCUUGC.....     | 2    |
| .....GUAAACUGAGCUUGCUC.....   | 9    |
| .....GUAAACUGAGCUUGCUCU.....  | 13   |
| .....GUAAACUGAGCUUGCUCUU..    | 25   |
| .....GUAAACUGAGCUUGCUCUUU..   | 68   |
| .....GUAAACUGAGCUUGCUCUUUU.   | 122  |
| .....GUAAACUGAGCUUGCUCUUUUU   | 11   |
| .....UAAACUGAGCUUGCUCU.....   | 2    |
| .....UAAACUGAGCUUGCUCUU..     | 2    |
| .....UAAACUGAGCUUGCUCUUU..    | 21   |
| .....UAAACUGAGCUUGCUCUUUU.    | 16   |
| .....AAACUGAGCUUGCUCU.....    | 4    |
| .....AAACUGAGCUUGCUCUU..      | 6    |
| .....AAACUGAGCUUGCUCUUU..     | 12   |
| .....AAACUGAGCUUGCUCUUUU.     | 24   |
| .....AACUGAGCUUGCUCUU..       | 2    |
| .....AACUGAGCUUGCUCUUU..      | 11   |
| .....AACUGAGCUUGCUCUUUU.      | 13   |
| .....ACUGAGCUUGCUCUUU..       | 2    |
| .....ACUGAGCUUGCUCUUUU.       | 10   |
| .....CUGAGCUUGCUCUUUU.        | 19   |
| .....UGAGCUUGCUCUUUUU         | 2    |

**#sh1005-CC**

|                                                          | Reads |
|----------------------------------------------------------|-------|
| CCGAGCAAGCUCAGUUUACACCUUGUCCGACGGUGUAAACUGAGCUUGCUCUUUUU |       |
| CCGAGCAAGCUCAGUU.....                                    | 3     |
| CCGAGCAAGCUCAGUUUAC.....                                 | 6     |
| CCGAGCAAGCUCAGUUUACA.....                                | 35    |
| CCGAGCAAGCUCAGUUUACAC.....                               | 68    |
| CCGAGCAAGCUCAGUUUACACC.....                              | 669   |
| CCGAGCAAGCUCAGUUUACACCU.....                             | 6     |
| .CGAGCAAGCUCAGUUUAC.....                                 | 5     |
| .CGAGCAAGCUCAGUUUACA.....                                | 14    |
| .CGAGCAAGCUCAGUUUACAC.....                               | 54    |
| .CGAGCAAGCUCAGUUUACACC.....                              | 386   |
| .CGAGCAAGCUCAGUUUACACCU.....                             | 51    |
| .CGAGCAAGCUCAGUUUACACCUU.....                            | 6     |



|                                                 |      |
|-------------------------------------------------|------|
| .CGAGCAAGCUCAGUUUACACCUUG . . . . .             | 2    |
| .CGAGCAAGCUCAGUUUACACCUUGUCC . . . . .          | 4    |
| . .GAGCAAGCUCAGUUUA . . . . .                   | 2    |
| . .GAGCAAGCUCAGUUUAC . . . . .                  | 29   |
| . .GAGCAAGCUCAGUUUACA . . . . .                 | 38   |
| . .GAGCAAGCUCAGUUUACAC . . . . .                | 203  |
| . .GAGCAAGCUCAGUUUACACC . . . . .               | 1594 |
| . .GAGCAAGCUCAGUUUACACCU . . . . .              | 397  |
| . .GAGCAAGCUCAGUUUACACCUU . . . . .             | 40   |
| . .GAGCAAGCUCAGUUUACACCUUG . . . . .            | 65   |
| . .GAGCAAGCUCAGUUUACACCUUGU . . . . .           | 10   |
| . .GAGCAAGCUCAGUUUACACCUUGUC . . . . .          | 9    |
| . .GAGCAAGCUCAGUUUACACCUUGUCC . . . . .         | 23   |
| . .GAGCAAGCUCAGUUUACACCUUGUCCG . . . . .        | 8    |
| . . .AGCAAGCUCAGUUUACAC . . . . .               | 3    |
| . . .AGCAAGCUCAGUUUACACC . . . . .              | 24   |
| . . .AGCAAGCUCAGUUUACACCU . . . . .             | 6    |
| . . . .GCAAGCUCAGUUUACAC . . . . .              | 7    |
| . . . .GCAAGCUCAGUUUACACC . . . . .             | 103  |
| . . . .GCAAGCUCAGUUUACACCU . . . . .            | 27   |
| . . . .GCAAGCUCAGUUUACACCUU . . . . .           | 5    |
| . . . .GCAAGCUCAGUUUACACCUUGU . . . . .         | 3    |
| . . . .GCAAGCUCAGUUUACACCUUGUC . . . . .        | 2    |
| . . . . .CAAGCUCAGUUUACACC . . . . .            | 17   |
| . . . . .AAGCUCAGUUUACACC . . . . .             | 16   |
| . . . . .AAGCUCAGUUUACACCU . . . . .            | 11   |
| . . . . .AAGCUCAGUUUACACCUU . . . . .           | 3    |
| . . . . .AGCUCAGUUUACACCU . . . . .             | 4    |
| . . . . .AGCUCAGUUUACACCUUGU . . . . .          | 6    |
| . . . . .CUCAGUUUACACCUUGUCC . . . . .          | 2    |
| . . . . .UCAGUUUACACCUUGUCCGAC . . . . .        | 2    |
| . . . . .CAGUUUACACCUUGUCCGACGG . . . . .       | 2    |
| . . . . .GUUUACACCUUGUCCGACGG . . . . .         | 3    |
| . . . . .UACACCUUGUCCGACGGUGU . . . . .         | 6    |
| . . . . .UUGUCCGACGGUGUAAA . . . . .            | 2    |
| . . . . .UUGUCCGACGGUGUAAACUG . . . . .         | 3    |
| . . . . .UUGUCCGACGGUGUAAACUGAGCUUGC . . . . .  | 4    |
| . . . . .UGUCCGACGGUGUAAACU . . . . .           | 3    |
| . . . . .GUCCGACGGUGUAAACUGAGCUUGCUCU . . . . . | 2    |
| . . . . .UCCGACGGUGUAAACUG . . . . .            | 2    |
| . . . . .UCCGACGGUGUAAACUGAGCUUGC . . . . .     | 3    |
| . . . . .UCCGACGGUGUAAACUGAGCUUGCUC . . . . .   | 2    |
| . . . . .UCCGACGGUGUAAACUGAGCUUGCUCU . . . . .  | 2    |
| . . . . .UCCGACGGUGUAAACUGAGCUUGCUCUU . . . . . | 12   |
| . . . . .CCGACGGUGUAAACUG . . . . .             | 8    |
| . . . . .CCGACGGUGUAAACUGA . . . . .            | 12   |
| . . . . .CCGACGGUGUAAACUGAG . . . . .           | 27   |

|                                     |      |
|-------------------------------------|------|
| .....CCGACGGUGUAAACUGAGCUUGCUCU.... | 8    |
| .....CCGACGGUGUAAACUGAGCUUGCUCUU... | 20   |
| .....CCGACGGUGUAAACUGAGCUUGCUCUUU.. | 2    |
| .....CGACGGUGUAAACUGA.....          | 4    |
| .....CGACGGUGUAAACUGAG.....         | 13   |
| .....CGACGGUGUAAACUGAGCUUGCUCU....  | 8    |
| .....CGACGGUGUAAACUGAGCUUGCUCUU...  | 12   |
| .....CGACGGUGUAAACUGAGCUUGCUCUUU..  | 10   |
| .....CGACGGUGUAAACUGAGCUUGCUCUUUU.. | 2    |
| .....GACGGUGUAAACUGAGCUUGC.....     | 13   |
| .....GACGGUGUAAACUGAGCUUGCUCU....   | 18   |
| .....GACGGUGUAAACUGAGCUUGCUCUU...   | 48   |
| .....GACGGUGUAAACUGAGCUUGCUCUUU..   | 20   |
| .....ACGGUGUAAACUGAGCUUGC.....      | 8    |
| .....ACGGUGUAAACUGAGCUUGC.....      | 3    |
| .....ACGGUGUAAACUGAGCUUGCUC....     | 16   |
| .....ACGGUGUAAACUGAGCUUGCUCU....    | 27   |
| .....ACGGUGUAAACUGAGCUUGCUCUU...    | 76   |
| .....ACGGUGUAAACUGAGCUUGCUCUUU..    | 14   |
| .....CGGUGUAAACUGAGCUUGCUC.....     | 2    |
| .....CGGUGUAAACUGAGCUUGCUCU....     | 15   |
| .....CGGUGUAAACUGAGCUUGCUCUU...     | 13   |
| .....CGGUGUAAACUGAGCUUGCUCUUU..     | 3    |
| .....GGUGUAAACUGAGCUUGCUCU....      | 17   |
| .....GGUGUAAACUGAGCUUGCUCUU...      | 15   |
| .....GGUGUAAACUGAGCUUGCUCUUU..      | 10   |
| .....GGUGUAAACUGAGCUUGCUCUUUU..     | 2    |
| .....GUGUAAACUGAGCUUGCUC.....       | 3    |
| .....GUGUAAACUGAGCUUGCUCU....       | 10   |
| .....GUGUAAACUGAGCUUGCUCUU...       | 49   |
| .....GUGUAAACUGAGCUUGCUCUUU..       | 35   |
| .....GUGUAAACUGAGCUUGCUCUUUU..      | 3    |
| .....UGUAAACUGAGCUUGC.....          | 15   |
| .....UGUAAACUGAGCUUGC.....          | 50   |
| .....UGUAAACUGAGCUUGCUC....         | 97   |
| .....UGUAAACUGAGCUUGCUCU....        | 160  |
| .....UGUAAACUGAGCUUGCUCUU...        | 1135 |
| .....UGUAAACUGAGCUUGCUCUUU..        | 3888 |
| .....UGUAAACUGAGCUUGCUCUUUU..       | 413  |
| .....UGUAAACUGAGCUUGCUCUUUUU..      | 22   |
| .....GUAAACUGAGCUUGCUC.....         | 5    |
| .....GUAAACUGAGCUUGCUCU....         | 25   |
| .....GUAAACUGAGCUUGCUCUU...         | 41   |
| .....GUAAACUGAGCUUGCUCUUU..         | 105  |
| .....GUAAACUGAGCUUGCUCUUUU..        | 17   |
| .....UAAACUGAGCUUGCUCU....          | 6    |
| .....UAAACUGAGCUUGCUCUU...          | 12   |

|                            |    |
|----------------------------|----|
| .....UAAACUGAGCUUGCUCUUU.. | 26 |
| .....UAAACUGAGCUUGCUCUUUU. | 3  |
| .....AAACUGAGCUUGCUCU....  | 7  |
| .....AAACUGAGCUUGCUCUU..   | 9  |
| .....AAACUGAGCUUGCUCUUU..  | 21 |
| .....AACUGAGCUUGCUCUU....  | 6  |
| .....AACUGAGCUUGCUCUUU..   | 10 |
| .....AACUGAGCUUGCUCUUUU.   | 3  |
| .....ACUGAGCUUGCUCUUU..    | 9  |
| .....CUGAGCUUGCUCUUUU.     | 2  |

**#shR-nccr5-GG**

| uuguggGAGCAAGCUCAGUUUACACCUUguccgacggUGUAAACUGAGCUUGCUCUUuu | Reads |
|-------------------------------------------------------------|-------|
| ... UGGGAGCAAGCUCAGUUUACACC.....                            | 4     |
| ... GGGAGCAAGCUCAGUU.....                                   | 127   |
| ... GGGAGCAAGCUCAGUUU.....                                  | 74    |
| ... GGGAGCAAGCUCAGUUUA.....                                 | 249   |
| ... GGGAGCAAGCUCAGUUUAC.....                                | 194   |
| ... GGGAGCAAGCUCAGUUUACA.....                               | 404   |
| ... GGGAGCAAGCUCAGUUUACAC.....                              | 1193  |
| ... GGGAGCAAGCUCAGUUUACACC.....                             | 10136 |
| ... GGGAGCAAGCUCAGUUUACACCU.....                            | 1810  |
| ... GGGAGCAAGCUCAGUUUACACCUU.....                           | 262   |
| ... GGGAGCAAGCUCAGUUUACACCUUG.....                          | 628   |
| ... GGGAGCAAGCUCAGUUUACACCUUGU.....                         | 101   |
| ... GGGAGCAAGCUCAGUUUACACCUUGUC.....                        | 57    |
| ... GGGAGCAAGCUCAGUUUACACCUUGUCC.....                       | 36    |
| ... GGAGCAAGCUCAGUUU.....                                   | 39    |
| ... GGAGCAAGCUCAGUUUA.....                                  | 105   |
| ... GGAGCAAGCUCAGUUUAC.....                                 | 115   |
| ... GGAGCAAGCUCAGUUUACA.....                                | 160   |
| ... GGAGCAAGCUCAGUUUACAC.....                               | 322   |
| ... GGAGCAAGCUCAGUUUACACC.....                              | 1184  |
| ... GGAGCAAGCUCAGUUUACACCU.....                             | 1596  |
| ... GGAGCAAGCUCAGUUUACACCUU.....                            | 204   |
| ... GGAGCAAGCUCAGUUUACACCUUG.....                           | 558   |
| ... GGAGCAAGCUCAGUUUACACCUUGU.....                          | 72    |
| ... GGAGCAAGCUCAGUUUACACCUUGUC.....                         | 44    |
| ... GGAGCAAGCUCAGUUUACACCUUGUCC.....                        | 54    |
| ... GGAGCAAGCUCAGUUUACACCUUGUCCG.....                       | 5     |
| ... GAGCAAGCUCAGUUUA.....                                   | 208   |
| ... GAGCAAGCUCAGUUUAC.....                                  | 197   |
| ... GAGCAAGCUCAGUUUACA.....                                 | 230   |
| ... GAGCAAGCUCAGUUUACAC.....                                | 484   |
| ... GAGCAAGCUCAGUUUACACC.....                               | 1491  |
| ... GAGCAAGCUCAGUUUACACCU.....                              | 1329  |
| ... GAGCAAGCUCAGUUUACACCUU.....                             | 274   |

|                                        |     |
|----------------------------------------|-----|
| .....GAGCAAGCUCAGUUUACACCUUG.....      | 870 |
| .....GAGCAAGCUCAGUUUACACCUUGU.....     | 131 |
| .....GAGCAAGCUCAGUUUACACCUUGUC.....    | 94  |
| .....GAGCAAGCUCAGUUUACACCUUGUCC.....   | 189 |
| .....GAGCAAGCUCAGUUUACACCUUGUCCG.....  | 51  |
| .....AGCAAGCUCAGUUUAC.....             | 95  |
| .....AGCAAGCUCAGUUUACA.....            | 146 |
| .....AGCAAGCUCAGUUUACAC.....           | 250 |
| .....AGCAAGCUCAGUUUACACC.....          | 378 |
| .....AGCAAGCUCAGUUUACACCU.....         | 817 |
| .....AGCAAGCUCAGUUUACACCUU.....        | 141 |
| .....AGCAAGCUCAGUUUACACCUUG.....       | 338 |
| .....AGCAAGCUCAGUUUACACCUUGU.....      | 125 |
| .....AGCAAGCUCAGUUUACACCUUGUC.....     | 90  |
| .....AGCAAGCUCAGUUUACACCUUGUCC.....    | 203 |
| .....AGCAAGCUCAGUUUACACCUUGUCCG.....   | 67  |
| .....AGCAAGCUCAGUUUACACCUUGUCCGA.....  | 51  |
| .....AGCAAGCUCAGUUUACACCUUGUCCGAC..... | 4   |
| .....GCAAGCUCAGUUUACA.....             | 26  |
| .....GCAAGCUCAGUUUACAC.....            | 26  |
| .....GCAAGCUCAGUUUACACC.....           | 127 |
| .....GCAAGCUCAGUUUACACCU.....          | 66  |
| .....GCAAGCUCAGUUUACACCUU.....         | 8   |
| .....GCAAGCUCAGUUUACACCUUG.....        | 51  |
| .....GCAAGCUCAGUUUACACCUUGU.....       | 17  |
| .....GCAAGCUCAGUUUACACCUUGUC.....      | 3   |
| .....GCAAGCUCAGUUUACACCUUGUCC.....     | 7   |
| .....GCAAGCUCAGUUUACACCUUGUCCG.....    | 5   |
| .....GCAAGCUCAGUUUACACCUUGUCCGACG..... | 2   |
| .....CAAGCUCAGUUUACAC.....             | 63  |
| .....CAAGCUCAGUUUACACC.....            | 43  |
| .....CAAGCUCAGUUUACACCU.....           | 35  |
| .....CAAGCUCAGUUUACACCUU.....          | 8   |
| .....CAAGCUCAGUUUACACCUUG.....         | 19  |
| .....CAAGCUCAGUUUACACCUUGU.....        | 24  |
| .....CAAGCUCAGUUUACACCUUGUC.....       | 4   |
| .....CAAGCUCAGUUUACACCUUGUCC.....      | 5   |
| .....CAAGCUCAGUUUACACCUUGUCCG.....     | 6   |
| .....CAAGCUCAGUUUACACCUUGUCCGA.....    | 2   |
| .....CAAGCUCAGUUUACACCUUGUCCGAC.....   | 2   |
| .....CAAGCUCAGUUUACACCUUGUCCGACG.....  | 7   |
| .....CAAGCUCAGUUUACACCUUGUCCGACGG..... | 2   |
| .....AAGCUCAGUUUACACC.....             | 124 |
| .....AAGCUCAGUUUACACCU.....            | 80  |
| .....AAGCUCAGUUUACACCUU.....           | 26  |
| .....AAGCUCAGUUUACACCUUG.....          | 31  |
| .....AAGCUCAGUUUACACCUUGU.....         | 21  |

|                                        |     |
|----------------------------------------|-----|
| .....AAGCUCAGUUUACACCUUGUC.....        | 7   |
| .....AAGCUCAGUUUACACCUUGUCC.....       | 10  |
| .....AAGCUCAGUUUACACCUUGUCCG.....      | 5   |
| .....AAGCUCAGUUUACACCUUGUCCGA.....     | 2   |
| .....AAGCUCAGUUUACACCUUGUCCGAC.....    | 2   |
| .....AAGCUCAGUUUACACCUUGUCCGACG.....   | 9   |
| .....AAGCUCAGUUUACACCUUGUCCGACGG.....  | 2   |
| .....AGCUCAGUUUACACCU.....             | 107 |
| .....AGCUCAGUUUACACCUU.....            | 16  |
| .....AGCUCAGUUUACACCUUG.....           | 46  |
| .....AGCUCAGUUUACACCUUGU.....          | 44  |
| .....AGCUCAGUUUACACCUUGUC.....         | 8   |
| .....AGCUCAGUUUACACCUUGUCC.....        | 3   |
| .....AGCUCAGUUUACACCUUGUCCG.....       | 3   |
| .....AGCUCAGUUUACACCUUGUCCGAC.....     | 2   |
| .....AGCUCAGUUUACACCUUGUCCGACG.....    | 4   |
| .....AGCUCAGUUUACACCUUGUCCGACGG.....   | 5   |
| .....GCUCAGUUUACACCUU.....             | 7   |
| .....GCUCAGUUUACACCUUG.....            | 27  |
| .....GCUCAGUUUACACCUUGU.....           | 2   |
| .....GCUCAGUUUACACCUUGUCCG.....        | 5   |
| .....GCUCAGUUUACACCUUGUCCGAC.....      | 3   |
| .....GCUCAGUUUACACCUUGUCCGACG.....     | 4   |
| .....GCUCAGUUUACACCUUGUCCGACGG.....    | 3   |
| .....CUCAGUUUACACCUUG.....             | 76  |
| .....CUCAGUUUACACCUUGU.....            | 4   |
| .....CUCAGUUUACACCUUGUCC.....          | 5   |
| .....CUCAGUUUACACCUUGUCCG.....         | 11  |
| .....CUCAGUUUACACCUUGUCCGA.....        | 2   |
| .....CUCAGUUUACACCUUGUCCGAC.....       | 13  |
| .....CUCAGUUUACACCUUGUCCGACG.....      | 11  |
| .....CUCAGUUUACACCUUGUCCGACGG.....     | 9   |
| .....CUCAGUUUACACCUUGUCCGACGGU.....    | 3   |
| .....CUCAGUUUACACCUUGUCCGACGGUG.....   | 5   |
| .....CUCAGUUUACACCUUGUCCGACGGUGUA..... | 3   |
| .....UCAGUUUACACCUUGU.....             | 4   |
| .....UCAGUUUACACCUUGUCC.....           | 2   |
| .....UCAGUUUACACCUUGUCCG.....          | 3   |
| .....UCAGUUUACACCUUGUCCGAC.....        | 3   |
| .....UCAGUUUACACCUUGUCCGACG.....       | 5   |
| .....UCAGUUUACACCUUGUCCGACGG.....      | 12  |
| .....UCAGUUUACACCUUGUCCGACGGU.....     | 3   |
| .....UCAGUUUACACCUUGUCCGACGGUG.....    | 2   |
| .....UCAGUUUACACCUUGUCCGACGGUGU.....   | 4   |
| .....UCAGUUUACACCUUGUCCGACGGUGUA.....  | 2   |
| .....CAGUUUACACCUUGUCC.....            | 8   |
| .....CAGUUUACACCUUGUCCG.....           | 6   |

|                                        |    |
|----------------------------------------|----|
| .....CAGUUUACACCUUGUCCGA.....          | 4  |
| .....CAGUUUACACCUUGUCCGACG.....        | 18 |
| .....CAGUUUACACCUUGUCCGACGG.....       | 6  |
| .....CAGUUUACACCUUGUCCGACGGU.....      | 3  |
| .....CAGUUUACACCUUGUCCGACGGUG.....     | 7  |
| .....CAGUUUACACCUUGUCCGACGGUGU.....    | 5  |
| .....CAGUUUACACCUUGUCCGACGGUGUA.....   | 15 |
| .....CAGUUUACACCUUGUCCGACGGUGUAA.....  | 4  |
| .....CAGUUUACACCUUGUCCGACGGUGUAAA..... | 4  |
| .....AGUUUACACCUUGUCC.....             | 4  |
| .....AGUUUACACCUUGUCCG.....            | 3  |
| .....AGUUUACACCUUGUCCGAC.....          | 6  |
| .....AGUUUACACCUUGUCCGACG.....         | 2  |
| .....AGUUUACACCUUGUCCGACGG.....        | 5  |
| .....AGUUUACACCUUGUCCGACGGUG.....      | 6  |
| .....AGUUUACACCUUGUCCGACGGUGU.....     | 5  |
| .....AGUUUACACCUUGUCCGACGGUGUA.....    | 9  |
| .....AGUUUACACCUUGUCCGACGGUGUAA.....   | 3  |
| .....AGUUUACACCUUGUCCGACGGUGUAAA.....  | 4  |
| .....GUUUACACCUUGUCCG.....             | 5  |
| .....GUUUACACCUUGUCCGAC.....           | 5  |
| .....GUUUACACCUUGUCCGACG.....          | 3  |
| .....GUUUACACCUUGUCCGACGG.....         | 2  |
| .....GUUUACACCUUGUCCGACGGUG.....       | 6  |
| .....GUUUACACCUUGUCCGACGGUGU.....      | 7  |
| .....GUUUACACCUUGUCCGACGGUGUA.....     | 14 |
| .....GUUUACACCUUGUCCGACGGUGUAAA.....   | 9  |
| .....UUUACACCUUGUCCGA.....             | 2  |
| .....UUUACACCUUGUCCGAC.....            | 3  |
| .....UUUACACCUUGUCCGACG.....           | 7  |
| .....UUUACACCUUGUCCGACGG.....          | 16 |
| .....UUUACACCUUGUCCGACGGU.....         | 3  |
| .....UUUACACCUUGUCCGACGGUG.....        | 11 |
| .....UUUACACCUUGUCCGACGGUGU.....       | 6  |
| .....UUUACACCUUGUCCGACGGUGUA.....      | 12 |
| .....UUUACACCUUGUCCGACGGUGUAA.....     | 5  |
| .....UUUACACCUUGUCCGACGGUGUAAAC.....   | 6  |
| .....UUUACACCUUGUCCGACGGUGUAAACU.....  | 4  |
| .....UUACACCUUGUCCGAC.....             | 2  |
| .....UUACACCUUGUCCGACG.....            | 7  |
| .....UUACACCUUGUCCGACGG.....           | 11 |
| .....UUACACCUUGUCCGACGGU.....          | 4  |
| .....UUACACCUUGUCCGACGGUG.....         | 9  |
| .....UUACACCUUGUCCGACGGUGU.....        | 8  |
| .....UUACACCUUGUCCGACGGUGUA.....       | 3  |
| .....UUACACCUUGUCCGACGGUGUAAA.....     | 6  |
| .....UUACACCUUGUCCGACGGUGUAAAC.....    | 26 |

|                                       |    |
|---------------------------------------|----|
| .....UACACCUUGUCCGACG.....            | 10 |
| .....UACACCUUGUCCGACGG.....           | 24 |
| .....UACACCUUGUCCGACGGU.....          | 6  |
| .....UACACCUUGUCCGACGGUG.....         | 5  |
| .....UACACCUUGUCCGACGGUGU.....        | 24 |
| .....UACACCUUGUCCGACGGUGUAA.....      | 2  |
| .....UACACCUUGUCCGACGGUGUAAA.....     | 20 |
| .....UACACCUUGUCCGACGGUGUAAAC.....    | 4  |
| .....ACACCUUGUCCGACGG.....            | 17 |
| .....ACACCUUGUCCGACGGU.....           | 4  |
| .....ACACCUUGUCCGACGGUG.....          | 4  |
| .....ACACCUUGUCCGACGGUGUA.....        | 4  |
| .....ACACCUUGUCCGACGGUGUAA.....       | 4  |
| .....ACACCUUGUCCGACGGUGUAAA.....      | 2  |
| .....ACACCUUGUCCGACGGUGUAAAC.....     | 2  |
| .....ACACCUUGUCCGACGGUGUAAACUGA.....  | 2  |
| .....CACCUUGUCCGACGGU.....            | 40 |
| .....CACCUUGUCCGACGGUGU.....          | 9  |
| .....CACCUUGUCCGACGGUGUA.....         | 51 |
| .....CACCUUGUCCGACGGUGUAA.....        | 8  |
| .....CACCUUGUCCGACGGUGUAAA.....       | 36 |
| .....CACCUUGUCCGACGGUGUAAAC.....      | 32 |
| .....CACCUUGUCCGACGGUGUAAACU.....     | 6  |
| .....CACCUUGUCCGACGGUGUAAACUG.....    | 13 |
| .....CACCUUGUCCGACGGUGUAAACUGA.....   | 5  |
| .....CACCUUGUCCGACGGUGUAAACUGAG.....  | 8  |
| .....CACCUUGUCCGACGGUGUAAACUGAGC..... | 4  |
| .....ACCUUGUCCGACGGUG.....            | 51 |
| .....ACCUUGUCCGACGGUGU.....           | 45 |
| .....ACCUUGUCCGACGGUGUA.....          | 80 |
| .....ACCUUGUCCGACGGUGUAA.....         | 8  |
| .....ACCUUGUCCGACGGUGUAAA.....        | 92 |
| .....ACCUUGUCCGACGGUGUAAAC.....       | 32 |
| .....ACCUUGUCCGACGGUGUAAACU.....      | 16 |
| .....ACCUUGUCCGACGGUGUAAACUG.....     | 12 |
| .....ACCUUGUCCGACGGUGUAAACUGA.....    | 8  |
| .....ACCUUGUCCGACGGUGUAAACUGAG.....   | 13 |
| .....ACCUUGUCCGACGGUGUAAACUGAGC.....  | 9  |
| .....ACCUUGUCCGACGGUGUAAACUGAGCU..... | 12 |
| .....CCUUGUCCGACGGUGU.....            | 32 |
| .....CCUUGUCCGACGGUGUA.....           | 97 |
| .....CCUUGUCCGACGGUGUAA.....          | 15 |
| .....CCUUGUCCGACGGUGUAAA.....         | 95 |
| .....CCUUGUCCGACGGUGUAAAC.....        | 60 |
| .....CCUUGUCCGACGGUGUAAACU.....       | 18 |
| .....CCUUGUCCGACGGUGUAAACUG.....      | 45 |
| .....CCUUGUCCGACGGUGUAAACUGA.....     | 13 |

|                                        |     |
|----------------------------------------|-----|
| .....CCUUGUCCGACGGUGUAAACUGAG.....     | 42  |
| .....CCUUGUCCGACGGUGUAAACUGAGC.....    | 29  |
| .....CCUUGUCCGACGGUGUAAACUGAGCU.....   | 30  |
| .....CCUUGUCCGACGGUGUAAACUGAGCUU.....  | 27  |
| .....CCUUGUCCGACGGUGUAAACUGAGCUUG..... | 27  |
| .....CUUGUCCGACGGUGUA.....             | 73  |
| .....CUUGUCCGACGGUGUAA.....            | 13  |
| .....CUUGUCCGACGGUGUAAA.....           | 103 |
| .....CUUGUCCGACGGUGUAAAC.....          | 81  |
| .....CUUGUCCGACGGUGUAAACU.....         | 24  |
| .....CUUGUCCGACGGUGUAAACUG.....        | 64  |
| .....CUUGUCCGACGGUGUAAACUGA.....       | 35  |
| .....CUUGUCCGACGGUGUAAACUGAG.....      | 72  |
| .....CUUGUCCGACGGUGUAAACUGAGC.....     | 51  |
| .....CUUGUCCGACGGUGUAAACUGAGCU.....    | 63  |
| .....CUUGUCCGACGGUGUAAACUGAGCUU.....   | 60  |
| .....CUUGUCCGACGGUGUAAACUGAGCUUG.....  | 168 |
| .....CUUGUCCGACGGUGUAAACUGAGCUUGC..... | 39  |
| .....UUGUCCGACGGUGUAA.....             | 9   |
| .....UUGUCCGACGGUGUAAA.....            | 25  |
| .....UUGUCCGACGGUGUAAAC.....           | 20  |
| .....UUGUCCGACGGUGUAAACU.....          | 9   |
| .....UUGUCCGACGGUGUAAACUG.....         | 23  |
| .....UUGUCCGACGGUGUAAACUGA.....        | 19  |
| .....UUGUCCGACGGUGUAAACUGAG.....       | 23  |
| .....UUGUCCGACGGUGUAAACUGAGC.....      | 20  |
| .....UUGUCCGACGGUGUAAACUGAGCU.....     | 22  |
| .....UUGUCCGACGGUGUAAACUGAGCUU.....    | 17  |
| .....UUGUCCGACGGUGUAAACUGAGCUUG.....   | 62  |
| .....UUGUCCGACGGUGUAAACUGAGCUUGC.....  | 18  |
| .....UUGUCCGACGGUGUAAACUGAGCUUGC.....  | 6   |
| .....UGUCCGACGGUGUAAA.....             | 10  |
| .....UGUCCGACGGUGUAAAC.....            | 13  |
| .....UGUCCGACGGUGUAAACU.....           | 13  |
| .....UGUCCGACGGUGUAAACUG.....          | 12  |
| .....UGUCCGACGGUGUAAACUGA.....         | 19  |
| .....UGUCCGACGGUGUAAACUGAG.....        | 28  |
| .....UGUCCGACGGUGUAAACUGAGC.....       | 8   |
| .....UGUCCGACGGUGUAAACUGAGCU.....      | 15  |
| .....UGUCCGACGGUGUAAACUGAGCUU.....     | 22  |
| .....UGUCCGACGGUGUAAACUGAGCUUG.....    | 55  |
| .....UGUCCGACGGUGUAAACUGAGCUUGC.....   | 24  |
| .....UGUCCGACGGUGUAAACUGAGCUUGC.....   | 8   |
| .....UGUCCGACGGUGUAAACUGAGCUUGC.....   | 7   |
| .....GUCCGACGGUGUAAAC.....             | 3   |
| .....GUCCGACGGUGUAAACU.....            | 2   |
| .....GUCCGACGGUGUAAACUG.....           | 7   |



|                                        |     |
|----------------------------------------|-----|
| .....GUCCGACGGUGUAAACUGA.....          | 4   |
| .....GUCCGACGGUGUAAACUGAG.....         | 3   |
| .....GUCCGACGGUGUAAACUGAGC.....        | 4   |
| .....GUCCGACGGUGUAAACUGAGCU.....       | 10  |
| .....GUCCGACGGUGUAAACUGAGCUU.....      | 11  |
| .....GUCCGACGGUGUAAACUGAGCUUG.....     | 27  |
| .....GUCCGACGGUGUAAACUGAGCUUGC.....    | 5   |
| .....GUCCGACGGUGUAAACUGAGCUUGCUC.....  | 10  |
| .....GUCCGACGGUGUAAACUGAGCUUGCUC.....  | 5   |
| .....GUCCGACGGUGUAAACUGAGCUUGCUCU..... | 16  |
| .....UCCGACGGUGUAAACU.....             | 2   |
| .....UCCGACGGUGUAAACUG.....            | 4   |
| .....UCCGACGGUGUAAACUGA.....           | 2   |
| .....UCCGACGGUGUAAACUGAG.....          | 7   |
| .....UCCGACGGUGUAAACUGAGC.....         | 4   |
| .....UCCGACGGUGUAAACUGAGCUU.....       | 2   |
| .....UCCGACGGUGUAAACUGAGCUUG.....      | 3   |
| .....UCCGACGGUGUAAACUGAGCUUGCUC.....   | 2   |
| .....UCCGACGGUGUAAACUGAGCUUGCUC.....   | 10  |
| .....UCCGACGGUGUAAACUGAGCUUGCUCU.....  | 32  |
| .....UCCGACGGUGUAAACUGAGCUUGCUCUU..... | 15  |
| .....CCGACGGUGUAAACUG.....             | 13  |
| .....CCGACGGUGUAAACUGA.....            | 147 |
| .....CCGACGGUGUAAACUGAG.....           | 232 |
| .....CCGACGGUGUAAACUGAGC.....          | 6   |
| .....CCGACGGUGUAAACUGAGCU.....         | 3   |
| .....CCGACGGUGUAAACUGAGCUU.....        | 5   |
| .....CCGACGGUGUAAACUGAGCUUG.....       | 11  |
| .....CCGACGGUGUAAACUGAGCUUGC.....      | 8   |
| .....CCGACGGUGUAAACUGAGCUUGCUC.....    | 12  |
| .....CCGACGGUGUAAACUGAGCUUGCUC.....    | 40  |
| .....CCGACGGUGUAAACUGAGCUUGCUCU.....   | 234 |
| .....CCGACGGUGUAAACUGAGCUUGCUCUU.....  | 135 |
| .....CCGACGGUGUAAACUGAGCUUGCUCUUU..... | 34  |
| .....CGACGGUGUAAACUGA.....             | 44  |
| .....CGACGGUGUAAACUGAG.....            | 86  |
| .....CGACGGUGUAAACUGAGC.....           | 10  |
| .....CGACGGUGUAAACUGAGCU.....          | 9   |
| .....CGACGGUGUAAACUGAGCUU.....         | 10  |
| .....CGACGGUGUAAACUGAGCUUG.....        | 21  |
| .....CGACGGUGUAAACUGAGCUUGC.....       | 17  |
| .....CGACGGUGUAAACUGAGCUUGCUC.....     | 17  |
| .....CGACGGUGUAAACUGAGCUUGCUC.....     | 64  |
| .....CGACGGUGUAAACUGAGCUUGCUCU.....    | 374 |
| .....CGACGGUGUAAACUGAGCUUGCUCUU.....   | 350 |
| .....CGACGGUGUAAACUGAGCUUGCUCUUU.....  | 145 |
| .....CGACGGUGUAAACUGAGCUUGCUCUUUU..... | 81  |

|                                        |     |
|----------------------------------------|-----|
| .....GACGGUGUAAACUGAG.....             | 14  |
| .....GACGGUGUAAACUGAGC.....            | 14  |
| .....GACGGUGUAAACUGAGCU.....           | 13  |
| .....GACGGUGUAAACUGAGCUU.....          | 10  |
| .....GACGGUGUAAACUGAGCUUG.....         | 33  |
| .....GACGGUGUAAACUGAGCUUGC.....        | 29  |
| .....GACGGUGUAAACUGAGCUUGC.....        | 26  |
| .....GACGGUGUAAACUGAGCUUGCUC.....      | 101 |
| .....GACGGUGUAAACUGAGCUUGCUCU.....     | 457 |
| .....GACGGUGUAAACUGAGCUUGCUCUU.....    | 474 |
| .....GACGGUGUAAACUGAGCUUGCUCUUU.....   | 276 |
| .....GACGGUGUAAACUGAGCUUGCUCUUUU.....  | 222 |
| .....GACGGUGUAAACUGAGCUUGCUCUUUUU..... | 6   |
| .....ACGGUGUAAACUGAGC.....             | 5   |
| .....ACGGUGUAAACUGAGCU.....            | 21  |
| .....ACGGUGUAAACUGAGCUU.....           | 20  |
| .....ACGGUGUAAACUGAGCUUG.....          | 55  |
| .....ACGGUGUAAACUGAGCUUGC.....         | 41  |
| .....ACGGUGUAAACUGAGCUUGC.....         | 41  |
| .....ACGGUGUAAACUGAGCUUGCUC.....       | 132 |
| .....ACGGUGUAAACUGAGCUUGCUCU.....      | 429 |
| .....ACGGUGUAAACUGAGCUUGCUCUU.....     | 412 |
| .....ACGGUGUAAACUGAGCUUGCUCUUU.....    | 295 |
| .....ACGGUGUAAACUGAGCUUGCUCUUUU.....   | 228 |
| .....ACGGUGUAAACUGAGCUUGCUCUUUUU.....  | 11  |
| .....CGGUGUAAACUGAGCU.....             | 7   |
| .....CGGUGUAAACUGAGCUU.....            | 4   |
| .....CGGUGUAAACUGAGCUUG.....           | 14  |
| .....CGGUGUAAACUGAGCUUGC.....          | 16  |
| .....CGGUGUAAACUGAGCUUGC.....          | 24  |
| .....CGGUGUAAACUGAGCUUGCUC.....        | 108 |
| .....CGGUGUAAACUGAGCUUGCUCU.....       | 567 |
| .....CGGUGUAAACUGAGCUUGCUCUU.....      | 134 |
| .....CGGUGUAAACUGAGCUUGCUCUUU.....     | 81  |
| .....CGGUGUAAACUGAGCUUGCUCUUUU.....    | 83  |
| .....CGGUGUAAACUGAGCUUGCUCUUUUU.....   | 10  |
| .....GGUGUAAACUGAGCUU.....             | 5   |
| .....GGUGUAAACUGAGCUUG.....            | 11  |
| .....GGUGUAAACUGAGCUUGC.....           | 12  |
| .....GGUGUAAACUGAGCUUGC.....           | 11  |
| .....GGUGUAAACUGAGCUUGCUC.....         | 37  |
| .....GGUGUAAACUGAGCUUGCUCU.....        | 117 |
| .....GGUGUAAACUGAGCUUGCUCUU.....       | 153 |
| .....GGUGUAAACUGAGCUUGCUCUUU.....      | 375 |
| .....GGUGUAAACUGAGCUUGCUCUUUU.....     | 299 |
| .....GGUGUAAACUGAGCUUGCUCUUUUU.....    | 24  |
| .....GUGUAAACUGAGCUUG.....             | 46  |

|                                |       |
|--------------------------------|-------|
| .....GUGUAAACUGAGCUUGC.....    | 42    |
| .....GUGUAAACUGAGCUUGC.....    | 19    |
| .....GUGUAAACUGAGCUUGCUC.....  | 37    |
| .....GUGUAAACUGAGCUUGCUCU..... | 115   |
| .....GUGUAAACUGAGCUUGCUCUU...  | 134   |
| .....GUGUAAACUGAGCUUGCUCUUU..  | 160   |
| .....GUGUAAACUGAGCUUGCUCUUUU.  | 132   |
| .....GUGUAAACUGAGCUUGCUCUUUUU  | 5     |
| .....UGUAAACUGAGCUUGC.....     | 116   |
| .....UGUAAACUGAGCUUGC.....     | 114   |
| .....UGUAAACUGAGCUUGCUC.....   | 376   |
| .....UGUAAACUGAGCUUGCUCU.....  | 580   |
| .....UGUAAACUGAGCUUGCUCUU...   | 2583  |
| .....UGUAAACUGAGCUUGCUCUUU..   | 14475 |
| .....UGUAAACUGAGCUUGCUCUUUU.   | 14946 |
| .....UGUAAACUGAGCUUGCUCUUUUU   | 2053  |
| .....GUAAACUGAGCUUGC.....      | 25    |
| .....GUAAACUGAGCUUGCUC.....    | 152   |
| .....GUAAACUGAGCUUGCUCU.....   | 363   |
| .....GUAAACUGAGCUUGCUCUU...    | 257   |
| .....GUAAACUGAGCUUGCUCUUU..    | 546   |
| .....GUAAACUGAGCUUGCUCUUUU.    | 563   |
| .....GUAAACUGAGCUUGCUCUUUUU    | 131   |
| .....UAAACUGAGCUUGCUC.....     | 34    |
| .....UAAACUGAGCUUGCUCU.....    | 70    |
| .....UAAACUGAGCUUGCUCUU...     | 84    |
| .....UAAACUGAGCUUGCUCUUU..     | 142   |
| .....UAAACUGAGCUUGCUCUUUU.     | 129   |
| .....UAAACUGAGCUUGCUCUUUUU     | 32    |
| .....AAACUGAGCUUGCUCU.....     | 62    |
| .....AAACUGAGCUUGCUCUU...      | 56    |
| .....AAACUGAGCUUGCUCUUU..      | 154   |
| .....AAACUGAGCUUGCUCUUUU.      | 143   |
| .....AAACUGAGCUUGCUCUUUUU      | 18    |
| .....AACUGAGCUUGCUCUU.....     | 59    |
| .....AACUGAGCUUGCUCUUU..       | 128   |
| .....AACUGAGCUUGCUCUUUU.       | 139   |
| .....AACUGAGCUUGCUCUUUUU       | 11    |
| .....ACUGAGCUUGCUCUUU..        | 114   |
| .....ACUGAGCUUGCUCUUUU.        | 141   |
| .....ACUGAGCUUGCUCUUUUU        | 18    |
| .....CUGAGCUUGCUCUUUU.         | 279   |
| .....CUGAGCUUGCUCUUUUU         | 50    |
| .....UGAGCUUGCUCUUUUU          | 53    |

**#shR-nccr5-GGG**

uuggggGAGCAAGCUCAGUUUACACCUUguccgacggUGUAAACUGAGCUUGCUCUUuu

Reads

|                                       |      |
|---------------------------------------|------|
| ..GGGGAGCAAGCUCAGUUUAC.....           | 3    |
| ..GGGGAGCAAGCUCAGUUUACA.....          | 7    |
| ..GGGGAGCAAGCUCAGUUUACACC.....        | 12   |
| ..GGGGAGCAAGCUCAGUUUACACCU.....       | 2    |
| ..GGGGAGCAAGCUCAGU.....               | 3    |
| ..GGGGAGCAAGCUCAGUU.....              | 4    |
| ..GGGGAGCAAGCUCAGUUU.....             | 2    |
| ..GGGGAGCAAGCUCAGUUUA.....            | 10   |
| ..GGGGAGCAAGCUCAGUUUAC.....           | 22   |
| ..GGGGAGCAAGCUCAGUUUACA.....          | 71   |
| ..GGGGAGCAAGCUCAGUUUACAC.....         | 40   |
| ..GGGGAGCAAGCUCAGUUUACACC.....        | 143  |
| ..GGGGAGCAAGCUCAGUUUACACCU.....       | 29   |
| ..GGGGAGCAAGCUCAGUUUACACCUU.....      | 9    |
| ..GGGGAGCAAGCUCAGUUUACACCUUG.....     | 5    |
| ..GGGGAGCAAGCUCAGUUUACACCUUGU.....    | 2    |
| ...GGGAGCAAGCUCAGUU.....              | 60   |
| ...GGGAGCAAGCUCAGUUU.....             | 40   |
| ...GGGAGCAAGCUCAGUUUA.....            | 109  |
| ...GGGAGCAAGCUCAGUUUAC.....           | 69   |
| ...GGGAGCAAGCUCAGUUUACA.....          | 174  |
| ...GGGAGCAAGCUCAGUUUACAC.....         | 589  |
| ...GGGAGCAAGCUCAGUUUACACC.....        | 6522 |
| ...GGGAGCAAGCUCAGUUUACACCU.....       | 801  |
| ...GGGAGCAAGCUCAGUUUACACCUU.....      | 83   |
| ...GGGAGCAAGCUCAGUUUACACCUUG.....     | 300  |
| ...GGGAGCAAGCUCAGUUUACACCUUGU.....    | 41   |
| ...GGGAGCAAGCUCAGUUUACACCUUGUC.....   | 7    |
| ...GGGAGCAAGCUCAGUUUACACCUUGUCC.....  | 11   |
| ....GGAGCAAGCUCAGUUU.....             | 46   |
| ....GGAGCAAGCUCAGUUUA.....            | 111  |
| ....GGAGCAAGCUCAGUUUAC.....           | 126  |
| ....GGAGCAAGCUCAGUUUACA.....          | 196  |
| ....GGAGCAAGCUCAGUUUACAC.....         | 502  |
| ....GGAGCAAGCUCAGUUUACACC.....        | 1732 |
| ....GGAGCAAGCUCAGUUUACACCU.....       | 2145 |
| ....GGAGCAAGCUCAGUUUACACCUU.....      | 239  |
| ....GGAGCAAGCUCAGUUUACACCUUG.....     | 837  |
| ....GGAGCAAGCUCAGUUUACACCUUGU.....    | 91   |
| ....GGAGCAAGCUCAGUUUACACCUUGUC.....   | 33   |
| ....GGAGCAAGCUCAGUUUACACCUUGUCC.....  | 45   |
| ....GGAGCAAGCUCAGUUUACACCUUGUCCG..... | 6    |
| .....GAGCAAGCUCAGUUUA.....            | 383  |
| .....GAGCAAGCUCAGUUUAC.....           | 388  |
| .....GAGCAAGCUCAGUUUACA.....          | 481  |
| .....GAGCAAGCUCAGUUUACAC.....         | 1098 |
| .....GAGCAAGCUCAGUUUACACC.....        | 4569 |

|                                        |      |
|----------------------------------------|------|
| .....GAGCAAGCUCAGUUUACACCU.....        | 3784 |
| .....GAGCAAGCUCAGUUUACACCUU.....       | 718  |
| .....GAGCAAGCUCAGUUUACACCUUG.....      | 2600 |
| .....GAGCAAGCUCAGUUUACACCUUGU.....     | 279  |
| .....GAGCAAGCUCAGUUUACACCUUGUC.....    | 184  |
| .....GAGCAAGCUCAGUUUACACCUUGUCC.....   | 351  |
| .....GAGCAAGCUCAGUUUACACCUUGUCCG.....  | 83   |
| .....GAGCAAGCUCAGUUUACACCUUGUCCGA..... | 8    |
| .....AGCAAGCUCAGUUUAC.....             | 109  |
| .....AGCAAGCUCAGUUUACA.....            | 131  |
| .....AGCAAGCUCAGUUUACAC.....           | 237  |
| .....AGCAAGCUCAGUUUACACC.....          | 372  |
| .....AGCAAGCUCAGUUUACACCU.....         | 893  |
| .....AGCAAGCUCAGUUUACACCUU.....        | 132  |
| .....AGCAAGCUCAGUUUACACCUUG.....       | 478  |
| .....AGCAAGCUCAGUUUACACCUUGU.....      | 123  |
| .....AGCAAGCUCAGUUUACACCUUGUC.....     | 85   |
| .....AGCAAGCUCAGUUUACACCUUGUCC.....    | 155  |
| .....AGCAAGCUCAGUUUACACCUUGUCCG.....   | 42   |
| .....AGCAAGCUCAGUUUACACCUUGUCCGA.....  | 59   |
| .....AGCAAGCUCAGUUUACACCUUGUCCGAC..... | 5    |
| .....GCAAGCUCAGUUUACA.....             | 30   |
| .....GCAAGCUCAGUUUACAC.....            | 54   |
| .....GCAAGCUCAGUUUACACC.....           | 204  |
| .....GCAAGCUCAGUUUACACCU.....          | 145  |
| .....GCAAGCUCAGUUUACACCUU.....         | 22   |
| .....GCAAGCUCAGUUUACACCUUG.....        | 116  |
| .....GCAAGCUCAGUUUACACCUUGU.....       | 26   |
| .....GCAAGCUCAGUUUACACCUUGUC.....      | 5    |
| .....GCAAGCUCAGUUUACACCUUGUCC.....     | 14   |
| .....GCAAGCUCAGUUUACACCUUGUCCG.....    | 5    |
| .....GCAAGCUCAGUUUACACCUUGUCCGA.....   | 2    |
| .....GCAAGCUCAGUUUACACCUUGUCCGAC.....  | 6    |
| .....GCAAGCUCAGUUUACACCUUGUCCGACG..... | 2    |
| .....CAAGCUCAGUUUACAC.....             | 50   |
| .....CAAGCUCAGUUUACACC.....            | 42   |
| .....CAAGCUCAGUUUACACCU.....           | 33   |
| .....CAAGCUCAGUUUACACCUU.....          | 11   |
| .....CAAGCUCAGUUUACACCUUG.....         | 37   |
| .....CAAGCUCAGUUUACACCUUGU.....        | 16   |
| .....CAAGCUCAGUUUACACCUUGUC.....       | 8    |
| .....CAAGCUCAGUUUACACCUUGUCC.....      | 4    |
| .....CAAGCUCAGUUUACACCUUGUCCG.....     | 6    |
| .....CAAGCUCAGUUUACACCUUGUCCGAC.....   | 6    |
| .....CAAGCUCAGUUUACACCUUGUCCGACG.....  | 9    |
| .....AAGCUCAGUUUACACC.....             | 108  |
| .....AAGCUCAGUUUACACCU.....            | 69   |

|                                       |    |
|---------------------------------------|----|
| .....AAGCUCAGUUUACACCUU.....          | 20 |
| .....AAGCUCAGUUUACACCUUG.....         | 42 |
| .....AAGCUCAGUUUACACCUUGU.....        | 15 |
| .....AAGCUCAGUUUACACCUUGUC.....       | 6  |
| .....AAGCUCAGUUUACACCUUGUCC.....      | 3  |
| .....AAGCUCAGUUUACACCUUGUCCG.....     | 5  |
| .....AAGCUCAGUUUACACCUUGUCCGAC.....   | 8  |
| .....AAGCUCAGUUUACACCUUGUCCGACG.....  | 11 |
| .....AAGCUCAGUUUACACCUUGUCCGACGG..... | 7  |
| .....AGCUCAGUUUACACCU.....            | 84 |
| .....AGCUCAGUUUACACCUU.....           | 18 |
| .....AGCUCAGUUUACACCUUG.....          | 61 |
| .....AGCUCAGUUUACACCUUGU.....         | 31 |
| .....AGCUCAGUUUACACCUUGUC.....        | 6  |
| .....AGCUCAGUUUACACCUUGUCC.....       | 5  |
| .....AGCUCAGUUUACACCUUGUCCG.....      | 4  |
| .....AGCUCAGUUUACACCUUGUCCGA.....     | 2  |
| .....AGCUCAGUUUACACCUUGUCCGAC.....    | 3  |
| .....GCUCAGUUUACACCUU.....            | 11 |
| .....GCUCAGUUUACACCUUG.....           | 34 |
| .....GCUCAGUUUACACCUUGU.....          | 3  |
| .....GCUCAGUUUACACCUUGUC.....         | 2  |
| .....GCUCAGUUUACACCUUGUCC.....        | 2  |
| .....GCUCAGUUUACACCUUGUCCG.....       | 6  |
| .....GCUCAGUUUACACCUUGUCCGAC.....     | 6  |
| .....GCUCAGUUUACACCUUGUCCGACG.....    | 3  |
| .....GCUCAGUUUACACCUUGUCCGACGG.....   | 7  |
| .....GCUCAGUUUACACCUUGUCCGACGGUG..... | 4  |
| .....CUCAGUUUACACCUUG.....            | 87 |
| .....CUCAGUUUACACCUUGU.....           | 5  |
| .....CUCAGUUUACACCUUGUCC.....         | 4  |
| .....CUCAGUUUACACCUUGUCCG.....        | 9  |
| .....CUCAGUUUACACCUUGUCCGAC.....      | 3  |
| .....CUCAGUUUACACCUUGUCCGACG.....     | 16 |
| .....CUCAGUUUACACCUUGUCCGACGG.....    | 12 |
| .....CUCAGUUUACACCUUGUCCGACGGU.....   | 2  |
| .....CUCAGUUUACACCUUGUCCGACGGUG.....  | 5  |
| .....UCAGUUUACACCUUGUCC.....          | 5  |
| .....UCAGUUUACACCUUGUCCG.....         | 3  |
| .....UCAGUUUACACCUUGUCCGA.....        | 2  |
| .....UCAGUUUACACCUUGUCCGAC.....       | 3  |
| .....UCAGUUUACACCUUGUCCGACG.....      | 9  |
| .....UCAGUUUACACCUUGUCCGACGG.....     | 6  |
| .....UCAGUUUACACCUUGUCCGACGGU.....    | 2  |
| .....UCAGUUUACACCUUGUCCGACGGUG.....   | 3  |
| .....UCAGUUUACACCUUGUCCGACGGUGU.....  | 2  |
| .....CAGUUUACACCUUGUCC.....           | 2  |

|                                        |    |
|----------------------------------------|----|
| .....CAGUUUACACCUUGUCCG.....           | 9  |
| .....CAGUUUACACCUUGUCCGAC.....         | 10 |
| .....CAGUUUACACCUUGUCCGACG.....        | 11 |
| .....CAGUUUACACCUUGUCCGACGG.....       | 5  |
| .....CAGUUUACACCUUGUCCGACGGUG.....     | 3  |
| .....CAGUUUACACCUUGUCCGACGGUGU.....    | 6  |
| .....CAGUUUACACCUUGUCCGACGGUGUA.....   | 13 |
| .....CAGUUUACACCUUGUCCGACGGUGUAAA..... | 6  |
| .....AGUUUACACCUUGUCC.....             | 2  |
| .....AGUUUACACCUUGUCCG.....            | 3  |
| .....AGUUUACACCUUGUCCGAC.....          | 3  |
| .....AGUUUACACCUUGUCCGACG.....         | 5  |
| .....AGUUUACACCUUGUCCGACGGUG.....      | 4  |
| .....AGUUUACACCUUGUCCGACGGUGU.....     | 3  |
| .....AGUUUACACCUUGUCCGACGGUGUA.....    | 12 |
| .....AGUUUACACCUUGUCCGACGGUGUAA.....   | 2  |
| .....AGUUUACACCUUGUCCGACGGUGUAAA.....  | 6  |
| .....GUUUACACCUUGUCCGAC.....           | 2  |
| .....GUUUACACCUUGUCCGACG.....          | 3  |
| .....GUUUACACCUUGUCCGACGG.....         | 6  |
| .....GUUUACACCUUGUCCGACGGU.....        | 2  |
| .....GUUUACACCUUGUCCGACGGUG.....       | 6  |
| .....GUUUACACCUUGUCCGACGGUGU.....      | 6  |
| .....GUUUACACCUUGUCCGACGGUGUA.....     | 18 |
| .....GUUUACACCUUGUCCGACGGUGUAA.....    | 3  |
| .....GUUUACACCUUGUCCGACGGUGUAAA.....   | 6  |
| .....UUUACACCUUGUCCGACG.....           | 7  |
| .....UUUACACCUUGUCCGACGG.....          | 15 |
| .....UUUACACCUUGUCCGACGGU.....         | 3  |
| .....UUUACACCUUGUCCGACGGUG.....        | 18 |
| .....UUUACACCUUGUCCGACGGUGU.....       | 5  |
| .....UUUACACCUUGUCCGACGGUGUA.....      | 9  |
| .....UUUACACCUUGUCCGACGGUGUAA.....     | 2  |
| .....UUUACACCUUGUCCGACGGUGUAAAC.....   | 8  |
| .....UUUACACCUUGUCCGACGGUGUAAACU.....  | 2  |
| .....UUACACCUUGUCCGAC.....             | 2  |
| .....UUACACCUUGUCCGACG.....            | 5  |
| .....UUACACCUUGUCCGACGG.....           | 14 |
| .....UUACACCUUGUCCGACGGU.....          | 8  |
| .....UUACACCUUGUCCGACGGUG.....         | 5  |
| .....UUACACCUUGUCCGACGGUGU.....        | 9  |
| .....UUACACCUUGUCCGACGGUGUA.....       | 8  |
| .....UUACACCUUGUCCGACGGUGUAAA.....     | 5  |
| .....UUACACCUUGUCCGACGGUGUAAAC.....    | 30 |
| .....UACACCUUGUCCGACG.....             | 11 |
| .....UACACCUUGUCCGACGG.....            | 21 |
| .....UACACCUUGUCCGACGGU.....           | 5  |

|                                        |    |
|----------------------------------------|----|
| .....UACACCUUGUCCGACGGUG.....          | 7  |
| .....UACACCUUGUCCGACGGUGU.....         | 13 |
| .....UACACCUUGUCCGACGGUGUAAA.....      | 19 |
| .....UACACCUUGUCCGACGGUGUAAAC.....     | 6  |
| .....ACACCUUGUCCGACGG.....             | 24 |
| .....ACACCUUGUCCGACGGU.....            | 4  |
| .....ACACCUUGUCCGACGGUG.....           | 7  |
| .....ACACCUUGUCCGACGGUGUAA.....        | 4  |
| .....ACACCUUGUCCGACGGUGUAAA.....       | 2  |
| .....ACACCUUGUCCGACGGUGUAAAC.....      | 3  |
| .....ACACCUUGUCCGACGGUGUAAACU.....     | 2  |
| .....CACCUUGUCCGACGGU.....             | 40 |
| .....CACCUUGUCCGACGGUGU.....           | 15 |
| .....CACCUUGUCCGACGGUGUA.....          | 62 |
| .....CACCUUGUCCGACGGUGUAA.....         | 7  |
| .....CACCUUGUCCGACGGUGUAAA.....        | 38 |
| .....CACCUUGUCCGACGGUGUAAAC.....       | 52 |
| .....CACCUUGUCCGACGGUGUAAACU.....      | 5  |
| .....CACCUUGUCCGACGGUGUAAACUG.....     | 5  |
| .....CACCUUGUCCGACGGUGUAAACUGA.....    | 6  |
| .....CACCUUGUCCGACGGUGUAAACUGAG.....   | 6  |
| .....CACCUUGUCCGACGGUGUAAACUGAGC.....  | 2  |
| .....ACCUUGUCCGACGGUG.....             | 41 |
| .....ACCUUGUCCGACGGUGU.....            | 50 |
| .....ACCUUGUCCGACGGUGUA.....           | 62 |
| .....ACCUUGUCCGACGGUGUAA.....          | 10 |
| .....ACCUUGUCCGACGGUGUAAA.....         | 81 |
| .....ACCUUGUCCGACGGUGUAAAC.....        | 40 |
| .....ACCUUGUCCGACGGUGUAAACU.....       | 9  |
| .....ACCUUGUCCGACGGUGUAAACUG.....      | 14 |
| .....ACCUUGUCCGACGGUGUAAACUGA.....     | 15 |
| .....ACCUUGUCCGACGGUGUAAACUGAG.....    | 25 |
| .....ACCUUGUCCGACGGUGUAAACUGAGC.....   | 11 |
| .....ACCUUGUCCGACGGUGUAAACUGAGCU.....  | 6  |
| .....ACCUUGUCCGACGGUGUAAACUGAGCUU..... | 4  |
| .....CCUUGUCCGACGGUGU.....             | 21 |
| .....CCUUGUCCGACGGUGUA.....            | 98 |
| .....CCUUGUCCGACGGUGUAA.....           | 6  |
| .....CCUUGUCCGACGGUGUAAA.....          | 86 |
| .....CCUUGUCCGACGGUGUAAAC.....         | 43 |
| .....CCUUGUCCGACGGUGUAAACU.....        | 26 |
| .....CCUUGUCCGACGGUGUAAACUG.....       | 41 |
| .....CCUUGUCCGACGGUGUAAACUGA.....      | 14 |
| .....CCUUGUCCGACGGUGUAAACUGAG.....     | 39 |
| .....CCUUGUCCGACGGUGUAAACUGAGC.....    | 36 |
| .....CCUUGUCCGACGGUGUAAACUGAGCU.....   | 34 |
| .....CCUUGUCCGACGGUGUAAACUGAGCUU.....  | 29 |



|                                        |     |
|----------------------------------------|-----|
| .....CCUUGUCCGACGGUGUAAACUGAGCUUG..... | 33  |
| .....CUUGUCCGACGGUGUA.....             | 63  |
| .....CUUGUCCGACGGUGUAA.....            | 5   |
| .....CUUGUCCGACGGUGUAAA.....           | 125 |
| .....CUUGUCCGACGGUGUAAAC.....          | 75  |
| .....CUUGUCCGACGGUGUAAACU.....         | 26  |
| .....CUUGUCCGACGGUGUAAACUG.....        | 54  |
| .....CUUGUCCGACGGUGUAAACUGA.....       | 25  |
| .....CUUGUCCGACGGUGUAAACUGAG.....      | 89  |
| .....CUUGUCCGACGGUGUAAACUGAGC.....     | 49  |
| .....CUUGUCCGACGGUGUAAACUGAGCU.....    | 80  |
| .....CUUGUCCGACGGUGUAAACUGAGCUU.....   | 92  |
| .....CUUGUCCGACGGUGUAAACUGAGCUUG.....  | 178 |
| .....CUUGUCCGACGGUGUAAACUGAGCUUGC..... | 26  |
| .....UUGUCCGACGGUGUAA.....             | 5   |
| .....UUGUCCGACGGUGUAAA.....            | 26  |
| .....UUGUCCGACGGUGUAAAC.....           | 24  |
| .....UUGUCCGACGGUGUAAACU.....          | 9   |
| .....UUGUCCGACGGUGUAAACUG.....         | 21  |
| .....UUGUCCGACGGUGUAAACUGA.....        | 10  |
| .....UUGUCCGACGGUGUAAACUGAG.....       | 32  |
| .....UUGUCCGACGGUGUAAACUGAGC.....      | 22  |
| .....UUGUCCGACGGUGUAAACUGAGCU.....     | 24  |
| .....UUGUCCGACGGUGUAAACUGAGCUU.....    | 41  |
| .....UUGUCCGACGGUGUAAACUGAGCUUG.....   | 78  |
| .....UUGUCCGACGGUGUAAACUGAGCUUGC.....  | 32  |
| .....UUGUCCGACGGUGUAAACUGAGCUUGC.....  | 3   |
| .....UGUCCGACGGUGUAAA.....             | 10  |
| .....UGUCCGACGGUGUAAAC.....            | 13  |
| .....UGUCCGACGGUGUAAACU.....           | 7   |
| .....UGUCCGACGGUGUAAACUG.....          | 17  |
| .....UGUCCGACGGUGUAAACUGA.....         | 10  |
| .....UGUCCGACGGUGUAAACUGAG.....        | 31  |
| .....UGUCCGACGGUGUAAACUGAGC.....       | 21  |
| .....UGUCCGACGGUGUAAACUGAGCU.....      | 17  |
| .....UGUCCGACGGUGUAAACUGAGCUU.....     | 24  |
| .....UGUCCGACGGUGUAAACUGAGCUUG.....    | 59  |
| .....UGUCCGACGGUGUAAACUGAGCUUGC.....   | 26  |
| .....UGUCCGACGGUGUAAACUGAGCUUGC.....   | 13  |
| .....UGUCCGACGGUGUAAACUGAGCUUGCUC..... | 5   |
| .....GUCCGACGGUGUAAAC.....             | 3   |
| .....GUCCGACGGUGUAAACU.....            | 3   |
| .....GUCCGACGGUGUAAACUG.....           | 5   |
| .....GUCCGACGGUGUAAACUGAG.....         | 7   |
| .....GUCCGACGGUGUAAACUGAGC.....        | 3   |
| .....GUCCGACGGUGUAAACUGAGCU.....       | 9   |
| .....GUCCGACGGUGUAAACUGAGCUU.....      | 7   |

|                                        |     |
|----------------------------------------|-----|
| .....GUCCGACGGUGUAAACUGAGCUUG.....     | 19  |
| .....GUCCGACGGUGUAAACUGAGCUUGC.....    | 5   |
| .....GUCCGACGGUGUAAACUGAGCUUGCUC.....  | 3   |
| .....GUCCGACGGUGUAAACUGAGCUUGCUC.....  | 3   |
| .....GUCCGACGGUGUAAACUGAGCUUGCUCU..... | 10  |
| .....UCCGACGGUGUAAACU.....             | 3   |
| .....UCCGACGGUGUAAACUG.....            | 4   |
| .....UCCGACGGUGUAAACUGA.....           | 2   |
| .....UCCGACGGUGUAAACUGAG.....          | 2   |
| .....UCCGACGGUGUAAACUGAGCUUG.....      | 7   |
| .....UCCGACGGUGUAAACUGAGCUUGC.....     | 4   |
| .....UCCGACGGUGUAAACUGAGCUUGCUC.....   | 2   |
| .....UCCGACGGUGUAAACUGAGCUUGCUC.....   | 21  |
| .....UCCGACGGUGUAAACUGAGCUUGCUCU.....  | 48  |
| .....UCCGACGGUGUAAACUGAGCUUGCUCUU..... | 21  |
| .....CCGACGGUGUAAACUG.....             | 15  |
| .....CCGACGGUGUAAACUGA.....            | 82  |
| .....CCGACGGUGUAAACUGAG.....           | 180 |
| .....CCGACGGUGUAAACUGAGC.....          | 12  |
| .....CCGACGGUGUAAACUGAGCU.....         | 5   |
| .....CCGACGGUGUAAACUGAGCUU.....        | 6   |
| .....CCGACGGUGUAAACUGAGCUUG.....       | 10  |
| .....CCGACGGUGUAAACUGAGCUUGC.....      | 12  |
| .....CCGACGGUGUAAACUGAGCUUGCUC.....    | 17  |
| .....CCGACGGUGUAAACUGAGCUUGCUC.....    | 53  |
| .....CCGACGGUGUAAACUGAGCUUGCUCU.....   | 256 |
| .....CCGACGGUGUAAACUGAGCUUGCUCUU.....  | 165 |
| .....CCGACGGUGUAAACUGAGCUUGCUCUUU..... | 34  |
| .....CGACGGUGUAAACUGA.....             | 38  |
| .....CGACGGUGUAAACUGAG.....            | 82  |
| .....CGACGGUGUAAACUGAGC.....           | 5   |
| .....CGACGGUGUAAACUGAGCU.....          | 5   |
| .....CGACGGUGUAAACUGAGCUU.....         | 13  |
| .....CGACGGUGUAAACUGAGCUUG.....        | 18  |
| .....CGACGGUGUAAACUGAGCUUGC.....       | 20  |
| .....CGACGGUGUAAACUGAGCUUGCUC.....     | 12  |
| .....CGACGGUGUAAACUGAGCUUGCUC.....     | 82  |
| .....CGACGGUGUAAACUGAGCUUGCUCU.....    | 535 |
| .....CGACGGUGUAAACUGAGCUUGCUCUU.....   | 532 |
| .....CGACGGUGUAAACUGAGCUUGCUCUUU.....  | 147 |
| .....CGACGGUGUAAACUGAGCUUGCUCUUUU..... | 35  |
| .....GACGGUGUAAACUGAG.....             | 17  |
| .....GACGGUGUAAACUGAGC.....            | 3   |
| .....GACGGUGUAAACUGAGCU.....           | 12  |
| .....GACGGUGUAAACUGAGCUU.....          | 10  |
| .....GACGGUGUAAACUGAGCUUG.....         | 32  |
| .....GACGGUGUAAACUGAGCUUGC.....        | 18  |

|                                         |     |
|-----------------------------------------|-----|
| .....GACGGUGUAAACUGAGCUUGC.....         | 23  |
| .....GACGGUGUAAACUGAGCUUGCUC.....       | 80  |
| .....GACGGUGUAAACUGAGCUUGCUCU.....      | 556 |
| .....GACGGUGUAAACUGAGCUUGCUCUU.....     | 684 |
| .....GACGGUGUAAACUGAGCUUGCUCUUU.....    | 337 |
| .....GACGGUGUAAACUGAGCUUGCUCUUUU.....   | 114 |
| .....GACGGUGUAAACUGAGCUUGCUCUUUUU.....  | 5   |
| .....ACGGUGUAAACUGAGC.....              | 14  |
| .....ACGGUGUAAACUGAGCU.....             | 10  |
| .....ACGGUGUAAACUGAGCUU.....            | 14  |
| .....ACGGUGUAAACUGAGCUUG.....           | 45  |
| .....ACGGUGUAAACUGAGCUUGC.....          | 33  |
| .....ACGGUGUAAACUGAGCUUGCUC.....        | 38  |
| .....ACGGUGUAAACUGAGCUUGCUCUC.....      | 147 |
| .....ACGGUGUAAACUGAGCUUGCUCUCU.....     | 545 |
| .....ACGGUGUAAACUGAGCUUGCUCUCUU.....    | 583 |
| .....ACGGUGUAAACUGAGCUUGCUCUCUUU.....   | 253 |
| .....ACGGUGUAAACUGAGCUUGCUCUCUUUU.....  | 109 |
| .....ACGGUGUAAACUGAGCUUGCUCUCUUUUU..... | 8   |
| .....CGGUGUAAACUGAGCU.....              | 5   |
| .....CGGUGUAAACUGAGCUU.....             | 2   |
| .....CGGUGUAAACUGAGCUUG.....            | 16  |
| .....CGGUGUAAACUGAGCUUGC.....           | 12  |
| .....CGGUGUAAACUGAGCUUGCUC.....         | 19  |
| .....CGGUGUAAACUGAGCUUGCUCUC.....       | 111 |
| .....CGGUGUAAACUGAGCUUGCUCUCU.....      | 597 |
| .....CGGUGUAAACUGAGCUUGCUCUCUU.....     | 182 |
| .....CGGUGUAAACUGAGCUUGCUCUCUUU.....    | 96  |
| .....CGGUGUAAACUGAGCUUGCUCUCUUUU.....   | 46  |
| .....CGGUGUAAACUGAGCUUGCUCUCUUUUU.....  | 5   |
| .....GGUGUAAACUGAGCUU.....              | 6   |
| .....GGUGUAAACUGAGCUUG.....             | 19  |
| .....GGUGUAAACUGAGCUUGC.....            | 12  |
| .....GGUGUAAACUGAGCUUGCUC.....          | 12  |
| .....GGUGUAAACUGAGCUUGCUCUC.....        | 34  |
| .....GGUGUAAACUGAGCUUGCUCUCU.....       | 128 |
| .....GGUGUAAACUGAGCUUGCUCUCUU.....      | 171 |
| .....GGUGUAAACUGAGCUUGCUCUCUUU.....     | 299 |
| .....GGUGUAAACUGAGCUUGCUCUCUUUU.....    | 80  |
| .....GGUGUAAACUGAGCUUGCUCUCUUUUU.....   | 6   |
| .....GUGUAAACUGAGCUUG.....              | 73  |
| .....GUGUAAACUGAGCUUGC.....             | 40  |
| .....GUGUAAACUGAGCUUGCUC.....           | 21  |
| .....GUGUAAACUGAGCUUGCUCUC.....         | 41  |
| .....GUGUAAACUGAGCUUGCUCUCU.....        | 159 |
| .....GUGUAAACUGAGCUUGCUCUCUU.....       | 230 |
| .....GUGUAAACUGAGCUUGCUCUCUUU.....      | 268 |

|                               |       |
|-------------------------------|-------|
| .....GUGUAAACUGAGCUUGCUCUUUU. | 65    |
| .....GUGUAAACUGAGCUUGCUCUUUUU | 3     |
| .....UGUAAACUGAGCUUGC.....    | 86    |
| .....UGUAAACUGAGCUUGC.....    | 127   |
| .....UGUAAACUGAGCUUGCUC.....  | 427   |
| .....UGUAAACUGAGCUUGCUCU....  | 765   |
| .....UGUAAACUGAGCUUGCUCUU...  | 4914  |
| .....UGUAAACUGAGCUUGCUCUUU..  | 24745 |
| .....UGUAAACUGAGCUUGCUCUUUU.  | 11823 |
| .....UGUAAACUGAGCUUGCUCUUUUU  | 1285  |
| .....GUAAACUGAGCUUGCUC.....   | 29    |
| .....GUAAACUGAGCUUGCUC.....   | 181   |
| .....GUAAACUGAGCUUGCUCU....   | 582   |
| .....GUAAACUGAGCUUGCUCUU...   | 377   |
| .....GUAAACUGAGCUUGCUCUUU..   | 648   |
| .....GUAAACUGAGCUUGCUCUUUU.   | 411   |
| .....GUAAACUGAGCUUGCUCUUUUU   | 76    |
| .....UAAACUGAGCUUGCUC.....    | 37    |
| .....UAAACUGAGCUUGCUCU....    | 130   |
| .....UAAACUGAGCUUGCUCUU...    | 115   |
| .....UAAACUGAGCUUGCUCUUU..    | 165   |
| .....UAAACUGAGCUUGCUCUUUU.    | 104   |
| .....UAAACUGAGCUUGCUCUUUUU    | 97    |
| .....AAACUGAGCUUGCUCU....     | 82    |
| .....AAACUGAGCUUGCUCUU...     | 89    |
| .....AAACUGAGCUUGCUCUUU..     | 206   |
| .....AAACUGAGCUUGCUCUUUU.     | 77    |
| .....AAACUGAGCUUGCUCUUUUU     | 14    |
| .....AACUGAGCUUGCUCUU...      | 82    |
| .....AACUGAGCUUGCUCUUU..      | 166   |
| .....AACUGAGCUUGCUCUUUU.      | 60    |
| .....AACUGAGCUUGCUCUUUUU      | 5     |
| .....ACUGAGCUUGCUCUUU..       | 185   |
| .....ACUGAGCUUGCUCUUUU.       | 83    |
| .....ACUGAGCUUGCUCUUUUU       | 15    |
| .....CUGAGCUUGCUCUUUU.        | 203   |
| .....CUGAGCUUGCUCUUUUU        | 23    |
| .....UGAGCUUGCUCUUUUU         | 42    |

**#shR-nccr5 dT**

|                                                              |       |
|--------------------------------------------------------------|-------|
| uuguuGAGCAAGCUCAGUUUACACCUUguccgacggUGUAAACUGAGCUUGCUCUUUUuu | Reads |
| ..GUUGAGCAAGCUCAGUUUACACC.....                               | 13    |
| ...UUGAGCAAGCUCAGUUUACACC.....                               | 6     |
| ...UUGAGCAAGCUCAGUUUACACCU.....                              | 2     |
| ...UUGAGCAAGCUCAGUUUACACCUUG.....                            | 3     |
| ...UGAGCAAGCUCAGUUUACA.....                                  | 7     |
| ...UGAGCAAGCUCAGUUUACAC.....                                 | 5     |

|                                        |      |
|----------------------------------------|------|
| .....UGAGCAAGCUCAGUUUACACC.....        | 89   |
| .....UGAGCAAGCUCAGUUUACACCU.....       | 51   |
| .....UGAGCAAGCUCAGUUUACACCUU.....      | 4    |
| .....UGAGCAAGCUCAGUUUACACCUUG.....     | 4    |
| .....GAGCAAGCUCAGUUUA.....             | 590  |
| .....GAGCAAGCUCAGUUUAC.....            | 624  |
| .....GAGCAAGCUCAGUUUACA.....           | 843  |
| .....GAGCAAGCUCAGUUUACAC.....          | 2062 |
| .....GAGCAAGCUCAGUUUACACC.....         | 8780 |
| .....GAGCAAGCUCAGUUUACACCU.....        | 5728 |
| .....GAGCAAGCUCAGUUUACACCUU.....       | 1171 |
| .....GAGCAAGCUCAGUUUACACCUUG.....      | 3592 |
| .....GAGCAAGCUCAGUUUACACCUUGU.....     | 376  |
| .....GAGCAAGCUCAGUUUACACCUUGUC.....    | 205  |
| .....GAGCAAGCUCAGUUUACACCUUGUCC.....   | 463  |
| .....GAGCAAGCUCAGUUUACACCUUGUCCG.....  | 67   |
| .....GAGCAAGCUCAGUUUACACCUUGUCCGA..... | 7    |
| .....AGCAAGCUCAGUUUAC.....             | 50   |
| .....AGCAAGCUCAGUUUACA.....            | 70   |
| .....AGCAAGCUCAGUUUACAC.....           | 119  |
| .....AGCAAGCUCAGUUUACACC.....          | 284  |
| .....AGCAAGCUCAGUUUACACCU.....         | 604  |
| .....AGCAAGCUCAGUUUACACCUU.....        | 93   |
| .....AGCAAGCUCAGUUUACACCUUG.....       | 279  |
| .....AGCAAGCUCAGUUUACACCUUGU.....      | 79   |
| .....AGCAAGCUCAGUUUACACCUUGUC.....     | 48   |
| .....AGCAAGCUCAGUUUACACCUUGUCC.....    | 78   |
| .....AGCAAGCUCAGUUUACACCUUGUCCG.....   | 31   |
| .....AGCAAGCUCAGUUUACACCUUGUCCGA.....  | 40   |
| .....AGCAAGCUCAGUUUACACCUUGUCCGAC..... | 4    |
| .....GCAAGCUCAGUUUACA.....             | 26   |
| .....GCAAGCUCAGUUUACAC.....            | 43   |
| .....GCAAGCUCAGUUUACACC.....           | 260  |
| .....GCAAGCUCAGUUUACACCU.....          | 181  |
| .....GCAAGCUCAGUUUACACCUU.....         | 28   |
| .....GCAAGCUCAGUUUACACCUUG.....        | 122  |
| .....GCAAGCUCAGUUUACACCUUGU.....       | 30   |
| .....GCAAGCUCAGUUUACACCUUGUC.....      | 7    |
| .....GCAAGCUCAGUUUACACCUUGUCC.....     | 18   |
| .....GCAAGCUCAGUUUACACCUUGUCCG.....    | 10   |
| .....GCAAGCUCAGUUUACACCUUGUCCGA.....   | 2    |
| .....GCAAGCUCAGUUUACACCUUGUCCGAC.....  | 2    |
| .....GCAAGCUCAGUUUACACCUUGUCCGACG..... | 3    |
| .....CAAGCUCAGUUUACAC.....             | 47   |
| .....CAAGCUCAGUUUACACC.....            | 52   |
| .....CAAGCUCAGUUUACACCU.....           | 39   |
| .....CAAGCUCAGUUUACACCUU.....          | 19   |

|                                        |    |
|----------------------------------------|----|
| .....CAAGCUCAGUUUACACCUUG.....         | 16 |
| .....CAAGCUCAGUUUACACCUUGU.....        | 31 |
| .....CAAGCUCAGUUUACACCUUGUC.....       | 4  |
| .....CAAGCUCAGUUUACACCUUGUCC.....      | 7  |
| .....CAAGCUCAGUUUACACCUUGUCCG.....     | 12 |
| .....CAAGCUCAGUUUACACCUUGUCCGA.....    | 2  |
| .....CAAGCUCAGUUUACACCUUGUCCGACG.....  | 8  |
| .....CAAGCUCAGUUUACACCUUGUCCGACGG..... | 2  |
| .....AAGCUCAGUUUACACC.....             | 97 |
| .....AAGCUCAGUUUACACCU.....            | 78 |
| .....AAGCUCAGUUUACACCUU.....           | 15 |
| .....AAGCUCAGUUUACACCUUG.....          | 34 |
| .....AAGCUCAGUUUACACCUUGU.....         | 37 |
| .....AAGCUCAGUUUACACCUUGUC.....        | 5  |
| .....AAGCUCAGUUUACACCUUGUCC.....       | 4  |
| .....AAGCUCAGUUUACACCUUGUCCG.....      | 5  |
| .....AAGCUCAGUUUACACCUUGUCCGA.....     | 3  |
| .....AAGCUCAGUUUACACCUUGUCCGAC.....    | 4  |
| .....AAGCUCAGUUUACACCUUGUCCGACG.....   | 11 |
| .....AAGCUCAGUUUACACCUUGUCCGACGG.....  | 4  |
| .....AAGCUCAGUUUACACCUUGUCCGACGGU..... | 2  |
| .....AGCUCAGUUUACACCU.....             | 80 |
| .....AGCUCAGUUUACACCUU.....            | 12 |
| .....AGCUCAGUUUACACCUUG.....           | 48 |
| .....AGCUCAGUUUACACCUUGU.....          | 61 |
| .....AGCUCAGUUUACACCUUGUC.....         | 7  |
| .....AGCUCAGUUUACACCUUGUCC.....        | 3  |
| .....AGCUCAGUUUACACCUUGUCCG.....       | 8  |
| .....AGCUCAGUUUACACCUUGUCCGA.....      | 2  |
| .....AGCUCAGUUUACACCUUGUCCGACG.....    | 7  |
| .....GCUCAGUUUACACCUU.....             | 6  |
| .....GCUCAGUUUACACCUUG.....            | 34 |
| .....GCUCAGUUUACACCUUGU.....           | 5  |
| .....GCUCAGUUUACACCUUGUCC.....         | 5  |
| .....GCUCAGUUUACACCUUGUCCG.....        | 6  |
| .....GCUCAGUUUACACCUUGUCCGACG.....     | 3  |
| .....GCUCAGUUUACACCUUGUCCGACGG.....    | 3  |
| .....CUCAGUUUACACCUUG.....             | 76 |
| .....CUCAGUUUACACCUUGU.....            | 4  |
| .....CUCAGUUUACACCUUGUC.....           | 3  |
| .....CUCAGUUUACACCUUGUCC.....          | 6  |
| .....CUCAGUUUACACCUUGUCCG.....         | 7  |
| .....CUCAGUUUACACCUUGUCCGA.....        | 3  |
| .....CUCAGUUUACACCUUGUCCGAC.....       | 5  |
| .....CUCAGUUUACACCUUGUCCGACG.....      | 17 |
| .....CUCAGUUUACACCUUGUCCGACGG.....     | 18 |
| .....CUCAGUUUACACCUUGUCCGACGGU.....    | 5  |

|                                        |    |
|----------------------------------------|----|
| .....CUCAGUUUACACCUUGUCCGACGGUG.....   | 7  |
| .....CUCAGUUUACACCUUGUCCGACGGUGU.....  | 3  |
| .....UCAGUUUACACCUUGU.....             | 2  |
| .....UCAGUUUACACCUUGUCC.....           | 3  |
| .....UCAGUUUACACCUUGUCCG.....          | 6  |
| .....UCAGUUUACACCUUGUCCGACG.....       | 12 |
| .....UCAGUUUACACCUUGUCCGACGG.....      | 13 |
| .....UCAGUUUACACCUUGUCCGACGGU.....     | 2  |
| .....UCAGUUUACACCUUGUCCGACGGUGU.....   | 3  |
| .....UCAGUUUACACCUUGUCCGACGGUGUA.....  | 2  |
| .....CAGUUUACACCUUGUC.....             | 2  |
| .....CAGUUUACACCUUGUCC.....            | 2  |
| .....CAGUUUACACCUUGUCCG.....           | 10 |
| .....CAGUUUACACCUUGUCCGAC.....         | 8  |
| .....CAGUUUACACCUUGUCCGACG.....        | 21 |
| .....CAGUUUACACCUUGUCCGACGG.....       | 10 |
| .....CAGUUUACACCUUGUCCGACGGUG.....     | 5  |
| .....CAGUUUACACCUUGUCCGACGGUGU.....    | 8  |
| .....CAGUUUACACCUUGUCCGACGGUGUA.....   | 15 |
| .....CAGUUUACACCUUGUCCGACGGUGUAAA..... | 4  |
| .....AGUUUACACCUUGUCC.....             | 2  |
| .....AGUUUACACCUUGUCCG.....            | 3  |
| .....AGUUUACACCUUGUCCGAC.....          | 6  |
| .....AGUUUACACCUUGUCCGACG.....         | 6  |
| .....AGUUUACACCUUGUCCGACGG.....        | 8  |
| .....AGUUUACACCUUGUCCGACGGU.....       | 3  |
| .....AGUUUACACCUUGUCCGACGGUG.....      | 7  |
| .....AGUUUACACCUUGUCCGACGGUGU.....     | 7  |
| .....AGUUUACACCUUGUCCGACGGUGUA.....    | 14 |
| .....AGUUUACACCUUGUCCGACGGUGUAA.....   | 4  |
| .....AGUUUACACCUUGUCCGACGGUGUAAA.....  | 5  |
| .....GUUUACACCUUGUCCG.....             | 4  |
| .....GUUUACACCUUGUCCGAC.....           | 4  |
| .....GUUUACACCUUGUCCGACG.....          | 6  |
| .....GUUUACACCUUGUCCGACGG.....         | 5  |
| .....GUUUACACCUUGUCCGACGGU.....        | 2  |
| .....GUUUACACCUUGUCCGACGGUG.....       | 10 |
| .....GUUUACACCUUGUCCGACGGUGU.....      | 8  |
| .....GUUUACACCUUGUCCGACGGUGUA.....     | 25 |
| .....GUUUACACCUUGUCCGACGGUGUAA.....    | 4  |
| .....GUUUACACCUUGUCCGACGGUGUAAA.....   | 15 |
| .....UUUACACCUUGUCCGAC.....            | 2  |
| .....UUUACACCUUGUCCGACG.....           | 15 |
| .....UUUACACCUUGUCCGACGG.....          | 20 |
| .....UUUACACCUUGUCCGACGGU.....         | 7  |
| .....UUUACACCUUGUCCGACGGUG.....        | 19 |
| .....UUUACACCUUGUCCGACGGUGU.....       | 11 |

|                                       |     |
|---------------------------------------|-----|
| .....UUUACACCUUGUCCGACGGUGUA.....     | 12  |
| .....UUUACACCUUGUCCGACGGUGUAA.....    | 3   |
| .....UUUACACCUUGUCCGACGGUGUAAAC.....  | 6   |
| .....UUUACACCUUGUCCGACGGUGUAAACU..... | 2   |
| .....UUACACCUUGUCCGAC.....            | 3   |
| .....UUACACCUUGUCCGACG.....           | 3   |
| .....UUACACCUUGUCCGACGG.....          | 16  |
| .....UUACACCUUGUCCGACGGU.....         | 6   |
| .....UUACACCUUGUCCGACGGUG.....        | 7   |
| .....UUACACCUUGUCCGACGGUGU.....       | 9   |
| .....UUACACCUUGUCCGACGGUGUA.....      | 7   |
| .....UUACACCUUGUCCGACGGUGUAAA.....    | 7   |
| .....UUACACCUUGUCCGACGGUGUAAAC.....   | 31  |
| .....UACACCUUGUCCGACG.....            | 12  |
| .....UACACCUUGUCCGACGG.....           | 28  |
| .....UACACCUUGUCCGACGGU.....          | 9   |
| .....UACACCUUGUCCGACGGUG.....         | 14  |
| .....UACACCUUGUCCGACGGUGU.....        | 30  |
| .....UACACCUUGUCCGACGGUGUAA.....      | 3   |
| .....UACACCUUGUCCGACGGUGUAAA.....     | 20  |
| .....UACACCUUGUCCGACGGUGUAAAC.....    | 8   |
| .....UACACCUUGUCCGACGGUGUAAACUGA..... | 2   |
| .....ACACCUUGUCCGACGG.....            | 26  |
| .....ACACCUUGUCCGACGGU.....           | 8   |
| .....ACACCUUGUCCGACGGUG.....          | 4   |
| .....ACACCUUGUCCGACGGUGUA.....        | 3   |
| .....ACACCUUGUCCGACGGUGUAA.....       | 7   |
| .....ACACCUUGUCCGACGGUGUAAA.....      | 5   |
| .....ACACCUUGUCCGACGGUGUAAAC.....     | 4   |
| .....ACACCUUGUCCGACGGUGUAAACU.....    | 3   |
| .....CACCUUGUCCGACGGU.....            | 49  |
| .....CACCUUGUCCGACGGUGU.....          | 18  |
| .....CACCUUGUCCGACGGUGUA.....         | 67  |
| .....CACCUUGUCCGACGGUGUAA.....        | 5   |
| .....CACCUUGUCCGACGGUGUAAA.....       | 44  |
| .....CACCUUGUCCGACGGUGUAAAC.....      | 48  |
| .....CACCUUGUCCGACGGUGUAAACU.....     | 13  |
| .....CACCUUGUCCGACGGUGUAAACUG.....    | 3   |
| .....CACCUUGUCCGACGGUGUAAACUGA.....   | 6   |
| .....CACCUUGUCCGACGGUGUAAACUGAG.....  | 8   |
| .....ACCUUGUCCGACGGUG.....            | 45  |
| .....ACCUUGUCCGACGGUGU.....           | 59  |
| .....ACCUUGUCCGACGGUGUA.....          | 107 |
| .....ACCUUGUCCGACGGUGUAA.....         | 9   |
| .....ACCUUGUCCGACGGUGUAAA.....        | 130 |
| .....ACCUUGUCCGACGGUGUAAAC.....       | 42  |
| .....ACCUUGUCCGACGGUGUAAACU.....      | 18  |



|                                        |     |
|----------------------------------------|-----|
| .....ACCUUGUCCGACGGUGUAAACUG.....      | 20  |
| .....ACCUUGUCCGACGGUGUAAACUGA.....     | 6   |
| .....ACCUUGUCCGACGGUGUAAACUGAG.....    | 22  |
| .....ACCUUGUCCGACGGUGUAAACUGAGC.....   | 9   |
| .....ACCUUGUCCGACGGUGUAAACUGAGCU.....  | 10  |
| .....ACCUUGUCCGACGGUGUAAACUGAGCUU..... | 5   |
| .....CCUUGUCCGACGGUGU.....             | 26  |
| .....CCUUGUCCGACGGUGUA.....            | 113 |
| .....CCUUGUCCGACGGUGUAA.....           | 20  |
| .....CCUUGUCCGACGGUGUAAA.....          | 102 |
| .....CCUUGUCCGACGGUGUAAAC.....         | 77  |
| .....CCUUGUCCGACGGUGUAAACU.....        | 24  |
| .....CCUUGUCCGACGGUGUAAACUG.....       | 40  |
| .....CCUUGUCCGACGGUGUAAACUGA.....      | 13  |
| .....CCUUGUCCGACGGUGUAAACUGAG.....     | 43  |
| .....CCUUGUCCGACGGUGUAAACUGAGC.....    | 27  |
| .....CCUUGUCCGACGGUGUAAACUGAGCU.....   | 34  |
| .....CCUUGUCCGACGGUGUAAACUGAGCUU.....  | 26  |
| .....CCUUGUCCGACGGUGUAAACUGAGCUUG..... | 27  |
| .....CUUGUCCGACGGUGUA.....             | 65  |
| .....CUUGUCCGACGGUGUAA.....            | 23  |
| .....CUUGUCCGACGGUGUAAA.....           | 107 |
| .....CUUGUCCGACGGUGUAAAC.....          | 94  |
| .....CUUGUCCGACGGUGUAAACU.....         | 28  |
| .....CUUGUCCGACGGUGUAAACUG.....        | 60  |
| .....CUUGUCCGACGGUGUAAACUGA.....       | 30  |
| .....CUUGUCCGACGGUGUAAACUGAG.....      | 100 |
| .....CUUGUCCGACGGUGUAAACUGAGC.....     | 64  |
| .....CUUGUCCGACGGUGUAAACUGAGCU.....    | 94  |
| .....CUUGUCCGACGGUGUAAACUGAGCUU.....   | 80  |
| .....CUUGUCCGACGGUGUAAACUGAGCUUG.....  | 158 |
| .....CUUGUCCGACGGUGUAAACUGAGCUUGC..... | 13  |
| .....UUGUCCGACGGUGUAA.....             | 15  |
| .....UUGUCCGACGGUGUAAA.....            | 46  |
| .....UUGUCCGACGGUGUAAAC.....           | 38  |
| .....UUGUCCGACGGUGUAAACU.....          | 17  |
| .....UUGUCCGACGGUGUAAACUG.....         | 30  |
| .....UUGUCCGACGGUGUAAACUGA.....        | 19  |
| .....UUGUCCGACGGUGUAAACUGAG.....       | 40  |
| .....UUGUCCGACGGUGUAAACUGAGC.....      | 20  |
| .....UUGUCCGACGGUGUAAACUGAGCU.....     | 33  |
| .....UUGUCCGACGGUGUAAACUGAGCUU.....    | 36  |
| .....UUGUCCGACGGUGUAAACUGAGCUUG.....   | 80  |
| .....UUGUCCGACGGUGUAAACUGAGCUUGC.....  | 13  |
| .....UUGUCCGACGGUGUAAACUGAGCUUGC.....  | 2   |
| .....UGUCCGACGGUGUAAA.....             | 22  |
| .....UGUCCGACGGUGUAAAC.....            | 19  |

|                                        |     |
|----------------------------------------|-----|
| .....UGUCCGACGGUGUAAACU.....           | 6   |
| .....UGUCCGACGGUGUAAACUG.....          | 12  |
| .....UGUCCGACGGUGUAAACUGA.....         | 17  |
| .....UGUCCGACGGUGUAAACUGAG.....        | 22  |
| .....UGUCCGACGGUGUAAACUGAGC.....       | 22  |
| .....UGUCCGACGGUGUAAACUGAGCU.....      | 25  |
| .....UGUCCGACGGUGUAAACUGAGCUU.....     | 35  |
| .....UGUCCGACGGUGUAAACUGAGCUUG.....    | 76  |
| .....UGUCCGACGGUGUAAACUGAGCUUGC.....   | 21  |
| .....UGUCCGACGGUGUAAACUGAGCUUGCUC..... | 17  |
| .....UGUCCGACGGUGUAAACUGAGCUUGCUC..... | 3   |
| .....GUCCGACGGUGUAAAC.....             | 3   |
| .....GUCCGACGGUGUAAACU.....            | 2   |
| .....GUCCGACGGUGUAAACUG.....           | 6   |
| .....GUCCGACGGUGUAAACUGA.....          | 5   |
| .....GUCCGACGGUGUAAACUGAG.....         | 6   |
| .....GUCCGACGGUGUAAACUGAGC.....        | 7   |
| .....GUCCGACGGUGUAAACUGAGCU.....       | 7   |
| .....GUCCGACGGUGUAAACUGAGCUU.....      | 11  |
| .....GUCCGACGGUGUAAACUGAGCUUG.....     | 29  |
| .....GUCCGACGGUGUAAACUGAGCUUGC.....    | 7   |
| .....GUCCGACGGUGUAAACUGAGCUUGCUC.....  | 5   |
| .....GUCCGACGGUGUAAACUGAGCUUGCUC.....  | 7   |
| .....GUCCGACGGUGUAAACUGAGCUUGCUCU..... | 8   |
| .....UCCGACGGUGUAAACU.....             | 3   |
| .....UCCGACGGUGUAAACUG.....            | 4   |
| .....UCCGACGGUGUAAACUGA.....           | 4   |
| .....UCCGACGGUGUAAACUGAGC.....         | 5   |
| .....UCCGACGGUGUAAACUGAGCU.....        | 4   |
| .....UCCGACGGUGUAAACUGAGCUU.....       | 2   |
| .....UCCGACGGUGUAAACUGAGCUUG.....      | 3   |
| .....UCCGACGGUGUAAACUGAGCUUGC.....     | 9   |
| .....UCCGACGGUGUAAACUGAGCUUGCUC.....   | 5   |
| .....UCCGACGGUGUAAACUGAGCUUGCUC.....   | 13  |
| .....UCCGACGGUGUAAACUGAGCUUGCUCU.....  | 37  |
| .....UCCGACGGUGUAAACUGAGCUUGCUCU.....  | 27  |
| .....CCGACGGUGUAAACUG.....             | 22  |
| .....CCGACGGUGUAAACUGA.....            | 181 |
| .....CCGACGGUGUAAACUGAG.....           | 385 |
| .....CCGACGGUGUAAACUGAGC.....          | 12  |
| .....CCGACGGUGUAAACUGAGCU.....         | 11  |
| .....CCGACGGUGUAAACUGAGCUU.....        | 6   |
| .....CCGACGGUGUAAACUGAGCUUG.....       | 15  |
| .....CCGACGGUGUAAACUGAGCUUGC.....      | 10  |
| .....CCGACGGUGUAAACUGAGCUUGCUC.....    | 16  |
| .....CCGACGGUGUAAACUGAGCUUGCUC.....    | 48  |
| .....CCGACGGUGUAAACUGAGCUUGCUCU.....   | 198 |

|                                     |     |
|-------------------------------------|-----|
| .....CCGACGGUGUAAACUGAGCUUGCUCUU... | 175 |
| .....CCGACGGUGUAAACUGAGCUUGCUCUUU.. | 21  |
| .....CGACGGUGUAAACUGA.....          | 80  |
| .....CGACGGUGUAAACUGAG.....         | 173 |
| .....CGACGGUGUAAACUGAGC.....        | 15  |
| .....CGACGGUGUAAACUGAGCU.....       | 11  |
| .....CGACGGUGUAAACUGAGCUU.....      | 7   |
| .....CGACGGUGUAAACUGAGCUUG.....     | 31  |
| .....CGACGGUGUAAACUGAGCUUGC.....    | 20  |
| .....CGACGGUGUAAACUGAGCUUGCUC.....  | 21  |
| .....CGACGGUGUAAACUGAGCUUGCUC.....  | 96  |
| .....CGACGGUGUAAACUGAGCUUGCUCU...   | 437 |
| .....CGACGGUGUAAACUGAGCUUGCUCUU...  | 572 |
| .....CGACGGUGUAAACUGAGCUUGCUCUUU..  | 100 |
| .....CGACGGUGUAAACUGAGCUUGCUCUUUU.  | 3   |
| .....GACGGUGUAAACUGAG.....          | 12  |
| .....GACGGUGUAAACUGAGC.....         | 7   |
| .....GACGGUGUAAACUGAGCU.....        | 12  |
| .....GACGGUGUAAACUGAGCUU.....       | 18  |
| .....GACGGUGUAAACUGAGCUUG.....      | 37  |
| .....GACGGUGUAAACUGAGCUUGC.....     | 26  |
| .....GACGGUGUAAACUGAGCUUGCUC.....   | 18  |
| .....GACGGUGUAAACUGAGCUUGCUC.....   | 90  |
| .....GACGGUGUAAACUGAGCUUGCUCU...    | 539 |
| .....GACGGUGUAAACUGAGCUUGCUCUU...   | 941 |
| .....GACGGUGUAAACUGAGCUUGCUCUUU..   | 288 |
| .....GACGGUGUAAACUGAGCUUGCUCUUUU.   | 16  |
| .....GACGGUGUAAACUGAGCUUGCUCUUUUU   | 2   |
| .....ACGGUGUAAACUGAGC.....          | 19  |
| .....ACGGUGUAAACUGAGCU.....         | 13  |
| .....ACGGUGUAAACUGAGCUU.....        | 23  |
| .....ACGGUGUAAACUGAGCUUG.....       | 51  |
| .....ACGGUGUAAACUGAGCUUGC.....      | 46  |
| .....ACGGUGUAAACUGAGCUUGCUC.....    | 44  |
| .....ACGGUGUAAACUGAGCUUGCUC.....    | 185 |
| .....ACGGUGUAAACUGAGCUUGCUCU...     | 878 |
| .....ACGGUGUAAACUGAGCUUGCUCUU...    | 853 |
| .....ACGGUGUAAACUGAGCUUGCUCUUU..    | 190 |
| .....ACGGUGUAAACUGAGCUUGCUCUUUU.    | 14  |
| .....CGGUGUAAACUGAGCU.....          | 10  |
| .....CGGUGUAAACUGAGCUU.....         | 3   |
| .....CGGUGUAAACUGAGCUUG.....        | 18  |
| .....CGGUGUAAACUGAGCUUGC.....       | 17  |
| .....CGGUGUAAACUGAGCUUGCUC.....     | 15  |
| .....CGGUGUAAACUGAGCUUGCUC.....     | 113 |
| .....CGGUGUAAACUGAGCUUGCUCU...      | 551 |
| .....CGGUGUAAACUGAGCUUGCUCUU...     | 273 |

|                                 |       |
|---------------------------------|-------|
| .....CGGUGUAAACUGAGCUUGCUCUUU.. | 95    |
| .....CGGUGUAAACUGAGCUUGCUCUUUU. | 8     |
| .....GGUGUAAACUGAGCUU.....      | 12    |
| .....GGUGUAAACUGAGCUUG.....     | 29    |
| .....GGUGUAAACUGAGCUUGC.....    | 23    |
| .....GGUGUAAACUGAGCUUGC.....    | 20    |
| .....GGUGUAAACUGAGCUUGCUC.....  | 61    |
| .....GGUGUAAACUGAGCUUGCUCU....  | 272   |
| .....GGUGUAAACUGAGCUUGCUCUU...  | 820   |
| .....GGUGUAAACUGAGCUUGCUCUUU..  | 1432  |
| .....GGUGUAAACUGAGCUUGCUCUUUU.  | 64    |
| .....GGUGUAAACUGAGCUUGCUCUUUUU  | 4     |
| .....GUGUAAACUGAGCUUG.....      | 90    |
| .....GUGUAAACUGAGCUUGC.....     | 29    |
| .....GUGUAAACUGAGCUUGC.....     | 15    |
| .....GUGUAAACUGAGCUUGCUC.....   | 46    |
| .....GUGUAAACUGAGCUUGCUCU....   | 191   |
| .....GUGUAAACUGAGCUUGCUCUU...   | 351   |
| .....GUGUAAACUGAGCUUGCUCUUU..   | 247   |
| .....GUGUAAACUGAGCUUGCUCUUUU.   | 22    |
| .....GUGUAAACUGAGCUUGCUCUUUUU   | 3     |
| .....UGUAAACUGAGCUUGC.....      | 101   |
| .....UGUAAACUGAGCUUGC.....      | 120   |
| .....UGUAAACUGAGCUUGCUC.....    | 473   |
| .....UGUAAACUGAGCUUGCUCU....    | 1029  |
| .....UGUAAACUGAGCUUGCUCUU...    | 8229  |
| .....UGUAAACUGAGCUUGCUCUUU..    | 27351 |
| .....UGUAAACUGAGCUUGCUCUUUU.    | 2886  |
| .....UGUAAACUGAGCUUGCUCUUUUU    | 202   |
| .....GUAAACUGAGCUUGC.....       | 19    |
| .....GUAAACUGAGCUUGCUC.....     | 178   |
| .....GUAAACUGAGCUUGCUCU....     | 630   |
| .....GUAAACUGAGCUUGCUCUU...     | 521   |
| .....GUAAACUGAGCUUGCUCUUU..     | 817   |
| .....GUAAACUGAGCUUGCUCUUUU.     | 74    |
| .....GUAAACUGAGCUUGCUCUUUUU     | 2     |
| .....UAAACUGAGCUUGCUC.....      | 36    |
| .....UAAACUGAGCUUGCUCU....      | 120   |
| .....UAAACUGAGCUUGCUCUU...      | 148   |
| .....UAAACUGAGCUUGCUCUUU..      | 207   |
| .....UAAACUGAGCUUGCUCUUUU.      | 13    |
| .....UAAACUGAGCUUGCUCUUUUU      | 2     |
| .....AAACUGAGCUUGCUCU....       | 89    |
| .....AAACUGAGCUUGCUCUU...       | 130   |
| .....AAACUGAGCUUGCUCUUU..       | 281   |
| .....AAACUGAGCUUGCUCUUUU.       | 30    |
| .....AAACUGAGCUUGCUCUUUUU       | 3     |

|                           |     |
|---------------------------|-----|
| .....AACUGAGCUUGCUCUU...  | 110 |
| .....AACUGAGCUUGCUCUUU..  | 175 |
| .....AACUGAGCUUGCUCUUUU.. | 22  |
| .....ACUGAGCUUGCUCUUU..   | 221 |
| .....ACUGAGCUUGCUCUUUU..  | 21  |
| .....CUGAGCUUGCUCUUUU..   | 62  |
| .....CUGAGCUUGCUCUUUUU    | 6   |
| .....UGAGCUUGCUCUUUUU     | 9   |

**#shR-nccr5 dTT**

|                                                            | Reads |
|------------------------------------------------------------|-------|
| uuuguGAGCAAGCUCAGUUUACACCUUguccgacggUGUAAACUGAGCUUGCUCUUuu |       |
| ..GUGAGCAAGCUCAGUUUACA.....                                | 8     |
| ..GUGAGCAAGCUCAGUUUACAC.....                               | 8     |
| ..GUGAGCAAGCUCAGUUUACACC.....                              | 169   |
| ...UGAGCAAGCUCAGUUUACACC.....                              | 2     |
| ...GAGCAAGCUCAGUUUA.....                                   | 209   |
| ...GAGCAAGCUCAGUUUAC.....                                  | 194   |
| ...GAGCAAGCUCAGUUUACA.....                                 | 236   |
| ...GAGCAAGCUCAGUUUACAC.....                                | 621   |
| ...GAGCAAGCUCAGUUUACACC.....                               | 2819  |
| ...GAGCAAGCUCAGUUUACACCU.....                              | 1993  |
| ...GAGCAAGCUCAGUUUACACCUU.....                             | 365   |
| ...GAGCAAGCUCAGUUUACACCUUG.....                            | 1560  |
| ...GAGCAAGCUCAGUUUACACCUUGU.....                           | 106   |
| ...GAGCAAGCUCAGUUUACACCUUGUC.....                          | 66    |
| ...GAGCAAGCUCAGUUUACACCUUGUCC.....                         | 133   |
| ...GAGCAAGCUCAGUUUACACCUUGUCCG.....                        | 35    |
| ....AGCAAGCUCAGUUUAC.....                                  | 151   |
| ....AGCAAGCUCAGUUUACA.....                                 | 189   |
| ....AGCAAGCUCAGUUUACAC.....                                | 265   |
| ....AGCAAGCUCAGUUUACACC.....                               | 690   |
| ....AGCAAGCUCAGUUUACACCU.....                              | 1897  |
| ....AGCAAGCUCAGUUUACACCUU.....                             | 367   |
| ....AGCAAGCUCAGUUUACACCUUG.....                            | 1143  |
| ....AGCAAGCUCAGUUUACACCUUGU.....                           | 205   |
| ....AGCAAGCUCAGUUUACACCUUGUC.....                          | 122   |
| ....AGCAAGCUCAGUUUACACCUUGUCC.....                         | 233   |
| ....AGCAAGCUCAGUUUACACCUUGUCCG.....                        | 82    |
| ....AGCAAGCUCAGUUUACACCUUGUCCGA.....                       | 81    |
| ....AGCAAGCUCAGUUUACACCUUGUCCGAC.....                      | 7     |
| .....GCAAGCUCAGUUUACA.....                                 | 85    |
| .....GCAAGCUCAGUUUACAC.....                                | 180   |
| .....GCAAGCUCAGUUUACACC.....                               | 645   |
| .....GCAAGCUCAGUUUACACCU.....                              | 1427  |
| .....GCAAGCUCAGUUUACACCUU.....                             | 195   |
| .....GCAAGCUCAGUUUACACCUUG.....                            | 911   |
| .....GCAAGCUCAGUUUACACCUUGU.....                           | 70    |

|                                        |     |
|----------------------------------------|-----|
| .....GCAAGCUCAGUUUACACCUUGUC.....      | 46  |
| .....GCAAGCUCAGUUUACACCUUGUCC.....     | 77  |
| .....GCAAGCUCAGUUUACACCUUGUCCG.....    | 24  |
| .....GCAAGCUCAGUUUACACCUUGUCCGA.....   | 11  |
| .....GCAAGCUCAGUUUACACCUUGUCCGAC.....  | 4   |
| .....GCAAGCUCAGUUUACACCUUGUCCGACG..... | 4   |
| .....CAAGCUCAGUUUACAC.....             | 38  |
| .....CAAGCUCAGUUUACACC.....            | 48  |
| .....CAAGCUCAGUUUACACCU.....           | 30  |
| .....CAAGCUCAGUUUACACCUU.....          | 8   |
| .....CAAGCUCAGUUUACACCUUG.....         | 30  |
| .....CAAGCUCAGUUUACACCUUGU.....        | 24  |
| .....CAAGCUCAGUUUACACCUUGUC.....       | 3   |
| .....CAAGCUCAGUUUACACCUUGUCCG.....     | 5   |
| .....CAAGCUCAGUUUACACCUUGUCCGA.....    | 2   |
| .....CAAGCUCAGUUUACACCUUGUCCGAC.....   | 2   |
| .....CAAGCUCAGUUUACACCUUGUCCGACG.....  | 2   |
| .....AAGCUCAGUUUACACC.....             | 169 |
| .....AAGCUCAGUUUACACCU.....            | 192 |
| .....AAGCUCAGUUUACACCUU.....           | 32  |
| .....AAGCUCAGUUUACACCUUG.....          | 89  |
| .....AAGCUCAGUUUACACCUUGU.....         | 43  |
| .....AAGCUCAGUUUACACCUUGUC.....        | 7   |
| .....AAGCUCAGUUUACACCUUGUCC.....       | 17  |
| .....AAGCUCAGUUUACACCUUGUCCG.....      | 7   |
| .....AAGCUCAGUUUACACCUUGUCCGA.....     | 11  |
| .....AAGCUCAGUUUACACCUUGUCCGAC.....    | 14  |
| .....AAGCUCAGUUUACACCUUGUCCGACG.....   | 17  |
| .....AAGCUCAGUUUACACCUUGUCCGACGG.....  | 5   |
| .....AGCUCAGUUUACACCU.....             | 75  |
| .....AGCUCAGUUUACACCUU.....            | 15  |
| .....AGCUCAGUUUACACCUUG.....           | 48  |
| .....AGCUCAGUUUACACCUUGU.....          | 52  |
| .....AGCUCAGUUUACACCUUGUC.....         | 4   |
| .....AGCUCAGUUUACACCUUGUCC.....        | 6   |
| .....AGCUCAGUUUACACCUUGUCCG.....       | 4   |
| .....AGCUCAGUUUACACCUUGUCCGA.....      | 3   |
| .....AGCUCAGUUUACACCUUGUCCGAC.....     | 2   |
| .....AGCUCAGUUUACACCUUGUCCGACG.....    | 9   |
| .....AGCUCAGUUUACACCUUGUCCGACGG.....   | 3   |
| .....GCUCAGUUUACACCUU.....             | 7   |
| .....GCUCAGUUUACACCUUG.....            | 27  |
| .....GCUCAGUUUACACCUUGU.....           | 3   |
| .....GCUCAGUUUACACCUUGUCC.....         | 3   |
| .....GCUCAGUUUACACCUUGUCCGAC.....      | 3   |
| .....GCUCAGUUUACACCUUGUCCGACG.....     | 4   |
| .....GCUCAGUUUACACCUUGUCCGACGG.....    | 2   |

|                                        |    |
|----------------------------------------|----|
| .....CUCAGUUUACACCUUG.....             | 60 |
| .....CUCAGUUUACACCUUGU.....            | 7  |
| .....CUCAGUUUACACCUUGUC.....           | 2  |
| .....CUCAGUUUACACCUUGUCC.....          | 6  |
| .....CUCAGUUUACACCUUGUCCG.....         | 6  |
| .....CUCAGUUUACACCUUGUCCGAC.....       | 5  |
| .....CUCAGUUUACACCUUGUCCGACG.....      | 10 |
| .....CUCAGUUUACACCUUGUCCGACGG.....     | 9  |
| .....CUCAGUUUACACCUUGUCCGACGGU.....    | 4  |
| .....CUCAGUUUACACCUUGUCCGACGGUGU.....  | 3  |
| .....UCAGUUUACACCUUGU.....             | 2  |
| .....UCAGUUUACACCUUGUCCG.....          | 2  |
| .....UCAGUUUACACCUUGUCCGA.....         | 3  |
| .....UCAGUUUACACCUUGUCCGAC.....        | 2  |
| .....UCAGUUUACACCUUGUCCGACG.....       | 3  |
| .....UCAGUUUACACCUUGUCCGACGG.....      | 7  |
| .....UCAGUUUACACCUUGUCCGACGGU.....     | 3  |
| .....UCAGUUUACACCUUGUCCGACGGUG.....    | 4  |
| .....CAGUUUACACCUUGUC.....             | 3  |
| .....CAGUUUACACCUUGUCC.....            | 7  |
| .....CAGUUUACACCUUGUCCG.....           | 10 |
| .....CAGUUUACACCUUGUCCGA.....          | 3  |
| .....CAGUUUACACCUUGUCCGAC.....         | 6  |
| .....CAGUUUACACCUUGUCCGACG.....        | 11 |
| .....CAGUUUACACCUUGUCCGACGG.....       | 10 |
| .....CAGUUUACACCUUGUCCGACGGU.....      | 2  |
| .....CAGUUUACACCUUGUCCGACGGUG.....     | 6  |
| .....CAGUUUACACCUUGUCCGACGGUGU.....    | 4  |
| .....CAGUUUACACCUUGUCCGACGGUGUA.....   | 3  |
| .....CAGUUUACACCUUGUCCGACGGUGUAA.....  | 4  |
| .....CAGUUUACACCUUGUCCGACGGUGUAAA..... | 7  |
| .....AGUUUACACCUUGUCC.....             | 4  |
| .....AGUUUACACCUUGUCCG.....            | 2  |
| .....AGUUUACACCUUGUCCGA.....           | 2  |
| .....AGUUUACACCUUGUCCGAC.....          | 3  |
| .....AGUUUACACCUUGUCCGACGG.....        | 4  |
| .....AGUUUACACCUUGUCCGACGGUG.....      | 3  |
| .....AGUUUACACCUUGUCCGACGGUGU.....     | 6  |
| .....AGUUUACACCUUGUCCGACGGUGUA.....    | 3  |
| .....AGUUUACACCUUGUCCGACGGUGUAA.....   | 2  |
| .....AGUUUACACCUUGUCCGACGGUGUAAA.....  | 5  |
| .....GUUUACACCUUGUCCG.....             | 2  |
| .....GUUUACACCUUGUCCGA.....            | 4  |
| .....GUUUACACCUUGUCCGAC.....           | 3  |
| .....GUUUACACCUUGUCCGACG.....          | 2  |
| .....GUUUACACCUUGUCCGACGG.....         | 4  |
| .....GUUUACACCUUGUCCGACGGU.....        | 2  |

|                                      |    |
|--------------------------------------|----|
| .....GUUUACACCUUGUCCGACGGUG.....     | 7  |
| .....GUUUACACCUUGUCCGACGGUGU.....    | 4  |
| .....GUUUACACCUUGUCCGACGGUGUA.....   | 20 |
| .....GUUUACACCUUGUCCGACGGUGUAA.....  | 3  |
| .....GUUUACACCUUGUCCGACGGUGUAAA..... | 5  |
| .....UUUACACCUUGUCCGAC.....          | 3  |
| .....UUUACACCUUGUCCGACG.....         | 11 |
| .....UUUACACCUUGUCCGACGG.....        | 13 |
| .....UUUACACCUUGUCCGACGGU.....       | 2  |
| .....UUUACACCUUGUCCGACGGUG.....      | 10 |
| .....UUUACACCUUGUCCGACGGUGU.....     | 10 |
| .....UUUACACCUUGUCCGACGGUGUA.....    | 5  |
| .....UUUACACCUUGUCCGACGGUGUAA.....   | 2  |
| .....UUUACACCUUGUCCGACGGUGUAAAC..... | 3  |
| .....UUACACCUUGUCCGAC.....           | 2  |
| .....UUACACCUUGUCCGACG.....          | 6  |
| .....UUACACCUUGUCCGACGG.....         | 10 |
| .....UUACACCUUGUCCGACGGU.....        | 4  |
| .....UUACACCUUGUCCGACGGUG.....       | 7  |
| .....UUACACCUUGUCCGACGGUGU.....      | 11 |
| .....UUACACCUUGUCCGACGGUGUA.....     | 4  |
| .....UUACACCUUGUCCGACGGUGUAAA.....   | 7  |
| .....UUACACCUUGUCCGACGGUGUAAAC.....  | 12 |
| .....UACACCUUGUCCGACG.....           | 15 |
| .....UACACCUUGUCCGACGG.....          | 21 |
| .....UACACCUUGUCCGACGGU.....         | 7  |
| .....UACACCUUGUCCGACGGUG.....        | 7  |
| .....UACACCUUGUCCGACGGUGU.....       | 22 |
| .....UACACCUUGUCCGACGGUGUAAA.....    | 22 |
| .....UACACCUUGUCCGACGGUGUAAAC.....   | 4  |
| .....ACACCUUGUCCGACGG.....           | 23 |
| .....ACACCUUGUCCGACGGU.....          | 4  |
| .....ACACCUUGUCCGACGGUG.....         | 3  |
| .....ACACCUUGUCCGACGGUGUA.....       | 2  |
| .....ACACCUUGUCCGACGGUGUAA.....      | 4  |
| .....ACACCUUGUCCGACGGUGUAAA.....     | 2  |
| .....ACACCUUGUCCGACGGUGUAAAC.....    | 4  |
| .....CACCUUGUCCGACGGU.....           | 41 |
| .....CACCUUGUCCGACGGUG.....          | 2  |
| .....CACCUUGUCCGACGGUGU.....         | 15 |
| .....CACCUUGUCCGACGGUGUA.....        | 50 |
| .....CACCUUGUCCGACGGUGUAA.....       | 9  |
| .....CACCUUGUCCGACGGUGUAAA.....      | 32 |
| .....CACCUUGUCCGACGGUGUAAAC.....     | 33 |
| .....CACCUUGUCCGACGGUGUAAACU.....    | 4  |
| .....CACCUUGUCCGACGGUGUAAACUG.....   | 5  |
| .....CACCUUGUCCGACGGUGUAAACUGA.....  | 2  |



|                                        |     |
|----------------------------------------|-----|
| .....CACCUUGUCCGACGGUGUAAACUGAG.....   | 10  |
| .....CACCUUGUCCGACGGUGUAAACUGAGC.....  | 2   |
| .....ACCUUGUCCGACGGUG.....             | 39  |
| .....ACCUUGUCCGACGGUGU.....            | 30  |
| .....ACCUUGUCCGACGGUGUA.....           | 57  |
| .....ACCUUGUCCGACGGUGUAA.....          | 2   |
| .....ACCUUGUCCGACGGUGUAAA.....         | 61  |
| .....ACCUUGUCCGACGGUGUAAAC.....        | 17  |
| .....ACCUUGUCCGACGGUGUAAACU.....       | 5   |
| .....ACCUUGUCCGACGGUGUAAACUG.....      | 15  |
| .....ACCUUGUCCGACGGUGUAAACUGA.....     | 12  |
| .....ACCUUGUCCGACGGUGUAAACUGAG.....    | 35  |
| .....ACCUUGUCCGACGGUGUAAACUGAGC.....   | 18  |
| .....ACCUUGUCCGACGGUGUAAACUGAGCU.....  | 9   |
| .....ACCUUGUCCGACGGUGUAAACUGAGCUU..... | 3   |
| .....CCUUGUCCGACGGUGU.....             | 26  |
| .....CCUUGUCCGACGGUGUA.....            | 80  |
| .....CCUUGUCCGACGGUGUAA.....           | 11  |
| .....CCUUGUCCGACGGUGUAAA.....          | 51  |
| .....CCUUGUCCGACGGUGUAAAC.....         | 37  |
| .....CCUUGUCCGACGGUGUAAACU.....        | 14  |
| .....CCUUGUCCGACGGUGUAAACUG.....       | 41  |
| .....CCUUGUCCGACGGUGUAAACUGA.....      | 24  |
| .....CCUUGUCCGACGGUGUAAACUGAG.....     | 87  |
| .....CCUUGUCCGACGGUGUAAACUGAGC.....    | 39  |
| .....CCUUGUCCGACGGUGUAAACUGAGCU.....   | 47  |
| .....CCUUGUCCGACGGUGUAAACUGAGCUU.....  | 24  |
| .....CCUUGUCCGACGGUGUAAACUGAGCUUG..... | 15  |
| .....CUUGUCCGACGGUGUA.....             | 47  |
| .....CUUGUCCGACGGUGUAA.....            | 16  |
| .....CUUGUCCGACGGUGUAAA.....           | 109 |
| .....CUUGUCCGACGGUGUAAAC.....          | 54  |
| .....CUUGUCCGACGGUGUAAACU.....         | 18  |
| .....CUUGUCCGACGGUGUAAACUG.....        | 44  |
| .....CUUGUCCGACGGUGUAAACUGA.....       | 24  |
| .....CUUGUCCGACGGUGUAAACUGAG.....      | 100 |
| .....CUUGUCCGACGGUGUAAACUGAGC.....     | 59  |
| .....CUUGUCCGACGGUGUAAACUGAGCU.....    | 72  |
| .....CUUGUCCGACGGUGUAAACUGAGCUU.....   | 66  |
| .....CUUGUCCGACGGUGUAAACUGAGCUUG.....  | 93  |
| .....CUUGUCCGACGGUGUAAACUGAGCUUGC..... | 13  |
| .....UUGUCCGACGGUGUAA.....             | 20  |
| .....UUGUCCGACGGUGUAAA.....            | 24  |
| .....UUGUCCGACGGUGUAAAC.....           | 20  |
| .....UUGUCCGACGGUGUAAACU.....          | 8   |
| .....UUGUCCGACGGUGUAAACUG.....         | 35  |
| .....UUGUCCGACGGUGUAAACUGA.....        | 21  |

|                                        |     |
|----------------------------------------|-----|
| .....UUGUCCGACGGUGUAAACUGAG.....       | 31  |
| .....UUGUCCGACGGUGUAAACUGAGC.....      | 33  |
| .....UUGUCCGACGGUGUAAACUGAGCU.....     | 16  |
| .....UUGUCCGACGGUGUAAACUGAGCUU.....    | 30  |
| .....UUGUCCGACGGUGUAAACUGAGCUUG.....   | 40  |
| .....UUGUCCGACGGUGUAAACUGAGCUUGC.....  | 12  |
| .....UGUCCGACGGUGUAAA.....             | 10  |
| .....UGUCCGACGGUGUAAAC.....            | 13  |
| .....UGUCCGACGGUGUAAACU.....           | 11  |
| .....UGUCCGACGGUGUAAACUG.....          | 13  |
| .....UGUCCGACGGUGUAAACUGA.....         | 17  |
| .....UGUCCGACGGUGUAAACUGAG.....        | 41  |
| .....UGUCCGACGGUGUAAACUGAGC.....       | 18  |
| .....UGUCCGACGGUGUAAACUGAGCU.....      | 35  |
| .....UGUCCGACGGUGUAAACUGAGCUU.....     | 21  |
| .....UGUCCGACGGUGUAAACUGAGCUUG.....    | 40  |
| .....UGUCCGACGGUGUAAACUGAGCUUGC.....   | 18  |
| .....UGUCCGACGGUGUAAACUGAGCUUGC.....   | 5   |
| .....UGUCCGACGGUGUAAACUGAGCUUGCUC..... | 15  |
| .....GUCCGACGGUGUAAAC.....             | 6   |
| .....GUCCGACGGUGUAAACU.....            | 4   |
| .....GUCCGACGGUGUAAACUG.....           | 5   |
| .....GUCCGACGGUGUAAACUGA.....          | 10  |
| .....GUCCGACGGUGUAAACUGAG.....         | 12  |
| .....GUCCGACGGUGUAAACUGAGC.....        | 12  |
| .....GUCCGACGGUGUAAACUGAGCU.....       | 9   |
| .....GUCCGACGGUGUAAACUGAGCUU.....      | 6   |
| .....GUCCGACGGUGUAAACUGAGCUUG.....     | 17  |
| .....GUCCGACGGUGUAAACUGAGCUUGC.....    | 14  |
| .....GUCCGACGGUGUAAACUGAGCUUGC.....    | 6   |
| .....GUCCGACGGUGUAAACUGAGCUUGCUC.....  | 25  |
| .....GUCCGACGGUGUAAACUGAGCUUGCUC.....  | 22  |
| .....UCCGACGGUGUAAACUG.....            | 4   |
| .....UCCGACGGUGUAAACUGA.....           | 4   |
| .....UCCGACGGUGUAAACUGAG.....          | 5   |
| .....UCCGACGGUGUAAACUGAGC.....         | 4   |
| .....UCCGACGGUGUAAACUGAGCUU.....       | 2   |
| .....UCCGACGGUGUAAACUGAGCUUG.....      | 5   |
| .....UCCGACGGUGUAAACUGAGCUUGC.....     | 6   |
| .....UCCGACGGUGUAAACUGAGCUUGC.....     | 11  |
| .....UCCGACGGUGUAAACUGAGCUUGCUC.....   | 32  |
| .....UCCGACGGUGUAAACUGAGCUUGCUC.....   | 36  |
| .....UCCGACGGUGUAAACUGAGCUUGCUCU.....  | 13  |
| .....CCGACGGUGUAAACUG.....             | 45  |
| .....CCGACGGUGUAAACUGA.....            | 197 |
| .....CCGACGGUGUAAACUGAG.....           | 511 |
| .....CCGACGGUGUAAACUGAGC.....          | 14  |

|                                        |     |
|----------------------------------------|-----|
| .....CCGACGGUGUAAACUGAGCU.....         | 12  |
| .....CCGACGGUGUAAACUGAGCUU.....        | 10  |
| .....CCGACGGUGUAAACUGAGCUUG.....       | 16  |
| .....CCGACGGUGUAAACUGAGCUUGC.....      | 23  |
| .....CCGACGGUGUAAACUGAGCUUGC.....      | 23  |
| .....CCGACGGUGUAAACUGAGCUUGCUC.....    | 142 |
| .....CCGACGGUGUAAACUGAGCUUGCUCU.....   | 287 |
| .....CCGACGGUGUAAACUGAGCUUGCUCUU.....  | 71  |
| .....CCGACGGUGUAAACUGAGCUUGCUCUUU..... | 21  |
| .....CGACGGUGUAAACUGA.....             | 65  |
| .....CGACGGUGUAAACUGAG.....            | 193 |
| .....CGACGGUGUAAACUGAGC.....           | 20  |
| .....CGACGGUGUAAACUGAGCU.....          | 16  |
| .....CGACGGUGUAAACUGAGCUU.....         | 11  |
| .....CGACGGUGUAAACUGAGCUUG.....        | 23  |
| .....CGACGGUGUAAACUGAGCUUGC.....       | 22  |
| .....CGACGGUGUAAACUGAGCUUGC.....       | 30  |
| .....CGACGGUGUAAACUGAGCUUGCUC.....     | 212 |
| .....CGACGGUGUAAACUGAGCUUGCUCU.....    | 456 |
| .....CGACGGUGUAAACUGAGCUUGCUCUU.....   | 214 |
| .....CGACGGUGUAAACUGAGCUUGCUCUUU.....  | 64  |
| .....GACGGUGUAAACUGAG.....             | 17  |
| .....GACGGUGUAAACUGAGC.....            | 16  |
| .....GACGGUGUAAACUGAGCU.....           | 13  |
| .....GACGGUGUAAACUGAGCUU.....          | 10  |
| .....GACGGUGUAAACUGAGCUUG.....         | 28  |
| .....GACGGUGUAAACUGAGCUUGC.....        | 36  |
| .....GACGGUGUAAACUGAGCUUGC.....        | 48  |
| .....GACGGUGUAAACUGAGCUUGCUC.....      | 273 |
| .....GACGGUGUAAACUGAGCUUGCUCU.....     | 622 |
| .....GACGGUGUAAACUGAGCUUGCUCUU.....    | 398 |
| .....GACGGUGUAAACUGAGCUUGCUCUUU.....   | 169 |
| .....GACGGUGUAAACUGAGCUUGCUCUUUU.....  | 9   |
| .....ACGGUGUAAACUGAGC.....             | 17  |
| .....ACGGUGUAAACUGAGCU.....            | 18  |
| .....ACGGUGUAAACUGAGCUU.....           | 18  |
| .....ACGGUGUAAACUGAGCUUG.....          | 57  |
| .....ACGGUGUAAACUGAGCUUGC.....         | 45  |
| .....ACGGUGUAAACUGAGCUUGC.....         | 84  |
| .....ACGGUGUAAACUGAGCUUGCUC.....       | 299 |
| .....ACGGUGUAAACUGAGCUUGCUCU.....      | 489 |
| .....ACGGUGUAAACUGAGCUUGCUCUU.....     | 310 |
| .....ACGGUGUAAACUGAGCUUGCUCUUU.....    | 130 |
| .....ACGGUGUAAACUGAGCUUGCUCUUUU.....   | 13  |
| .....CGGUGUAAACUGAGCU.....             | 11  |
| .....CGGUGUAAACUGAGCUU.....            | 5   |
| .....CGGUGUAAACUGAGCUUG.....           | 7   |

|                                     |       |
|-------------------------------------|-------|
| .....CGGUGUAAACUGAGCUUGC.....       | 23    |
| .....CGGUGUAAACUGAGCUUGC.....       | 50    |
| .....CGGUGUAAACUGAGCUUGCUC.....     | 235   |
| .....CGGUGUAAACUGAGCUUGCUCU.....    | 1162  |
| .....CGGUGUAAACUGAGCUUGCUCUU.....   | 111   |
| .....CGGUGUAAACUGAGCUUGCUCUUU.....  | 58    |
| .....CGGUGUAAACUGAGCUUGCUCUUUU..... | 10    |
| .....GGUGUAAACUGAGCUU.....          | 7     |
| .....GGUGUAAACUGAGCUUG.....         | 17    |
| .....GGUGUAAACUGAGCUUGC.....        | 11    |
| .....GGUGUAAACUGAGCUUGCUCU.....     | 18    |
| .....GGUGUAAACUGAGCUUGCUC.....      | 46    |
| .....GGUGUAAACUGAGCUUGCUCU.....     | 138   |
| .....GGUGUAAACUGAGCUUGCUCUU.....    | 113   |
| .....GGUGUAAACUGAGCUUGCUCUUU.....   | 198   |
| .....GGUGUAAACUGAGCUUGCUCUUUU.....  | 12    |
| .....GUGUAAACUGAGCUUG.....          | 72    |
| .....GUGUAAACUGAGCUUGC.....         | 22    |
| .....GUGUAAACUGAGCUUGCUCU.....      | 19    |
| .....GUGUAAACUGAGCUUGCUC.....       | 99    |
| .....GUGUAAACUGAGCUUGCUCU.....      | 164   |
| .....GUGUAAACUGAGCUUGCUCUU.....     | 175   |
| .....GUGUAAACUGAGCUUGCUCUUU.....    | 173   |
| .....GUGUAAACUGAGCUUGCUCUUUU.....   | 10    |
| .....UGUAAACUGAGCUUGC.....          | 133   |
| .....UGUAAACUGAGCUUGCUCU.....       | 150   |
| .....UGUAAACUGAGCUUGCUC.....        | 410   |
| .....UGUAAACUGAGCUUGCUCU.....       | 633   |
| .....UGUAAACUGAGCUUGCUCUU.....      | 4841  |
| .....UGUAAACUGAGCUUGCUCUUU.....     | 16387 |
| .....UGUAAACUGAGCUUGCUCUUUU.....    | 1732  |
| .....UGUAAACUGAGCUUGCUCUUUUU.....   | 94    |
| .....GUAACUGAGCUUGCUCU.....         | 36    |
| .....GUAACUGAGCUUGCUC.....          | 215   |
| .....GUAACUGAGCUUGCUCU.....         | 312   |
| .....GUAACUGAGCUUGCUCUU.....        | 263   |
| .....GUAACUGAGCUUGCUCUUU.....       | 590   |
| .....GUAACUGAGCUUGCUCUUUU.....      | 72    |
| .....GUAACUGAGCUUGCUCUUUUU.....     | 5     |
| .....UAAACUGAGCUUGCUC.....          | 57    |
| .....UAAACUGAGCUUGCUCU.....         | 96    |
| .....UAAACUGAGCUUGCUCUU.....        | 67    |
| .....UAAACUGAGCUUGCUCUUU.....       | 98    |
| .....UAAACUGAGCUUGCUCUUUU.....      | 13    |
| .....AAACUGAGCUUGCUCU.....          | 60    |
| .....AAACUGAGCUUGCUCUU.....         | 58    |
| .....AAACUGAGCUUGCUCUUU.....        | 133   |

|                           |     |
|---------------------------|-----|
| .....AAACUGAGCUUGCUCUUUU. | 13  |
| .....AACUGAGCUUGCUCUU.    | 71  |
| .....AACUGAGCUUGCUCUUU.   | 105 |
| .....AACUGAGCUUGCUCUUUU.  | 11  |
| .....ACUGAGCUUGCUCUUU.    | 95  |
| .....ACUGAGCUUGCUCUUUU.   | 8   |
| .....CUGAGCUUGCUCUUUU.    | 19  |
| .....CUGAGCUUGCUCUUUUU.   | 4   |
| .....UGAGCUUGCUCUUUUU.    | 2   |

**#shR-nccr5 dTTT**

|                                                           | Reads |
|-----------------------------------------------------------|-------|
| uugGAGCAAGCUCAGUUUACACCUUguccgacggUGUAAACUGAGCUUGCUCUUUuu |       |
| UUGGAGCAAGCUCAGUUUACAC.....                               | 2     |
| UUGGAGCAAGCUCAGUUUACACC.....                              | 6     |
| .UGGAGCAAGCUCAGUUUACAC.....                               | 3     |
| .UGGAGCAAGCUCAGUUUACACC.....                              | 5     |
| .GGAGCAAGCUCAGUUUA.....                                   | 6     |
| .GGAGCAAGCUCAGUUUAC.....                                  | 5     |
| .GGAGCAAGCUCAGUUUACA.....                                 | 4     |
| .GGAGCAAGCUCAGUUUACAC.....                                | 7     |
| .GGAGCAAGCUCAGUUUACACC.....                               | 80    |
| .GGAGCAAGCUCAGUUUACACCU.....                              | 14    |
| .GGAGCAAGCUCAGUUUACACCUU.....                             | 3     |
| .GGAGCAAGCUCAGUUUACACCUUG.....                            | 4     |
| .GGAGCAAGCUCAGUUUACACCUUGU.....                           | 2     |
| .GGAGCAAGCUCAGUUUACACCUUGUC.....                          | 2     |
| .GAGCAAGCUCAGUUUA.....                                    | 25    |
| .GAGCAAGCUCAGUUUAC.....                                   | 36    |
| .GAGCAAGCUCAGUUUACA.....                                  | 39    |
| .GAGCAAGCUCAGUUUACAC.....                                 | 117   |
| .GAGCAAGCUCAGUUUACACC.....                                | 493   |
| .GAGCAAGCUCAGUUUACACCU.....                               | 189   |
| .GAGCAAGCUCAGUUUACACCUU.....                              | 26    |
| .GAGCAAGCUCAGUUUACACCUUG.....                             | 122   |
| .GAGCAAGCUCAGUUUACACCUUGU.....                            | 31    |
| .GAGCAAGCUCAGUUUACACCUUGUC.....                           | 11    |
| .GAGCAAGCUCAGUUUACACCUUGUCC.....                          | 43    |
| .GAGCAAGCUCAGUUUACACCUUGUCCG.....                         | 5     |
| ...AGCAAGCUCAGUUUAC.....                                  | 68    |
| ...AGCAAGCUCAGUUUACA.....                                 | 91    |
| ...AGCAAGCUCAGUUUACAC.....                                | 147   |
| ...AGCAAGCUCAGUUUACACC.....                               | 406   |
| ...AGCAAGCUCAGUUUACACCU.....                              | 907   |
| ...AGCAAGCUCAGUUUACACCUU.....                             | 231   |
| ...AGCAAGCUCAGUUUACACCUUG.....                            | 557   |
| ...AGCAAGCUCAGUUUACACCUUGU.....                           | 187   |
| ...AGCAAGCUCAGUUUACACCUUGUC.....                          | 82    |

|                                        |      |
|----------------------------------------|------|
| ....AGCAAGCUCAGUUUACACCUUGUCC.....     | 143  |
| ....AGCAAGCUCAGUUUACACCUUGUCCG.....    | 69   |
| ....AGCAAGCUCAGUUUACACCUUGUCCGA.....   | 225  |
| ....AGCAAGCUCAGUUUACACCUUGUCCGAC.....  | 3    |
| .....GCAAGCUCAGUUUACA.....             | 91   |
| .....GCAAGCUCAGUUUACAC.....            | 217  |
| .....GCAAGCUCAGUUUACACC.....           | 714  |
| .....GCAAGCUCAGUUUACACCU.....          | 2317 |
| .....GCAAGCUCAGUUUACACCUU.....         | 304  |
| .....GCAAGCUCAGUUUACACCUUG.....        | 1339 |
| .....GCAAGCUCAGUUUACACCUUGU.....       | 83   |
| .....GCAAGCUCAGUUUACACCUUGUC.....      | 53   |
| .....GCAAGCUCAGUUUACACCUUGUCC.....     | 95   |
| .....GCAAGCUCAGUUUACACCUUGUCCG.....    | 38   |
| .....GCAAGCUCAGUUUACACCUUGUCCGA.....   | 18   |
| .....GCAAGCUCAGUUUACACCUUGUCCGAC.....  | 5    |
| .....GCAAGCUCAGUUUACACCUUGUCCGACG..... | 4    |
| .....CAAGCUCAGUUUACAC.....             | 2    |
| .....CAAGCUCAGUUUACACC.....            | 18   |
| .....CAAGCUCAGUUUACACCU.....           | 15   |
| .....CAAGCUCAGUUUACACCUU.....          | 4    |
| .....CAAGCUCAGUUUACACCUUG.....         | 5    |
| .....CAAGCUCAGUUUACACCUUGU.....        | 4    |
| .....CAAGCUCAGUUUACACCUUGUC.....       | 4    |
| .....CAAGCUCAGUUUACACCUUGUCCG.....     | 2    |
| .....CAAGCUCAGUUUACACCUUGUCCGA.....    | 2    |
| .....AAGCUCAGUUUACACC.....             | 482  |
| .....AAGCUCAGUUUACACCU.....            | 1071 |
| .....AAGCUCAGUUUACACCUU.....           | 139  |
| .....AAGCUCAGUUUACACCUUG.....          | 430  |
| .....AAGCUCAGUUUACACCUUGU.....         | 61   |
| .....AAGCUCAGUUUACACCUUGUC.....        | 32   |
| .....AAGCUCAGUUUACACCUUGUCC.....       | 71   |
| .....AAGCUCAGUUUACACCUUGUCCG.....      | 39   |
| .....AAGCUCAGUUUACACCUUGUCCGA.....     | 154  |
| .....AAGCUCAGUUUACACCUUGUCCGAC.....    | 111  |
| .....AAGCUCAGUUUACACCUUGUCCGACG.....   | 125  |
| .....AAGCUCAGUUUACACCUUGUCCGACGG.....  | 9    |
| .....AAGCUCAGUUUACACCUUGUCCGACGGU..... | 3    |
| .....AGCUCAGUUUACACCU.....             | 90   |
| .....AGCUCAGUUUACACCUU.....            | 21   |
| .....AGCUCAGUUUACACCUUG.....           | 36   |
| .....AGCUCAGUUUACACCUUGU.....          | 30   |
| .....AGCUCAGUUUACACCUUGUC.....         | 4    |
| .....AGCUCAGUUUACACCUUGUCC.....        | 2    |
| .....AGCUCAGUUUACACCUUGUCCG.....       | 3    |
| .....AGCUCAGUUUACACCUUGUCCGA.....      | 3    |

|                                        |    |
|----------------------------------------|----|
| .....AGCUCAGUUUACACCUUGUCCGAC.....     | 2  |
| .....AGCUCAGUUUACACCUUGUCCGACG.....    | 3  |
| .....GCUCAGUUUACACCUU.....             | 4  |
| .....GCUCAGUUUACACCUUG.....            | 34 |
| .....GCUCAGUUUACACCUUGU.....           | 2  |
| .....GCUCAGUUUACACCUUGUCCGA.....       | 4  |
| .....GCUCAGUUUACACCUUGUCCGACGG.....    | 2  |
| .....CUCAGUUUACACCUUG.....             | 56 |
| .....CUCAGUUUACACCUUGU.....            | 6  |
| .....CUCAGUUUACACCUUGUC.....           | 3  |
| .....CUCAGUUUACACCUUGUCC.....          | 3  |
| .....CUCAGUUUACACCUUGUCCG.....         | 3  |
| .....CUCAGUUUACACCUUGUCCGA.....        | 3  |
| .....CUCAGUUUACACCUUGUCCGAC.....       | 2  |
| .....CUCAGUUUACACCUUGUCCGACG.....      | 4  |
| .....CUCAGUUUACACCUUGUCCGACGG.....     | 5  |
| .....CUCAGUUUACACCUUGUCCGACGGUG.....   | 3  |
| .....CUCAGUUUACACCUUGUCCGACGGUGU.....  | 3  |
| .....UCAGUUUACACCUUGU.....             | 3  |
| .....UCAGUUUACACCUUGUCCG.....          | 3  |
| .....UCAGUUUACACCUUGUCCGAC.....        | 2  |
| .....UCAGUUUACACCUUGUCCGACG.....       | 3  |
| .....UCAGUUUACACCUUGUCCGACGG.....      | 10 |
| .....UCAGUUUACACCUUGUCCGACGGU.....     | 4  |
| .....UCAGUUUACACCUUGUCCGACGGUG.....    | 5  |
| .....UCAGUUUACACCUUGUCCGACGGUGU.....   | 9  |
| .....CAGUUUACACCUUGUCC.....            | 3  |
| .....CAGUUUACACCUUGUCCG.....           | 2  |
| .....CAGUUUACACCUUGUCCGA.....          | 6  |
| .....CAGUUUACACCUUGUCCGAC.....         | 6  |
| .....CAGUUUACACCUUGUCCGACG.....        | 8  |
| .....CAGUUUACACCUUGUCCGACGG.....       | 3  |
| .....CAGUUUACACCUUGUCCGACGGUG.....     | 3  |
| .....CAGUUUACACCUUGUCCGACGGUGU.....    | 4  |
| .....CAGUUUACACCUUGUCCGACGGUGUA.....   | 9  |
| .....CAGUUUACACCUUGUCCGACGGUGUAAA..... | 4  |
| .....AGUUUACACCUUGUCC.....             | 5  |
| .....AGUUUACACCUUGUCCGA.....           | 2  |
| .....AGUUUACACCUUGUCCGACG.....         | 5  |
| .....AGUUUACACCUUGUCCGACGG.....        | 4  |
| .....AGUUUACACCUUGUCCGACGGUG.....      | 3  |
| .....AGUUUACACCUUGUCCGACGGUGU.....     | 4  |
| .....AGUUUACACCUUGUCCGACGGUGUA.....    | 4  |
| .....AGUUUACACCUUGUCCGACGGUGUAAA.....  | 2  |
| .....GUUUACACCUUGUCCGA.....            | 2  |
| .....GUUUACACCUUGUCCGAC.....           | 2  |
| .....GUUUACACCUUGUCCGACG.....          | 3  |

|                                      |    |
|--------------------------------------|----|
| .....GUUUACACCUUGUCCGACGG.....       | 5  |
| .....GUUUACACCUUGUCCGACGGU.....      | 3  |
| .....GUUUACACCUUGUCCGACGGUG.....     | 5  |
| .....GUUUACACCUUGUCCGACGGUGU.....    | 6  |
| .....GUUUACACCUUGUCCGACGGUGUA.....   | 5  |
| .....GUUUACACCUUGUCCGACGGUGUAA.....  | 2  |
| .....UUUACACCUUGUCCGAC.....          | 3  |
| .....UUUACACCUUGUCCGACG.....         | 5  |
| .....UUUACACCUUGUCCGACGG.....        | 7  |
| .....UUUACACCUUGUCCGACGGU.....       | 2  |
| .....UUUACACCUUGUCCGACGGUG.....      | 2  |
| .....UUUACACCUUGUCCGACGGUGU.....     | 9  |
| .....UUUACACCUUGUCCGACGGUGUA.....    | 6  |
| .....UUACACCUUGUCCGAC.....           | 6  |
| .....UUACACCUUGUCCGACG.....          | 5  |
| .....UUACACCUUGUCCGACGG.....         | 5  |
| .....UUACACCUUGUCCGACGGUGU.....      | 6  |
| .....UUACACCUUGUCCGACGGUGUA.....     | 2  |
| .....UUACACCUUGUCCGACGGUGUAAAC.....  | 11 |
| .....UUACACCUUGUCCGACGGUGUAAACU..... | 2  |
| .....UACACCUUGUCCGACG.....           | 6  |
| .....UACACCUUGUCCGACGG.....          | 15 |
| .....UACACCUUGUCCGACGGU.....         | 4  |
| .....UACACCUUGUCCGACGGUG.....        | 2  |
| .....UACACCUUGUCCGACGGUGU.....       | 13 |
| .....UACACCUUGUCCGACGGUGUAAA.....    | 9  |
| .....UACACCUUGUCCGACGGUGUAAAC.....   | 5  |
| .....ACACCUUGUCCGACGG.....           | 6  |
| .....ACACCUUGUCCGACGGU.....          | 3  |
| .....ACACCUUGUCCGACGGUG.....         | 4  |
| .....ACACCUUGUCCGACGGUGUAA.....      | 3  |
| .....ACACCUUGUCCGACGGUGUAAAC.....    | 2  |
| .....CACCUUGUCCGACGGU.....           | 16 |
| .....CACCUUGUCCGACGGUGU.....         | 3  |
| .....CACCUUGUCCGACGGUGUA.....        | 22 |
| .....CACCUUGUCCGACGGUGUAA.....       | 5  |
| .....CACCUUGUCCGACGGUGUAAA.....      | 15 |
| .....CACCUUGUCCGACGGUGUAAAC.....     | 7  |
| .....CACCUUGUCCGACGGUGUAAACU.....    | 2  |
| .....CACCUUGUCCGACGGUGUAAACUGA.....  | 8  |
| .....CACCUUGUCCGACGGUGUAAACUGAG..... | 5  |
| .....ACCUUGUCCGACGGUG.....           | 15 |
| .....ACCUUGUCCGACGGUGU.....          | 22 |
| .....ACCUUGUCCGACGGUGUA.....         | 20 |
| .....ACCUUGUCCGACGGUGUAA.....        | 4  |
| .....ACCUUGUCCGACGGUGUAAA.....       | 28 |
| .....ACCUUGUCCGACGGUGUAAAC.....      | 19 |



|                                        |    |
|----------------------------------------|----|
| .....ACCUUGUCCGACGGUGUAAACU.....       | 4  |
| .....ACCUUGUCCGACGGUGUAAACUG.....      | 12 |
| .....ACCUUGUCCGACGGUGUAAACUGA.....     | 7  |
| .....ACCUUGUCCGACGGUGUAAACUGAG.....    | 21 |
| .....ACCUUGUCCGACGGUGUAAACUGAGC.....   | 4  |
| .....ACCUUGUCCGACGGUGUAAACUGAGCU.....  | 6  |
| .....ACCUUGUCCGACGGUGUAAACUGAGCUU..... | 2  |
| .....CCUUGUCCGACGGUGU.....             | 11 |
| .....CCUUGUCCGACGGUGUA.....            | 39 |
| .....CCUUGUCCGACGGUGUAA.....           | 6  |
| .....CCUUGUCCGACGGUGUAAA.....          | 28 |
| .....CCUUGUCCGACGGUGUAAAC.....         | 28 |
| .....CCUUGUCCGACGGUGUAAACU.....        | 5  |
| .....CCUUGUCCGACGGUGUAAACUG.....       | 39 |
| .....CCUUGUCCGACGGUGUAAACUGA.....      | 21 |
| .....CCUUGUCCGACGGUGUAAACUGAG.....     | 54 |
| .....CCUUGUCCGACGGUGUAAACUGAGC.....    | 21 |
| .....CCUUGUCCGACGGUGUAAACUGAGCU.....   | 22 |
| .....CCUUGUCCGACGGUGUAAACUGAGCUU.....  | 11 |
| .....CCUUGUCCGACGGUGUAAACUGAGCUUG..... | 6  |
| .....CUUGUCCGACGGUGUA.....             | 23 |
| .....CUUGUCCGACGGUGUAA.....            | 10 |
| .....CUUGUCCGACGGUGUAAA.....           | 40 |
| .....CUUGUCCGACGGUGUAAAC.....          | 22 |
| .....CUUGUCCGACGGUGUAAACU.....         | 12 |
| .....CUUGUCCGACGGUGUAAACUG.....        | 35 |
| .....CUUGUCCGACGGUGUAAACUGA.....       | 34 |
| .....CUUGUCCGACGGUGUAAACUGAG.....      | 88 |
| .....CUUGUCCGACGGUGUAAACUGAGC.....     | 39 |
| .....CUUGUCCGACGGUGUAAACUGAGCU.....    | 56 |
| .....CUUGUCCGACGGUGUAAACUGAGCUU.....   | 36 |
| .....CUUGUCCGACGGUGUAAACUGAGCUUG.....  | 26 |
| .....CUUGUCCGACGGUGUAAACUGAGCUUGC..... | 9  |
| .....UUGUCCGACGGUGUAA.....             | 6  |
| .....UUGUCCGACGGUGUAAA.....            | 9  |
| .....UUGUCCGACGGUGUAAAC.....           | 10 |
| .....UUGUCCGACGGUGUAAACU.....          | 6  |
| .....UUGUCCGACGGUGUAAACUG.....         | 10 |
| .....UUGUCCGACGGUGUAAACUGA.....        | 21 |
| .....UUGUCCGACGGUGUAAACUGAG.....       | 33 |
| .....UUGUCCGACGGUGUAAACUGAGC.....      | 23 |
| .....UUGUCCGACGGUGUAAACUGAGCU.....     | 19 |
| .....UUGUCCGACGGUGUAAACUGAGCUU.....    | 14 |
| .....UUGUCCGACGGUGUAAACUGAGCUUG.....   | 14 |
| .....UUGUCCGACGGUGUAAACUGAGCUUGC.....  | 11 |
| .....UUGUCCGACGGUGUAAACUGAGCUUGC.....  | 4  |
| .....UGUCCGACGGUGUAAA.....             | 9  |

|                                        |     |
|----------------------------------------|-----|
| .....UGUCCGACGGUGUAAAC.....            | 10  |
| .....UGUCCGACGGUGUAAACU.....           | 10  |
| .....UGUCCGACGGUGUAAACUG.....          | 9   |
| .....UGUCCGACGGUGUAAACUGA.....         | 14  |
| .....UGUCCGACGGUGUAAACUGAG.....        | 26  |
| .....UGUCCGACGGUGUAAACUGAGC.....       | 15  |
| .....UGUCCGACGGUGUAAACUGAGCU.....      | 17  |
| .....UGUCCGACGGUGUAAACUGAGCUU.....     | 16  |
| .....UGUCCGACGGUGUAAACUGAGCUUG.....    | 22  |
| .....UGUCCGACGGUGUAAACUGAGCUUGC.....   | 20  |
| .....UGUCCGACGGUGUAAACUGAGCUUGC.....   | 7   |
| .....UGUCCGACGGUGUAAACUGAGCUUGCUC..... | 12  |
| .....GUCCGACGGUGUAAACU.....            | 3   |
| .....GUCCGACGGUGUAAACUG.....           | 2   |
| .....GUCCGACGGUGUAAACUGA.....          | 5   |
| .....GUCCGACGGUGUAAACUGAG.....         | 4   |
| .....GUCCGACGGUGUAAACUGAGCU.....       | 4   |
| .....GUCCGACGGUGUAAACUGAGCUUG.....     | 2   |
| .....GUCCGACGGUGUAAACUGAGCUUGC.....    | 15  |
| .....GUCCGACGGUGUAAACUGAGCUUGC.....    | 11  |
| .....GUCCGACGGUGUAAACUGAGCUUGCUC.....  | 26  |
| .....GUCCGACGGUGUAAACUGAGCUUGCUCU..... | 14  |
| .....UCCGACGGUGUAAACU.....             | 2   |
| .....UCCGACGGUGUAAACUG.....            | 4   |
| .....UCCGACGGUGUAAACUGA.....           | 5   |
| .....UCCGACGGUGUAAACUGAGC.....         | 3   |
| .....UCCGACGGUGUAAACUGAGCU.....        | 3   |
| .....UCCGACGGUGUAAACUGAGCUUGC.....     | 21  |
| .....UCCGACGGUGUAAACUGAGCUUGC.....     | 9   |
| .....UCCGACGGUGUAAACUGAGCUUGCUC.....   | 34  |
| .....UCCGACGGUGUAAACUGAGCUUGCUCU.....  | 20  |
| .....UCCGACGGUGUAAACUGAGCUUGCUCUU..... | 5   |
| .....CCGACGGUGUAAACUG.....             | 25  |
| .....CCGACGGUGUAAACUGA.....            | 142 |
| .....CCGACGGUGUAAACUGAG.....           | 233 |
| .....CCGACGGUGUAAACUGAGC.....          | 8   |
| .....CCGACGGUGUAAACUGAGCU.....         | 3   |
| .....CCGACGGUGUAAACUGAGCUU.....        | 4   |
| .....CCGACGGUGUAAACUGAGCUUG.....       | 5   |
| .....CCGACGGUGUAAACUGAGCUUGC.....      | 31  |
| .....CCGACGGUGUAAACUGAGCUUGC.....      | 27  |
| .....CCGACGGUGUAAACUGAGCUUGCUC.....    | 106 |
| .....CCGACGGUGUAAACUGAGCUUGCUCU.....   | 151 |
| .....CCGACGGUGUAAACUGAGCUUGCUCUU.....  | 22  |
| .....CCGACGGUGUAAACUGAGCUUGCUCUUU..... | 12  |
| .....CGACGGUGUAAACUGA.....             | 52  |
| .....CGACGGUGUAAACUGAG.....            | 125 |

|                                        |      |
|----------------------------------------|------|
| .....CGACGGUGUAAACUGAGC.....           | 6    |
| .....CGACGGUGUAAACUGAGCU.....          | 4    |
| .....CGACGGUGUAAACUGAGCUU.....         | 7    |
| .....CGACGGUGUAAACUGAGCUUG.....        | 12   |
| .....CGACGGUGUAAACUGAGCUUGC.....       | 59   |
| .....CGACGGUGUAAACUGAGCUUGC.....       | 33   |
| .....CGACGGUGUAAACUGAGCUUGCUC.....     | 213  |
| .....CGACGGUGUAAACUGAGCUUGCUCU.....    | 313  |
| .....CGACGGUGUAAACUGAGCUUGCUCUU.....   | 64   |
| .....CGACGGUGUAAACUGAGCUUGCUCUUU.....  | 50   |
| .....CGACGGUGUAAACUGAGCUUGCUCUUUU..... | 3    |
| .....GACGGUGUAAACUGAG.....             | 13   |
| .....GACGGUGUAAACUGAGC.....            | 3    |
| .....GACGGUGUAAACUGAGCU.....           | 12   |
| .....GACGGUGUAAACUGAGCUU.....          | 8    |
| .....GACGGUGUAAACUGAGCUUG.....         | 20   |
| .....GACGGUGUAAACUGAGCUUGC.....        | 60   |
| .....GACGGUGUAAACUGAGCUUGC.....        | 51   |
| .....GACGGUGUAAACUGAGCUUGCUC.....      | 256  |
| .....GACGGUGUAAACUGAGCUUGCUCU.....     | 397  |
| .....GACGGUGUAAACUGAGCUUGCUCUU.....    | 128  |
| .....GACGGUGUAAACUGAGCUUGCUCUUU.....   | 123  |
| .....GACGGUGUAAACUGAGCUUGCUCUUUU.....  | 3    |
| .....ACGGUGUAAACUGAGC.....             | 7    |
| .....ACGGUGUAAACUGAGCU.....            | 10   |
| .....ACGGUGUAAACUGAGCUU.....           | 12   |
| .....ACGGUGUAAACUGAGCUUG.....          | 25   |
| .....ACGGUGUAAACUGAGCUUGC.....         | 98   |
| .....ACGGUGUAAACUGAGCUUGC.....         | 86   |
| .....ACGGUGUAAACUGAGCUUGCUC.....       | 233  |
| .....ACGGUGUAAACUGAGCUUGCUCU.....      | 212  |
| .....ACGGUGUAAACUGAGCUUGCUCUU.....     | 83   |
| .....ACGGUGUAAACUGAGCUUGCUCUUU.....    | 140  |
| .....ACGGUGUAAACUGAGCUUGCUCUUUU.....   | 10   |
| .....ACGGUGUAAACUGAGCUUGCUCUUUUU.....  | 2    |
| .....CGGUGUAAACUGAGCU.....             | 8    |
| .....CGGUGUAAACUGAGCUU.....            | 6    |
| .....CGGUGUAAACUGAGCUUG.....           | 18   |
| .....CGGUGUAAACUGAGCUUGC.....          | 39   |
| .....CGGUGUAAACUGAGCUUGC.....          | 41   |
| .....CGGUGUAAACUGAGCUUGCUC.....        | 238  |
| .....CGGUGUAAACUGAGCUUGCUCU.....       | 2010 |
| .....CGGUGUAAACUGAGCUUGCUCUU.....      | 56   |
| .....CGGUGUAAACUGAGCUUGCUCUUU.....     | 48   |
| .....CGGUGUAAACUGAGCUUGCUCUUUU.....    | 8    |
| .....GGUGUAAACUGAGCUU.....             | 2    |
| .....GGUGUAAACUGAGCUUG.....            | 14   |

|                                    |      |
|------------------------------------|------|
| .....GGUGUAAACUGAGCUUGC.....       | 18   |
| .....GGUGUAAACUGAGCUUGC.....       | 14   |
| .....GGUGUAAACUGAGCUUGCUC.....     | 33   |
| .....GGUGUAAACUGAGCUUGCUCU.....    | 69   |
| .....GGUGUAAACUGAGCUUGCUCUU.....   | 41   |
| .....GGUGUAAACUGAGCUUGCUCUUU.....  | 59   |
| .....GGUGUAAACUGAGCUUGCUCUUUU..... | 10   |
| .....GUGUAAACUGAGCUUG.....         | 20   |
| .....GUGUAAACUGAGCUUGC.....        | 18   |
| .....GUGUAAACUGAGCUUGC.....        | 22   |
| .....GUGUAAACUGAGCUUGCUC.....      | 49   |
| .....GUGUAAACUGAGCUUGCUCU.....     | 105  |
| .....GUGUAAACUGAGCUUGCUCUU.....    | 76   |
| .....GUGUAAACUGAGCUUGCUCUUU.....   | 81   |
| .....GUGUAAACUGAGCUUGCUCUUUU.....  | 6    |
| .....UGUAAACUGAGCUUGC.....         | 67   |
| .....UGUAAACUGAGCUUGC.....         | 58   |
| .....UGUAAACUGAGCUUGCUC.....       | 170  |
| .....UGUAAACUGAGCUUGCUCU.....      | 338  |
| .....UGUAAACUGAGCUUGCUCUU.....     | 2077 |
| .....UGUAAACUGAGCUUGCUCUUU.....    | 7721 |
| .....UGUAAACUGAGCUUGCUCUUUU.....   | 1027 |
| .....UGUAAACUGAGCUUGCUCUUUUU.....  | 40   |
| .....GUAACUGAGCUUGC.....           | 38   |
| .....GUAACUGAGCUUGCUC.....         | 115  |
| .....GUAACUGAGCUUGCUCU.....        | 108  |
| .....GUAACUGAGCUUGCUCUU.....       | 88   |
| .....GUAACUGAGCUUGCUCUUU.....      | 296  |
| .....GUAACUGAGCUUGCUCUUUU.....     | 39   |
| .....GUAACUGAGCUUGCUCUUUUU.....    | 4    |
| .....UAAACUGAGCUUGCUC.....         | 36   |
| .....UAAACUGAGCUUGCUCU.....        | 45   |
| .....UAAACUGAGCUUGCUCUU.....       | 21   |
| .....UAAACUGAGCUUGCUCUUU.....      | 61   |
| .....UAAACUGAGCUUGCUCUUUU.....     | 7    |
| .....AAACUGAGCUUGCUCU.....         | 34   |
| .....AAACUGAGCUUGCUCUU.....        | 25   |
| .....AAACUGAGCUUGCUCUUU.....       | 73   |
| .....AAACUGAGCUUGCUCUUUU.....      | 11   |
| .....AACUGAGCUUGCUCUU.....         | 19   |
| .....AACUGAGCUUGCUCUUU.....        | 61   |
| .....AACUGAGCUUGCUCUUUU.....       | 4    |
| .....ACUGAGCUUGCUCUUU.....         | 51   |
| .....CUGAGCUUGCUCUUUU.....         | 7    |

#mU6 TI 1

UGAUAAUUUGUGGUAGUGGUUUUUUCGUA

Reads

|                               |    |
|-------------------------------|----|
| .GAUAAUUUGUGGUAGUGGUUUUU..... | 11 |
| .GAUAAUUUGUGGUAGUGGUUUUU..... | 29 |
| ..AUAAUUUGUGGUAGUGGUUUUU..... | 2  |
| ...UAAUUUGUGGUAGUGGUUUUU..... | 7  |

**#mU6 TI 2**

|                               |       |
|-------------------------------|-------|
| AGAUAAUUUGUGGUAGUGGUUUUUUCGUA | Reads |
| AGAUAAUUUGUGGUAGUGGU.....     | 4     |
| AGAUAAUUUGUGGUAGUGGUUU.....   | 5     |
| AGAUAAUUUGUGGUAGUGGUUUUU..... | 15    |
| AGAUAAUUUGUGGUAGUGGUUUUU..... | 63    |
| AGAUAAUUUGUGGUAGUGGUUUUUUC... | 4     |
| .GAUAAUUUGUGGUAGUGGUUU.....   | 2     |
| .GAUAAUUUGUGGUAGUGGUUUUU..... | 5     |
| .GAUAAUUUGUGGUAGUGGUUUUU..... | 3     |
| ..AUAAUUUGUGGUAGUGGUUUUU..... | 3     |
| ...UAAUUUGUGGUAGUGGUUUUU..... | 7     |

**#mU6 TI 3**

|                               |       |
|-------------------------------|-------|
| CGAUAAUUUGUGGUAGUGGUUUUUUCGUA | Reads |
| .GAUAAUUUGUGGUAGUGGU.....     | 2     |
| .GAUAAUUUGUGGUAGUGGUUU.....   | 2     |
| .GAUAAUUUGUGGUAGUGGUUUUU..... | 15    |
| .GAUAAUUUGUGGUAGUGGUUUUU..... | 26    |
| ..AUAAUUUGUGGUAGUGGUUU.....   | 3     |
| ..AUAAUUUGUGGUAGUGGUUUUU..... | 2     |
| ...UAAUUUGUGGUAGUGGUUUUU..... | 2     |
| ...UAAUUUGUGGUAGUGGUUUUU..... | 5     |

**#mU6 TI 4**

|                               |       |
|-------------------------------|-------|
| GGAUAAUUUGUGGUAGUGGUUUUUUCGUA | Reads |
| GGAUAAUUUGUGGUAGUGGU.....     | 4     |
| GGAUAAUUUGUGGUAGUGGUUU.....   | 3     |
| GGAUAAUUUGUGGUAGUGGUUUUU..... | 8     |
| GGAUAAUUUGUGGUAGUGGUUUUU..... | 30    |
| GGAUAAUUUGUGGUAGUGGUUUUU..... | 52    |
| GGAUAAUUUGUGGUAGUGGUUUUUUC... | 2     |
| .GAUAAUUUGUGGUAGUGGUUUUU..... | 3     |
| .GAUAAUUUGUGGUAGUGGUUUUU..... | 13    |
| ..AUAAUUUGUGGUAGUGGUUU.....   | 3     |
| ..AUAAUUUGUGGUAGUGGUUUUU..... | 3     |
| ..AUAAUUUGUGGUAGUGGUUUUU..... | 2     |
| ...UAAUUUGUGGUAGUGGUUUUU..... | 5     |

**#mU6 TI 5**

|                                |       |
|--------------------------------|-------|
| UUGAUAAUUUGUGGUAGUGGUUUUUUCGUA | Reads |
| ..GAUAAUUUGUGGUAGUGGU.....     | 3     |

|                                  |    |
|----------------------------------|----|
| ..GAUAAUUUGUGGUAGUGGUUUUU.....   | 6  |
| ..GAUAAUUUGUGGUAGUGGUUUUUUU..... | 26 |
| ...AUAAUUUGUGGUAGUGGUUUUUUCG..   | 2  |
| ...UAAUUUGUGGUAGUGGUUUUU.....    | 4  |
| ...UAAUUUGUGGUAGUGGUUUUUUU.....  | 3  |
| ...UAAUUUGUGGUAGUGGUUUUUUCGU.    | 2  |

**#mU6 TI 6**

|                                 |       |
|---------------------------------|-------|
| UAGAUAAUUUGUGGUAGUGGUUUUUUCGUA  | Reads |
| UAGAUAAUUUGUGGUAGUGGUUUUU.....  | 2     |
| .AGAUAAUUUGUGGUAGU.....         | 2     |
| .AGAUAAUUUGUGGUAGUGG.....       | 5     |
| .AGAUAAUUUGUGGUAGUGGU.....      | 2     |
| .AGAUAAUUUGUGGUAGUGGUUU.....    | 4     |
| .AGAUAAUUUGUGGUAGUGGUUUU.....   | 5     |
| .AGAUAAUUUGUGGUAGUGGUUUUU.....  | 43    |
| .AGAUAAUUUGUGGUAGUGGUUUUUUU.... | 82    |
| .AGAUAAUUUGUGGUAGUGGUUUUUUC...  | 13    |
| ..GAUAAUUUGUGGUAGUGGUUUU.....   | 2     |
| ..GAUAAUUUGUGGUAGUGGUUUUUUU.... | 7     |
| ...AUAAUUUGUGGUAGUGGUUUUUUU.... | 2     |
| ...UAAUUUGUGGUAGUGGUUUUUUU....  | 7     |

**#mU6 TI 7**

|                                 |       |
|---------------------------------|-------|
| UCGAUAAUUUGUGGUAGUGGUUUUUUCGUA  | Reads |
| ..GAUAAUUUGUGGUAGUGGUUU.....    | 2     |
| ..GAUAAUUUGUGGUAGUGGUUUUU.....  | 13    |
| ..GAUAAUUUGUGGUAGUGGUUUUU.....  | 12    |
| ..GAUAAUUUGUGGUAGUGGUUUUUUU.... | 33    |
| ...UAAUUUGUGGUAGUGGUUUUUUU....  | 6     |

**#mU6 TI 8**

|                                 |       |
|---------------------------------|-------|
| UGGAUAAUUUGUGGUAGUGGUUUUUUCGUA  | Reads |
| .GGAUAAUUUGUGGUAGUGGU.....      | 2     |
| .GGAUAAUUUGUGGUAGUGGUU.....     | 5     |
| .GGAUAAUUUGUGGUAGUGGUUU.....    | 3     |
| .GGAUAAUUUGUGGUAGUGGUUUU.....   | 11    |
| .GGAUAAUUUGUGGUAGUGGUUUUU.....  | 22    |
| .GGAUAAUUUGUGGUAGUGGUUUUUUU.... | 47    |
| ..GAUAAUUUGUGGUAGUGGUUUUUUU.... | 4     |
| ...UAAUUUGUGGUAGUGGUUUUUUU....  | 2     |

**#mU6 TI 9**

|                                 |       |
|---------------------------------|-------|
| UUUGAUAAUUUGUGGUAGUGGUUUUUUCGUA | Reads |
| ***GAUAAUUUGUGGUAGUGGUU*****    | 0     |

**#mU6 TI 10**

|                                 |       |
|---------------------------------|-------|
| UUAGAUAAUUUGUGGUAGUGGUUUUUUCGUA | Reads |
| ..AGAUAAUUUGUGGUAGUGG.....      | 2     |
| ..AGAUAAUUUGUGGUAGUGGUUUU.....  | 12    |
| ..AGAUAAUUUGUGGUAGUGGUUUUU..... | 19    |
| ..AGAUAAUUUGUGGUAGUGGUUUUUU.... | 32    |
| ..AGAUAAUUUGUGGUAGUGGUUUUUUC... | 3     |
| ...AUAUUUGUGGUAGUGGUUUU.....    | 2     |
| ...AUAUUUGUGGUAGUGGUUUUU.....   | 2     |

**#mU6 TI 11**

|                                 |       |
|---------------------------------|-------|
| UUCGAUAAUUUGUGGUAGUGGUUUUUUCGUA | Reads |
| ..CGAUAAUUUGUGGUAGUGGUUUUUU.... | 5     |
| ...GAUAAUUUGUGGUAGUGGUUUU.....  | 2     |

**#mU6 TI 12**

|                                 |       |
|---------------------------------|-------|
| UUGGAUAAUUUGUGGUAGUGGUUUUUUCGUA | Reads |
| ..GGAUAAUUUGUGGUAGUGGUUUU.....  | 5     |
| ..GGAUAAUUUGUGGUAGUGGUUUUU..... | 16    |
| ..GGAUAAUUUGUGGUAGUGGUUUUUU.... | 26    |
| ..GGAUAAUUUGUGGUAGUGGUUUUUUC... | 4     |
| ....UAAUUUGUGGUAGUGGUUUUUU....  | 3     |

**#mU6 TI 13**

|                                   |       |
|-----------------------------------|-------|
| UUUUAGAUAAUUUGUGGUAGUGGUUUUUUCGUA | Reads |
| ***GAUAAUUUGUGGUAGUGGUU*****      | 0     |

**#mU6 TI 14**

|                                  |       |
|----------------------------------|-------|
| UUUAGAUAAUUUGUGGUAGUGGUUUUUUCGUA | Reads |
| ..AGAUAAUUUGUGGUAGUGGUUUUUU....  | 4     |

**#mU6 TI 15**

|                                  |       |
|----------------------------------|-------|
| UUUCGAUAAUUUGUGGUAGUGGUUUUUUCGUA | Reads |
| ***GAUAAUUUGUGGUAGUGGUU*****     | 0     |

**#mU6 TI 16**

|                                  |       |
|----------------------------------|-------|
| UUUGGAUAAUUUGUGGUAGUGGUUUUUUCGUA | Reads |
| ...GGAUAAUUUGUGGUAGUGGUUUUUU.... | 4     |

**#shR-miR-451**

|                                                |       |
|------------------------------------------------|-------|
| UUAAACCGUUACCAUUACUGAGUUUAGUAAUGGUAAGGUUCUUUUU | Reads |
| .UAAACCGUUACCAUUACUGAGUUU.....                 | 3     |
| .UAAACCGUUACCAUUACUGAGUUUA.....                | 2     |
| ..AAACCGUUACCAUUAC.....                        | 37    |
| ..AAACCGUUACCAUUACU.....                       | 59    |
| ..AAACCGUUACCAUUACUG.....                      | 22    |
| ..AAACCGUUACCAUUACUGA.....                     | 47    |
| ..AAACCGUUACCAUUACUGAG.....                    | 134   |

|                                       |       |
|---------------------------------------|-------|
| ..AAACCGUUACCAUUACUGAGU.....          | 114   |
| ..AAACCGUUACCAUUACUGAGUU.....         | 351   |
| ..AAACCGUUACCAUUACUGAGUUU.....        | 14108 |
| ..AAACCGUUACCAUUACUGAGUUUA.....       | 5252  |
| ..AAACCGUUACCAUUACUGAGUUUAG.....      | 3737  |
| ..AAACCGUUACCAUUACUGAGUUUAGU.....     | 10231 |
| ..AAACCGUUACCAUUACUGAGUUUAGUA.....    | 351   |
| ...AACCGUUACCAUUACU.....              | 3     |
| ...AACCGUUACCAUUACUG.....             | 5     |
| ...AACCGUUACCAUUACUGA.....            | 4     |
| ...AACCGUUACCAUUACUGAG.....           | 10    |
| ...AACCGUUACCAUUACUGAGU.....          | 17    |
| ...AACCGUUACCAUUACUGAGUU.....         | 56    |
| ...AACCGUUACCAUUACUGAGUUU.....        | 102   |
| ...AACCGUUACCAUUACUGAGUUUA.....       | 35    |
| ...AACCGUUACCAUUACUGAGUUUAG.....      | 104   |
| ...AACCGUUACCAUUACUGAGUUUAGU.....     | 391   |
| ...AACCGUUACCAUUACUGAGUUUAGUA.....    | 17    |
| ...AACCGUUACCAUUACUGAGUUUAGUAA.....   | 20    |
| ....ACCGUUACCAUUACUG.....             | 10    |
| ....ACCGUUACCAUUACUGA.....            | 10    |
| ....ACCGUUACCAUUACUGAG.....           | 28    |
| ....ACCGUUACCAUUACUGAGU.....          | 22    |
| ....ACCGUUACCAUUACUGAGUU.....         | 37    |
| ....ACCGUUACCAUUACUGAGUUU.....        | 70    |
| ....ACCGUUACCAUUACUGAGUUUA.....       | 18    |
| ....ACCGUUACCAUUACUGAGUUUAG.....      | 54    |
| ....ACCGUUACCAUUACUGAGUUUAGU.....     | 191   |
| ....ACCGUUACCAUUACUGAGUUUAGUA.....    | 5     |
| ....ACCGUUACCAUUACUGAGUUUAGUAA.....   | 17    |
| ....ACCGUUACCAUUACUGAGUUUAGUAAU.....  | 138   |
| .....CCGUUACCAUUACUGA.....            | 25    |
| .....CCGUUACCAUUACUGAG.....           | 158   |
| .....CCGUUACCAUUACUGAGU.....          | 40    |
| .....CCGUUACCAUUACUGAGUU.....         | 80    |
| .....CCGUUACCAUUACUGAGUUU.....        | 51    |
| .....CCGUUACCAUUACUGAGUUUA.....       | 21    |
| .....CCGUUACCAUUACUGAGUUUAG.....      | 68    |
| .....CCGUUACCAUUACUGAGUUUAGU.....     | 129   |
| .....CCGUUACCAUUACUGAGUUUAGUA.....    | 11    |
| .....CCGUUACCAUUACUGAGUUUAGUAA.....   | 25    |
| .....CCGUUACCAUUACUGAGUUUAGUAAU.....  | 267   |
| .....CCGUUACCAUUACUGAGUUUAGUAAUG..... | 107   |
| .....CGUUACCAUUACUGAG.....            | 129   |
| .....CGUUACCAUUACUGAGU.....           | 58    |
| .....CGUUACCAUUACUGAGUU.....          | 117   |
| .....CGUUACCAUUACUGAGUUU.....         | 129   |



|                                       |      |
|---------------------------------------|------|
| .....CGUUACCAUUACUGAGUUUA.....        | 65   |
| .....CGUUACCAUUACUGAGUUUAG.....       | 229  |
| .....CGUUACCAUUACUGAGUUUAGU.....      | 399  |
| .....CGUUACCAUUACUGAGUUUAGUA.....     | 41   |
| .....CGUUACCAUUACUGAGUUUAGUAA.....    | 122  |
| .....CGUUACCAUUACUGAGUUUAGUAAU.....   | 1406 |
| .....CGUUACCAUUACUGAGUUUAGUAAUG.....  | 633  |
| .....CGUUACCAUUACUGAGUUUAGUAAUGG..... | 429  |
| .....GUUACCAUUACUGAGU.....            | 32   |
| .....GUUACCAUUACUGAGUU.....           | 67   |
| .....GUUACCAUUACUGAGUUU.....          | 118  |
| .....GUUACCAUUACUGAGUUUA.....         | 42   |
| .....GUUACCAUUACUGAGUUUAG.....        | 63   |
| .....GUUACCAUUACUGAGUUUAGU.....       | 180  |
| .....GUUACCAUUACUGAGUUUAGUA.....      | 12   |
| .....GUUACCAUUACUGAGUUUAGUAA.....     | 60   |
| .....GUUACCAUUACUGAGUUUAGUAAU.....    | 732  |
| .....GUUACCAUUACUGAGUUUAGUAAUG.....   | 210  |
| .....GUUACCAUUACUGAGUUUAGUAAUGG.....  | 231  |
| .....GUUACCAUUACUGAGUUUAGUAAUGGU..... | 171  |
| .....UUACCAUUACUGAGUU.....            | 13   |
| .....UUACCAUUACUGAGUUU.....           | 44   |
| .....UUACCAUUACUGAGUUUA.....          | 12   |
| .....UUACCAUUACUGAGUUUAG.....         | 21   |
| .....UUACCAUUACUGAGUUUAGU.....        | 47   |
| .....UUACCAUUACUGAGUUUAGUA.....       | 6    |
| .....UUACCAUUACUGAGUUUAGUAA.....      | 13   |
| .....UUACCAUUACUGAGUUUAGUAAU.....     | 143  |
| .....UUACCAUUACUGAGUUUAGUAAUG.....    | 36   |
| .....UUACCAUUACUGAGUUUAGUAAUGG.....   | 54   |
| .....UUACCAUUACUGAGUUUAGUAAUGGU.....  | 33   |
| .....UACCAUUACUGAGUUU.....            | 55   |
| .....UACCAUUACUGAGUUUA.....           | 14   |
| .....UACCAUUACUGAGUUUAG.....          | 33   |
| .....UACCAUUACUGAGUUUAGU.....         | 85   |
| .....UACCAUUACUGAGUUUAGUA.....        | 9    |
| .....UACCAUUACUGAGUUUAGUAA.....       | 26   |
| .....UACCAUUACUGAGUUUAGUAAU.....      | 199  |
| .....UACCAUUACUGAGUUUAGUAAUG.....     | 100  |
| .....UACCAUUACUGAGUUUAGUAAUGG.....    | 25   |
| .....UACCAUUACUGAGUUUAGUAAUGGU.....   | 21   |
| .....ACCAUUACUGAGUUUA.....            | 10   |
| .....ACCAUUACUGAGUUUAG.....           | 26   |
| .....ACCAUUACUGAGUUUAGU.....          | 74   |
| .....ACCAUUACUGAGUUUAGUAA.....        | 8    |
| .....ACCAUUACUGAGUUUAGUAAU.....       | 149  |
| .....ACCAUUACUGAGUUUAGUAAUG.....      | 16   |

|                                       |     |
|---------------------------------------|-----|
| .....CCAUUACUGAGUUUAG.....            | 26  |
| .....CCAUUACUGAGUUUAGU.....           | 48  |
| .....CCAUUACUGAGUUUAGUA.....          | 4   |
| .....CCAUUACUGAGUUUAGUAA.....         | 8   |
| .....CCAUUACUGAGUUUAGUAAU.....        | 36  |
| .....CCAUUACUGAGUUUAGUAAUG.....       | 2   |
| .....CAUUACUGAGUUUAGU.....            | 177 |
| .....CAUUACUGAGUUUAGUA.....           | 19  |
| .....CAUUACUGAGUUUAGUAA.....          | 31  |
| .....CAUUACUGAGUUUAGUAAU.....         | 101 |
| .....CAUUACUGAGUUUAGUAAUGG.....       | 5   |
| .....CAUUACUGAGUUUAGUAAUGGU.....      | 2   |
| .....AUUACUGAGUUUAGUA.....            | 35  |
| .....AUUACUGAGUUUAGUAA.....           | 36  |
| .....AUUACUGAGUUUAGUAAU.....          | 284 |
| .....AUUACUGAGUUUAGUAAUG.....         | 3   |
| .....AUUACUGAGUUUAGUAAUGG.....        | 3   |
| .....AUUACUGAGUUUAGUAAUGGUAUG.....    | 2   |
| .....UUACUGAGUUUAGUAA.....            | 11  |
| .....UUACUGAGUUUAGUAAU.....           | 37  |
| .....UUACUGAGUUUAGUAAUG.....          | 3   |
| .....UUACUGAGUUUAGUAAUGGU.....        | 4   |
| .....UACUGAGUUUAGUAAU.....            | 53  |
| .....UACUGAGUUUAGUAAUG.....           | 16  |
| .....UACUGAGUUUAGUAAUGG.....          | 12  |
| .....UACUGAGUUUAGUAAUGGU.....         | 8   |
| .....UACUGAGUUUAGUAAUGGUAUG.....      | 8   |
| .....UACUGAGUUUAGUAAUGGUAUGGUUC.....  | 2   |
| .....ACUGAGUUUAGUAAUG.....            | 12  |
| .....ACUGAGUUUAGUAAUGG.....           | 6   |
| .....ACUGAGUUUAGUAAUGGU.....          | 5   |
| .....ACUGAGUUUAGUAAUGGUAUG.....       | 14  |
| .....ACUGAGUUUAGUAAUGGUAUGG.....      | 5   |
| .....ACUGAGUUUAGUAAUGGUAUGGUUC.....   | 3   |
| .....ACUGAGUUUAGUAAUGGUAUGGUUCU.....  | 5   |
| .....CUGAGUUUAGUAAUGG.....            | 32  |
| .....CUGAGUUUAGUAAUGGU.....           | 13  |
| .....CUGAGUUUAGUAAUGGUAA.....         | 13  |
| .....CUGAGUUUAGUAAUGGUAAU.....        | 3   |
| .....CUGAGUUUAGUAAUGGUAAUG.....       | 39  |
| .....CUGAGUUUAGUAAUGGUAAUGG.....      | 130 |
| .....CUGAGUUUAGUAAUGGUAAUGGU.....     | 75  |
| .....CUGAGUUUAGUAAUGGUAAUGGUU.....    | 5   |
| .....CUGAGUUUAGUAAUGGUAAUGGUUC.....   | 30  |
| .....CUGAGUUUAGUAAUGGUAAUGGUUCU.....  | 31  |
| .....CUGAGUUUAGUAAUGGUAAUGGUUCUU..... | 10  |
| .....UGAGUUUAGUAAUGGU.....            | 14  |

|                                        |      |
|----------------------------------------|------|
| .....UGAGUUUAGUAAUGGUA.....            | 2    |
| .....UGAGUUUAGUAAUGGUA.....            | 18   |
| .....UGAGUUUAGUAAUGGUAUU.....          | 3    |
| .....UGAGUUUAGUAAUGGUA AUG.....        | 60   |
| .....UGAGUUUAGUAAUGGUA AUGG.....       | 55   |
| .....UGAGUUUAGUAAUGGUA AUGGU.....      | 28   |
| .....UGAGUUUAGUAAUGGUA AUGGUU.....     | 6    |
| .....UGAGUUUAGUAAUGGUA AUGGUUC.....    | 17   |
| .....UGAGUUUAGUAAUGGUA AUGGUUCU.....   | 63   |
| .....UGAGUUUAGUAAUGGUA AUGGUUCUU.....  | 36   |
| .....UGAGUUUAGUAAUGGUA AUGGUUCUUU..... | 121  |
| .....GAGUUUAGUAAUGGUA.....             | 9    |
| .....GAGUUUAGUAAUGGUA.....             | 18   |
| .....GAGUUUAGUAAUGGUAUU.....           | 10   |
| .....GAGUUUAGUAAUGGUA AUG.....         | 37   |
| .....GAGUUUAGUAAUGGUA AUGG.....        | 35   |
| .....GAGUUUAGUAAUGGUA AUGGU.....       | 14   |
| .....GAGUUUAGUAAUGGUA AUGGUU.....      | 9    |
| .....GAGUUUAGUAAUGGUA AUGGUUC.....     | 78   |
| .....GAGUUUAGUAAUGGUA AUGGUUCU.....    | 198  |
| .....GAGUUUAGUAAUGGUA AUGGUUCUU.....   | 170  |
| .....GAGUUUAGUAAUGGUA AUGGUUCUUU.....  | 720  |
| .....GAGUUUAGUAAUGGUA AUGGUUCUUUU..... | 230  |
| .....AGUUUAGUAAUGGUA.....              | 13   |
| .....AGUUUAGUAAUGGUAUU.....            | 12   |
| .....AGUUUAGUAAUGGUA AUG.....          | 20   |
| .....AGUUUAGUAAUGGUA AUGG.....         | 20   |
| .....AGUUUAGUAAUGGUA AUGGU.....        | 5    |
| .....AGUUUAGUAAUGGUA AUGGUU.....       | 7    |
| .....AGUUUAGUAAUGGUA AUGGUUC.....      | 48   |
| .....AGUUUAGUAAUGGUA AUGGUUCU.....     | 125  |
| .....AGUUUAGUAAUGGUA AUGGUUCUU.....    | 102  |
| .....AGUUUAGUAAUGGUA AUGGUUCUUU.....   | 417  |
| .....AGUUUAGUAAUGGUA AUGGUUCUUUU.....  | 160  |
| .....AGUUUAGUAAUGGUA AUGGUUCUUUUU..... | 48   |
| .....GUUUAGUAAUGGUAUU.....             | 5    |
| .....GUUUAGUAAUGGUA AUG.....           | 14   |
| .....GUUUAGUAAUGGUA AUGG.....          | 34   |
| .....GUUUAGUAAUGGUA AUGGU.....         | 9    |
| .....GUUUAGUAAUGGUA AUGGUU.....        | 14   |
| .....GUUUAGUAAUGGUA AUGGUUC.....       | 99   |
| .....GUUUAGUAAUGGUA AUGGUUCU.....      | 314  |
| .....GUUUAGUAAUGGUA AUGGUUCUU.....     | 254  |
| .....GUUUAGUAAUGGUA AUGGUUCUUU.....    | 1009 |
| .....GUUUAGUAAUGGUA AUGGUUCUUUU.....   | 407  |
| .....GUUUAGUAAUGGUA AUGGUUCUUUUU.....  | 116  |
| .....UUUAGUAAUGGUA AUG.....            | 10   |

|                                      |      |
|--------------------------------------|------|
| .....UUUAGUAAUGGUA AUGG.....         | 57   |
| .....UUUAGUAAUGGUA AUGGU.....        | 21   |
| .....UUUAGUAAUGGUA AUGGUU.....       | 19   |
| .....UUUAGUAAUGGUA AUGGUUC.....      | 135  |
| .....UUUAGUAAUGGUA AUGGUUCU.....     | 410  |
| .....UUUAGUAAUGGUA AUGGUUCUU.....    | 352  |
| .....UUUAGUAAUGGUA AUGGUUCUUU.....   | 1441 |
| .....UUUAGUAAUGGUA AUGGUUCUUUU.....  | 632  |
| .....UUUAGUAAUGGUA AUGGUUCUUUUU..... | 171  |
| .....UUAGUAAUGGUA AUGG.....          | 41   |
| .....UUAGUAAUGGUA AUGGU.....         | 24   |
| .....UUAGUAAUGGUA AUGGUU.....        | 21   |
| .....UUAGUAAUGGUA AUGGUUC.....       | 220  |
| .....UUAGUAAUGGUA AUGGUUCU.....      | 560  |
| .....UUAGUAAUGGUA AUGGUUCUU.....     | 559  |
| .....UUAGUAAUGGUA AUGGUUCUUU.....    | 2069 |
| .....UUAGUAAUGGUA AUGGUUCUUUU.....   | 900  |
| .....UUAGUAAUGGUA AUGGUUCUUUUU.....  | 271  |
| .....UAGUAAUGGUA AUGGU.....          | 19   |
| .....UAGUAAUGGUA AUGGUU.....         | 14   |
| .....UAGUAAUGGUA AUGGUUC.....        | 120  |
| .....UAGUAAUGGUA AUGGUUCU.....       | 257  |
| .....UAGUAAUGGUA AUGGUUCUU.....      | 201  |
| .....UAGUAAUGGUA AUGGUUCUUU.....     | 750  |
| .....UAGUAAUGGUA AUGGUUCUUUU.....    | 316  |
| .....UAGUAAUGGUA AUGGUUCUUUUU.....   | 92   |
| .....AGUAAUGGUA AUGGU.....           | 10   |
| .....AGUAAUGGUA AUGGUUC.....         | 68   |
| .....AGUAAUGGUA AUGGUUCU.....        | 94   |
| .....AGUAAUGGUA AUGGUUCUU.....       | 79   |
| .....AGUAAUGGUA AUGGUUCUUU.....      | 220  |
| .....AGUAAUGGUA AUGGUUCUUUU.....     | 83   |
| .....AGUAAUGGUA AUGGUUCUUUUU.....    | 27   |
| .....GUAAUGGUA AUGGUUC.....          | 29   |
| .....GUAAUGGUA AUGGUUCU.....         | 43   |
| .....GUAAUGGUA AUGGUUCUU.....        | 49   |
| .....GUAAUGGUA AUGGUUCUUU.....       | 154  |
| .....GUAAUGGUA AUGGUUCUUUU.....      | 65   |
| .....GUAAUGGUA AUGGUUCUUUUU.....     | 19   |
| .....UAAUGGUA AUGGUUCU.....          | 29   |
| .....UAAUGGUA AUGGUUCUU.....         | 31   |
| .....UAAUGGUA AUGGUUCUUU.....        | 84   |
| .....UAAUGGUA AUGGUUCUUUU.....       | 37   |
| .....UAAUGGUA AUGGUUCUUUUU.....      | 12   |
| .....AAUGGUA AUGGUUCU.....           | 30   |
| .....AAUGGUA AUGGUUCUUU.....         | 118  |
| .....AAUGGUA AUGGUUCUUUU.....        | 39   |

|                          |    |
|--------------------------|----|
| .....AAUGGUA AUGGUUCUUUU | 25 |
| .....AUGGUA AUGGUUCUU..  | 53 |
| .....AUGGUA AUGGUUCUUUU. | 23 |
| .....AUGGUA AUGGUUCUUUUU | 8  |
| .....UGGUA AUGGUUCUUUU.  | 6  |
| .....GGUA AUGGUUCUUUUU   | 9  |

**#shR-miR-31**

|                                                                 | Reads |
|-----------------------------------------------------------------|-------|
| UAGGCAAGAUGCUGGCAUAGCUGUUGAACUGGGAACCUGCUAUGCCAACAUAUUGCCAUUUUU |       |
| UAGGCAAGAUGCUGGCAUAGC.....                                      | 3     |
| UAGGCAAGAUGCUGGCAUAGCU.....                                     | 2     |
| UAGGCAAGAUGCUGGCAUAGCUG.....                                    | 5     |
| .AGGCAAGAUGCUGGCA.....                                          | 3     |
| .AGGCAAGAUGCUGGCAUA.....                                        | 3     |
| .AGGCAAGAUGCUGGCAUAG.....                                       | 22    |
| .AGGCAAGAUGCUGGCAUAGC.....                                      | 495   |
| .AGGCAAGAUGCUGGCAUAGCU.....                                     | 527   |
| .AGGCAAGAUGCUGGCAUAGCUG.....                                    | 528   |
| .AGGCAAGAUGCUGGCAUAGCUGU.....                                   | 960   |
| .AGGCAAGAUGCUGGCAUAGCUGUU.....                                  | 81    |
| .AGGCAAGAUGCUGGCAUAGCUGUUG.....                                 | 2     |
| ..GGCAAGAUGCUGGCAUAGC.....                                      | 20    |
| ..GGCAAGAUGCUGGCAUAGCU.....                                     | 9     |
| ..GGCAAGAUGCUGGCAUAGCUG.....                                    | 14    |
| ..GGCAAGAUGCUGGCAUAGCUGU.....                                   | 19    |
| ..GGCAAGAUGCUGGCAUAGCUGUU.....                                  | 3     |
| ...GCAAGAUGCUGGCAUAGC.....                                      | 8     |
| ...GCAAGAUGCUGGCAUAGCU.....                                     | 5     |
| ...GCAAGAUGCUGGCAUAGCUG.....                                    | 6     |
| ...GCAAGAUGCUGGCAUAGCUGU.....                                   | 8     |
| ....CAAGAUGCUGGCAUAGC.....                                      | 6     |
| ....CAAGAUGCUGGCAUAGCU.....                                     | 10    |
| ....CAAGAUGCUGGCAUAGCUG.....                                    | 3     |
| ....CAAGAUGCUGGCAUAGCUGU.....                                   | 3     |
| ....CAAGAUGCUGGCAUAGCUGUU.....                                  | 2     |
| .....AAGAUGCUGGCAUAGC.....                                      | 6     |
| .....AAGAUGCUGGCAUAGCU.....                                     | 4     |
| .....AAGAUGCUGGCAUAGCUG.....                                    | 6     |
| .....AAGAUGCUGGCAUAGCUGU.....                                   | 13    |
| .....AAGAUGCUGGCAUAGCUGUUGAAC.....                              | 4     |
| .....AGAUGCUGGCAUAGCU.....                                      | 3     |
| .....AGAUGCUGGCAUAGCUGU.....                                    | 2     |
| .....AGAUGCUGGCAUAGCUGUU.....                                   | 3     |
| .....AGAUGCUGGCAUAGCUGUUGA.....                                 | 3     |
| .....AGAUGCUGGCAUAGCUGUUGAAC.....                               | 6     |
| .....GAUGCUGGCAUAGCUG.....                                      | 2     |
| .....GAUGCUGGCAUAGCUGU.....                                     | 5     |

|                                       |    |
|---------------------------------------|----|
| .....GAUGCUGGCAUAGCUGUUGA.....        | 2  |
| .....GAUGCUGGCAUAGCUGUUGAA.....       | 3  |
| .....AUGCUGGCAUAGCUGU.....            | 6  |
| .....AUGCUGGCAUAGCUGUU.....           | 2  |
| .....AUGCUGGCAUAGCUGUUGAA.....        | 5  |
| .....AUGCUGGCAUAGCUGUUGAAC.....       | 3  |
| .....UGCUGGCAUAGCUGUU.....            | 3  |
| .....UGCUGGCAUAGCUGUUGAAC.....        | 6  |
| .....UGGCAUAGCUGUUGAAC.....           | 2  |
| .....UGGCAUAGCUGUUGAACUGGGAACC.....   | 2  |
| .....CUGUUGAACUGGGAAC.....            | 5  |
| .....CUGUUGAACUGGGAACC.....           | 3  |
| .....CUGUUGAACUGGGAACCUGCU.....       | 2  |
| .....CUGUUGAACUGGGAACCUGCUAUGC.....   | 24 |
| .....UGUUGAACUGGGAACCUGC.....         | 49 |
| .....UGUUGAACUGGGAACCUGCUAUG.....     | 5  |
| .....UGUUGAACUGGGAACCUGCUAUGC.....    | 9  |
| .....UGUUGAACUGGGAACCUGCUAUGCC.....   | 4  |
| .....UGUUGAACUGGGAACCUGCUAUGCCA.....  | 2  |
| .....GUUGAACUGGGAACCUG.....           | 3  |
| .....GUUGAACUGGGAACCUGC.....          | 8  |
| .....GUUGAACUGGGAACCUGCUAUGC.....     | 3  |
| .....UUGAACUGGGAACCUGCUAUG.....       | 4  |
| .....UUGAACUGGGAACCUGCUAUGC.....      | 27 |
| .....UUGAACUGGGAACCUGCUAUGCC.....     | 16 |
| .....UUGAACUGGGAACCUGCUAUGCCA.....    | 7  |
| .....UUGAACUGGGAACCUGCUAUGCCAA.....   | 2  |
| .....UGAACUGGGAACCUGCUAUGC.....       | 3  |
| .....UGAACUGGGAACCUGCUAUGCC.....      | 2  |
| .....UGAACUGGGAACCUGCUAUGCCAAC.....   | 2  |
| .....ACUGGGAACCUGCUAUGCCAACAUAU.....  | 2  |
| .....ACUGGGAACCUGCUAUGCCAACAUAUU..... | 2  |
| .....CUGGGAACCUGCUAUGCC.....          | 2  |
| .....CUGGGAACCUGCUAUGCCAAC.....       | 2  |
| .....CUGGGAACCUGCUAUGCCAACAU.....     | 3  |
| .....CUGGGAACCUGCUAUGCCAACAUA.....    | 3  |
| .....CUGGGAACCUGCUAUGCCAACAUAU.....   | 6  |
| .....CUGGGAACCUGCUAUGCCAACAUAUU.....  | 47 |
| .....UGGGAACCUGCUAUGCC.....           | 15 |
| .....UGGGAACCUGCUAUGCCA.....          | 8  |
| .....UGGGAACCUGCUAUGCCAA.....         | 7  |
| .....UGGGAACCUGCUAUGCCAAC.....        | 4  |
| .....UGGGAACCUGCUAUGCCAACA.....       | 3  |
| .....UGGGAACCUGCUAUGCCAACAUAU.....    | 5  |
| .....UGGGAACCUGCUAUGCCAACAUAUU.....   | 20 |
| .....GGGAACCUGCUAUGCC.....            | 40 |
| .....GGGAACCUGCUAUGCCA.....           | 15 |

|                                       |    |
|---------------------------------------|----|
| .....GGGAACCUGCUAUGCCAA.....          | 25 |
| .....GGGAACCUGCUAUGCCAAC.....         | 13 |
| .....GGGAACCUGCUAUGCCAACA.....        | 11 |
| .....GGGAACCUGCUAUGCCAACAUA.....      | 2  |
| .....GGGAACCUGCUAUGCCAACAUAU.....     | 7  |
| .....GGGAACCUGCUAUGCCAACAUAUU.....    | 38 |
| .....GGGAACCUGCUAUGCCAACAUAUUG.....   | 3  |
| .....GGGAACCUGCUAUGCCAACAUAUUGCC..... | 3  |
| .....GGAACCUGCUAUGCCA.....            | 17 |
| .....GGAACCUGCUAUGCCAA.....           | 10 |
| .....GGAACCUGCUAUGCCAAC.....          | 9  |
| .....GGAACCUGCUAUGCCAACA.....         | 3  |
| .....GGAACCUGCUAUGCCAACAU.....        | 2  |
| .....GGAACCUGCUAUGCCAACAUAU.....      | 2  |
| .....GGAACCUGCUAUGCCAACAUAUU.....     | 23 |
| .....GGAACCUGCUAUGCCAACAUAUUG.....    | 3  |
| .....GGAACCUGCUAUGCCAACAUAUUGCC.....  | 8  |
| .....GAACCUGCUAUGCCAACAUAU.....       | 4  |
| .....GAACCUGCUAUGCCAACAUAUU.....      | 20 |
| .....AACCUGCUAUGCCAACAUAU.....        | 5  |
| .....AACCUGCUAUGCCAACAUAUU.....       | 20 |
| .....AACCUGCUAUGCCAACAUAUUGCCA.....   | 6  |
| .....AACCUGCUAUGCCAACAUAUUGCCAU.....  | 3  |
| .....AACCUGCUAUGCCAACAUAUUGCCAUU..... | 5  |
| .....ACCUGCUAUGCCAACAUAU.....         | 2  |
| .....ACCUGCUAUGCCAACAUAUU.....        | 24 |
| .....ACCUGCUAUGCCAACAUAUUG.....       | 2  |
| .....ACCUGCUAUGCCAACAUAUUGCC.....     | 7  |
| .....ACCUGCUAUGCCAACAUAUUGCCAU.....   | 5  |
| .....ACCUGCUAUGCCAACAUAUUGCCAUU.....  | 4  |
| .....ACCUGCUAUGCCAACAUAUUGCCAUUU..... | 2  |
| .....CCUGCUAUGCCAACAUA.....           | 2  |
| .....CCUGCUAUGCCAACAUA.....           | 2  |
| .....CCUGCUAUGCCAACAUAUU.....         | 34 |
| .....CCUGCUAUGCCAACAUAUUGCC.....      | 3  |
| .....CCUGCUAUGCCAACAUAUUGCCA.....     | 2  |
| .....CCUGCUAUGCCAACAUAUUGCCAUU.....   | 5  |
| .....CCUGCUAUGCCAACAUAUUGCCAUUU.....  | 9  |
| .....CCUGCUAUGCCAACAUAUUGCCAUUUU..... | 8  |
| .....CUGCUAUGCCAACAUAU.....           | 8  |
| .....CUGCUAUGCCAACAUAUU.....          | 53 |
| .....CUGCUAUGCCAACAUAUUGC.....        | 4  |
| .....CUGCUAUGCCAACAUAUUGCC.....       | 2  |
| .....CUGCUAUGCCAACAUAUUGCCA.....      | 9  |
| .....CUGCUAUGCCAACAUAUUGCCAU.....     | 25 |
| .....CUGCUAUGCCAACAUAUUGCCAUU.....    | 10 |
| .....CUGCUAUGCCAACAUAUUGCCAUUU.....   | 23 |

|                                  |      |
|----------------------------------|------|
| .....CUGCUAUGCCAACAUAUUGCCAUUUU. | 22   |
| .....CUGCUAUGCCAACAUAUUGCCAUUUUU | 12   |
| .....UGCUAUGCCAACAUAU.....       | 7    |
| .....UGCUAUGCCAACAUAUU.....      | 19   |
| .....UGCUAUGCCAACAUAUUG.....     | 10   |
| .....UGCUAUGCCAACAUAUUGC.....    | 81   |
| .....UGCUAUGCCAACAUAUUGCC.....   | 169  |
| .....UGCUAUGCCAACAUAUUGCCA.....  | 173  |
| .....UGCUAUGCCAACAUAUUGCCA.....  | 857  |
| .....UGCUAUGCCAACAUAUUGCCA.....  | 3649 |
| .....UGCUAUGCCAACAUAUUGCCA.....  | 633  |
| .....UGCUAUGCCAACAUAUUGCCA.....  | 65   |
| .....UGCUAUGCCAACAUAUUGCCA.....  | 4    |
| .....GCUAUGCCAACAUAUU.....       | 3    |
| .....GCUAUGCCAACAUAUUGC.....     | 28   |
| .....GCUAUGCCAACAUAUUGCC.....    | 53   |
| .....GCUAUGCCAACAUAUUGCCA.....   | 37   |
| .....GCUAUGCCAACAUAUUGCCA.....   | 127  |
| .....GCUAUGCCAACAUAUUGCCA.....   | 744  |
| .....GCUAUGCCAACAUAUUGCCA.....   | 223  |
| .....GCUAUGCCAACAUAUUGCCA.....   | 53   |
| .....GCUAUGCCAACAUAUUGCCA.....   | 13   |
| .....CUAUGCCAACAUAUUGC.....      | 32   |
| .....CUAUGCCAACAUAUUGCC.....     | 39   |
| .....CUAUGCCAACAUAUUGCCA.....    | 24   |
| .....CUAUGCCAACAUAUUGCCA.....    | 65   |
| .....CUAUGCCAACAUAUUGCCA.....    | 293  |
| .....CUAUGCCAACAUAUUGCCA.....    | 1217 |
| .....CUAUGCCAACAUAUUGCCA.....    | 133  |
| .....CUAUGCCAACAUAUUGCCA.....    | 5    |
| .....UAUGCCAACAUAUUGC.....       | 61   |
| .....UAUGCCAACAUAUUGCC.....      | 67   |
| .....UAUGCCAACAUAUUGCCA.....     | 37   |
| .....UAUGCCAACAUAUUGCCA.....     | 62   |
| .....UAUGCCAACAUAUUGCCA.....     | 246  |
| .....UAUGCCAACAUAUUGCCA.....     | 2394 |
| .....UAUGCCAACAUAUUGCCA.....     | 2045 |
| .....UAUGCCAACAUAUUGCCA.....     | 159  |
| .....AUGCCAACAUAUUGCC.....       | 4    |
| .....AUGCCAACAUAUUGCCA.....      | 3    |
| .....AUGCCAACAUAUUGCCA.....      | 12   |
| .....AUGCCAACAUAUUGCCA.....      | 79   |
| .....AUGCCAACAUAUUGCCA.....      | 109  |
| .....AUGCCAACAUAUUGCCA.....      | 80   |
| .....AUGCCAACAUAUUGCCA.....      | 8    |
| .....UGCCAACAUAUUGCCA.....       | 6    |
| .....UGCCAACAUAUUGCCA.....       | 13   |



|                            |    |
|----------------------------|----|
| .....UGCCAACAUAUUGCCAUUU.. | 21 |
| .....UGCCAACAUAUUGCCAUUUU. | 13 |
| .....UGCCAACAUAUUGCCAUUUUU | 2  |
| .....GCCAACAUAUUGCCAU....  | 3  |
| .....GCCAACAUAUUGCCAU... . | 7  |
| .....GCCAACAUAUUGCCAUUU..  | 11 |
| .....GCCAACAUAUUGCCAUUUU.  | 11 |
| .....CCAACAUAUUGCCAU... .  | 6  |
| .....CCAACAUAUUGCCAUUU..   | 5  |
| .....CCAACAUAUUGCCAUUUU.   | 2  |
| .....CAACAUAUUGCCAUUU..    | 13 |
| .....CAACAUAUUGCCAUUUU.    | 10 |
| .....CAACAUAUUGCCAUUUUU    | 2  |
| .....AACAUUUGCCAUUUU.      | 5  |

**#v45 pHIPPY PGL3 hU6 promoter**

UUUAUAUAUCUUGGCUAGCGUCUCAAAAAGAGCUGUUUCUGAGGAGCCUUUUU

|                                    |      |
|------------------------------------|------|
| .....AAAAGAGCUGUUUCU.....          | 2    |
| .....AAAAGAGCUGUUUCUG.....         | 2    |
| .....AAAAGAGCUGUUUCUGAGGAGCCUUU..  | 5    |
| .....AAAAGAGCUGUUUCUGAGGAGCCUUUU.  | 19   |
| .....AAAGAGCUGUUUCUGAGGA.....      | 2    |
| .....AAAGAGCUGUUUCUGAGGAG.....     | 3    |
| .....AAAGAGCUGUUUCUGAGGAGC.....    | 2    |
| .....AAAGAGCUGUUUCUGAGGAGCCU....   | 2    |
| .....AAAGAGCUGUUUCUGAGGAGCCUU... . | 6    |
| .....AAAGAGCUGUUUCUGAGGAGCCUUU..   | 54   |
| .....AAAGAGCUGUUUCUGAGGAGCCUUUU.   | 21   |
| .....AAGAGCUGUUUCUGAGGA.....       | 6    |
| .....AAGAGCUGUUUCUGAGGAG.....      | 6    |
| .....AAGAGCUGUUUCUGAGGAGC.....     | 10   |
| .....AAGAGCUGUUUCUGAGGAGCC.....    | 5    |
| .....AAGAGCUGUUUCUGAGGAGCCU....    | 6    |
| .....AAGAGCUGUUUCUGAGGAGCCUU... .  | 99   |
| .....AAGAGCUGUUUCUGAGGAGCCUUU..    | 264  |
| .....AAGAGCUGUUUCUGAGGAGCCUUUU.    | 246  |
| .....AAGAGCUGUUUCUGAGGAGCCUUUUU    | 47   |
| .....AGAGCUGUUUCUGAGG.....         | 32   |
| .....AGAGCUGUUUCUGAGGA.....        | 96   |
| .....AGAGCUGUUUCUGAGGAG.....       | 206  |
| .....AGAGCUGUUUCUGAGGAGC.....      | 237  |
| .....AGAGCUGUUUCUGAGGAGCC.....     | 170  |
| .....AGAGCUGUUUCUGAGGAGCCU....     | 444  |
| .....AGAGCUGUUUCUGAGGAGCCUU... .   | 1531 |
| .....AGAGCUGUUUCUGAGGAGCCUUU..     | 7769 |
| .....AGAGCUGUUUCUGAGGAGCCUUUU.     | 3452 |
| .....AGAGCUGUUUCUGAGGAGCCUUUUU     | 705  |

|                               |       |
|-------------------------------|-------|
| .....GAGCUGUUUCUGAGGA.....    | 598   |
| .....GAGCUGUUUCUGAGGAG.....   | 992   |
| .....GAGCUGUUUCUGAGGAGC.....  | 1408  |
| .....GAGCUGUUUCUGAGGAGCC..... | 1374  |
| .....GAGCUGUUUCUGAGGAGCCU.... | 1684  |
| .....GAGCUGUUUCUGAGGAGCCUU... | 9087  |
| .....GAGCUGUUUCUGAGGAGCCUUU.. | 36929 |
| .....GAGCUGUUUCUGAGGAGCCUUUU. | 15200 |
| .....GAGCUGUUUCUGAGGAGCCUUUUU | 4858  |
| .....AGCUGUUUCUGAGGAG.....    | 49    |
| .....AGCUGUUUCUGAGGAGC.....   | 66    |
| .....AGCUGUUUCUGAGGAGCC.....  | 83    |
| .....AGCUGUUUCUGAGGAGCCU....  | 138   |
| .....AGCUGUUUCUGAGGAGCCUU...  | 897   |
| .....AGCUGUUUCUGAGGAGCCUUU..  | 4690  |
| .....AGCUGUUUCUGAGGAGCCUUUU.  | 1975  |
| .....AGCUGUUUCUGAGGAGCCUUUUU  | 474   |
| .....GCUGUUUCUGAGGAGC.....    | 132   |
| .....GCUGUUUCUGAGGAGCC.....   | 66    |
| .....GCUGUUUCUGAGGAGCCU....   | 87    |
| .....GCUGUUUCUGAGGAGCCUU...   | 306   |
| .....GCUGUUUCUGAGGAGCCUUU..   | 1642  |
| .....GCUGUUUCUGAGGAGCCUUUU.   | 933   |
| .....GCUGUUUCUGAGGAGCCUUUUU   | 421   |
| .....CUGUUUCUGAGGAGCC.....    | 271   |
| .....CUGUUUCUGAGGAGCCU....    | 16    |
| .....CUGUUUCUGAGGAGCCUU...    | 41    |
| .....CUGUUUCUGAGGAGCCUUU..    | 244   |
| .....CUGUUUCUGAGGAGCCUUUU.    | 248   |
| .....CUGUUUCUGAGGAGCCUUUUU    | 35    |
| .....UGUUUCUGAGGAGCCU....     | 55    |
| .....UGUUUCUGAGGAGCCUU...     | 131   |
| .....UGUUUCUGAGGAGCCUUU..     | 697   |
| .....UGUUUCUGAGGAGCCUUUU.     | 754   |
| .....UGUUUCUGAGGAGCCUUUUU     | 107   |
| .....GUUUCUGAGGAGCCUU....     | 79    |
| .....GUUUCUGAGGAGCCUUU..      | 463   |
| .....GUUUCUGAGGAGCCUUUU.      | 505   |
| .....GUUUCUGAGGAGCCUUUUU      | 71    |
| .....UUUCUGAGGAGCCUUU..       | 289   |
| .....UUUCUGAGGAGCCUUUU.       | 261   |
| .....UUUCUGAGGAGCCUUUUU       | 46    |
| .....UUCUGAGGAGCCUUUU.        | 480   |
| .....UUCUGAGGAGCCUUUUU        | 93    |
| .....UCUGAGGAGCCUUUUU         | 29    |

#V45 PHIPPY PGL3 hH1 promoter

UUUAUAAGUGGAUCCUGAGACCGUCUCAAAAAGGCUCCUCAGAAACAGCUCUUUUU  
\*\*\*\*\*GGCUCCUCAGAAACAGCUCUU\*\*\*

|                                       |       |
|---------------------------------------|-------|
| .....AAAAAGGCUCCUCAGA.....            | 2     |
| .....AAAAAGGCUCCUCAGAAACAG.....       | 7     |
| .....AAAAAGGCUCCUCAGAAACAGC.....      | 11    |
| .....AAAAAGGCUCCUCAGAAACAGCUC.....    | 3     |
| .....AAAAAGGCUCCUCAGAAACAGCUCU.....   | 32    |
| .....AAAAAGGCUCCUCAGAAACAGCUCUU.....  | 105   |
| .....AAAAAGGCUCCUCAGAAACAGCUCUUU..... | 820   |
| .....AAAAGGCUCCUCAGAAAC.....          | 2     |
| .....AAAAGGCUCCUCAGAAACA.....         | 12    |
| .....AAAAGGCUCCUCAGAAACAG.....        | 33    |
| .....AAAAGGCUCCUCAGAAACAGC.....       | 32    |
| .....AAAAGGCUCCUCAGAAACAGCU.....      | 88    |
| .....AAAAGGCUCCUCAGAAACAGCUC.....     | 24    |
| .....AAAAGGCUCCUCAGAAACAGCUCU.....    | 249   |
| .....AAAAGGCUCCUCAGAAACAGCUCUU.....   | 669   |
| .....AAAAGGCUCCUCAGAAACAGCUCUUU.....  | 3835  |
| .....AAAAGGCUCCUCAGAAACAGCUCUUUU..... | 1371  |
| .....AAAGGCUCCUCAGAAAC.....           | 7     |
| .....AAAGGCUCCUCAGAAACA.....          | 11    |
| .....AAAGGCUCCUCAGAAACAG.....         | 106   |
| .....AAAGGCUCCUCAGAAACAGC.....        | 102   |
| .....AAAGGCUCCUCAGAAACAGCU.....       | 300   |
| .....AAAGGCUCCUCAGAAACAGCUC.....      | 763   |
| .....AAAGGCUCCUCAGAAACAGCUCU.....     | 1781  |
| .....AAAGGCUCCUCAGAAACAGCUCUU.....    | 3464  |
| .....AAAGGCUCCUCAGAAACAGCUCUUU.....   | 10263 |
| .....AAAGGCUCCUCAGAAACAGCUCUUUU.....  | 2922  |
| .....AAAGGCUCCUCAGAAACAGCUCUUUUU..... | 328   |
| .....AAGGCUCCUCAGAAAC.....            | 4     |
| .....AAGGCUCCUCAGAAACA.....           | 9     |
| .....AAGGCUCCUCAGAAACAG.....          | 55    |
| .....AAGGCUCCUCAGAAACAGC.....         | 34    |
| .....AAGGCUCCUCAGAAACAGCU.....        | 110   |
| .....AAGGCUCCUCAGAAACAGCUC.....       | 161   |
| .....AAGGCUCCUCAGAAACAGCUCU.....      | 1825  |
| .....AAGGCUCCUCAGAAACAGCUCUU.....     | 3703  |
| .....AAGGCUCCUCAGAAACAGCUCUUU.....    | 7175  |
| .....AAGGCUCCUCAGAAACAGCUCUUUU.....   | 2021  |
| .....AAGGCUCCUCAGAAACAGCUCUUUUU.....  | 271   |
| .....AGGCUCCUCAGAAACA.....            | 61    |
| .....AGGCUCCUCAGAAACAG.....           | 303   |
| .....AGGCUCCUCAGAAACAGC.....          | 225   |
| .....AGGCUCCUCAGAAACAGCU.....         | 416   |
| .....AGGCUCCUCAGAAACAGCUC.....        | 994   |
| .....AGGCUCCUCAGAAACAGCUCU.....       | 18228 |

|                                 |       |
|---------------------------------|-------|
| .....AGGCUCCUCAGAAACAGCUCUU...  | 18313 |
| .....AGGCUCCUCAGAAACAGCUCUUU..  | 35084 |
| .....AGGCUCCUCAGAAACAGCUCUUUU.. | 10078 |
| .....AGGCUCCUCAGAAACAGCUCUUUUU  | 1748  |
| .....GGCUCCUCAGAAACAG.....      | 80    |
| .....GGCUCCUCAGAAACAGC.....     | 43    |
| .....GGCUCCUCAGAAACAGCU.....    | 80    |
| .....GGCUCCUCAGAAACAGCUC.....   | 249   |
| .....GGCUCCUCAGAAACAGCUCU....   | 3769  |
| .....GGCUCCUCAGAAACAGCUCUU...   | 2843  |
| .....GGCUCCUCAGAAACAGCUCUUU..   | 5260  |
| .....GGCUCCUCAGAAACAGCUCUUUU..  | 1746  |
| .....GGCUCCUCAGAAACAGCUCUUUUU   | 342   |
| .....GCUCCUCAGAAACAGC.....      | 3     |
| .....GCUCCUCAGAAACAGCU.....     | 3     |
| .....GCUCCUCAGAAACAGCUC.....    | 7     |
| .....GCUCCUCAGAAACAGCUCU....    | 64    |
| .....GCUCCUCAGAAACAGCUCUU...    | 87    |
| .....GCUCCUCAGAAACAGCUCUUU..    | 335   |
| .....GCUCCUCAGAAACAGCUCUUUU..   | 140   |
| .....GCUCCUCAGAAACAGCUCUUUUU    | 18    |
| .....CUCCUCAGAAACAGCUC.....     | 4     |
| .....CUCCUCAGAAACAGCUCU....     | 47    |
| .....CUCCUCAGAAACAGCUCUU...     | 73    |
| .....CUCCUCAGAAACAGCUCUUU..     | 150   |
| .....CUCCUCAGAAACAGCUCUUUU..    | 123   |
| .....CUCCUCAGAAACAGCUCUUUUU     | 99    |
| .....UCCUCAGAAACAGCUC.....      | 5     |
| .....UCCUCAGAAACAGCUCU....      | 23    |
| .....UCCUCAGAAACAGCUCUU...      | 59    |
| .....UCCUCAGAAACAGCUCUUU..      | 121   |
| .....UCCUCAGAAACAGCUCUUUU..     | 44    |
| .....UCCUCAGAAACAGCUCUUUUU      | 13    |
| .....CCUCAGAAACAGCUCU....       | 45    |
| .....CCUCAGAAACAGCUCUU...       | 34    |
| .....CCUCAGAAACAGCUCUUU..       | 103   |
| .....CCUCAGAAACAGCUCUUUU..      | 47    |
| .....CCUCAGAAACAGCUCUUUUU       | 9     |
| .....CUCAGAAACAGCUCUU...        | 59    |
| .....CUCAGAAACAGCUCUUU..        | 164   |
| .....CUCAGAAACAGCUCUUUU..       | 49    |
| .....CUCAGAAACAGCUCUUUUU        | 5     |
| .....UCAGAAACAGCUCUUU..         | 145   |
| .....UCAGAAACAGCUCUUUU..        | 61    |
| .....UCAGAAACAGCUCUUUUU         | 5     |
| .....CAGAAACAGCUCUUU..          | 3     |
| .....CAGAAACAGCUCUUUU..         | 88    |

.....CAGAAACAGCUCUUUUU 7  
 .....AGAAACAGCUCUUUUU 8

**#shp53 pLKO.1 puro**

GGACGAAACACCGACUCCAGUGGUAUAUCUACUUCUACAAGAGAGUAGAUUACCACUGGAGUCUUUUU

\*\*\*\*\*GACUCCAGUGGUAUAUCUACUUC\*\*\*\*\*AGUAGAUUACCACUGGAGUCUU\*\*\*

.....CCGACUCCAGUGGUAUAUCUACU..... 2  
 .....CGACUCCAGUGGUAUAUCUAC..... 7  
 .....CGACUCCAGUGGUAUAUCUACU..... 17  
 .....CGACUCCAGUGGUAUAUCUACUU..... 14  
 .....GACUCCAGUGGUAUAUC..... 94  
 .....GACUCCAGUGGUAUAUCU..... 41  
 .....GACUCCAGUGGUAUAUCUA..... 59  
 .....GACUCCAGUGGUAUAUCUAC..... 564  
 .....GACUCCAGUGGUAUAUCUACU..... 554  
 .....GACUCCAGUGGUAUAUCUACUU..... 136  
 .....GACUCCAGUGGUAUAUCUACUUC..... 74  
 .....GACUCCAGUGGUAUAUCUACUUCA..... 17  
 .....GACUCCAGUGGUAUAUCUACUUCAA..... 24  
 .....GACUCCAGUGGUAUAUCUACUUCUACAAG..... 20  
 .....GACUCCAGUGGUAUAUCUACUUCUACAAGA..... 26  
 .....GACUCCAGUGGUAUAUCUACUUCUACAAGAG..... 10  
 .....ACUCCAGUGGUAUAUCUAC..... 9  
 .....ACUCCAGUGGUAUAUCUACU..... 5  
 .....ACUCCAGUGGUAUAUCUACUU..... 3  
 .....ACUCCAGUGGUAUAUCUACUUCUACAAGA..... 2  
 .....CUCCAGUGGUAUAUCUA..... 2  
 .....CUCCAGUGGUAUAUCUAC..... 17  
 .....CUCCAGUGGUAUAUCUACU..... 25  
 .....CUCCAGUGGUAUAUCUACUU..... 6  
 .....CUCCAGUGGUAUAUCUACUUC..... 3  
 .....CUCCAGUGGUAUAUCUACUUCAA..... 2  
 .....UCCAGUGGUAUAUCUAC..... 9  
 .....UCCAGUGGUAUAUCUACU..... 21  
 .....UCCAGUGGUAUAUCUACUU..... 4  
 .....UCCAGUGGUAUAUCUACUUC..... 2  
 .....UCCAGUGGUAUAUCUACUUCUACAAGA..... 2  
 .....CCAGUGGUAUAUCUACU..... 16  
 .....CCAGUGGUAUAUCUACUU..... 6  
 .....CCAGUGGUAUAUCUACUUCUACAAGAGA..... 3  
 .....CAGUGGUAUAUCUACUUC..... 6  
 .....CAGUGGUAUAUCUACUUCUACAAGA..... 2  
 .....AGUGGUAUAUCUACUUCUACAAGAGAG..... 2  
 .....UGGUAUAUCUACUUCUACAAGAG..... 2  
 .....GGUAUAUCUACUUCUACAAGAGAGUAG..... 2  
 .....GUAUAUCUACUUCUACAAGAG..... 3  
 .....GUAUAUCUACUUCUACAAGAGAG..... 5

|                                       |    |
|---------------------------------------|----|
| .....GUAUUCUACUUCAAGAGAGUAG.....      | 3  |
| .....GUAUUCUACUUCAAGAGAGUAGAU.....    | 2  |
| .....UAAUCUACUUCAAGAGAG.....          | 4  |
| .....UAAUCUACUUCAAGAGAGUAG.....       | 3  |
| .....UAAUCUACUUCAAGAGAGUAGAU.....     | 3  |
| .....AAUCUACUUCAAGAGAG.....           | 2  |
| .....AUCUACUUCAAGAGAG.....            | 2  |
| .....UCUACUUCAAGAGAGU.....            | 3  |
| .....CUACUUCAAGAGAGUAGA.....          | 2  |
| .....CUACUUCAAGAGAGUAGAU.....         | 4  |
| .....UACUUCAAGAGAGUAG.....            | 6  |
| .....UACUUCAAGAGAGUAGAU.....          | 7  |
| .....ACUUCAAGAGAGUAGAU.....           | 4  |
| .....ACUUCAAGAGAGUAGAUU.....          | 2  |
| .....CUUCAAGAGAGUAGAU.....            | 38 |
| .....CUUCAAGAGAGUAGAUU.....           | 10 |
| .....CUUCAAGAGAGUAGAUUA.....          | 5  |
| .....CUUCAAGAGAGUAGAUUAC.....         | 9  |
| .....CUUCAAGAGAGUAGAUUACCA.....       | 5  |
| .....CUUCAAGAGAGUAGAUUACCAC.....      | 7  |
| .....CUUCAAGAGAGUAGAUUACCACUG.....    | 20 |
| .....CUUCAAGAGAGUAGAUUACCACUGG.....   | 9  |
| .....CUUCAAGAGAGUAGAUUACCACUGGA.....  | 13 |
| .....CUUCAAGAGAGUAGAUUACCACUGGAG..... | 14 |
| .....UUCAAGAGAGUAGAUUAC.....          | 3  |
| .....UUCAAGAGAGUAGAUUACCA.....        | 2  |
| .....UUCAAGAGAGUAGAUUACCACUG.....     | 9  |
| .....UUCAAGAGAGUAGAUUACCACUGG.....    | 11 |
| .....UUCAAGAGAGUAGAUUACCACUGGA.....   | 13 |
| .....UUCAAGAGAGUAGAUUACCACUGGAG.....  | 12 |
| .....UUCAAGAGAGUAGAUUACCACUGGAGU..... | 4  |
| .....UCAAGAGAGUAGAUUA.....            | 3  |
| .....UCAAGAGAGUAGAUUACC.....          | 4  |
| .....UCAAGAGAGUAGAUUACCACU.....       | 3  |
| .....UCAAGAGAGUAGAUUACCACUG.....      | 8  |
| .....UCAAGAGAGUAGAUUACCACUGG.....     | 2  |
| .....UCAAGAGAGUAGAUUACCACUGGA.....    | 11 |
| .....UCAAGAGAGUAGAUUACCACUGGAG.....   | 8  |
| .....UCAAGAGAGUAGAUUACCACUGGAGU.....  | 3  |
| .....CAAGAGAGUAGAUUACCACUG.....       | 3  |
| .....CAAGAGAGUAGAUUACCACUGGA.....     | 3  |
| .....CAAGAGAGUAGAUUACCACUGGAGU.....   | 2  |
| .....CAAGAGAGUAGAUUACCACUGGAGUCU..... | 11 |
| .....AAGAGAGUAGAUUACCA.....           | 4  |
| .....AAGAGAGUAGAUUACCACUG.....        | 3  |
| .....AAGAGAGUAGAUUACCACUGG.....       | 2  |
| .....AAGAGAGUAGAUUACCACUGGA.....      | 2  |

|                                     |     |
|-------------------------------------|-----|
| .....AAGAGAGUAGAUUACCACUGGAG.....   | 3   |
| .....AAGAGAGUAGAUUACCACUGGAGUCU.... | 31  |
| .....AAGAGAGUAGAUUACCACUGGAGUCUU... | 76  |
| .....AGAGAGUAGAUUACCAC.....         | 4   |
| .....AGAGAGUAGAUUACCACUGGAGUCU....  | 12  |
| .....AGAGAGUAGAUUACCACUGGAGUCUU...  | 21  |
| .....AGAGAGUAGAUUACCACUGGAGUCUUU..  | 23  |
| .....GAGAGUAGAUUACCACUGG.....       | 2   |
| .....GAGAGUAGAUUACCACUGGAG.....     | 2   |
| .....GAGAGUAGAUUACCACUGGAGUCU....   | 21  |
| .....GAGAGUAGAUUACCACUGGAGUCUU...   | 32  |
| .....GAGAGUAGAUUACCACUGGAGUCUUU..   | 31  |
| .....GAGAGUAGAUUACCACUGGAGUCUUUU..  | 2   |
| .....AGAGUAGAUUACCACUGG.....        | 2   |
| .....AGAGUAGAUUACCACUGGA.....       | 2   |
| .....AGAGUAGAUUACCACUGGAG.....      | 3   |
| .....AGAGUAGAUUACCACUGGAGU.....     | 4   |
| .....AGAGUAGAUUACCACUGGAGUC.....    | 2   |
| .....AGAGUAGAUUACCACUGGAGUCU....    | 39  |
| .....AGAGUAGAUUACCACUGGAGUCUU...    | 92  |
| .....AGAGUAGAUUACCACUGGAGUCUUU..    | 71  |
| .....AGAGUAGAUUACCACUGGAGUCUUUU..   | 9   |
| .....AGAGUAGAUUACCACUGGAGUCUUUUU..  | 3   |
| .....GAGUAGAUUACCACUG.....          | 3   |
| .....GAGUAGAUUACCACUGGAG.....       | 4   |
| .....GAGUAGAUUACCACUGGAGUCU....     | 28  |
| .....GAGUAGAUUACCACUGGAGUCUU...     | 54  |
| .....GAGUAGAUUACCACUGGAGUCUUU..     | 33  |
| .....GAGUAGAUUACCACUGGAGUCUUUU..    | 3   |
| .....GAGUAGAUUACCACUGGAGUCUUUUU..   | 2   |
| .....AGUAGAUUACCACUGG.....          | 2   |
| .....AGUAGAUUACCACUGGA.....         | 2   |
| .....AGUAGAUUACCACUGGAGUC.....      | 2   |
| .....AGUAGAUUACCACUGGAGUCU....      | 11  |
| .....AGUAGAUUACCACUGGAGUCUU...      | 15  |
| .....AGUAGAUUACCACUGGAGUCUUU..      | 8   |
| .....GUAGAUUACCACUGGA.....          | 6   |
| .....GUAGAUUACCACUGGAG.....         | 7   |
| .....GUAGAUUACCACUGGAGU.....        | 4   |
| .....GUAGAUUACCACUGGAGUC.....       | 3   |
| .....GUAGAUUACCACUGGAGUCU....       | 38  |
| .....GUAGAUUACCACUGGAGUCUU...       | 150 |
| .....GUAGAUUACCACUGGAGUCUUU..       | 205 |
| .....GUAGAUUACCACUGGAGUCUUUU..      | 4   |
| .....UAGAUUACCACUGGAG.....          | 5   |
| .....UAGAUUACCACUGGAGU.....         | 11  |
| .....UAGAUUACCACUGGAGUC.....        | 9   |

|                               |      |
|-------------------------------|------|
| .....UAGAUUACCACUGGAGUCU..... | 60   |
| .....UAGAUUACCACUGGAGUCUU...  | 492  |
| .....UAGAUUACCACUGGAGUCUUU..  | 2241 |
| .....UAGAUUACCACUGGAGUCUUUU.  | 456  |
| .....UAGAUUACCACUGGAGUCUUUUU  | 23   |
| .....AGAUUACCACUGGAGUC.....   | 4    |
| .....AGAUUACCACUGGAGUCU....   | 36   |
| .....AGAUUACCACUGGAGUCUU...   | 12   |
| .....AGAUUACCACUGGAGUCUUU..   | 32   |
| .....AGAUUACCACUGGAGUCUUUU.   | 22   |
| .....AGAUUACCACUGGAGUCUUUUU   | 2    |
| .....GAUUACCACUGGAGUC.....    | 2    |
| .....GAUUACCACUGGAGUCU....    | 17   |
| .....GAUUACCACUGGAGUCUU...    | 12   |
| .....GAUUACCACUGGAGUCUUU..    | 20   |
| .....AUUACCACUGGAGUCU....     | 21   |
| .....AUUACCACUGGAGUCUU...     | 16   |
| .....AUUACCACUGGAGUCUUU..     | 17   |
| .....AUUACCACUGGAGUCUUUU.     | 3    |
| .....UUACCACUGGAGUCUU...      | 11   |
| .....UUACCACUGGAGUCUUU..      | 7    |
| .....UACCACUGGAGUCUUU..       | 17   |
| .....UACCACUGGAGUCUUUU.       | 3    |
| .....ACCACUGGAGUCUUUU.        | 3    |

**#shp63alpha pLKO.1**

|                                                                   |      |
|-------------------------------------------------------------------|------|
| GACGAAACACCGGCCGUUUCGUCAGAACACACAUCUCGAGAUGUGUGUUCGACGAAACGGUUUUU |      |
| .....ACACCGGCCGUUUCGUCAGAA.....                                   | 6    |
| .....CGGCCGUUUCGUCAGAACACA.....                                   | 2    |
| .....CGGCCGUUUCGUCAGAACACAC.....                                  | 13   |
| .....CGGCCGUUUCGUCAGAACACACA.....                                 | 11   |
| .....GGCCGUUUCGUCAGAA.....                                        | 106  |
| .....GGCCGUUUCGUCAGAAC.....                                       | 131  |
| .....GGCCGUUUCGUCAGAACA.....                                      | 325  |
| .....GGCCGUUUCGUCAGAACAC.....                                     | 170  |
| .....GGCCGUUUCGUCAGAACACA.....                                    | 303  |
| .....GGCCGUUUCGUCAGAACACAC.....                                   | 3723 |
| .....GGCCGUUUCGUCAGAACACACA.....                                  | 5820 |
| .....GGCCGUUUCGUCAGAACACACAUC.....                                | 162  |
| .....GGCCGUUUCGUCAGAACACACAUC.....                                | 27   |
| .....GGCCGUUUCGUCAGAACACACAUCU.....                               | 21   |
| .....GGCCGUUUCGUCAGAACACACAUCUC.....                              | 4    |
| .....GGCCGUUUCGUCAGAACACACAUCUCG.....                             | 4    |
| .....GCCGUUUCGUCAGAAC.....                                        | 3    |
| .....GCCGUUUCGUCAGAAC.....                                        | 3    |
| .....GCCGUUUCGUCAGAACAC.....                                      | 2    |
| .....GCCGUUUCGUCAGAACACA.....                                     | 6    |



|                                      |    |
|--------------------------------------|----|
| .....GCCGUUUCGUCAGAACACAC.....       | 50 |
| .....GCCGUUUCGUCAGAACACACA.....      | 64 |
| .....CCGUUUCGUCAGAACA.....           | 4  |
| .....CCGUUUCGUCAGAACAC.....          | 2  |
| .....CCGUUUCGUCAGAACACAC.....        | 13 |
| .....CCGUUUCGUCAGAACACACA.....       | 25 |
| .....CCGUUUCGUCAGAACACACA.....       | 2  |
| .....CCGUUUCGUCAGAACACACAUC.....     | 2  |
| .....CGUUUCGUCAGAACACA.....          | 4  |
| .....CGUUUCGUCAGAACACAC.....         | 31 |
| .....CGUUUCGUCAGAACACACA.....        | 49 |
| .....GUUUCGUCAGAACACA.....           | 9  |
| .....GUUUCGUCAGAACACAC.....          | 40 |
| .....GUUUCGUCAGAACACACA.....         | 51 |
| .....GUUUCGUCAGAACACACA.....         | 3  |
| .....UUUCGUCAGAACACAC.....           | 9  |
| .....UUUCGUCAGAACACACA.....          | 9  |
| .....UUUCGUCAGAACACACAUC.....        | 5  |
| .....UUUCGUCAGAACACACAUCUCG.....     | 3  |
| .....UUUCGUCAGAACACACAUCUCGA.....    | 2  |
| .....UUCGUCAGAACACACA.....           | 19 |
| .....UUCGUCAGAACACACAUCU.....        | 2  |
| .....UCGUCAGAACACACAUC.....          | 17 |
| .....UCGUCAGAACACACAUCUCGAG.....     | 2  |
| .....CGUCAGAACACACAUC.....           | 4  |
| .....UCAGAACACACAUCUCGAGAU.....      | 2  |
| .....CAGAACACACAUCUCG.....           | 2  |
| .....AGAACACACAUCUCGAGAUGUG.....     | 2  |
| .....AACACACAUCUCGAGAU.....          | 6  |
| .....AACACACAUCUCGAGAUG.....         | 3  |
| .....AACACACAUCUCGAGAUGU.....        | 2  |
| .....AACACACAUCUCGAGAUGUGU.....      | 5  |
| .....CACACAUCUCGAGAUG.....           | 4  |
| .....CACACAUCUCGAGAUGU.....          | 2  |
| .....CACAUUCUCGAGAUGUGUG.....        | 3  |
| .....ACAUCUCGAGAUGUGU.....           | 3  |
| .....ACAUCUCGAGAUGUGUG.....          | 4  |
| .....CAUCUCGAGAUGUGUG.....           | 5  |
| .....AUCUCGAGAUGUGUGU.....           | 3  |
| .....AUCUCGAGAUGUGUGUU.....          | 9  |
| .....AUCUCGAGAUGUGUGUUC.....         | 3  |
| .....AUCUCGAGAUGUGUGUUCU.....        | 5  |
| .....AUCUCGAGAUGUGUGUUCUG.....       | 7  |
| .....AUCUCGAGAUGUGUGUUCUGA.....      | 2  |
| .....AUCUCGAGAUGUGUGUUCUGAC.....     | 5  |
| .....AUCUCGAGAUGUGUGUUCUGACG.....    | 4  |
| .....AUCUCGAGAUGUGUGUUCUGACGAAA..... | 3  |

|                                       |    |
|---------------------------------------|----|
| .....AUCUCGAGAUGUGUGUUCUGACGAAAC..... | 9  |
| .....UCUCGAGAUGUGUGUUC.....           | 2  |
| .....UCUCGAGAUGUGUGUUCUGAC.....       | 2  |
| .....UCUCGAGAUGUGUGUUCUGACG.....      | 2  |
| .....UCUCGAGAUGUGUGUUCUGACGAA.....    | 3  |
| .....UCUCGAGAUGUGUGUUCUGACGAAA.....   | 5  |
| .....UCUCGAGAUGUGUGUUCUGACGAAAC.....  | 2  |
| .....UCUCGAGAUGUGUGUUCUGACGAAACG..... | 3  |
| .....CUCGAGAUGUGUGUUC.....            | 2  |
| .....CUCGAGAUGUGUGUUCU.....           | 4  |
| .....CUCGAGAUGUGUGUUCUG.....          | 5  |
| .....CUCGAGAUGUGUGUUCUGACGA.....      | 3  |
| .....CUCGAGAUGUGUGUUCUGACGAA.....     | 2  |
| .....CUCGAGAUGUGUGUUCUGACGAAA.....    | 3  |
| .....CUCGAGAUGUGUGUUCUGACGAAAC.....   | 3  |
| .....CUCGAGAUGUGUGUUCUGACGAAACGG..... | 10 |
| .....UCGAGAUGUGUGUUCU.....            | 5  |
| .....UCGAGAUGUGUGUUCUG.....           | 22 |
| .....UCGAGAUGUGUGUUCUGA.....          | 6  |
| .....UCGAGAUGUGUGUUCUGACGAAA.....     | 2  |
| .....UCGAGAUGUGUGUUCUGACGAAAC.....    | 2  |
| .....UCGAGAUGUGUGUUCUGACGAAACG.....   | 5  |
| .....UCGAGAUGUGUGUUCUGACGAAACGG.....  | 3  |
| .....UCGAGAUGUGUGUUCUGACGAAACGGU..... | 7  |
| .....CGAGAUGUGUGUUCUGACGAAACG.....    | 3  |
| .....CGAGAUGUGUGUUCUGACGAAACGG.....   | 3  |
| .....CGAGAUGUGUGUUCUGACGAAACGGUU..... | 7  |
| .....GAGAUGUGUGUUCUGACGAAAC.....      | 5  |
| .....GAGAUGUGUGUUCUGACGAAACG.....     | 2  |
| .....AGAUGUGUGUUCUGACGAAA.....        | 2  |
| .....AGAUGUGUGUUCUGACGAAAC.....       | 2  |
| .....AGAUGUGUGUUCUGACGAAACG.....      | 5  |
| .....AGAUGUGUGUUCUGACGAAACGGUUU.....  | 7  |
| .....AGAUGUGUGUUCUGACGAAACGGUUUU..... | 19 |
| .....GAUGUGUGUUCUGACGAAA.....         | 2  |
| .....GAUGUGUGUUCUGACGAAAC.....        | 3  |
| .....GAUGUGUGUUCUGACGAAACGGUUU.....   | 7  |
| .....GAUGUGUGUUCUGACGAAACGGUUUU.....  | 35 |
| .....GAUGUGUGUUCUGACGAAACGGUUUUU..... | 6  |
| .....AUGUGUGUUCUGACGAAAC.....         | 4  |
| .....AUGUGUGUUCUGACGAAACGGUUU.....    | 4  |
| .....AUGUGUGUUCUGACGAAACGGUUUU.....   | 9  |
| .....UGUGUGUUCUGACGAAAC.....          | 2  |
| .....UGUGUGUUCUGACGAAACG.....         | 3  |
| .....UGUGUGUUCUGACGAAACGG.....        | 5  |
| .....UGUGUGUUCUGACGAAACGGU.....       | 2  |
| .....UGUGUGUUCUGACGAAACGGUU.....      | 11 |

|                                 |       |
|---------------------------------|-------|
| .....UGUGUGUUCUGACGAAACGGUUU..  | 73    |
| .....UGUGUGUUCUGACGAAACGGUUUU.  | 128   |
| .....UGUGUGUUCUGACGAAACGGUUUUUU | 31    |
| .....GUGUGUUCUGACGAAA.....      | 2     |
| .....GUGUGUUCUGACGAAACGGUU...   | 4     |
| .....GUGUGUUCUGACGAAACGGUUU..   | 17    |
| .....GUGUGUUCUGACGAAACGGUUUU.   | 53    |
| .....GUGUGUUCUGACGAAACGGUUUUUU  | 12    |
| .....UGUGUUCUGACGAAA.....       | 4     |
| .....UGUGUUCUGACGAAAC.....      | 17    |
| .....UGUGUUCUGACGAAACG.....     | 54    |
| .....UGUGUUCUGACGAAACGG.....    | 101   |
| .....UGUGUUCUGACGAAACGGU....    | 93    |
| .....UGUGUUCUGACGAAACGGUU...    | 285   |
| .....UGUGUUCUGACGAAACGGUUU..    | 5057  |
| .....UGUGUUCUGACGAAACGGUUUU.    | 42206 |
| .....UGUGUUCUGACGAAACGGUUUUUU   | 11922 |
| .....GUGUUCUGACGAAACG.....      | 6     |
| .....GUGUUCUGACGAAACGG.....     | 6     |
| .....GUGUUCUGACGAAACGGU....     | 4     |
| .....GUGUUCUGACGAAACGGUU...     | 16    |
| .....GUGUUCUGACGAAACGGUUU..     | 96    |
| .....GUGUUCUGACGAAACGGUUUU.     | 828   |
| .....GUGUUCUGACGAAACGGUUUUUU    | 241   |
| .....UGUUCUGACGAAACGG.....      | 4     |
| .....UGUUCUGACGAAACGGU....      | 2     |
| .....UGUUCUGACGAAACGGUU...      | 6     |
| .....UGUUCUGACGAAACGGUUU..      | 33    |
| .....UGUUCUGACGAAACGGUUUU.      | 313   |
| .....UGUUCUGACGAAACGGUUUUUU     | 128   |
| .....GUUCUGACGAAACGGU....       | 2     |
| .....GUUCUGACGAAACGGUU...       | 13    |
| .....GUUCUGACGAAACGGUUU..       | 11    |
| .....GUUCUGACGAAACGGUUUU.       | 84    |
| .....GUUCUGACGAAACGGUUUUUU      | 37    |
| .....UUCUGACGAAACGGUU...        | 3     |
| .....UUCUGACGAAACGGUUU..        | 11    |
| .....UUCUGACGAAACGGUUUU.        | 38    |
| .....UUCUGACGAAACGGUUUUUU       | 8     |
| .....UCUGACGAAACGGUUU..         | 19    |
| .....UCUGACGAAACGGUUUU.         | 60    |
| .....UCUGACGAAACGGUUUUUU        | 9     |
| .....CUGACGAAACGGUUUU..         | 41    |
| .....CUGACGAAACGGUUUUUU         | 8     |
| .....UGACGAAACGGUUUUUU          | 12    |

#shLUC pRRL

|                                                          |     |
|----------------------------------------------------------|-----|
| CCGGUCCUAAGGUUAAGUCGCCUCGCGAGCGAGGGCGACUUAACCUUAGGUUUUUG |     |
| ..GGUCCUAAGGUUAAGU.....                                  | 3   |
| ..GGUCCUAAGGUUAAGUC.....                                 | 5   |
| ..GGUCCUAAGGUUAAGUCG.....                                | 12  |
| ..GGUCCUAAGGUUAAGUCGC.....                               | 4   |
| ..GGUCCUAAGGUUAAGUCGCC.....                              | 17  |
| ..GGUCCUAAGGUUAAGUCGCCC.....                             | 51  |
| ..GGUCCUAAGGUUAAGUCGCCCU.....                            | 556 |
| ..GGUCCUAAGGUUAAGUCGCCCUC.....                           | 197 |
| ..GGUCCUAAGGUUAAGUCGCCUCG.....                           | 280 |
| ...GUCCUAAGGUUAAGUCG.....                                | 2   |
| ...GUCCUAAGGUUAAGUCGCCC.....                             | 2   |
| ...GUCCUAAGGUUAAGUCGCCCU.....                            | 10  |
| ...GUCCUAAGGUUAAGUCGCCCUC.....                           | 15  |
| ...GUCCUAAGGUUAAGUCGCCUCG.....                           | 30  |
| ...UCCUAAGGUUAAGUCGCCCU.....                             | 3   |
| ...UCCUAAGGUUAAGUCGCCCUC.....                            | 9   |
| ...UCCUAAGGUUAAGUCGCCUCG.....                            | 52  |
| ...UCCUAAGGUUAAGUCGCCUCGCGUC.....                        | 2   |
| ...CCUAAGGUUAAGUCGCCCU.....                              | 3   |
| ...CCUAAGGUUAAGUCGCCCUC.....                             | 2   |
| ...CCUAAGGUUAAGUCGCCUCGCGUC.....                         | 2   |
| ...CUAAGGUUAAGUCGCCCUC.....                              | 4   |
| ...UAAGGUUAAGUCGCCCUC.....                               | 3   |
| ...UAAGGUUAAGUCGCCUCGCG.....                             | 2   |
| ...UAAGGUUAAGUCGCCUCGCGU.....                            | 2   |
| ...UAAGGUUAAGUCGCCUCGCGUC.....                           | 4   |
| ...UAAGGUUAAGUCGCCUCGCGUCG.....                          | 2   |
| ...UAAGGUUAAGUCGCCUCGCGUCGA.....                         | 5   |
| ...AAGGUUAAGUCGCCCU.....                                 | 4   |
| ...AAGGUUAAGUCGCCCUC.....                                | 2   |
| ...AAGGUUAAGUCGCCUCG.....                                | 5   |
| ...AAGGUUAAGUCGCCUCGCG.....                              | 20  |
| ...AAGGUUAAGUCGCCUCGCGU.....                             | 13  |
| ...AAGGUUAAGUCGCCUCGCGUC.....                            | 30  |
| ...AAGGUUAAGUCGCCUCGCGUCG.....                           | 4   |
| ...AAGGUUAAGUCGCCUCGCGUCGA.....                          | 13  |
| ...AGGUUAAGUCGCCCUC.....                                 | 42  |
| ...AGGUUAAGUCGCCUCG.....                                 | 6   |
| ...AGGUUAAGUCGCCUCGCG.....                               | 5   |
| ...AGGUUAAGUCGCCUCGCGU.....                              | 6   |
| ...AGGUUAAGUCGCCUCGCGUC.....                             | 5   |
| ...GGUUAAGUCGCCUCG.....                                  | 4   |
| ...GGUUAAGUCGCCUCGCG.....                                | 70  |
| ...GGUUAAGUCGCCUCGCGU.....                               | 20  |
| ...GGUUAAGUCGCCUCGCGUC.....                              | 5   |
| ...GUUAAGUCGCCUCGCG.....                                 | 11  |

|                                      |      |
|--------------------------------------|------|
| .....GUUAAGUCGCCUCGCUC.....          | 9    |
| .....GUUAAGUCGCCUCGCUCG.....         | 2    |
| .....UUAAGUCGCCUCGCUC.....           | 2    |
| .....UAAGUCGCCUCGCUC.....            | 3    |
| .....UAAGUCGCCUCGCUCGA.....          | 3    |
| .....UAAGUCGCCUCGCUCGAGC.....        | 3    |
| .....CUCGAGCGAGGGCGACUUAACCUUA.....  | 2    |
| .....UCGAGCGAGGGCGACU.....           | 6    |
| .....UCGAGCGAGGGCGACUU.....          | 17   |
| .....UCGAGCGAGGGCGACUUA.....         | 5    |
| .....UCGAGCGAGGGCGACUUA.....         | 21   |
| .....UCGAGCGAGGGCGACUUAAC.....       | 3    |
| .....UCGAGCGAGGGCGACUUAACCUUA.....   | 6    |
| .....UCGAGCGAGGGCGACUUAACCUUAG.....  | 4    |
| .....CGAGCGAGGGCGACUU.....           | 2    |
| .....CGAGCGAGGGCGACUUA.....          | 3    |
| .....CGAGCGAGGGCGACUUA.....          | 36   |
| .....CGAGCGAGGGCGACUUAAC.....        | 2    |
| .....CGAGCGAGGGCGACUUAACCUUA.....    | 12   |
| .....CGAGCGAGGGCGACUUAACCUUAG.....   | 2    |
| .....GAGCGAGGGCGACUUA.....           | 3    |
| .....GAGCGAGGGCGACUUAACCUUAG.....    | 2    |
| .....GCGAGGGCGACUUAACCUUAGG.....     | 4    |
| .....GCGAGGGCGACUUAACCUUAGGU.....    | 28   |
| .....GCGAGGGCGACUUAACCUUAGGUU.....   | 8    |
| .....GCGAGGGCGACUUAACCUUAGGUUU.....  | 3    |
| .....GCGAGGGCGACUUAACCUUAGGUUUU..... | 3    |
| .....CGAGGGCGACUUAACCUUAGGU.....     | 2    |
| .....CGAGGGCGACUUAACCUUAGGUU.....    | 2    |
| .....GAGGGCGACUUAACCUUAGGUUU.....    | 9    |
| .....GAGGGCGACUUAACCUUAGGUUUU.....   | 5    |
| .....AGGGCGACUUAACCUUAGG.....        | 2    |
| .....AGGGCGACUUAACCUUAGGU.....       | 5    |
| .....AGGGCGACUUAACCUUAGGUU.....      | 76   |
| .....AGGGCGACUUAACCUUAGGUUU.....     | 1115 |
| .....AGGGCGACUUAACCUUAGGUUUU.....    | 260  |
| .....AGGGCGACUUAACCUUAGGUUUUU.....   | 46   |
| .....GGGCGACUUAACCUUAGGUU.....       | 4    |
| .....GGGCGACUUAACCUUAGGUUU.....      | 47   |
| .....GGGCGACUUAACCUUAGGUUUU.....     | 49   |
| .....GGGCGACUUAACCUUAGGUUUUU.....    | 12   |
| .....GGCGACUUAACCUUAGGUU.....        | 3    |
| .....GGCGACUUAACCUUAGGUUU.....       | 17   |
| .....GGCGACUUAACCUUAGGUUUU.....      | 29   |
| .....GGCGACUUAACCUUAGGUUUUU.....     | 22   |
| .....GCGACUUAACCUUAGGU.....          | 2    |
| .....GCGACUUAACCUUAGGUUU.....        | 7    |

|                             |   |
|-----------------------------|---|
| .....GCGACUUAACCUUAGGUUUU.. | 4 |
| .....GCGACUUAACCUUAGGUUUUU. | 3 |
| .....CGACUUAACCUUAGGUUU...  | 2 |
| .....CGACUUAACCUUAGGUUUUU.  | 2 |
| .....GACUUAACCUUAGGUU...    | 2 |
| .....GACUUAACCUUAGGUUU...   | 5 |
| .....GACUUAACCUUAGGUUUU..   | 4 |
| .....ACUUAACCUUAGGUUU...    | 5 |
| .....ACUUAACCUUAGGUUUU..    | 3 |
| .....ACUUAACCUUAGGUUUUU.    | 2 |

**#pSUPER Scr**

|                                                                     |     |
|---------------------------------------------------------------------|-----|
| CCACAGAUCCCCGCGAAAGAUGAUAAAGCUAAUUC AAGAGAUUAGCUUAUCAUCUUUCGCUUUUUA |     |
| .....CCCCGCGAAAGAUGAUAAAGCU.....                                    | 4   |
| .....CCCCGCGAAAGAUGAUAAAGCUA.....                                   | 4   |
| .....CCCGCGAAAGAUGAUAA.....                                         | 2   |
| .....CCCGCGAAAGAUGAUAAAG.....                                       | 3   |
| .....CCCGCGAAAGAUGAUAAAGCU.....                                     | 2   |
| .....CCCGCGAAAGAUGAUAAAGCUA.....                                    | 24  |
| .....CCCGCGAAAGAUGAUAAAGCUAA.....                                   | 155 |
| .....CCCGCGAAAGAUGAUAAAGCUAAU.....                                  | 36  |
| .....CCCGCGAAAGAUGAUAAAGCUAAUU.....                                 | 7   |
| .....CCGCGAAAGAUGAUAAAG.....                                        | 2   |
| .....CCGCGAAAGAUGAUAAAGCU.....                                      | 5   |
| .....CCGCGAAAGAUGAUAAAGCUA.....                                     | 8   |
| .....CCGCGAAAGAUGAUAAAGCUAA.....                                    | 27  |
| .....CCGCGAAAGAUGAUAAAGCUAAU.....                                   | 224 |
| .....CCGCGAAAGAUGAUAAAGCUAAUU.....                                  | 48  |
| .....CGCGAAAGAUGAUAAAG.....                                         | 3   |
| .....CGCGAAAGAUGAUAAAGC.....                                        | 2   |
| .....CGCGAAAGAUGAUAAAGCU.....                                       | 8   |
| .....CGCGAAAGAUGAUAAAGCUA.....                                      | 12  |
| .....CGCGAAAGAUGAUAAAGCUAA.....                                     | 34  |
| .....CGCGAAAGAUGAUAAAGCUAAU.....                                    | 89  |
| .....CGCGAAAGAUGAUAAAGCUAAUU.....                                   | 274 |
| .....CGCGAAAGAUGAUAAAGCUAAUUC.....                                  | 3   |
| .....CGCGAAAGAUGAUAAAGCUAAUUCA.....                                 | 3   |
| .....GCGAAAGAUGAUAAAGC.....                                         | 17  |
| .....GCGAAAGAUGAUAAAGCU.....                                        | 78  |
| .....GCGAAAGAUGAUAAAGCUA.....                                       | 97  |
| .....GCGAAAGAUGAUAAAGCUAA.....                                      | 200 |
| .....GCGAAAGAUGAUAAAGCUAAU.....                                     | 35  |
| .....GCGAAAGAUGAUAAAGCUAAUU.....                                    | 120 |
| .....GCGAAAGAUGAUAAAGCUAAUUC.....                                   | 11  |
| .....GCGAAAGAUGAUAAAGCUAAUUCAAG.....                                | 2   |
| .....GCGAAAGAUGAUAAAGCUAAUUCAAGA.....                               | 2   |
| .....GCGAAAGAUGAUAAAGCUAAUUCAAGAG.....                              | 3   |

|                                       |      |
|---------------------------------------|------|
| .....CGAAAGAUGAUAAGCU.....            | 3    |
| .....CGAAAGAUGAUAAGCUAA.....          | 2    |
| .....CGAAAGAUGAUAAGCUAAU.....         | 3    |
| .....GAAAGAUGAUAAGCUAA.....           | 3    |
| .....GAAAGAUGAUAAGCUAAUUC.....        | 2    |
| .....GAUGAUAAGCUAAUUC AAGAGA.....     | 2    |
| .....AUUCAAGAGAUUAGCU.....            | 2    |
| .....AUUCAAGAGAUUAGCUU.....           | 2    |
| .....AUUCAAGAGAUUAGCUUAUC.....        | 3    |
| .....AUUCAAGAGAUUAGCUUAUCAUCU.....    | 4    |
| .....AUUCAAGAGAUUAGCUUAUCAUCUUU.....  | 6    |
| .....AUUCAAGAGAUUAGCUUAUCAUCUUUC..... | 2    |
| .....UUCAAGAGAUUAGCUUAUCAUCU.....     | 3    |
| .....UUCAAGAGAUUAGCUUAUCAUCUUU.....   | 5    |
| .....UUCAAGAGAUUAGCUUAUCAUCUUUC.....  | 2    |
| .....UCAAGAGAUUAGCUUAUCAUCUUU.....    | 2    |
| .....CAAGAGAUUAGCUUAUCAUCUUUCGCU..... | 2    |
| .....AAGAGAUUAGCUUAUCAUCUUUCGCUU..... | 9    |
| .....AGAGAUUAGCUUAUCAU.....           | 4    |
| .....AGAGAUUAGCUUAUCAUCUUUCGCUU.....  | 2    |
| .....AGAGAUUAGCUUAUCAUCUUUCGCUUU..... | 3    |
| .....GAGAUUAGCUUAUCAUCUUUCGCU.....    | 2    |
| .....GAGAUUAGCUUAUCAUCUUUCGCUU.....   | 7    |
| .....GAGAUUAGCUUAUCAUCUUUCGCUUU.....  | 55   |
| .....GAGAUUAGCUUAUCAUCUUUCGCUUUU..... | 2    |
| .....AGAUUAGCUUAUCAUCUUU.....         | 2    |
| .....AGAUUAGCUUAUCAUCUUUCGCUU.....    | 3    |
| .....AGAUUAGCUUAUCAUCUUUCGCUUU.....   | 18   |
| .....AGAUUAGCUUAUCAUCUUUCGCUUUU.....  | 4    |
| .....GAUUAGCUUAUCAUCUU.....           | 6    |
| .....GAUUAGCUUAUCAUCUUUCG.....        | 2    |
| .....GAUUAGCUUAUCAUCUUUCGCU.....      | 3    |
| .....GAUUAGCUUAUCAUCUUUCGCUU.....     | 47   |
| .....GAUUAGCUUAUCAUCUUUCGCUUU.....    | 226  |
| .....GAUUAGCUUAUCAUCUUUCGCUUUU.....   | 3    |
| .....AUUAGCUUAUCAUCUUUCGCUU.....      | 11   |
| .....AUUAGCUUAUCAUCUUUCGCUUU.....     | 65   |
| .....UUAGCUUAUCAUCUUUC.....           | 2    |
| .....UUAGCUUAUCAUCUUUCG.....          | 6    |
| .....UUAGCUUAUCAUCUUUCGCU.....        | 41   |
| .....UUAGCUUAUCAUCUUUCGCUU.....       | 701  |
| .....UUAGCUUAUCAUCUUUCGCUUU.....      | 5425 |
| .....UUAGCUUAUCAUCUUUCGCUUUU.....     | 46   |
| .....UUAGCUUAUCAUCUUUCGCUUUUU.....    | 4    |
| .....UAGCUUAUCAUCUUUC.....            | 2    |
| .....UAGCUUAUCAUCUUUCGCU.....         | 5    |
| .....UAGCUUAUCAUCUUUCGCUU.....        | 39   |

|                               |     |
|-------------------------------|-----|
| .....UAGCUUAUCAUCUUUCGCUUU... | 403 |
| .....UAGCUUAUCAUCUUUCGCUUUU.. | 38  |
| .....AGCUUAUCAUCUUUCGCUU....  | 7   |
| .....AGCUUAUCAUCUUUCGCUUU...  | 16  |
| .....AGCUUAUCAUCUUUCGCUUUU..  | 5   |
| .....GCUUAUCAUCUUUCGCUU....   | 2   |
| .....GCUUAUCAUCUUUCGCUUU...   | 3   |
| .....CUUAUCAUCUUUCGCU.....    | 3   |
| .....CUUAUCAUCUUUCGCUU....    | 3   |
| .....CUUAUCAUCUUUCGCUUU...    | 12  |
| .....UUAUCAUCUUUCGCUU....     | 24  |
| .....UUAUCAUCUUUCGCUUU...     | 47  |
| .....UAUCAUCUUUCGCUUU...      | 39  |
| .....UAUCAUCUUUCGCUUUU..      | 2   |

**#pSUPER GFP**

|                                                                   |      |
|-------------------------------------------------------------------|------|
| CCACAGAUCCCCGGCACAAGCUGGAGUACAAUUCAAGAGAUUGUACUCCAGCUUGUGCCUUUUUA |      |
| .....AUCCCCGGCACAAGCUGGAGUA.....                                  | 2    |
| .....AUCCCCGGCACAAGCUGGAGUAC.....                                 | 3    |
| .....CCCCGGCACAAGCUGGAGUACA.....                                  | 5    |
| .....CCCCGGCACAAGCUGGAGUACAA.....                                 | 8    |
| .....CCCGGCACAAGCUGGAGUA.....                                     | 2    |
| .....CCCGGCACAAGCUGGAGUAC.....                                    | 13   |
| .....CCCGGCACAAGCUGGAGUACA.....                                   | 52   |
| .....CCCGGCACAAGCUGGAGUACAA.....                                  | 287  |
| .....CCCGGCACAAGCUGGAGUACAAU.....                                 | 181  |
| .....CCCGGCACAAGCUGGAGUACAAUU.....                                | 30   |
| .....CCCGGCACAAGCUGGAGUACAAUUC.....                               | 2    |
| .....CCGGCACAAGCUGGAG.....                                        | 3    |
| .....CCGGCACAAGCUGGAGU.....                                       | 2    |
| .....CCGGCACAAGCUGGAGUA.....                                      | 3    |
| .....CCGGCACAAGCUGGAGUAC.....                                     | 9    |
| .....CCGGCACAAGCUGGAGUACA.....                                    | 9    |
| .....CCGGCACAAGCUGGAGUACAA.....                                   | 109  |
| .....CCGGCACAAGCUGGAGUACAAU.....                                  | 1097 |
| .....CCGGCACAAGCUGGAGUACAAUU.....                                 | 108  |
| .....CCGGCACAAGCUGGAGUACAAUUC.....                                | 2    |
| .....CGGCACAAGCUGGAGU.....                                        | 5    |
| .....CGGCACAAGCUGGAGUA.....                                       | 10   |
| .....CGGCACAAGCUGGAGUAC.....                                      | 38   |
| .....CGGCACAAGCUGGAGUACA.....                                     | 45   |
| .....CGGCACAAGCUGGAGUACAA.....                                    | 120  |
| .....CGGCACAAGCUGGAGUACAAU.....                                   | 281  |
| .....CGGCACAAGCUGGAGUACAAUU.....                                  | 782  |
| .....CGGCACAAGCUGGAGUACAAUUC.....                                 | 86   |
| .....CGGCACAAGCUGGAGUACAAUUCA.....                                | 13   |
| .....CGGCACAAGCUGGAGUACAAUUCA.....                                | 2    |



|                                       |     |
|---------------------------------------|-----|
| .....CGGCACAAGCUGGAGUACAAUUCAAG.....  | 2   |
| .....GGCACAAGCUGGAGUA.....            | 28  |
| .....GGCACAAGCUGGAGUAC.....           | 106 |
| .....GGCACAAGCUGGAGUACA.....          | 143 |
| .....GGCACAAGCUGGAGUACAA.....         | 401 |
| .....GGCACAAGCUGGAGUACAAU.....        | 185 |
| .....GGCACAAGCUGGAGUACAAUU.....       | 415 |
| .....GGCACAAGCUGGAGUACAAUUC.....      | 39  |
| .....GGCACAAGCUGGAGUACAAUUCA.....     | 7   |
| .....GGCACAAGCUGGAGUACAAUUCAA.....    | 3   |
| .....GGCACAAGCUGGAGUACAAUUCAAGA.....  | 6   |
| .....GGCACAAGCUGGAGUACAAUUCAAGAG..... | 6   |
| .....GCACAAGCUGGAGUAC.....            | 2   |
| .....GCACAAGCUGGAGUACA.....           | 5   |
| .....GCACAAGCUGGAGUACAA.....          | 8   |
| .....GCACAAGCUGGAGUACAAUU.....        | 5   |
| .....GCACAAGCUGGAGUACAAUUC.....       | 4   |
| .....CACAAGCUGGAGUACAA.....           | 6   |
| .....CACAAGCUGGAGUACAAU.....          | 3   |
| .....CACAAGCUGGAGUACAAUU.....         | 4   |
| .....CACAAGCUGGAGUACAAUUC.....        | 2   |
| .....ACAAGCUGGAGUACAA.....            | 6   |
| .....ACAAGCUGGAGUACAAU.....           | 13  |
| .....ACAAGCUGGAGUACAAUU.....          | 4   |
| .....ACAAGCUGGAGUACAAUUCAAGAGAU.....  | 2   |
| .....CAAGCUGGAGUACAAU.....            | 9   |
| .....CAAGCUGGAGUACAAUUC.....          | 9   |
| .....AAGCUGGAGUACAAUU.....            | 2   |
| .....AAGCUGGAGUACAAUUC.....           | 2   |
| .....CUGGAGUACAAUUCAAGAGA.....        | 4   |
| .....UGGAGUACAAUUCAAGAGA.....         | 2   |
| .....UGGAGUACAAUUCAAGAGAUUGUAC.....   | 3   |
| .....GAGUACAAUUCAAGAGAU.....          | 4   |
| .....GAGUACAAUUCAAGAGAUU.....         | 3   |
| .....GAGUACAAUUCAAGAGAUUG.....        | 2   |
| .....GAGUACAAUUCAAGAGAUUGUA.....      | 3   |
| .....GAGUACAAUUCAAGAGAUUGUAC.....     | 4   |
| .....GAGUACAAUUCAAGAGAUUGUACU.....    | 2   |
| .....AGUACAAUUCAAGAGAUUG.....         | 2   |
| .....AGUACAAUUCAAGAGAUUGU.....        | 2   |
| .....AGUACAAUUCAAGAGAUUGUA.....       | 2   |
| .....GUACAAUUCAAGAGAU.....            | 2   |
| .....UACAAUUCAAGAGAUUG.....           | 2   |
| .....CAAUUCAAGAGAUUGUA.....           | 5   |
| .....CAAUUCAAGAGAUUGUACU.....         | 3   |
| .....CAAUUCAAGAGAUUGUACUC.....        | 3   |
| .....AAUUCAAGAGAUUGUA.....            | 15  |

|                                       |    |
|---------------------------------------|----|
| .....AAUUCAAGAGAUUGUAC.....           | 15 |
| .....AAUUCAAGAGAUUGUACU.....          | 7  |
| .....AAUUCAAGAGAUUGUACUC.....         | 9  |
| .....AAUUCAAGAGAUUGUACUCCAG.....      | 3  |
| .....AAUUCAAGAGAUUGUACUCCAGCUU.....   | 4  |
| .....AAUUCAAGAGAUUGUACUCCAGCUUG.....  | 10 |
| .....AAUUCAAGAGAUUGUACUCCAGCUUGU..... | 5  |
| .....AUUCAAGAGAUUGUAC.....            | 5  |
| .....AUUCAAGAGAUUGUACU.....           | 4  |
| .....AUUCAAGAGAUUGUACUC.....          | 3  |
| .....AUUCAAGAGAUUGUACUCCAGCU.....     | 2  |
| .....AUUCAAGAGAUUGUACUCCAGCUU.....    | 10 |
| .....AUUCAAGAGAUUGUACUCCAGCUUG.....   | 12 |
| .....AUUCAAGAGAUUGUACUCCAGCUUGU.....  | 8  |
| .....AUUCAAGAGAUUGUACUCCAGCUUGUG..... | 22 |
| .....UUCAAGAGAUUGUACU.....            | 4  |
| .....UUCAAGAGAUUGUACUC.....           | 6  |
| .....UUCAAGAGAUUGUACUCC.....          | 4  |
| .....UUCAAGAGAUUGUACUCCAG.....        | 3  |
| .....UUCAAGAGAUUGUACUCCAGCU.....      | 5  |
| .....UUCAAGAGAUUGUACUCCAGCUU.....     | 9  |
| .....UUCAAGAGAUUGUACUCCAGCUUG.....    | 7  |
| .....UUCAAGAGAUUGUACUCCAGCUUGU.....   | 10 |
| .....UUCAAGAGAUUGUACUCCAGCUUGUG.....  | 16 |
| .....UUCAAGAGAUUGUACUCCAGCUUGUGC..... | 4  |
| .....UCAAGAGAUUGUACUC.....            | 10 |
| .....UCAAGAGAUUGUACUCC.....           | 3  |
| .....UCAAGAGAUUGUACUCCA.....          | 7  |
| .....UCAAGAGAUUGUACUCCAG.....         | 8  |
| .....UCAAGAGAUUGUACUCCAGC.....        | 3  |
| .....UCAAGAGAUUGUACUCCAGCU.....       | 3  |
| .....UCAAGAGAUUGUACUCCAGCUU.....      | 10 |
| .....UCAAGAGAUUGUACUCCAGCUUG.....     | 14 |
| .....UCAAGAGAUUGUACUCCAGCUUGU.....    | 9  |
| .....UCAAGAGAUUGUACUCCAGCUUGUG.....   | 12 |
| .....UCAAGAGAUUGUACUCCAGCUUGUGC.....  | 7  |
| .....CAAGAGAUUGUACUCCAG.....          | 2  |
| .....CAAGAGAUUGUACUCCAGCU.....        | 2  |
| .....CAAGAGAUUGUACUCCAGCUU.....       | 2  |
| .....CAAGAGAUUGUACUCCAGCUUG.....      | 4  |
| .....CAAGAGAUUGUACUCCAGCUUGUG.....    | 5  |
| .....CAAGAGAUUGUACUCCAGCUUGUGC.....   | 4  |
| .....CAAGAGAUUGUACUCCAGCUUGGCCU.....  | 2  |
| .....AAGAGAUUGUACUCCAG.....           | 2  |
| .....AAGAGAUUGUACUCCAGCU.....         | 2  |
| .....AAGAGAUUGUACUCCAGCUU.....        | 2  |
| .....AAGAGAUUGUACUCCAGCUUGU.....      | 2  |

|                                       |      |
|---------------------------------------|------|
| .....AAGAGAUUGUACUCCAGCUUGUGC.....    | 4    |
| .....AAGAGAUUGUACUCCAGCUUGUGCCU.....  | 5    |
| .....AAGAGAUUGUACUCCAGCUUGUGCCUU..... | 33   |
| .....AGAGAUUGUACUCCAG.....            | 3    |
| .....AGAGAUUGUACUCCAGC.....           | 2    |
| .....AGAGAUUGUACUCCAGCUUGUG.....      | 3    |
| .....AGAGAUUGUACUCCAGCUUGUGCCU.....   | 2    |
| .....AGAGAUUGUACUCCAGCUUGUGCCUU.....  | 7    |
| .....AGAGAUUGUACUCCAGCUUGUGCCUUU..... | 12   |
| .....GAGAUUGUACUCCAGCUUGUGC.....      | 2    |
| .....GAGAUUGUACUCCAGCUUGUGCCU.....    | 4    |
| .....GAGAUUGUACUCCAGCUUGUGCCUU.....   | 22   |
| .....GAGAUUGUACUCCAGCUUGUGCCUUU.....  | 40   |
| .....GAGAUUGUACUCCAGCUUGUGCCUUUU..... | 4    |
| .....AGAUUGUACUCCAGCU.....            | 6    |
| .....AGAUUGUACUCCAGCUU.....           | 4    |
| .....AGAUUGUACUCCAGCUUG.....          | 3    |
| .....AGAUUGUACUCCAGCUUGUG.....        | 3    |
| .....AGAUUGUACUCCAGCUUGUGC.....       | 2    |
| .....AGAUUGUACUCCAGCUUGUGCC.....      | 2    |
| .....AGAUUGUACUCCAGCUUGUGCCU.....     | 5    |
| .....AGAUUGUACUCCAGCUUGUGCCUU.....    | 13   |
| .....AGAUUGUACUCCAGCUUGUGCCUUU.....   | 14   |
| .....AGAUUGUACUCCAGCUUGUGCCUUUU.....  | 6    |
| .....AGAUUGUACUCCAGCUUGUGCCUUUUU..... | 4    |
| .....GAUUGUACUCCAGCUU.....            | 2    |
| .....GAUUGUACUCCAGCUUG.....           | 2    |
| .....GAUUGUACUCCAGCUUGU.....          | 2    |
| .....GAUUGUACUCCAGCUUGUG.....         | 4    |
| .....GAUUGUACUCCAGCUUGUGC.....        | 2    |
| .....GAUUGUACUCCAGCUUGUGCCU.....      | 14   |
| .....GAUUGUACUCCAGCUUGUGCCUU.....     | 101  |
| .....GAUUGUACUCCAGCUUGUGCCUUU.....    | 139  |
| .....GAUUGUACUCCAGCUUGUGCCUUUU.....   | 6    |
| .....AUUGUACUCCAGCUUG.....            | 4    |
| .....AUUGUACUCCAGCUUGUGCC.....        | 2    |
| .....AUUGUACUCCAGCUUGUGCCU.....       | 10   |
| .....AUUGUACUCCAGCUUGUGCCUU.....      | 47   |
| .....AUUGUACUCCAGCUUGUGCCUUU.....     | 47   |
| .....UUGUACUCCAGCUUGU.....            | 3    |
| .....UUGUACUCCAGCUUGUG.....           | 7    |
| .....UUGUACUCCAGCUUGUGC.....          | 6    |
| .....UUGUACUCCAGCUUGUGCC.....         | 14   |
| .....UUGUACUCCAGCUUGUGCCU.....        | 101  |
| .....UUGUACUCCAGCUUGUGCCUU.....       | 1189 |
| .....UUGUACUCCAGCUUGUGCCUUU.....      | 1932 |
| .....UUGUACUCCAGCUUGUGCCUUUU.....     | 41   |

|                                 |      |
|---------------------------------|------|
| .....UUGUACUCCAGCUUGUGCCUUUUU.  | 3    |
| .....UGUACUCCAGCUUGUG.....      | 17   |
| .....UGUACUCCAGCUUGUGC.....     | 8    |
| .....UGUACUCCAGCUUGUGCC.....    | 10   |
| .....UGUACUCCAGCUUGUGCCU.....   | 66   |
| .....UGUACUCCAGCUUGUGCCUU.....  | 442  |
| .....UGUACUCCAGCUUGUGCCUUU..... | 2046 |
| .....UGUACUCCAGCUUGUGCCUUUU..   | 621  |
| .....UGUACUCCAGCUUGUGCCUUUUU.   | 76   |
| .....GUACUCCAGCUUGUGC.....      | 3    |
| .....GUACUCCAGCUUGUGCC.....     | 2    |
| .....GUACUCCAGCUUGUGCCU.....    | 18   |
| .....GUACUCCAGCUUGUGCCUU.....   | 68   |
| .....GUACUCCAGCUUGUGCCUUU.....  | 214  |
| .....GUACUCCAGCUUGUGCCUUUU..    | 83   |
| .....GUACUCCAGCUUGUGCCUUUUU.    | 31   |
| .....GUACUCCAGCUUGUGCCUUUUUA    | 2    |
| .....UACUCCAGCUUGUGCC.....      | 2    |
| .....UACUCCAGCUUGUGCCU.....     | 3    |
| .....UACUCCAGCUUGUGCCUU.....    | 17   |
| .....UACUCCAGCUUGUGCCUUU.....   | 38   |
| .....UACUCCAGCUUGUGCCUUUU..     | 36   |
| .....UACUCCAGCUUGUGCCUUUUU.     | 50   |
| .....ACUCCAGCUUGUGCCU.....      | 26   |
| .....ACUCCAGCUUGUGCCUU.....     | 46   |
| .....ACUCCAGCUUGUGCCUUU.....    | 45   |
| .....ACUCCAGCUUGUGCCUUUU..      | 10   |
| .....ACUCCAGCUUGUGCCUUUUU.      | 2    |
| .....CUCCAGCUUGUGCCUU.....      | 43   |
| .....CUCCAGCUUGUGCCUUU.....     | 28   |
| .....CUCCAGCUUGUGCCUUUU..       | 6    |
| .....CUCCAGCUUGUGCCUUUUU.       | 2    |
| .....UCCAGCUUGUGCCUUU.....      | 58   |
| .....UCCAGCUUGUGCCUUUU..        | 4    |
| .....CCAGCUUGUGCCUUUU..         | 10   |
| .....CCAGCUUGUGCCUUUUU.         | 3    |
| .....CAGCUUGUGCCUUUUU.          | 4    |

**#pSUPER macroH2A1**

|                                                                    |    |
|--------------------------------------------------------------------|----|
| CCACAGAUCCCCGGGUGCAGACAAAUGUGAAUUC AAGAGAUUCACAUUUGUCUGCACCCUUUUUA |    |
| .....CCCGGGUGCAGACAAA.....                                         | 2  |
| .....CCCGGGUGCAGACAAAUGUG.....                                     | 4  |
| .....CCCGGGUGCAGACAAAUGUGA.....                                    | 9  |
| .....CCCGGGUGCAGACAAAUGUGAA.....                                   | 42 |
| .....CCCGGGUGCAGACAAAUGUGAAU.....                                  | 23 |
| .....CCCGGGUGCAGACAAAUGUGAAUU.....                                 | 4  |
| .....CCCGGGUGCAGACAAAUGU.....                                      | 7  |

|                                       |     |
|---------------------------------------|-----|
| .....CCGGGUGCAGACAAAUGUG.....         | 6   |
| .....CCGGGUGCAGACAAAUGUGA.....        | 10  |
| .....CCGGGUGCAGACAAAUGUGAA.....       | 51  |
| .....CCGGGUGCAGACAAAUGUGAAU.....      | 665 |
| .....CCGGGUGCAGACAAAUGUGAAUU.....     | 61  |
| .....CGGGUGCAGACAAAUG.....            | 6   |
| .....CGGGUGCAGACAAAUGU.....           | 12  |
| .....CGGGUGCAGACAAAUGUG.....          | 28  |
| .....CGGGUGCAGACAAAUGUGA.....         | 29  |
| .....CGGGUGCAGACAAAUGUGAA.....        | 102 |
| .....CGGGUGCAGACAAAUGUGAAU.....       | 246 |
| .....CGGGUGCAGACAAAUGUGAAUU.....      | 755 |
| .....CGGGUGCAGACAAAUGUGAAUUC.....     | 23  |
| .....CGGGUGCAGACAAAUGUGAAUUCA.....    | 9   |
| .....CGGGUGCAGACAAAUGUGAAUUCAA.....   | 2   |
| .....CGGGUGCAGACAAAUGUGAAUUCAAG.....  | 5   |
| .....CGGGUGCAGACAAAUGUGAAUUCAAGA..... | 2   |
| .....GGGUGCAGACAAAUGU.....            | 64  |
| .....GGGUGCAGACAAAUGUG.....           | 142 |
| .....GGGUGCAGACAAAUGUGA.....          | 167 |
| .....GGGUGCAGACAAAUGUGAA.....         | 671 |
| .....GGGUGCAGACAAAUGUGAAU.....        | 189 |
| .....GGGUGCAGACAAAUGUGAAUU.....       | 132 |
| .....GGGUGCAGACAAAUGUGAAUUC.....      | 50  |
| .....GGGUGCAGACAAAUGUGAAUUCA.....     | 6   |
| .....GGGUGCAGACAAAUGUGAAUUCAA.....    | 8   |
| .....GGGUGCAGACAAAUGUGAAUUCAAG.....   | 13  |
| .....GGGUGCAGACAAAUGUGAAUUCAAGA.....  | 16  |
| .....GGGUGCAGACAAAUGUGAAUUCAAGAG..... | 16  |
| .....GGUGCAGACAAAUGUGAA.....          | 8   |
| .....GGUGCAGACAAAUGUGAAU.....         | 3   |
| .....GUGCAGACAAAUGUGA.....            | 7   |
| .....GUGCAGACAAAUGUGAA.....           | 8   |
| .....GUGCAGACAAAUGUGAAUU.....         | 6   |
| .....GUGCAGACAAAUGUGAAUUCAAGA.....    | 2   |
| .....UGCAGACAAAUGUGAA.....            | 3   |
| .....UGCAGACAAAUGUGAAU.....           | 4   |
| .....UGCAGACAAAUGUGAAUU.....          | 2   |
| .....UGCAGACAAAUGUGAAUUCAAGA.....     | 4   |
| .....UGCAGACAAAUGUGAAUUCAAGAGA.....   | 2   |
| .....CAGACAAAUGUGAAUUCAAG.....        | 2   |
| .....CAGACAAAUGUGAAUUCAAGAG.....      | 2   |
| .....AGACAAAUGUGAAUUCAAGAG.....       | 2   |
| .....GACAAAUGUGAAUUCAAGAG.....        | 3   |
| .....GACAAAUGUGAAUUCAAGAGA.....       | 3   |
| .....GACAAAUGUGAAUUCAAGAGAU.....      | 5   |
| .....ACAAAUGUGAAUUCAAGA.....          | 2   |

|                                       |    |
|---------------------------------------|----|
| .....ACAAAUGUGAAUUCAAGAG.....         | 4  |
| .....ACAAAUGUGAAUUCAAGAGAU.....       | 6  |
| .....ACAAAUGUGAAUUCAAGAGAAU.....      | 2  |
| .....ACAAAUGUGAAUUCAAGAGAUUCACA.....  | 3  |
| .....ACAAAUGUGAAUUCAAGAGAUUCACAU..... | 3  |
| .....CAAUGUGAAUUCAAGA.....            | 2  |
| .....CAAUGUGAAUUCAAGAG.....           | 3  |
| .....CAAUGUGAAUUCAAGAGA.....          | 2  |
| .....CAAUGUGAAUUCAAGAGAUUCACAU.....   | 2  |
| .....AAAUGUGAAUUCAAGA.....            | 3  |
| .....AAAUGUGAAUUCAAGAG.....           | 3  |
| .....AAAUGUGAAUUCAAGAGA.....          | 2  |
| .....AAAUGUGAAUUCAAGAGAU.....         | 6  |
| .....AAAUGUGAAUUCAAGAGAAU.....        | 9  |
| .....AAAUGUGAAUUCAAGAGAUUCAC.....     | 6  |
| .....AAAUGUGAAUUCAAGAGAUUCACA.....    | 6  |
| .....AAAUGUGAAUUCAAGAGAUUCACAU.....   | 2  |
| .....AAAUGUGAAUUCAAGAGAUUCACAUU.....  | 2  |
| .....AAUGUGAAUUCAAGAG.....            | 2  |
| .....AAUGUGAAUUCAAGAGAU.....          | 2  |
| .....AAUGUGAAUUCAAGAGAAU.....         | 6  |
| .....AAUGUGAAUUCAAGAGAUUCAC.....      | 6  |
| .....AAUGUGAAUUCAAGAGAUUCACA.....     | 2  |
| .....AUGUGAAUUCAAGAGA.....            | 4  |
| .....AUGUGAAUUCAAGAGAU.....           | 2  |
| .....AUGUGAAUUCAAGAGAAU.....          | 2  |
| .....AUGUGAAUUCAAGAGAUUCAC.....       | 2  |
| .....UGUGAAUUCAAGAGAU.....            | 3  |
| .....UGUGAAUUCAAGAGAAUUC.....         | 2  |
| .....GUGAAUUCAAGAGAAU.....            | 5  |
| .....GUGAAUUCAAGAGAAUUC.....          | 4  |
| .....UGAAUUCAAGAGAAUUC.....           | 2  |
| .....UGAAUUCAAGAGAAUUCAC.....         | 2  |
| .....UGAAUUCAAGAGAAUUCACA.....        | 5  |
| .....GAAUUCAAGAGAAUUC.....            | 7  |
| .....GAAUUCAAGAGAAUUCAC.....          | 16 |
| .....GAAUUCAAGAGAAUUCACA.....         | 2  |
| .....GAAUUCAAGAGAAUUCACAU.....        | 2  |
| .....GAAUUCAAGAGAAUUCACAUU.....       | 2  |
| .....GAAUUCAAGAGAAUUCACAUUUGUCUG..... | 3  |
| .....AAUUCAAGAGAAUUCAC.....           | 50 |
| .....AAUUCAAGAGAAUUCACA.....          | 9  |
| .....AAUUCAAGAGAAUUCACAU.....         | 16 |
| .....AAUUCAAGAGAAUUCACAUU.....        | 11 |
| .....AAUUCAAGAGAAUUCACAUUU.....       | 4  |
| .....AAUUCAAGAGAAUUCACAUUUGU.....     | 3  |
| .....AAUUCAAGAGAAUUCACAUUUGUCU.....   | 5  |

|                                       |    |
|---------------------------------------|----|
| .....AAUUCAAGAGAUUCACAUUUGUCUG.....   | 7  |
| .....AAUUCAAGAGAUUCACAUUUGUCUGC.....  | 6  |
| .....AAUUCAAGAGAUUCACAUUUGUCUGCA..... | 10 |
| .....AUUCAAGAGAUUCACA.....            | 5  |
| .....AUUCAAGAGAUUCACAU.....           | 6  |
| .....AUUCAAGAGAUUCACAUU.....          | 6  |
| .....AUUCAAGAGAUUCACAUUU.....         | 6  |
| .....AUUCAAGAGAUUCACAUUUG.....        | 2  |
| .....AUUCAAGAGAUUCACAUUUGU.....       | 5  |
| .....AUUCAAGAGAUUCACAUUUGUC.....      | 3  |
| .....AUUCAAGAGAUUCACAUUUGUCUG.....    | 15 |
| .....AUUCAAGAGAUUCACAUUUGUCUGC.....   | 6  |
| .....AUUCAAGAGAUUCACAUUUGUCUGCA.....  | 13 |
| .....AUUCAAGAGAUUCACAUUUGUCUGCAC..... | 21 |
| .....UUCAAGAGAUUCACAU.....            | 4  |
| .....UUCAAGAGAUUCACAUU.....           | 2  |
| .....UUCAAGAGAUUCACAUUU.....          | 2  |
| .....UUCAAGAGAUUCACAUUUG.....         | 2  |
| .....UUCAAGAGAUUCACAUUUGU.....        | 6  |
| .....UUCAAGAGAUUCACAUUUGUC.....       | 2  |
| .....UUCAAGAGAUUCACAUUUGUCU.....      | 9  |
| .....UUCAAGAGAUUCACAUUUGUCUG.....     | 14 |
| .....UUCAAGAGAUUCACAUUUGUCUGC.....    | 14 |
| .....UUCAAGAGAUUCACAUUUGUCUGCA.....   | 13 |
| .....UUCAAGAGAUUCACAUUUGUCUGCAC.....  | 16 |
| .....UUCAAGAGAUUCACAUUUGUCUGCACC..... | 10 |
| .....UCAAGAGAUUCACAUU.....            | 7  |
| .....UCAAGAGAUUCACAUUU.....           | 6  |
| .....UCAAGAGAUUCACAUUUG.....          | 4  |
| .....UCAAGAGAUUCACAUUUGU.....         | 3  |
| .....UCAAGAGAUUCACAUUUGUC.....        | 3  |
| .....UCAAGAGAUUCACAUUUGUCU.....       | 2  |
| .....UCAAGAGAUUCACAUUUGUCUG.....      | 25 |
| .....UCAAGAGAUUCACAUUUGUCUGC.....     | 11 |
| .....UCAAGAGAUUCACAUUUGUCUGCA.....    | 14 |
| .....UCAAGAGAUUCACAUUUGUCUGCAC.....   | 28 |
| .....UCAAGAGAUUCACAUUUGUCUGCACC.....  | 7  |
| .....UCAAGAGAUUCACAUUUGUCUGCACCC..... | 2  |
| .....CAAGAGAUUCACAUUUGU.....          | 2  |
| .....CAAGAGAUUCACAUUUGUCU.....        | 3  |
| .....CAAGAGAUUCACAUUUGUCUG.....       | 6  |
| .....CAAGAGAUUCACAUUUGUCUGC.....      | 2  |
| .....CAAGAGAUUCACAUUUGUCUGCA.....     | 2  |
| .....CAAGAGAUUCACAUUUGUCUGCAC.....    | 6  |
| .....CAAGAGAUUCACAUUUGUCUGCACCC.....  | 2  |
| .....CAAGAGAUUCACAUUUGUCUGCACCCU..... | 10 |
| .....AAGAGAUUCACAUUUGUCUG.....        | 5  |

|                                       |     |
|---------------------------------------|-----|
| .....AAGAGAUUCACAUUUGUCUGCA.....      | 3   |
| .....AAGAGAUUCACAUUUGUCUGCAC.....     | 3   |
| .....AAGAGAUUCACAUUUGUCUGCACCCC.....  | 3   |
| .....AAGAGAUUCACAUUUGUCUGCACCCCU..... | 8   |
| .....AAGAGAUUCACAUUUGUCUGCACCCUU..... | 88  |
| .....AGAGAUUCACAUUUGUCU.....          | 2   |
| .....AGAGAUUCACAUUUGUCUGCAC.....      | 4   |
| .....AGAGAUUCACAUUUGUCUGCACCCCU.....  | 2   |
| .....AGAGAUUCACAUUUGUCUGCACCCUU.....  | 28  |
| .....AGAGAUUCACAUUUGUCUGCACCCUUU..... | 21  |
| .....GAGAUUCACAUUUGUCUG.....          | 2   |
| .....GAGAUUCACAUUUGUCUGC.....         | 3   |
| .....GAGAUUCACAUUUGUCUGCAC.....       | 2   |
| .....GAGAUUCACAUUUGUCUGCACCCCU.....   | 6   |
| .....GAGAUUCACAUUUGUCUGCACCCUU.....   | 38  |
| .....GAGAUUCACAUUUGUCUGCACCCUUU.....  | 56  |
| .....GAGAUUCACAUUUGUCUGCACCCUUUU..... | 9   |
| .....AGAUUCACAUUUGUCU.....            | 2   |
| .....AGAUUCACAUUUGUCUG.....           | 8   |
| .....AGAUUCACAUUUGUCUGCA.....         | 3   |
| .....AGAUUCACAUUUGUCUGCAC.....        | 6   |
| .....AGAUUCACAUUUGUCUGCACC.....       | 2   |
| .....AGAUUCACAUUUGUCUGCACCC.....      | 2   |
| .....AGAUUCACAUUUGUCUGCACCCCU.....    | 20  |
| .....AGAUUCACAUUUGUCUGCACCCUU.....    | 81  |
| .....AGAUUCACAUUUGUCUGCACCCUUU.....   | 48  |
| .....AGAUUCACAUUUGUCUGCACCCUUUU.....  | 16  |
| .....AGAUUCACAUUUGUCUGCACCCUUUUU..... | 2   |
| .....GAUUCACAUUUGUCUG.....            | 2   |
| .....GAUUCACAUUUGUCUGC.....           | 2   |
| .....GAUUCACAUUUGUCUGCA.....          | 7   |
| .....GAUUCACAUUUGUCUGCAC.....         | 7   |
| .....GAUUCACAUUUGUCUGCACC.....        | 2   |
| .....GAUUCACAUUUGUCUGCACCC.....       | 3   |
| .....GAUUCACAUUUGUCUGCACCCCU.....     | 12  |
| .....GAUUCACAUUUGUCUGCACCCUU.....     | 82  |
| .....GAUUCACAUUUGUCUGCACCCUUU.....    | 200 |
| .....GAUUCACAUUUGUCUGCACCCUUUU.....   | 21  |
| .....GAUUCACAUUUGUCUGCACCCUUUUU.....  | 5   |
| .....AUUCACAUUUGUCUGCA.....           | 5   |
| .....AUUCACAUUUGUCUGCAC.....          | 4   |
| .....AUUCACAUUUGUCUGCACC.....         | 2   |
| .....AUUCACAUUUGUCUGCACCC.....        | 2   |
| .....AUUCACAUUUGUCUGCACCCCU.....      | 9   |
| .....AUUCACAUUUGUCUGCACCCUU.....      | 66  |
| .....AUUCACAUUUGUCUGCACCCUUU.....     | 105 |
| .....AUUCACAUUUGUCUGCACCCUUUU.....    | 8   |



|                                 |      |
|---------------------------------|------|
| .....AUUCACAUUUGUCUGCACCCUUUUU. | 3    |
| .....UUCACAUUUGUCUGCA.....      | 5    |
| .....UUCACAUUUGUCUGCAC.....     | 7    |
| .....UUCACAUUUGUCUGCACC.....    | 6    |
| .....UUCACAUUUGUCUGCACCC.....   | 7    |
| .....UUCACAUUUGUCUGCACCCU.....  | 85   |
| .....UUCACAUUUGUCUGCACCCUU..... | 886  |
| .....UUCACAUUUGUCUGCACCCUUU...  | 3574 |
| .....UUCACAUUUGUCUGCACCCUUUU..  | 109  |
| .....UUCACAUUUGUCUGCACCCUUUUU.  | 12   |
| .....UCACAUUUGUCUGCAC.....      | 10   |
| .....UCACAUUUGUCUGCACC.....     | 6    |
| .....UCACAUUUGUCUGCACCC.....    | 2    |
| .....UCACAUUUGUCUGCACCCU.....   | 27   |
| .....UCACAUUUGUCUGCACCCUU.....  | 168  |
| .....UCACAUUUGUCUGCACCCUUU...   | 1057 |
| .....UCACAUUUGUCUGCACCCUUUU..   | 473  |
| .....UCACAUUUGUCUGCACCCUUUUU.   | 38   |
| .....CACAUUUGUCUGCACCCU.....    | 13   |
| .....CACAUUUGUCUGCACCCUU.....   | 44   |
| .....CACAUUUGUCUGCACCCUUU...    | 114  |
| .....CACAUUUGUCUGCACCCUUUU..    | 39   |
| .....CACAUUUGUCUGCACCCUUUUU.    | 8    |
| .....ACAUUUGUCUGCACCCU.....     | 16   |
| .....ACAUUUGUCUGCACCCUU.....    | 33   |
| .....ACAUUUGUCUGCACCCUUU...     | 47   |
| .....ACAUUUGUCUGCACCCUUUU..     | 18   |
| .....ACAUUUGUCUGCACCCUUUUU.     | 3    |
| .....CAUUUGUCUGCACCCU.....      | 283  |
| .....CAUUUGUCUGCACCCUU.....     | 126  |
| .....CAUUUGUCUGCACCCUUU...      | 67   |
| .....CAUUUGUCUGCACCCUUUU..      | 11   |
| .....AUUUGUCUGCACCCU.....       | 221  |
| .....AUUUGUCUGCACCCUUU...       | 188  |
| .....AUUUGUCUGCACCCUUUU..       | 26   |
| .....AUUUGUCUGCACCCUUUUU.       | 8    |
| .....UUUGUCUGCACCCUUU.....      | 74   |
| .....UUUGUCUGCACCCUUUU..        | 4    |
| .....UUUGUCUGCACCCUUUUU.        | 2    |
| .....UUGUCUGCACCCUUUU..         | 16   |
| .....UUGUCUGCACCCUUUUU.         | 2    |

**#pSUPER Scr with original H1 promoter**

|                                                               |       |
|---------------------------------------------------------------|-------|
| ccacucuucccGCGAAAGAUGAUAGCUAAuucagagaUUAGCUUAUCAUCUUUCGcuuuua | Reads |
| .....CCCGCGAAAGAUGAUA.....                                    | 8     |
| .....CCCGCGAAAGAUGAUAA.....                                   | 15    |
| .....CCCGCGAAAGAUGAUAG.....                                   | 64    |

|                                         |      |
|-----------------------------------------|------|
| .....CCGCGAAAGAUGAUAAAGC.....           | 65   |
| .....CCGCGAAAGAUGAUAAAGCU.....          | 71   |
| .....CCGCGAAAGAUGAUAAAGCUA.....         | 332  |
| .....CCGCGAAAGAUGAUAAAGCUAA.....        | 1542 |
| .....CCGCGAAAGAUGAUAAAGCUAAU.....       | 487  |
| .....CCGCGAAAGAUGAUAAAGCUAAUU.....      | 214  |
| .....CCGCGAAAGAUGAUAAAGCUAAUUC.....     | 26   |
| .....CCGCGAAAGAUGAUAAAGCUAAUUCA.....    | 5    |
| .....CCGCGAAAGAUGAUAAAGCUAAUUCAA.....   | 2    |
| .....CCGCGAAAGAUGAUAAA.....             | 10   |
| .....CCGCGAAAGAUGAUAAAG.....            | 51   |
| .....CCGCGAAAGAUGAUAAAGC.....           | 56   |
| .....CCGCGAAAGAUGAUAAAGCU.....          | 66   |
| .....CCGCGAAAGAUGAUAAAGCUA.....         | 141  |
| .....CCGCGAAAGAUGAUAAAGCUAA.....        | 529  |
| .....CCGCGAAAGAUGAUAAAGCUAAU.....       | 2059 |
| .....CCGCGAAAGAUGAUAAAGCUAAUU.....      | 354  |
| .....CCGCGAAAGAUGAUAAAGCUAAUUC.....     | 18   |
| .....CCGCGAAAGAUGAUAAAGCUAAUUCA.....    | 15   |
| .....CCGCGAAAGAUGAUAAAGCUAAUUCAA.....   | 2    |
| .....CCGCGAAAGAUGAUAAAGCUAAUUCAAG.....  | 2    |
| .....CGCGAAAGAUGAUAAAG.....             | 28   |
| .....CGCGAAAGAUGAUAAAGC.....            | 21   |
| .....CGCGAAAGAUGAUAAAGCU.....           | 52   |
| .....CGCGAAAGAUGAUAAAGCUA.....          | 123  |
| .....CGCGAAAGAUGAUAAAGCUAA.....         | 271  |
| .....CGCGAAAGAUGAUAAAGCUAAU.....        | 589  |
| .....CGCGAAAGAUGAUAAAGCUAAUU.....       | 1526 |
| .....CGCGAAAGAUGAUAAAGCUAAUUC.....      | 44   |
| .....CGCGAAAGAUGAUAAAGCUAAUUCA.....     | 16   |
| .....CGCGAAAGAUGAUAAAGCUAAUUCAA.....    | 5    |
| .....CGCGAAAGAUGAUAAAGCUAAUUCAAG.....   | 5    |
| .....CGCGAAAGAUGAUAAAGCUAAUUCAAGA.....  | 6    |
| .....GCGAAAGAUGAUAAAGC.....             | 367  |
| .....GCGAAAGAUGAUAAAGCU.....            | 691  |
| .....GCGAAAGAUGAUAAAGCUA.....           | 1275 |
| .....GCGAAAGAUGAUAAAGCUAA.....          | 2143 |
| .....GCGAAAGAUGAUAAAGCUAAU.....         | 636  |
| .....GCGAAAGAUGAUAAAGCUAAUU.....        | 1206 |
| .....GCGAAAGAUGAUAAAGCUAAUUC.....       | 255  |
| .....GCGAAAGAUGAUAAAGCUAAUUCA.....      | 87   |
| .....GCGAAAGAUGAUAAAGCUAAUUCAA.....     | 28   |
| .....GCGAAAGAUGAUAAAGCUAAUUCAAG.....    | 36   |
| .....GCGAAAGAUGAUAAAGCUAAUUCAAGA.....   | 48   |
| .....GCGAAAGAUGAUAAAGCUAAUUCAAGAG.....  | 45   |
| .....GCGAAAGAUGAUAAAGCUAAUUCAAGAGA..... | 36   |
| .....CGAAAGAUGAUAAAGCU.....             | 11   |

|                                      |     |
|--------------------------------------|-----|
| .....CGAAAGAUGAUAAGCUA.....          | 27  |
| .....CGAAAGAUGAUAAGCUAA.....         | 81  |
| .....CGAAAGAUGAUAAGCUAAU.....        | 257 |
| .....CGAAAGAUGAUAAGCUAAUU.....       | 35  |
| .....CGAAAGAUGAUAAGCUAAUUC.....      | 51  |
| .....CGAAAGAUGAUAAGCUAAUUCA.....     | 37  |
| .....CGAAAGAUGAUAAGCUAAUUCAA.....    | 2   |
| .....GAAAGAUGAUAAGCUA.....           | 22  |
| .....GAAAGAUGAUAAGCUAA.....          | 25  |
| .....GAAAGAUGAUAAGCUAAU.....         | 53  |
| .....GAAAGAUGAUAAGCUAAUU.....        | 17  |
| .....GAAAGAUGAUAAGCUAAUUC.....       | 14  |
| .....GAAAGAUGAUAAGCUAAUUCA.....      | 2   |
| .....GAAAGAUGAUAAGCUAAUUCAA.....     | 2   |
| .....GAAAGAUGAUAAGCUAAUUCAAG.....    | 3   |
| .....GAAAGAUGAUAAGCUAAUUCAAGA.....   | 3   |
| .....GAAAGAUGAUAAGCUAAUUCAAGAG.....  | 4   |
| .....GAAAGAUGAUAAGCUAAUUCAAGAGA..... | 7   |
| .....AAAGAUGAUAAGCUAA.....           | 10  |
| .....AAAGAUGAUAAGCUAAU.....          | 36  |
| .....AAAGAUGAUAAGCUAAUU.....         | 20  |
| .....AAAGAUGAUAAGCUAAUUC.....        | 16  |
| .....AAAGAUGAUAAGCUAAUUCA.....       | 2   |
| .....AAAGAUGAUAAGCUAAUUCAAG.....     | 4   |
| .....AAAGAUGAUAAGCUAAUUCAAGA.....    | 2   |
| .....AAAGAUGAUAAGCUAAUUCAAGAG.....   | 7   |
| .....AAAGAUGAUAAGCUAAUUCAAGAGAU..... | 4   |
| .....AAGAUGAUAAGCUAAU.....           | 26  |
| .....AAGAUGAUAAGCUAAUU.....          | 38  |
| .....AAGAUGAUAAGCUAAUUC.....         | 31  |
| .....AAGAUGAUAAGCUAAUUCA.....        | 2   |
| .....AAGAUGAUAAGCUAAUUCAAG.....      | 3   |
| .....AAGAUGAUAAGCUAAUUCAAGA.....     | 5   |
| .....AAGAUGAUAAGCUAAUUCAAGAG.....    | 6   |
| .....AAGAUGAUAAGCUAAUUCAAGAGA.....   | 6   |
| .....AAGAUGAUAAGCUAAUUCAAGAGAU.....  | 6   |
| .....AAGAUGAUAAGCUAAUUCAAGAGAUU..... | 2   |
| .....AGAUGAUAAGCUAAUU.....           | 6   |
| .....AGAUGAUAAGCUAAUUC.....          | 14  |
| .....AGAUGAUAAGCUAAUUCA.....         | 3   |
| .....AGAUGAUAAGCUAAUUCAAGAG.....     | 7   |
| .....AGAUGAUAAGCUAAUUCAAGAGA.....    | 4   |
| .....AGAUGAUAAGCUAAUUCAAGAGAU.....   | 3   |
| .....GAUGAUAAGCUAAUUCAA.....         | 3   |
| .....GAUGAUAAGCUAAUUCAAG.....        | 3   |
| .....GAUGAUAAGCUAAUUCAAGA.....       | 3   |
| .....GAUGAUAAGCUAAUUCAAGAG.....      | 5   |

|                                      |    |
|--------------------------------------|----|
| .....GAUGUAAGCUAAUUCAAGAGA.....      | 3  |
| .....GAUGUAAGCUAAUUCAAGAGAUU.....    | 3  |
| .....AUGUAAGCUAAUUCA.....            | 4  |
| .....AUGUAAGCUAAUUCAAG.....          | 3  |
| .....AUGUAAGCUAAUUCAAGA.....         | 4  |
| .....AUGUAAGCUAAUUCAAGAG.....        | 4  |
| .....AUGUAAGCUAAUUCAAGAGA.....       | 11 |
| .....AUGUAAGCUAAUUCAAGAGAU.....      | 3  |
| .....AUGUAAGCUAAUUCAAGAGAUUAG.....   | 4  |
| .....AUGUAAGCUAAUUCAAGAGAUUAGCU..... | 3  |
| .....UGUAAGCUAAUUCAAGA.....          | 2  |
| .....UGUAAGCUAAUUCAAGAG.....         | 3  |
| .....UGUAAGCUAAUUCAAGAGA.....        | 6  |
| .....UGUAAGCUAAUUCAAGAGAU.....       | 2  |
| .....UGUAAGCUAAUUCAAGAGAUUAGC.....   | 3  |
| .....UGUAAGCUAAUUCAAGAGAUUAGCUU..... | 2  |
| .....GAUAAGCUAAUUCAAGA.....          | 5  |
| .....GAUAAGCUAAUUCAAGAG.....         | 12 |
| .....GAUAAGCUAAUUCAAGAGA.....        | 20 |
| .....GAUAAGCUAAUUCAAGAGAU.....       | 6  |
| .....GAUAAGCUAAUUCAAGAGAUU.....      | 3  |
| .....GAUAAGCUAAUUCAAGAGAUUA.....     | 2  |
| .....GAUAAGCUAAUUCAAGAGAUUAG.....    | 3  |
| .....GAUAAGCUAAUUCAAGAGAUUAGC.....   | 6  |
| .....GAUAAGCUAAUUCAAGAGAUUAGCU.....  | 5  |
| .....GAUAAGCUAAUUCAAGAGAUUAGCUU..... | 7  |
| .....AUAAGCUAAUUCAAGA.....           | 5  |
| .....AUAAGCUAAUUCAAGAG.....          | 4  |
| .....AUAAGCUAAUUCAAGAGA.....         | 5  |
| .....AUAAGCUAAUUCAAGAGAU.....        | 4  |
| .....AUAAGCUAAUUCAAGAGAUU.....       | 6  |
| .....AUAAGCUAAUUCAAGAGAUUAG.....     | 11 |
| .....AUAAGCUAAUUCAAGAGAUUAGC.....    | 14 |
| .....AUAAGCUAAUUCAAGAGAUUAGCU.....   | 9  |
| .....AUAAGCUAAUUCAAGAGAUUAGCUU.....  | 16 |
| .....AUAAGCUAAUUCAAGAGAUUAGCUUA..... | 4  |
| .....UAAGCUAAUUCAAGAGA.....          | 2  |
| .....UAAGCUAAUUCAAGAGAU.....         | 2  |
| .....UAAGCUAAUUCAAGAGAUU.....        | 3  |
| .....UAAGCUAAUUCAAGAGAUUA.....       | 2  |
| .....UAAGCUAAUUCAAGAGAUUAG.....      | 8  |
| .....UAAGCUAAUUCAAGAGAUUAGC.....     | 5  |
| .....UAAGCUAAUUCAAGAGAUUAGCU.....    | 7  |
| .....UAAGCUAAUUCAAGAGAUUAGCUU.....   | 7  |
| .....AAGCUAAUUCAAGAGA.....           | 5  |
| .....AAGCUAAUUCAAGAGAUU.....         | 3  |
| .....AAGCUAAUUCAAGAGAUUA.....        | 3  |

|                                        |     |
|----------------------------------------|-----|
| .....AAGCUAAUUCAAGAGAUUAG.....         | 4   |
| .....AAGCUAAUUCAAGAGAUUAGC.....        | 6   |
| .....AAGCUAAUUCAAGAGAUUAGCU.....       | 3   |
| .....AAGCUAAUUCAAGAGAUUAGCUUUAU.....   | 4   |
| .....AAGCUAAUUCAAGAGAUUAGCUUAUC.....   | 2   |
| .....AGCUAAUUCAAGAGAU.....             | 3   |
| .....GCUAAUUCAAGAGAUU.....             | 3   |
| .....GCUAAUUCAAGAGAUUAG.....           | 4   |
| .....CUAAUUCAAGAGAUUAG.....            | 4   |
| .....CUAAUUCAAGAGAUUAGC.....           | 15  |
| .....CUAAUUCAAGAGAUUAGCU.....          | 15  |
| .....CUAAUUCAAGAGAUUAGCUUA.....        | 2   |
| .....CUAAUUCAAGAGAUUAGCUUUAU.....      | 5   |
| .....CUAAUUCAAGAGAUUAGCUUAUC.....      | 4   |
| .....UAAUUCAAGAGAUUAG.....             | 6   |
| .....UAAUUCAAGAGAUUAGC.....            | 25  |
| .....UAAUUCAAGAGAUUAGCU.....           | 17  |
| .....UAAUUCAAGAGAUUAGCUU.....          | 8   |
| .....UAAUUCAAGAGAUUAGCUUA.....         | 5   |
| .....UAAUUCAAGAGAUUAGCUUUAU.....       | 3   |
| .....UAAUUCAAGAGAUUAGCUUAUC.....       | 3   |
| .....AAUUCAAGAGAUUAGC.....             | 20  |
| .....AAUUCAAGAGAUUAGCU.....            | 13  |
| .....AAUUCAAGAGAUUAGCUU.....           | 16  |
| .....AAUUCAAGAGAUUAGCUUUAU.....        | 13  |
| .....AAUUCAAGAGAUUAGCUUAUC.....        | 11  |
| .....AAUUCAAGAGAUUAGCUUAUCAU.....      | 9   |
| .....AAUUCAAGAGAUUAGCUUAUCAUC.....     | 7   |
| .....AAUUCAAGAGAUUAGCUUAUCAUCU.....    | 2   |
| .....AAUUCAAGAGAUUAGCUUAUCAUCUU.....   | 3   |
| .....AAUUCAAGAGAUUAGCUUAUCAUCUUU.....  | 14  |
| .....AAUUCAAGAGAUUAGCUUAUCAUCUUUC..... | 2   |
| .....AUUCAAGAGAUUAGCU.....             | 33  |
| .....AUUCAAGAGAUUAGCUU.....            | 39  |
| .....AUUCAAGAGAUUAGCUUA.....           | 21  |
| .....AUUCAAGAGAUUAGCUUUAU.....         | 69  |
| .....AUUCAAGAGAUUAGCUUAUC.....         | 38  |
| .....AUUCAAGAGAUUAGCUUAUCA.....        | 7   |
| .....AUUCAAGAGAUUAGCUUAUCAU.....       | 32  |
| .....AUUCAAGAGAUUAGCUUAUCAUC.....      | 25  |
| .....AUUCAAGAGAUUAGCUUAUCAUCU.....     | 40  |
| .....AUUCAAGAGAUUAGCUUAUCAUCUU.....    | 51  |
| .....AUUCAAGAGAUUAGCUUAUCAUCUUU.....   | 178 |
| .....AUUCAAGAGAUUAGCUUAUCAUCUUUC.....  | 62  |
| .....AUUCAAGAGAUUAGCUUAUCAUCUUUCG..... | 9   |
| .....UUCAAGAGAUUAGCUU.....             | 7   |
| .....UUCAAGAGAUUAGCUUA.....            | 9   |

|                                        |    |
|----------------------------------------|----|
| .....UUCAAGAGAUUAGCUUAAU.....          | 16 |
| .....UUCAAGAGAUUAGCUUAUC.....          | 16 |
| .....UUCAAGAGAUUAGCUUAUCA.....         | 6  |
| .....UUCAAGAGAUUAGCUUAUCAU.....        | 19 |
| .....UUCAAGAGAUUAGCUUAUCAUC.....       | 15 |
| .....UUCAAGAGAUUAGCUUAUCAUCU.....      | 21 |
| .....UUCAAGAGAUUAGCUUAUCAUCUU.....     | 33 |
| .....UUCAAGAGAUUAGCUUAUCAUCUUU.....    | 54 |
| .....UUCAAGAGAUUAGCUUAUCAUCUUUC.....   | 30 |
| .....UUCAAGAGAUUAGCUUAUCAUCUUUCG.....  | 10 |
| .....UUCAAGAGAUUAGCUUAUCAUCUUUCGC..... | 3  |
| .....UCAAGAGAUUAGCUUA.....             | 8  |
| .....UCAAGAGAUUAGCUUAAU.....           | 16 |
| .....UCAAGAGAUUAGCUUAUC.....           | 18 |
| .....UCAAGAGAUUAGCUUAUCA.....          | 5  |
| .....UCAAGAGAUUAGCUUAUCAU.....         | 21 |
| .....UCAAGAGAUUAGCUUAUCAUC.....        | 14 |
| .....UCAAGAGAUUAGCUUAUCAUCU.....       | 18 |
| .....UCAAGAGAUUAGCUUAUCAUCUU.....      | 25 |
| .....UCAAGAGAUUAGCUUAUCAUCUUU.....     | 69 |
| .....UCAAGAGAUUAGCUUAUCAUCUUUC.....    | 39 |
| .....UCAAGAGAUUAGCUUAUCAUCUUUCG.....   | 5  |
| .....UCAAGAGAUUAGCUUAUCAUCUUUCGC.....  | 6  |
| .....UCAAGAGAUUAGCUUAUCAUCUUUCGCU..... | 5  |
| .....CAAGAGAUUAGCUUAAU.....            | 3  |
| .....CAAGAGAUUAGCUUAUC.....            | 7  |
| .....CAAGAGAUUAGCUUAUCA.....           | 2  |
| .....CAAGAGAUUAGCUUAUCAU.....          | 9  |
| .....CAAGAGAUUAGCUUAUCAUCU.....        | 16 |
| .....CAAGAGAUUAGCUUAUCAUCUU.....       | 13 |
| .....CAAGAGAUUAGCUUAUCAUCUUU.....      | 15 |
| .....CAAGAGAUUAGCUUAUCAUCUUUC.....     | 10 |
| .....CAAGAGAUUAGCUUAUCAUCUUUCG.....    | 5  |
| .....CAAGAGAUUAGCUUAUCAUCUUUCGC.....   | 5  |
| .....CAAGAGAUUAGCUUAUCAUCUUUCGCU.....  | 2  |
| .....CAAGAGAUUAGCUUAUCAUCUUUCGCUU..... | 12 |
| .....AAGAGAUUAGCUUAAUC.....            | 8  |
| .....AAGAGAUUAGCUUAUCA.....            | 32 |
| .....AAGAGAUUAGCUUAUCAU.....           | 71 |
| .....AAGAGAUUAGCUUAUCAUCU.....         | 4  |
| .....AAGAGAUUAGCUUAUCAUCUU.....        | 4  |
| .....AAGAGAUUAGCUUAUCAUCUUU.....       | 13 |
| .....AAGAGAUUAGCUUAUCAUCUUUC.....      | 8  |
| .....AAGAGAUUAGCUUAUCAUCUUUCG.....     | 2  |
| .....AAGAGAUUAGCUUAUCAUCUUUCGC.....    | 4  |
| .....AAGAGAUUAGCUUAUCAUCUUUCGCU.....   | 2  |
| .....AAGAGAUUAGCUUAUCAUCUUUCGCUU.....  | 22 |

|                                      |     |
|--------------------------------------|-----|
| .....AAGAGAUUAGCUUAUCAUCUUUCGCUUU... | 7   |
| .....AGAGAUUAGCUUAUCA.....           | 19  |
| .....AGAGAUUAGCUUAUCAU.....          | 219 |
| .....AGAGAUUAGCUUAUCAUC.....         | 8   |
| .....AGAGAUUAGCUUAUCAUCU.....        | 4   |
| .....AGAGAUUAGCUUAUCAUCUU.....       | 3   |
| .....AGAGAUUAGCUUAUCAUCUUU.....      | 10  |
| .....AGAGAUUAGCUUAUCAUCUUUC.....     | 6   |
| .....AGAGAUUAGCUUAUCAUCUUUCG.....    | 3   |
| .....AGAGAUUAGCUUAUCAUCUUUCGC.....   | 5   |
| .....AGAGAUUAGCUUAUCAUCUUUCGCU.....  | 9   |
| .....AGAGAUUAGCUUAUCAUCUUUCGCUU..... | 11  |
| .....AGAGAUUAGCUUAUCAUCUUUCGCUUU...  | 13  |
| .....GAGAUUAGCUUAUCAU.....           | 37  |
| .....GAGAUUAGCUUAUCAUC.....          | 20  |
| .....GAGAUUAGCUUAUCAUCU.....         | 8   |
| .....GAGAUUAGCUUAUCAUCUU.....        | 11  |
| .....GAGAUUAGCUUAUCAUCUUU.....       | 17  |
| .....GAGAUUAGCUUAUCAUCUUUC.....      | 4   |
| .....GAGAUUAGCUUAUCAUCUUUCG.....     | 2   |
| .....GAGAUUAGCUUAUCAUCUUUCGCU.....   | 5   |
| .....GAGAUUAGCUUAUCAUCUUUCGCUU.....  | 23  |
| .....GAGAUUAGCUUAUCAUCUUUCGCUUU...   | 39  |
| .....GAGAUUAGCUUAUCAUCUUUCGCUUUU..   | 5   |
| .....AGAUUAGCUUAUCAUC.....           | 18  |
| .....AGAUUAGCUUAUCAUCU.....          | 20  |
| .....AGAUUAGCUUAUCAUCUU.....         | 8   |
| .....AGAUUAGCUUAUCAUCUUU.....        | 17  |
| .....AGAUUAGCUUAUCAUCUUUC.....       | 11  |
| .....AGAUUAGCUUAUCAUCUUUCG.....      | 5   |
| .....AGAUUAGCUUAUCAUCUUUCGC.....     | 8   |
| .....AGAUUAGCUUAUCAUCUUUCGCU.....    | 5   |
| .....AGAUUAGCUUAUCAUCUUUCGCUU.....   | 25  |
| .....AGAUUAGCUUAUCAUCUUUCGCUUU...    | 53  |
| .....AGAUUAGCUUAUCAUCUUUCGCUUUU..    | 6   |
| .....GAUUAGCUUAUCAUCU.....           | 3   |
| .....GAUUAGCUUAUCAUCUU.....          | 12  |
| .....GAUUAGCUUAUCAUCUUU.....         | 22  |
| .....GAUUAGCUUAUCAUCUUUC.....        | 19  |
| .....GAUUAGCUUAUCAUCUUUCG.....       | 5   |
| .....GAUUAGCUUAUCAUCUUUCGC.....      | 20  |
| .....GAUUAGCUUAUCAUCUUUCGCU.....     | 11  |
| .....GAUUAGCUUAUCAUCUUUCGCUU.....    | 95  |
| .....GAUUAGCUUAUCAUCUUUCGCUUU...     | 254 |
| .....GAUUAGCUUAUCAUCUUUCGCUUUU..     | 13  |
| .....AUUAGCUUAUCAUCUU.....           | 13  |
| .....AUUAGCUUAUCAUCUUU.....          | 52  |

|                                  |       |
|----------------------------------|-------|
| .....AUUAGCUUAUCAUCUUUC.....     | 29    |
| .....AUUAGCUUAUCAUCUUUCG.....    | 15    |
| .....AUUAGCUUAUCAUCUUUCGC.....   | 7     |
| .....AUUAGCUUAUCAUCUUUCGCU.....  | 14    |
| .....AUUAGCUUAUCAUCUUUCGCUU..... | 87    |
| .....AUUAGCUUAUCAUCUUUCGCUUU..   | 494   |
| .....AUUAGCUUAUCAUCUUUCGCUUUU..  | 16    |
| .....UUAGCUUAUCAUCUUU.....       | 32    |
| .....UUAGCUUAUCAUCUUUC.....      | 43    |
| .....UUAGCUUAUCAUCUUUCG.....     | 68    |
| .....UUAGCUUAUCAUCUUUCGC.....    | 275   |
| .....UUAGCUUAUCAUCUUUCGCU.....   | 472   |
| .....UUAGCUUAUCAUCUUUCGCUU.....  | 2840  |
| .....UUAGCUUAUCAUCUUUCGCUUU..    | 19381 |
| .....UUAGCUUAUCAUCUUUCGCUUUU..   | 221   |
| .....UUAGCUUAUCAUCUUUCGCUUUUU..  | 4     |
| .....UAGCUUAUCAUCUUUC.....       | 13    |
| .....UAGCUUAUCAUCUUUCG.....      | 8     |
| .....UAGCUUAUCAUCUUUCGC.....     | 36    |
| .....UAGCUUAUCAUCUUUCGCU.....    | 153   |
| .....UAGCUUAUCAUCUUUCGCUU.....   | 174   |
| .....UAGCUUAUCAUCUUUCGCUUU..     | 1401  |
| .....UAGCUUAUCAUCUUUCGCUUUU..    | 152   |
| .....UAGCUUAUCAUCUUUCGCUUUUU..   | 5     |
| .....AGCUUAUCAUCUUUCG.....       | 3     |
| .....AGCUUAUCAUCUUUCGC.....      | 7     |
| .....AGCUUAUCAUCUUUCGCU.....     | 19    |
| .....AGCUUAUCAUCUUUCGCUU.....    | 26    |
| .....AGCUUAUCAUCUUUCGCUUU..      | 97    |
| .....AGCUUAUCAUCUUUCGCUUUU..     | 28    |
| .....GCUUAUCAUCUUUCGCU.....      | 9     |
| .....GCUUAUCAUCUUUCGCUU.....     | 17    |
| .....GCUUAUCAUCUUUCGCUUU..       | 46    |
| .....GCUUAUCAUCUUUCGCUUUU..      | 4     |
| .....CUUAUCAUCUUUCGCU.....       | 10    |
| .....CUUAUCAUCUUUCGCUU.....      | 38    |
| .....CUUAUCAUCUUUCGCUUU..        | 94    |
| .....CUUAUCAUCUUUCGCUUUU..       | 8     |
| .....CUUAUCAUCUUUCGCUUUUU..      | 2     |
| .....UUAUCAUCUUUCGCUU.....       | 56    |
| .....UUAUCAUCUUUCGCUUU..         | 146   |
| .....UUAUCAUCUUUCGCUUUU..        | 14    |
| .....UAUCAUCUUUCGCUUU..          | 62    |
| .....UAUCAUCUUUCGCUUUU..         | 3     |
| .....AUCAUCUUUCGCUUUU..          | 4     |

#pSUPER GFP with original H1 promoter



|                                                                    | Reads |
|--------------------------------------------------------------------|-------|
| ccacucuuucccGGCACAAGCUGGAGUACAAuuccaagagaUUGUACUCCAGCUUGUGCCuuuuua |       |
| .....CCCAGCUGGA.....                                               | 2     |
| .....CCCAGGAG.....                                                 | 2     |
| .....CCCAGGAGU.....                                                | 41    |
| .....CCCAGGAGUA.....                                               | 110   |
| .....CCCAGGAGUAC.....                                              | 211   |
| .....CCCAGGAGUACA.....                                             | 811   |
| .....CCCAGGAGUACAA.....                                            | 789   |
| .....CCCAGGAGUACAAU.....                                           | 292   |
| .....CCCAGGAGUACAAUU.....                                          | 38    |
| .....CCCAGGAGUACAAUUC.....                                         | 3     |
| .....CCAGGAG.....                                                  | 124   |
| .....CCAGGAGU.....                                                 | 68    |
| .....CCAGGAGUA.....                                                | 115   |
| .....CCAGGAGUAC.....                                               | 189   |
| .....CCAGGAGUACA.....                                              | 531   |
| .....CCAGGAGUACAA.....                                             | 1412  |
| .....CCAGGAGUACAAU.....                                            | 3025  |
| .....CCAGGAGUACAAUU.....                                           | 125   |
| .....CCAGGAGUACAAUUC.....                                          | 3     |
| .....CGGAGU.....                                                   | 46    |
| .....CGGAGUA.....                                                  | 115   |
| .....CGGAGUAC.....                                                 | 268   |
| .....CGGAGUACA.....                                                | 394   |
| .....CGGAGUACAA.....                                               | 624   |
| .....CGGAGUACAAU.....                                              | 1285  |
| .....CGGAGUACAAUU.....                                             | 2266  |
| .....CGGAGUACAAUUC.....                                            | 101   |
| .....CGGAGUACAAUUCA.....                                           | 36    |
| .....CGGAGUACAAUUCAA.....                                          | 8     |
| .....CGGAGUACAAUUCAAG.....                                         | 10    |
| .....CGGAGUACAAUUCAAGA.....                                        | 7     |
| .....CGGAGUACAAUUCAAGAG.....                                       | 2     |
| .....GGCAGU.....                                                   | 505   |
| .....GGCAGUAC.....                                                 | 1618  |
| .....GGCAGUACA.....                                                | 1514  |
| .....GGCAGUACAA.....                                               | 1959  |
| .....GGCAGUACAAU.....                                              | 725   |
| .....GGCAGUACAAUU.....                                             | 685   |
| .....GGCAGUACAAUUC.....                                            | 72    |
| .....GGCAGUACAAUUCA.....                                           | 29    |
| .....GGCAGUACAAUUCAA.....                                          | 23    |
| .....GGCAGUACAAUUCAAG.....                                         | 54    |
| .....GGCAGUACAAUUCAAGA.....                                        | 107   |
| .....GGCAGUACAAUUCAAGAG.....                                       | 37    |
| .....GGCAGUACAAUUCAAGAGA.....                                      | 13    |
| .....GCAGUAC.....                                                  | 18    |

|                                       |    |
|---------------------------------------|----|
| .....GCACAAGCUGGAGUACA.....           | 14 |
| .....GCACAAGCUGGAGUACAA.....          | 22 |
| .....GCACAAGCUGGAGUACAAU.....         | 18 |
| .....GCACAAGCUGGAGUACAAUU.....        | 7  |
| .....GCACAAGCUGGAGUACAAUUC.....       | 2  |
| .....GCACAAGCUGGAGUACAAUUCAAGAGA..... | 2  |
| .....CACAAGCUGGAGUACA.....            | 47 |
| .....CACAAGCUGGAGUACAA.....           | 31 |
| .....CACAAGCUGGAGUACAAU.....          | 45 |
| .....CACAAGCUGGAGUACAAUU.....         | 24 |
| .....CACAAGCUGGAGUACAAUUC.....        | 3  |
| .....CACAAGCUGGAGUACAAUUCAAG.....     | 2  |
| .....CACAAGCUGGAGUACAAUUCAAGA.....    | 4  |
| .....CACAAGCUGGAGUACAAUUCAAGAG.....   | 7  |
| .....CACAAGCUGGAGUACAAUUCAAGAGA.....  | 7  |
| .....CACAAGCUGGAGUACAAUUCAAGAGAU..... | 7  |
| .....ACAAGCUGGAGUACAA.....            | 15 |
| .....ACAAGCUGGAGUACAAU.....           | 16 |
| .....ACAAGCUGGAGUACAAUU.....          | 16 |
| .....ACAAGCUGGAGUACAAUUC.....         | 11 |
| .....ACAAGCUGGAGUACAAUUCA.....        | 6  |
| .....ACAAGCUGGAGUACAAUUCAA.....       | 2  |
| .....ACAAGCUGGAGUACAAUUCAAG.....      | 3  |
| .....ACAAGCUGGAGUACAAUUCAAGA.....     | 2  |
| .....ACAAGCUGGAGUACAAUUCAAGAG.....    | 8  |
| .....ACAAGCUGGAGUACAAUUCAAGAGA.....   | 9  |
| .....ACAAGCUGGAGUACAAUUCAAGAGAU.....  | 20 |
| .....CAAGCUGGAGUACAAU.....            | 12 |
| .....CAAGCUGGAGUACAAUU.....           | 12 |
| .....CAAGCUGGAGUACAAUUC.....          | 33 |
| .....CAAGCUGGAGUACAAUUCA.....         | 10 |
| .....CAAGCUGGAGUACAAUUCAAG.....       | 4  |
| .....CAAGCUGGAGUACAAUUCAAGA.....      | 4  |
| .....CAAGCUGGAGUACAAUUCAAGAG.....     | 4  |
| .....CAAGCUGGAGUACAAUUCAAGAGA.....    | 7  |
| .....CAAGCUGGAGUACAAUUCAAGAGAU.....   | 12 |
| .....AAGCUGGAGUACAAUU.....            | 10 |
| .....AAGCUGGAGUACAAUUC.....           | 12 |
| .....AAGCUGGAGUACAAUUCAAGA.....       | 4  |
| .....AAGCUGGAGUACAAUUCAAGAG.....      | 4  |
| .....AAGCUGGAGUACAAUUCAAGAGA.....     | 3  |
| .....AAGCUGGAGUACAAUUCAAGAGAU.....    | 9  |
| .....AAGCUGGAGUACAAUUCAAGAGAUU.....   | 3  |
| .....AGCUGGAGUACAAUUC.....            | 7  |
| .....GCUGGAGUACAAUUCAAG.....          | 2  |
| .....GCUGGAGUACAAUUCAAGAGA.....       | 2  |
| .....GCUGGAGUACAAUUCAAGAGAU.....      | 3  |

|                                       |    |
|---------------------------------------|----|
| .....CUGGAGUACAAUUCAA.....            | 2  |
| .....CUGGAGUACAAUUCAAG.....           | 2  |
| .....CUGGAGUACAAUUCAAGA.....          | 8  |
| .....CUGGAGUACAAUUCAAGAG.....         | 2  |
| .....CUGGAGUACAAUUCAAGAGA.....        | 6  |
| .....CUGGAGUACAAUUCAAGAGAU.....       | 7  |
| .....CUGGAGUACAAUUCAAGAGAUUG.....     | 2  |
| .....CUGGAGUACAAUUCAAGAGAUUGUA.....   | 2  |
| .....CUGGAGUACAAUUCAAGAGAUUGUAC.....  | 2  |
| .....CUGGAGUACAAUUCAAGAGAUUGUACU..... | 4  |
| .....UGGAGUACAAUUCAAG.....            | 5  |
| .....UGGAGUACAAUUCAAGA.....           | 3  |
| .....UGGAGUACAAUUCAAGAG.....          | 4  |
| .....UGGAGUACAAUUCAAGAGA.....         | 17 |
| .....UGGAGUACAAUUCAAGAGAU.....        | 3  |
| .....UGGAGUACAAUUCAAGAGAUU.....       | 3  |
| .....UGGAGUACAAUUCAAGAGAUUG.....      | 5  |
| .....UGGAGUACAAUUCAAGAGAUUGU.....     | 2  |
| .....UGGAGUACAAUUCAAGAGAUUGUA.....    | 4  |
| .....UGGAGUACAAUUCAAGAGAUUGUAC.....   | 8  |
| .....UGGAGUACAAUUCAAGAGAUUGUACU.....  | 4  |
| .....GGAGUACAAUUCAAGA.....            | 5  |
| .....GGAGUACAAUUCAAGAG.....           | 5  |
| .....GGAGUACAAUUCAAGAGA.....          | 3  |
| .....GGAGUACAAUUCAAGAGAU.....         | 4  |
| .....GGAGUACAAUUCAAGAGAUUG.....       | 4  |
| .....GGAGUACAAUUCAAGAGAUUGUA.....     | 6  |
| .....GGAGUACAAUUCAAGAGAUUGUAC.....    | 5  |
| .....GGAGUACAAUUCAAGAGAUUGUACU.....   | 3  |
| .....GAGUACAAUUCAAGAG.....            | 3  |
| .....GAGUACAAUUCAAGAGA.....           | 2  |
| .....GAGUACAAUUCAAGAGAU.....          | 17 |
| .....GAGUACAAUUCAAGAGAUU.....         | 7  |
| .....GAGUACAAUUCAAGAGAUUG.....        | 17 |
| .....GAGUACAAUUCAAGAGAUUGU.....       | 6  |
| .....GAGUACAAUUCAAGAGAUUGUA.....      | 37 |
| .....GAGUACAAUUCAAGAGAUUGUAC.....     | 16 |
| .....GAGUACAAUUCAAGAGAUUGUACU.....    | 27 |
| .....AGUACAAUUCAAGAGAU.....           | 11 |
| .....AGUACAAUUCAAGAGAUUG.....         | 14 |
| .....AGUACAAUUCAAGAGAUUGU.....        | 4  |
| .....AGUACAAUUCAAGAGAUUGUA.....       | 4  |
| .....AGUACAAUUCAAGAGAUUGUAC.....      | 9  |
| .....AGUACAAUUCAAGAGAUUGUACUCC.....   | 2  |
| .....GUACAAUUCAAGAGAU.....            | 9  |
| .....GUACAAUUCAAGAGAUU.....           | 5  |
| .....GUACAAUUCAAGAGAUUG.....          | 6  |

|                                        |     |
|----------------------------------------|-----|
| .....GUACAAUUCAAGAGAUUGU.....          | 3   |
| .....UACAAUUCAAGAGAAU.....             | 21  |
| .....UACAAUUCAAGAGAUUG.....            | 9   |
| .....UACAAUUCAAGAGAUUGUA.....          | 3   |
| .....UACAAUUCAAGAGAUUGUACU.....        | 6   |
| .....UACAAUUCAAGAGAUUGUACUC.....       | 4   |
| .....ACAAUUCAAGAGAUUG.....             | 4   |
| .....ACAAUUCAAGAGAUUGU.....            | 2   |
| .....ACAAUUCAAGAGAUUGUA.....           | 2   |
| .....ACAAUUCAAGAGAUUGUAC.....          | 6   |
| .....ACAAUUCAAGAGAUUGUACU.....         | 2   |
| .....CAAUUCAAGAGAUUGU.....             | 4   |
| .....CAAUUCAAGAGAUUGUA.....            | 27  |
| .....CAAUUCAAGAGAUUGUAC.....           | 40  |
| .....CAAUUCAAGAGAUUGUACU.....          | 17  |
| .....CAAUUCAAGAGAUUGUACUC.....         | 21  |
| .....CAAUUCAAGAGAUUGUACUCCAG.....      | 9   |
| .....CAAUUCAAGAGAUUGUACUCCAGCUU.....   | 6   |
| .....CAAUUCAAGAGAUUGUACUCCAGCUUG.....  | 4   |
| .....AAUUCAAGAGAUUGUA.....             | 110 |
| .....AAUUCAAGAGAUUGUAC.....            | 160 |
| .....AAUUCAAGAGAUUGUACU.....           | 137 |
| .....AAUUCAAGAGAUUGUACUC.....          | 46  |
| .....AAUUCAAGAGAUUGUACUCC.....         | 10  |
| .....AAUUCAAGAGAUUGUACUCCA.....        | 3   |
| .....AAUUCAAGAGAUUGUACUCCAG.....       | 14  |
| .....AAUUCAAGAGAUUGUACUCCAGC.....      | 3   |
| .....AAUUCAAGAGAUUGUACUCCAGCU.....     | 11  |
| .....AAUUCAAGAGAUUGUACUCCAGCUU.....    | 22  |
| .....AAUUCAAGAGAUUGUACUCCAGCUUG.....   | 38  |
| .....AAUUCAAGAGAUUGUACUCCAGCUUGU.....  | 10  |
| .....AAUUCAAGAGAUUGUACUCCAGCUUGUG..... | 28  |
| .....AUUCAAGAGAUUGUAC.....             | 33  |
| .....AUUCAAGAGAUUGUACU.....            | 36  |
| .....AUUCAAGAGAUUGUACUC.....           | 17  |
| .....AUUCAAGAGAUUGUACUCC.....          | 9   |
| .....AUUCAAGAGAUUGUACUCCA.....         | 8   |
| .....AUUCAAGAGAUUGUACUCCAG.....        | 19  |
| .....AUUCAAGAGAUUGUACUCCAGC.....       | 4   |
| .....AUUCAAGAGAUUGUACUCCAGCU.....      | 16  |
| .....AUUCAAGAGAUUGUACUCCAGCUU.....     | 62  |
| .....AUUCAAGAGAUUGUACUCCAGCUUG.....    | 95  |
| .....AUUCAAGAGAUUGUACUCCAGCUUGU.....   | 53  |
| .....AUUCAAGAGAUUGUACUCCAGCUUGUG.....  | 151 |
| .....AUUCAAGAGAUUGUACUCCAGCUUGUGC..... | 9   |
| .....UUCAAGAGAUUGUACU.....             | 17  |
| .....UUCAAGAGAUUGUACUC.....            | 12  |

|                                        |     |
|----------------------------------------|-----|
| .....UUCAAGAGAUUGUACUCC.....           | 4   |
| .....UUCAAGAGAUUGUACUCCA.....          | 13  |
| .....UUCAAGAGAUUGUACUCCAG.....         | 33  |
| .....UUCAAGAGAUUGUACUCCAGC.....        | 11  |
| .....UUCAAGAGAUUGUACUCCAGCU.....       | 24  |
| .....UUCAAGAGAUUGUACUCCAGCUU.....      | 101 |
| .....UUCAAGAGAUUGUACUCCAGCUUG.....     | 89  |
| .....UUCAAGAGAUUGUACUCCAGCUUGU.....    | 73  |
| .....UUCAAGAGAUUGUACUCCAGCUUGUG.....   | 123 |
| .....UUCAAGAGAUUGUACUCCAGCUUGUGC.....  | 20  |
| .....UUCAAGAGAUUGUACUCCAGCUUGUGCC..... | 6   |
| .....UCAAGAGAUUGUACUC.....             | 22  |
| .....UCAAGAGAUUGUACUCC.....            | 10  |
| .....UCAAGAGAUUGUACUCCA.....           | 14  |
| .....UCAAGAGAUUGUACUCCAG.....          | 24  |
| .....UCAAGAGAUUGUACUCCAGC.....         | 10  |
| .....UCAAGAGAUUGUACUCCAGCU.....        | 20  |
| .....UCAAGAGAUUGUACUCCAGCUU.....       | 75  |
| .....UCAAGAGAUUGUACUCCAGCUUG.....      | 74  |
| .....UCAAGAGAUUGUACUCCAGCUUGU.....     | 65  |
| .....UCAAGAGAUUGUACUCCAGCUUGUG.....    | 181 |
| .....UCAAGAGAUUGUACUCCAGCUUGUGC.....   | 35  |
| .....UCAAGAGAUUGUACUCCAGCUUGUGCC.....  | 8   |
| .....UCAAGAGAUUGUACUCCAGCUUGUGCCU..... | 9   |
| .....CAAGAGAUUGUACUCC.....             | 2   |
| .....CAAGAGAUUGUACUCCA.....            | 4   |
| .....CAAGAGAUUGUACUCCAG.....           | 11  |
| .....CAAGAGAUUGUACUCCAGC.....          | 5   |
| .....CAAGAGAUUGUACUCCAGCU.....         | 7   |
| .....CAAGAGAUUGUACUCCAGCUU.....        | 20  |
| .....CAAGAGAUUGUACUCCAGCUUG.....       | 20  |
| .....CAAGAGAUUGUACUCCAGCUUGU.....      | 15  |
| .....CAAGAGAUUGUACUCCAGCUUGUG.....     | 34  |
| .....CAAGAGAUUGUACUCCAGCUUGUGC.....    | 12  |
| .....CAAGAGAUUGUACUCCAGCUUGUGCC.....   | 4   |
| .....CAAGAGAUUGUACUCCAGCUUGUGCCU.....  | 9   |
| .....CAAGAGAUUGUACUCCAGCUUGUGCCUU..... | 19  |
| .....AAGAGAUUGUACUCCA.....             | 8   |
| .....AAGAGAUUGUACUCCAG.....            | 31  |
| .....AAGAGAUUGUACUCCAGC.....           | 3   |
| .....AAGAGAUUGUACUCCAGCU.....          | 11  |
| .....AAGAGAUUGUACUCCAGCUU.....         | 21  |
| .....AAGAGAUUGUACUCCAGCUUG.....        | 17  |
| .....AAGAGAUUGUACUCCAGCUUGU.....       | 9   |
| .....AAGAGAUUGUACUCCAGCUUGUG.....      | 34  |
| .....AAGAGAUUGUACUCCAGCUUGUGC.....     | 8   |
| .....AAGAGAUUGUACUCCAGCUUGUGCC.....    | 13  |

|                                        |     |
|----------------------------------------|-----|
| .....AAGAGAUUGUACUCCAGCUUGUGCCU.....   | 13  |
| .....AAGAGAUUGUACUCCAGCUUGUGCCUU.....  | 64  |
| .....AAGAGAUUGUACUCCAGCUUGUGCCUUU... . | 17  |
| .....AGAGAUUGUACUCCAG.....             | 20  |
| .....AGAGAUUGUACUCCAGC.....            | 20  |
| .....AGAGAUUGUACUCCAGCU.....           | 3   |
| .....AGAGAUUGUACUCCAGCUU.....          | 10  |
| .....AGAGAUUGUACUCCAGCUUG.....         | 8   |
| .....AGAGAUUGUACUCCAGCUUGU.....        | 6   |
| .....AGAGAUUGUACUCCAGCUUGUG.....       | 25  |
| .....AGAGAUUGUACUCCAGCUUGUGC.....      | 15  |
| .....AGAGAUUGUACUCCAGCUUGUGCC.....     | 87  |
| .....AGAGAUUGUACUCCAGCUUGUGCCU.....    | 125 |
| .....AGAGAUUGUACUCCAGCUUGUGCCUU.....   | 52  |
| .....AGAGAUUGUACUCCAGCUUGUGCCUUU... .  | 22  |
| .....GAGAUUGUACUCCAGC.....             | 4   |
| .....GAGAUUGUACUCCAGCU.....            | 5   |
| .....GAGAUUGUACUCCAGCUU.....           | 10  |
| .....GAGAUUGUACUCCAGCUUG.....          | 18  |
| .....GAGAUUGUACUCCAGCUUGU.....         | 10  |
| .....GAGAUUGUACUCCAGCUUGUG.....        | 23  |
| .....GAGAUUGUACUCCAGCUUGUGC.....       | 14  |
| .....GAGAUUGUACUCCAGCUUGUGCC.....      | 26  |
| .....GAGAUUGUACUCCAGCUUGUGCCU.....     | 27  |
| .....GAGAUUGUACUCCAGCUUGUGCCUU.....    | 109 |
| .....GAGAUUGUACUCCAGCUUGUGCCUUU... .   | 78  |
| .....GAGAUUGUACUCCAGCUUGUGCCUUUU... .  | 6   |
| .....AGAUUGUACUCCAGCU.....             | 5   |
| .....AGAUUGUACUCCAGCUU.....            | 12  |
| .....AGAUUGUACUCCAGCUUG.....           | 20  |
| .....AGAUUGUACUCCAGCUUGU.....          | 9   |
| .....AGAUUGUACUCCAGCUUGUG.....         | 32  |
| .....AGAUUGUACUCCAGCUUGUGC.....        | 10  |
| .....AGAUUGUACUCCAGCUUGUGCC.....       | 27  |
| .....AGAUUGUACUCCAGCUUGUGCCU.....      | 44  |
| .....AGAUUGUACUCCAGCUUGUGCCUU.....     | 165 |
| .....AGAUUGUACUCCAGCUUGUGCCUUU... .    | 86  |
| .....AGAUUGUACUCCAGCUUGUGCCUUUU... .   | 9   |
| .....AGAUUGUACUCCAGCUUGUGCCUUUUU... .  | 2   |
| .....GAUUGUACUCCAGCUU.....             | 13  |
| .....GAUUGUACUCCAGCUUG.....            | 32  |
| .....GAUUGUACUCCAGCUUGU.....           | 27  |
| .....GAUUGUACUCCAGCUUGUG.....          | 109 |
| .....GAUUGUACUCCAGCUUGUGC.....         | 23  |
| .....GAUUGUACUCCAGCUUGUGCC.....        | 48  |
| .....GAUUGUACUCCAGCUUGUGCCU.....       | 78  |
| .....GAUUGUACUCCAGCUUGUGCCUU.....      | 346 |

|                                  |       |
|----------------------------------|-------|
| .....GAUUGUACUCCAGCUUGUGCCUUU... | 419   |
| .....GAUUGUACUCCAGCUUGUGCCUUUU.. | 14    |
| .....GAUUGUACUCCAGCUUGUGCCUUUUU. | 5     |
| .....AUUGUACUCCAGCUUG.....       | 26    |
| .....AUUGUACUCCAGCUUGU.....      | 14    |
| .....AUUGUACUCCAGCUUGUG.....     | 136   |
| .....AUUGUACUCCAGCUUGUGC.....    | 30    |
| .....AUUGUACUCCAGCUUGUGCC.....   | 39    |
| .....AUUGUACUCCAGCUUGUGCCU.....  | 59    |
| .....AUUGUACUCCAGCUUGUGCCUU....  | 296   |
| .....AUUGUACUCCAGCUUGUGCCUUU...  | 275   |
| .....AUUGUACUCCAGCUUGUGCCUUUU..  | 10    |
| .....AUUGUACUCCAGCUUGUGCCUUUUU.  | 2     |
| .....UUGUACUCCAGCUUGU.....       | 50    |
| .....UUGUACUCCAGCUUGUG.....      | 162   |
| .....UUGUACUCCAGCUUGUGC.....     | 102   |
| .....UUGUACUCCAGCUUGUGCC.....    | 191   |
| .....UUGUACUCCAGCUUGUGCCU.....   | 579   |
| .....UUGUACUCCAGCUUGUGCCUU....   | 4043  |
| .....UUGUACUCCAGCUUGUGCCUUU...   | 6423  |
| .....UUGUACUCCAGCUUGUGCCUUUU..   | 116   |
| .....UUGUACUCCAGCUUGUGCCUUUUU.   | 14    |
| .....UGUACUCCAGCUUGUG.....       | 221   |
| .....UGUACUCCAGCUUGUGC.....      | 185   |
| .....UGUACUCCAGCUUGUGCC.....     | 448   |
| .....UGUACUCCAGCUUGUGCCU.....    | 571   |
| .....UGUACUCCAGCUUGUGCCUU....    | 3099  |
| .....UGUACUCCAGCUUGUGCCUUU...    | 11430 |
| .....UGUACUCCAGCUUGUGCCUUUU..    | 3321  |
| .....UGUACUCCAGCUUGUGCCUUUUU.    | 331   |
| .....UGUACUCCAGCUUGUGCCUUUUUA    | 2     |
| .....GUACUCCAGCUUGUGC.....       | 60    |
| .....GUACUCCAGCUUGUGCC.....      | 81    |
| .....GUACUCCAGCUUGUGCCU.....     | 110   |
| .....GUACUCCAGCUUGUGCCUU....     | 645   |
| .....GUACUCCAGCUUGUGCCUUU...     | 1568  |
| .....GUACUCCAGCUUGUGCCUUUU..     | 442   |
| .....GUACUCCAGCUUGUGCCUUUUU.     | 109   |
| .....UACUCCAGCUUGUGCC.....       | 19    |
| .....UACUCCAGCUUGUGCCU.....      | 35    |
| .....UACUCCAGCUUGUGCCUU....      | 152   |
| .....UACUCCAGCUUGUGCCUUU...      | 262   |
| .....UACUCCAGCUUGUGCCUUUU..      | 140   |
| .....UACUCCAGCUUGUGCCUUUUU.      | 109   |
| .....UACUCCAGCUUGUGCCUUUUUA      | 3     |
| .....ACUCCAGCUUGUGCCU.....       | 49    |
| .....ACUCCAGCUUGUGCCUU....       | 102   |

|                            |     |
|----------------------------|-----|
| .....ACUCCAGCUUGUGCCUUU... | 107 |
| .....ACUCCAGCUUGUGCCUUUU.. | 29  |
| .....ACUCCAGCUUGUGCCUUUUU. | 11  |
| .....CUCCAGCUUGUGCCUU...   | 91  |
| .....CUCCAGCUUGUGCCUUU...  | 168 |
| .....CUCCAGCUUGUGCCUUUU..  | 33  |
| .....CUCCAGCUUGUGCCUUUUU.  | 6   |
| .....UCCAGCUUGUGCCUUU...   | 59  |
| .....UCCAGCUUGUGCCUUUU..   | 18  |
| .....UCCAGCUUGUGCCUUUUU.   | 4   |
| .....CCAGCUUGUGCCUUUU..    | 23  |
| .....CCAGCUUGUGCCUUUUU.    | 8   |
| .....CAGCUUGUGCCUUUUU.     | 8   |

**#pSUPER macroH2A1 with original H1 promoter**

|                                                                   |       |
|-------------------------------------------------------------------|-------|
| ccacucuuucccGGGUGCAGACAAAUGUGAAuucaagagaUUCACAUUUGUCUGCACCCUUUuuu | Reads |
| .....UUCCCCGGGUGCAGACAAAUGUG.....                                 | 3     |
| .....CCCGGGUGCAGACAAA.....                                        | 44    |
| .....CCCGGGUGCAGACAAAU.....                                       | 27    |
| .....CCCGGGUGCAGACAAAUG.....                                      | 47    |
| .....CCCGGGUGCAGACAAAUGU.....                                     | 63    |
| .....CCCGGGUGCAGACAAAUGUG.....                                    | 116   |
| .....CCCGGGUGCAGACAAAUGUGA.....                                   | 188   |
| .....CCCGGGUGCAGACAAAUGUGAA.....                                  | 431   |
| .....CCCGGGUGCAGACAAAUGUGAAU.....                                 | 281   |
| .....CCCGGGUGCAGACAAAUGUGAAUU.....                                | 47    |
| .....CCCGGGUGCAGACAAAUGUGAAUUC.....                               | 11    |
| .....CCCGGGUGCAGACAAAUGUGAAUUCA.....                              | 4     |
| .....CCCGGGUGCAGACAAAUGUGAAUUCAAG.....                            | 2     |
| .....CCGGGUGCAGACAAAU.....                                        | 83    |
| .....CCGGGUGCAGACAAAUG.....                                       | 95    |
| .....CCGGGUGCAGACAAAUGU.....                                      | 140   |
| .....CCGGGUGCAGACAAAUGUG.....                                     | 301   |
| .....CCGGGUGCAGACAAAUGUGA.....                                    | 347   |
| .....CCGGGUGCAGACAAAUGUGAA.....                                   | 909   |
| .....CCGGGUGCAGACAAAUGUGAAU.....                                  | 4198  |
| .....CCGGGUGCAGACAAAUGUGAAUU.....                                 | 483   |
| .....CCGGGUGCAGACAAAUGUGAAUUC.....                                | 28    |
| .....CCGGGUGCAGACAAAUGUGAAUUCA.....                               | 9     |
| .....CCGGGUGCAGACAAAUGUGAAUUCA.....                               | 9     |
| .....CCGGGUGCAGACAAAUGUGAAUUCAAG.....                             | 8     |
| .....CCGGGUGCAGACAAAUGUGAAUUCAAGA.....                            | 6     |
| .....CGGGUGCAGACAAAUG.....                                        | 96    |
| .....CGGGUGCAGACAAAUGU.....                                       | 124   |
| .....CGGGUGCAGACAAAUGUG.....                                      | 240   |
| .....CGGGUGCAGACAAAUGUGA.....                                     | 280   |
| .....CGGGUGCAGACAAAUGUGAA.....                                    | 481   |



|                                        |      |
|----------------------------------------|------|
| .....CGGGUGCAGACAAAUGUGAAU.....        | 1167 |
| .....CGGGUGCAGACAAAUGUGAAUU.....       | 2044 |
| .....CGGGUGCAGACAAAUGUGAAUUC.....      | 105  |
| .....CGGGUGCAGACAAAUGUGAAUUCA.....     | 25   |
| .....CGGGUGCAGACAAAUGUGAAUUCAA.....    | 10   |
| .....CGGGUGCAGACAAAUGUGAAUUCAAG.....   | 21   |
| .....CGGGUGCAGACAAAUGUGAAUUCAAGA.....  | 16   |
| .....GGGUGCAGACAAAUGU.....             | 664  |
| .....GGGUGCAGACAAAUGUG.....            | 1445 |
| .....GGGUGCAGACAAAUGUGA.....           | 1264 |
| .....GGGUGCAGACAAAUGUGAA.....          | 1607 |
| .....GGGUGCAGACAAAUGUGAAU.....         | 627  |
| .....GGGUGCAGACAAAUGUGAAUU.....        | 202  |
| .....GGGUGCAGACAAAUGUGAAUUC.....       | 89   |
| .....GGGUGCAGACAAAUGUGAAUUCA.....      | 23   |
| .....GGGUGCAGACAAAUGUGAAUUCAA.....     | 22   |
| .....GGGUGCAGACAAAUGUGAAUUCAAG.....    | 73   |
| .....GGGUGCAGACAAAUGUGAAUUCAAGA.....   | 119  |
| .....GGGUGCAGACAAAUGUGAAUUCAAGAG.....  | 24   |
| .....GGGUGCAGACAAAUGUGAAUUCAAGAGA..... | 5    |
| .....GGUGCAGACAAAUGUG.....             | 21   |
| .....GGUGCAGACAAAUGUGA.....            | 12   |
| .....GGUGCAGACAAAUGUGAA.....           | 13   |
| .....GGUGCAGACAAAUGUGAAU.....          | 7    |
| .....GGUGCAGACAAAUGUGAAUU.....         | 3    |
| .....GGUGCAGACAAAUGUGAAUUC.....        | 8    |
| .....GGUGCAGACAAAUGUGAAUUCA.....       | 2    |
| .....GGUGCAGACAAAUGUGAAUUCAAG.....     | 2    |
| .....GUGCAGACAAAUGUGA.....             | 40   |
| .....GUGCAGACAAAUGUGAA.....            | 29   |
| .....GUGCAGACAAAUGUGAAU.....           | 22   |
| .....GUGCAGACAAAUGUGAAUU.....          | 15   |
| .....GUGCAGACAAAUGUGAAUUC.....         | 5    |
| .....GUGCAGACAAAUGUGAAUUCAAG.....      | 9    |
| .....GUGCAGACAAAUGUGAAUUCAAGA.....     | 10   |
| .....GUGCAGACAAAUGUGAAUUCAAGAG.....    | 4    |
| .....GUGCAGACAAAUGUGAAUUCAAGAGA.....   | 6    |
| .....GUGCAGACAAAUGUGAAUUCAAGAGAU.....  | 2    |
| .....UGCAGACAAAUGUGAA.....             | 17   |
| .....UGCAGACAAAUGUGAAU.....            | 9    |
| .....UGCAGACAAAUGUGAAUU.....           | 7    |
| .....UGCAGACAAAUGUGAAUUC.....          | 16   |
| .....UGCAGACAAAUGUGAAUUCA.....         | 5    |
| .....UGCAGACAAAUGUGAAUUCAAG.....       | 3    |
| .....UGCAGACAAAUGUGAAUUCAAGA.....      | 9    |
| .....UGCAGACAAAUGUGAAUUCAAGAG.....     | 10   |
| .....UGCAGACAAAUGUGAAUUCAAGAGA.....    | 5    |

|                                       |    |
|---------------------------------------|----|
| .....UGCAGACAAAUGUGAAUUCAAGAGAU.....  | 5  |
| .....UGCAGACAAAUGUGAAUUCAAGAGAAU..... | 3  |
| .....GCAGACAAAUGUGAAU.....            | 19 |
| .....GCAGACAAAUGUGAAUU.....           | 22 |
| .....GCAGACAAAUGUGAAUUC.....          | 2  |
| .....GCAGACAAAUGUGAAUUCAA.....        | 2  |
| .....GCAGACAAAUGUGAAUUCAAG.....       | 2  |
| .....GCAGACAAAUGUGAAUUCAAGA.....      | 5  |
| .....GCAGACAAAUGUGAAUUCAAGAG.....     | 7  |
| .....GCAGACAAAUGUGAAUUCAAGAGA.....    | 5  |
| .....GCAGACAAAUGUGAAUUCAAGAGAU.....   | 6  |
| .....CAGACAAAUGUGAAUU.....            | 18 |
| .....CAGACAAAUGUGAAUUC.....           | 3  |
| .....CAGACAAAUGUGAAUUCA.....          | 2  |
| .....CAGACAAAUGUGAAUUCAAG.....        | 3  |
| .....CAGACAAAUGUGAAUUCAAGA.....       | 24 |
| .....CAGACAAAUGUGAAUUCAAGAG.....      | 13 |
| .....CAGACAAAUGUGAAUUCAAGAGA.....     | 11 |
| .....CAGACAAAUGUGAAUUCAAGAGAU.....    | 9  |
| .....CAGACAAAUGUGAAUUCAAGAGAAU.....   | 5  |
| .....AGACAAAUGUGAAUUC.....            | 6  |
| .....AGACAAAUGUGAAUUCA.....           | 4  |
| .....AGACAAAUGUGAAUUCAAG.....         | 3  |
| .....AGACAAAUGUGAAUUCAAGA.....        | 10 |
| .....AGACAAAUGUGAAUUCAAGAG.....       | 9  |
| .....AGACAAAUGUGAAUUCAAGAGA.....      | 7  |
| .....AGACAAAUGUGAAUUCAAGAGAU.....     | 3  |
| .....AGACAAAUGUGAAUUCAAGAGAAU.....    | 5  |
| .....AGACAAAUGUGAAUUCAAGAGAAUC.....   | 3  |
| .....AGACAAAUGUGAAUUCAAGAGAAUCAC..... | 3  |
| .....GACAAAUGUGAAUUCA.....            | 3  |
| .....GACAAAUGUGAAUUCAAG.....          | 3  |
| .....GACAAAUGUGAAUUCAAGA.....         | 9  |
| .....GACAAAUGUGAAUUCAAGAG.....        | 11 |
| .....GACAAAUGUGAAUUCAAGAGA.....       | 4  |
| .....GACAAAUGUGAAUUCAAGAGAU.....      | 11 |
| .....GACAAAUGUGAAUUCAAGAGAAU.....     | 13 |
| .....GACAAAUGUGAAUUCAAGAGAAUCAC.....  | 17 |
| .....ACAAAUGUGAAUUCAAG.....           | 4  |
| .....ACAAAUGUGAAUUCAAGA.....          | 17 |
| .....ACAAAUGUGAAUUCAAGAG.....         | 13 |
| .....ACAAAUGUGAAUUCAAGAGA.....        | 12 |
| .....ACAAAUGUGAAUUCAAGAGAU.....       | 10 |
| .....ACAAAUGUGAAUUCAAGAGAAU.....      | 15 |
| .....ACAAAUGUGAAUUCAAGAGAAUCA.....    | 3  |
| .....ACAAAUGUGAAUUCAAGAGAAUCAC.....   | 31 |
| .....ACAAAUGUGAAUUCAAGAGAAUCACA.....  | 14 |

|                                         |    |
|-----------------------------------------|----|
| .....ACAAAUGUGAAUUC AAGAGAUUCACAU.....  | 16 |
| .....ACAAAUGUGAAUUC AAGAGAUUCACAU.....  | 3  |
| .....CAA AUGUGAAUUC AAGA.....           | 6  |
| .....CAA AUGUGAAUUC AAGAG.....          | 8  |
| .....CAA AUGUGAAUUC AAGAGA.....         | 7  |
| .....CAA AUGUGAAUUC AAGAGAU.....        | 5  |
| .....CAA AUGUGAAUUC AAGAGAUU.....       | 4  |
| .....CAA AUGUGAAUUC AAGAGAUUC.....      | 4  |
| .....CAA AUGUGAAUUC AAGAGAUUCA.....     | 2  |
| .....CAA AUGUGAAUUC AAGAGAUUCAC.....    | 50 |
| .....CAA AUGUGAAUUC AAGAGAUUCACA.....   | 20 |
| .....CAA AUGUGAAUUC AAGAGAUUCACAU.....  | 10 |
| .....CAA AUGUGAAUUC AAGAGAUUCACAUU..... | 2  |
| .....AAAUGUGAAUUC AAGA.....             | 16 |
| .....AAAUGUGAAUUC AAGAG.....            | 12 |
| .....AAAUGUGAAUUC AAGAGA.....           | 9  |
| .....AAAUGUGAAUUC AAGAGAU.....          | 8  |
| .....AAAUGUGAAUUC AAGAGAUU.....         | 14 |
| .....AAAUGUGAAUUC AAGAGAUUC.....        | 15 |
| .....AAAUGUGAAUUC AAGAGAUUCA.....       | 18 |
| .....AAAUGUGAAUUC AAGAGAUUCAC.....      | 84 |
| .....AAAUGUGAAUUC AAGAGAUUCACA.....     | 22 |
| .....AAAUGUGAAUUC AAGAGAUUCACAU.....    | 29 |
| .....AAAUGUGAAUUC AAGAGAUUCACAUU.....   | 3  |
| .....AAUGUGAAUUC AAGAG.....             | 2  |
| .....AAUGUGAAUUC AAGAGA.....            | 3  |
| .....AAUGUGAAUUC AAGAGAU.....           | 8  |
| .....AAUGUGAAUUC AAGAGAUU.....          | 19 |
| .....AAUGUGAAUUC AAGAGAUUC.....         | 11 |
| .....AAUGUGAAUUC AAGAGAUUCA.....        | 11 |
| .....AAUGUGAAUUC AAGAGAUUCAC.....       | 29 |
| .....AAUGUGAAUUC AAGAGAUUCACA.....      | 13 |
| .....AAUGUGAAUUC AAGAGAUUCACAU.....     | 8  |
| .....AUGUGAAUUC AAGAGA.....             | 9  |
| .....AUGUGAAUUC AAGAGAU.....            | 7  |
| .....AUGUGAAUUC AAGAGAUU.....           | 17 |
| .....AUGUGAAUUC AAGAGAUUC.....          | 7  |
| .....AUGUGAAUUC AAGAGAUUCA.....         | 8  |
| .....AUGUGAAUUC AAGAGAUUCAC.....        | 19 |
| .....AUGUGAAUUC AAGAGAUUCACA.....       | 3  |
| .....UGUGAAUUC AAGAGAU.....             | 6  |
| .....UGUGAAUUC AAGAGAUU.....            | 24 |
| .....UGUGAAUUC AAGAGAUUC.....           | 8  |
| .....UGUGAAUUC AAGAGAUUCA.....          | 12 |
| .....UGUGAAUUC AAGAGAUUCACAUU.....      | 3  |
| .....GUGAAUUC AAGAGAUU.....             | 55 |
| .....GUGAAUUC AAGAGAUUC.....            | 16 |

|                                        |     |
|----------------------------------------|-----|
| .....GUGAAUUCAAGAGAUUCA.....           | 9   |
| .....UGAAUUCAAGAGAUUC.....             | 10  |
| .....UGAAUUCAAGAGAUUCA.....            | 7   |
| .....UGAAUUCAAGAGAUUCAC.....           | 6   |
| .....UGAAUUCAAGAGAUUCACA.....          | 18  |
| .....UGAAUUCAAGAGAUUCACAUU.....        | 2   |
| .....GAAUUCAAGAGAUUCA.....             | 14  |
| .....GAAUUCAAGAGAUUCAC.....            | 96  |
| .....GAAUUCAAGAGAUUCACA.....           | 6   |
| .....GAAUUCAAGAGAUUCACAU.....          | 10  |
| .....GAAUUCAAGAGAUUCACAUU.....         | 9   |
| .....GAAUUCAAGAGAUUCACAUUU.....        | 7   |
| .....GAAUUCAAGAGAUUCACAUUUGU.....      | 3   |
| .....GAAUUCAAGAGAUUCACAUUUGUC.....     | 2   |
| .....GAAUUCAAGAGAUUCACAUUUGUCU.....    | 2   |
| .....GAAUUCAAGAGAUUCACAUUUGUCUG.....   | 4   |
| .....GAAUUCAAGAGAUUCACAUUUGUCUGC.....  | 2   |
| .....GAAUUCAAGAGAUUCACAUUUGUCUGCA..... | 5   |
| .....AAUUCAAGAGAUUCAC.....             | 647 |
| .....AAUUCAAGAGAUUCACA.....            | 156 |
| .....AAUUCAAGAGAUUCACAU.....           | 189 |
| .....AAUUCAAGAGAUUCACAUU.....          | 52  |
| .....AAUUCAAGAGAUUCACAUUU.....         | 48  |
| .....AAUUCAAGAGAUUCACAUUUG.....        | 4   |
| .....AAUUCAAGAGAUUCACAUUUGU.....       | 9   |
| .....AAUUCAAGAGAUUCACAUUUGUC.....      | 13  |
| .....AAUUCAAGAGAUUCACAUUUGUCU.....     | 9   |
| .....AAUUCAAGAGAUUCACAUUUGUCUG.....    | 39  |
| .....AAUUCAAGAGAUUCACAUUUGUCUGC.....   | 19  |
| .....AAUUCAAGAGAUUCACAUUUGUCUGCA.....  | 32  |
| .....AAUUCAAGAGAUUCACAUUUGUCUGCAC..... | 37  |
| .....AUUCAAGAGAUUCACA.....             | 47  |
| .....AUUCAAGAGAUUCACAU.....            | 63  |
| .....AUUCAAGAGAUUCACAUU.....           | 17  |
| .....AUUCAAGAGAUUCACAUUU.....          | 19  |
| .....AUUCAAGAGAUUCACAUUUG.....         | 10  |
| .....AUUCAAGAGAUUCACAUUUGU.....        | 21  |
| .....AUUCAAGAGAUUCACAUUUGUC.....       | 13  |
| .....AUUCAAGAGAUUCACAUUUGUCU.....      | 35  |
| .....AUUCAAGAGAUUCACAUUUGUCUG.....     | 114 |
| .....AUUCAAGAGAUUCACAUUUGUCUGC.....    | 60  |
| .....AUUCAAGAGAUUCACAUUUGUCUGCA.....   | 144 |
| .....AUUCAAGAGAUUCACAUUUGUCUGCAC.....  | 145 |
| .....AUUCAAGAGAUUCACAUUUGUCUGCACC..... | 6   |
| .....UUUCAAGAGAUUCACAU.....            | 34  |
| .....UUUCAAGAGAUUCACAUU.....           | 20  |
| .....UUUCAAGAGAUUCACAUUU.....          | 26  |

|                                        |     |
|----------------------------------------|-----|
| .....UUCAAGAGAUUCACAUUUG.....          | 16  |
| .....UUCAAGAGAUUCACAUUUGU.....         | 23  |
| .....UUCAAGAGAUUCACAUUUGUC.....        | 20  |
| .....UUCAAGAGAUUCACAUUUGUCU.....       | 85  |
| .....UUCAAGAGAUUCACAUUUGUCUG.....      | 142 |
| .....UUCAAGAGAUUCACAUUUGUCUGC.....     | 132 |
| .....UUCAAGAGAUUCACAUUUGUCUGCA.....    | 159 |
| .....UUCAAGAGAUUCACAUUUGUCUGCAC.....   | 231 |
| .....UUCAAGAGAUUCACAUUUGUCUGCACC.....  | 36  |
| .....UUCAAGAGAUUCACAUUUGUCUGCACCC..... | 15  |
| .....UCAAGAGAUUCACAUU.....             | 23  |
| .....UCAAGAGAUUCACAUUU.....            | 29  |
| .....UCAAGAGAUUCACAUUUG.....           | 13  |
| .....UCAAGAGAUUCACAUUUGU.....          | 36  |
| .....UCAAGAGAUUCACAUUUGUC.....         | 22  |
| .....UCAAGAGAUUCACAUUUGUCU.....        | 60  |
| .....UCAAGAGAUUCACAUUUGUCUG.....       | 188 |
| .....UCAAGAGAUUCACAUUUGUCUGC.....      | 102 |
| .....UCAAGAGAUUCACAUUUGUCUGCA.....     | 187 |
| .....UCAAGAGAUUCACAUUUGUCUGCAC.....    | 333 |
| .....UCAAGAGAUUCACAUUUGUCUGCACC.....   | 59  |
| .....UCAAGAGAUUCACAUUUGUCUGCACCC.....  | 32  |
| .....UCAAGAGAUUCACAUUUGUCUGCACCCU..... | 16  |
| .....CAAGAGAUUCACAUUU.....             | 12  |
| .....CAAGAGAUUCACAUUUG.....            | 5   |
| .....CAAGAGAUUCACAUUUGU.....           | 6   |
| .....CAAGAGAUUCACAUUUGUC.....          | 8   |
| .....CAAGAGAUUCACAUUUGUCU.....         | 24  |
| .....CAAGAGAUUCACAUUUGUCUG.....        | 42  |
| .....CAAGAGAUUCACAUUUGUCUGC.....       | 31  |
| .....CAAGAGAUUCACAUUUGUCUGCA.....      | 40  |
| .....CAAGAGAUUCACAUUUGUCUGCAC.....     | 78  |
| .....CAAGAGAUUCACAUUUGUCUGCACC.....    | 18  |
| .....CAAGAGAUUCACAUUUGUCUGCACCC.....   | 14  |
| .....CAAGAGAUUCACAUUUGUCUGCACCCU.....  | 9   |
| .....CAAGAGAUUCACAUUUGUCUGCACCCUU..... | 32  |
| .....AAGAGAUUCACAUUUG.....             | 10  |
| .....AAGAGAUUCACAUUUGU.....            | 23  |
| .....AAGAGAUUCACAUUUGUC.....           | 6   |
| .....AAGAGAUUCACAUUUGUCU.....          | 12  |
| .....AAGAGAUUCACAUUUGUCUG.....         | 12  |
| .....AAGAGAUUCACAUUUGUCUGC.....        | 13  |
| .....AAGAGAUUCACAUUUGUCUGCA.....       | 19  |
| .....AAGAGAUUCACAUUUGUCUGCAC.....      | 43  |
| .....AAGAGAUUCACAUUUGUCUGCACC.....     | 13  |
| .....AAGAGAUUCACAUUUGUCUGCACCC.....    | 15  |
| .....AAGAGAUUCACAUUUGUCUGCACCCU.....   | 10  |

|                                        |     |
|----------------------------------------|-----|
| .....AAGAGAUUCACAUUUGUCUGCACCCUU.....  | 82  |
| .....AAGAGAUUCACAUUUGUCUGCACCCUUU..... | 16  |
| .....AGAGAUUCACAUUUGU.....             | 15  |
| .....AGAGAUUCACAUUUGUC.....            | 17  |
| .....AGAGAUUCACAUUUGUCU.....           | 12  |
| .....AGAGAUUCACAUUUGUCUG.....          | 13  |
| .....AGAGAUUCACAUUUGUCUGC.....         | 11  |
| .....AGAGAUUCACAUUUGUCUGCA.....        | 11  |
| .....AGAGAUUCACAUUUGUCUGCAC.....       | 29  |
| .....AGAGAUUCACAUUUGUCUGCACC.....      | 46  |
| .....AGAGAUUCACAUUUGUCUGCACCC.....     | 207 |
| .....AGAGAUUCACAUUUGUCUGCACCCU.....    | 128 |
| .....AGAGAUUCACAUUUGUCUGCACCCUU.....   | 69  |
| .....AGAGAUUCACAUUUGUCUGCACCCUUU.....  | 28  |
| .....GAGAUUCACAUUUGUC.....             | 20  |
| .....GAGAUUCACAUUUGUCU.....            | 24  |
| .....GAGAUUCACAUUUGUCUG.....           | 25  |
| .....GAGAUUCACAUUUGUCUGC.....          | 9   |
| .....GAGAUUCACAUUUGUCUGCA.....         | 35  |
| .....GAGAUUCACAUUUGUCUGCAC.....        | 50  |
| .....GAGAUUCACAUUUGUCUGCACC.....       | 8   |
| .....GAGAUUCACAUUUGUCUGCACCC.....      | 43  |
| .....GAGAUUCACAUUUGUCUGCACCCU.....     | 38  |
| .....GAGAUUCACAUUUGUCUGCACCCUU.....    | 131 |
| .....GAGAUUCACAUUUGUCUGCACCCUUU.....   | 92  |
| .....GAGAUUCACAUUUGUCUGCACCCUUUU.....  | 6   |
| .....AGAUUCACAUUUGUCU.....             | 29  |
| .....AGAUUCACAUUUGUCUG.....            | 66  |
| .....AGAUUCACAUUUGUCUGC.....           | 12  |
| .....AGAUUCACAUUUGUCUGCA.....          | 46  |
| .....AGAUUCACAUUUGUCUGCAC.....         | 64  |
| .....AGAUUCACAUUUGUCUGCACC.....        | 11  |
| .....AGAUUCACAUUUGUCUGCACCC.....       | 75  |
| .....AGAUUCACAUUUGUCUGCACCCU.....      | 52  |
| .....AGAUUCACAUUUGUCUGCACCCUU.....     | 196 |
| .....AGAUUCACAUUUGUCUGCACCCUUU.....    | 143 |
| .....AGAUUCACAUUUGUCUGCACCCUUUU.....   | 12  |
| .....AGAUUCACAUUUGUCUGCACCCUUUUU.....  | 2   |
| .....GAUUCACAUUUGUCUG.....             | 66  |
| .....GAUUCACAUUUGUCUGC.....            | 28  |
| .....GAUUCACAUUUGUCUGCA.....           | 83  |
| .....GAUUCACAUUUGUCUGCAC.....          | 221 |
| .....GAUUCACAUUUGUCUGCACC.....         | 33  |
| .....GAUUCACAUUUGUCUGCACCC.....        | 89  |
| .....GAUUCACAUUUGUCUGCACCCU.....       | 128 |
| .....GAUUCACAUUUGUCUGCACCCUU.....      | 458 |
| .....GAUUCACAUUUGUCUGCACCCUUU.....     | 493 |

|                                   |      |
|-----------------------------------|------|
| .....GAUUCACAUUUGUCUGCACCCUUUU..  | 39   |
| .....GAUUCACAUUUGUCUGCACCCUUUUU.  | 5    |
| .....AUUCACAUUUGUCUGC.....        | 20   |
| .....AUUCACAUUUGUCUGCA.....       | 91   |
| .....AUUCACAUUUGUCUGCAC.....      | 171  |
| .....AUUCACAUUUGUCUGCACC.....     | 27   |
| .....AUUCACAUUUGUCUGCACCC.....    | 84   |
| .....AUUCACAUUUGUCUGCACCCU.....   | 66   |
| .....AUUCACAUUUGUCUGCACCCUU.....  | 317  |
| .....AUUCACAUUUGUCUGCACCCUUU..... | 273  |
| .....AUUCACAUUUGUCUGCACCCUUUU..   | 28   |
| .....AUUCACAUUUGUCUGCACCCUUUUU.   | 5    |
| .....UUCACAUUUGUCUGCA.....        | 78   |
| .....UUCACAUUUGUCUGCAC.....       | 154  |
| .....UUCACAUUUGUCUGCACC.....      | 64   |
| .....UUCACAUUUGUCUGCACCC.....     | 222  |
| .....UUCACAUUUGUCUGCACCCU.....    | 658  |
| .....UUCACAUUUGUCUGCACCCUU.....   | 3259 |
| .....UUCACAUUUGUCUGCACCCUUU.....  | 7122 |
| .....UUCACAUUUGUCUGCACCCUUUU..    | 221  |
| .....UUCACAUUUGUCUGCACCCUUUUU.    | 23   |
| .....UCACAUUUGUCUGCAC.....        | 108  |
| .....UCACAUUUGUCUGCACC.....       | 43   |
| .....UCACAUUUGUCUGCACCC.....      | 101  |
| .....UCACAUUUGUCUGCACCCU.....     | 268  |
| .....UCACAUUUGUCUGCACCCUU.....    | 900  |
| .....UCACAUUUGUCUGCACCCUUU.....   | 3154 |
| .....UCACAUUUGUCUGCACCCUUUU..     | 809  |
| .....UCACAUUUGUCUGCACCCUUUUU.     | 75   |
| .....CACAUUUGUCUGCACC.....        | 24   |
| .....CACAUUUGUCUGCACCC.....       | 35   |
| .....CACAUUUGUCUGCACCCU.....      | 64   |
| .....CACAUUUGUCUGCACCCUU.....     | 271  |
| .....CACAUUUGUCUGCACCCUUU.....    | 345  |
| .....CACAUUUGUCUGCACCCUUUU..      | 59   |
| .....CACAUUUGUCUGCACCCUUUUU.      | 10   |
| .....ACAUUUGUCUGCACCC.....        | 11   |
| .....ACAUUUGUCUGCACCCU.....       | 44   |
| .....ACAUUUGUCUGCACCCUU.....      | 114  |
| .....ACAUUUGUCUGCACCCUUU.....     | 116  |
| .....ACAUUUGUCUGCACCCUUUU..       | 21   |
| .....ACAUUUGUCUGCACCCUUUUU.       | 2    |
| .....CAUUUGUCUGCACCCU.....        | 390  |
| .....CAUUUGUCUGCACCCUU.....       | 548  |
| .....CAUUUGUCUGCACCCUUU.....      | 351  |
| .....CAUUUGUCUGCACCCUUUU..        | 54   |
| .....CAUUUGUCUGCACCCUUUUU.        | 6    |

|                            |     |
|----------------------------|-----|
| .....AUUUGUCUGCACCCUU..... | 818 |
| .....AUUUGUCUGCACCCUUU..   | 632 |
| .....AUUUGUCUGCACCCUUUU..  | 69  |
| .....AUUUGUCUGCACCCUUUUU.. | 6   |
| .....UUUGUCUGCACCCUUU..    | 211 |
| .....UUUGUCUGCACCCUUUU..   | 28  |
| .....UUUGUCUGCACCCUUUUU..  | 5   |
| .....UUGUCUGCACCCUUUU..    | 33  |
| .....UUGUCUGCACCCUUUUU..   | 12  |
| .....UGUCUGCACCCUUUUU..    | 2   |

**#pri-miR-155**

| gcugUUA AUGCUAAUCGUGAUAGGGGUUuuugccuccaacugaCUCCUACAUAUUAGCAUUAACAgugu | Reads |
|------------------------------------------------------------------------|-------|
| ...GUUAAUGCUAAUCGUG.....                                               | 2     |
| ...GUUAAUGCUAAUCGUGAUAGGG.....                                         | 2     |
| ...GUUAAUGCUAAUCGUGAUAGGGG.....                                        | 4     |
| ...GUUAAUGCUAAUCGUGAUAGGGGU.....                                       | 4     |
| ...GUUAAUGCUAAUCGUGAUAGGGGUU.....                                      | 27    |
| ...GUUAAUGCUAAUCGUGAUAGGGGUUU.....                                     | 5     |
| ...UUA AUGCUAAUCGUGA.....                                              | 9     |
| ...UUA AUGCUAAUCGUGAU.....                                             | 49    |
| ...UUA AUGCUAAUCGUGAUA.....                                            | 74    |
| ...UUA AUGCUAAUCGUGAUAG.....                                           | 106   |
| ...UUA AUGCUAAUCGUGAUAGG.....                                          | 680   |
| ...UUA AUGCUAAUCGUGAUAGGG.....                                         | 2983  |
| ...UUA AUGCUAAUCGUGAUAGGGG.....                                        | 4477  |
| ...UUA AUGCUAAUCGUGAUAGGGGU.....                                       | 14262 |
| ...UUA AUGCUAAUCGUGAUAGGGGUU.....                                      | 46843 |
| ...UUA AUGCUAAUCGUGAUAGGGGUUU.....                                     | 9257  |
| ...UUA AUGCUAAUCGUGAUAGGGGUUUU.....                                    | 1031  |
| ...UUA AUGCUAAUCGUGAUAGGGGUUUUU.....                                   | 163   |
| ...UAAUGCUAAUCGUGAUAG.....                                             | 2     |
| ...UAAUGCUAAUCGUGAUAGG.....                                            | 11    |
| ...UAAUGCUAAUCGUGAUAGGG.....                                           | 37    |
| ...UAAUGCUAAUCGUGAUAGGGG.....                                          | 68    |
| ...UAAUGCUAAUCGUGAUAGGGGU.....                                         | 254   |
| ...UAAUGCUAAUCGUGAUAGGGGUU.....                                        | 952   |
| ...UAAUGCUAAUCGUGAUAGGGGUUU.....                                       | 189   |
| ...UAAUGCUAAUCGUGAUAGGGGUUUU.....                                      | 23    |
| ...UAAUGCUAAUCGUGAUAGGGGUUUUU.....                                     | 12    |
| ...UAAUGCUAAUCGUGAUAGGGGUUUUUG.....                                    | 3     |
| ...AAUGCUAAUCGUGAUAGG.....                                             | 5     |
| ...AAUGCUAAUCGUGAUAGGG.....                                            | 10    |
| ...AAUGCUAAUCGUGAUAGGGG.....                                           | 22    |
| ...AAUGCUAAUCGUGAUAGGGGU.....                                          | 67    |
| ...AAUGCUAAUCGUGAUAGGGGUU.....                                         | 276   |
| ...AAUGCUAAUCGUGAUAGGGGUUU.....                                        | 61    |



|                                         |     |
|-----------------------------------------|-----|
| .....AAUGC AAAUCGUGAUAGGGGUUUU.....     | 7   |
| .....AAUGC AAAUCGUGAUAGGGGUUUUU.....    | 8   |
| .....AAUGC AAAUCGUGAUAGGGGUUUUUUG.....  | 4   |
| .....AAUGC AAAUCGUGAUAGGGGUUUUUUGC..... | 2   |
| .....AUGC AAAUCGUGAUAGG.....            | 3   |
| .....AUGC AAAUCGUGAUAGGG.....           | 13  |
| .....AUGC AAAUCGUGAUAGGGG.....          | 16  |
| .....AUGC AAAUCGUGAUAGGGGU.....         | 58  |
| .....AUGC AAAUCGUGAUAGGGGUU.....        | 208 |
| .....AUGC AAAUCGUGAUAGGGGUUU.....       | 45  |
| .....AUGC AAAUCGUGAUAGGGGUUUU.....      | 5   |
| .....UGC AAAUCGUGAUAGG.....             | 3   |
| .....UGC AAAUCGUGAUAGGG.....            | 6   |
| .....UGC AAAUCGUGAUAGGGG.....           | 13  |
| .....UGC AAAUCGUGAUAGGGGU.....          | 26  |
| .....UGC AAAUCGUGAUAGGGGUU.....         | 106 |
| .....UGC AAAUCGUGAUAGGGGUUU.....        | 23  |
| .....UGC AAAUCGUGAUAGGGGUUUU.....       | 4   |
| .....UGC AAAUCGUGAUAGGGGUUUUU.....      | 3   |
| .....GCU AAAUCGUGAUAGG.....             | 26  |
| .....GCU AAAUCGUGAUAGGG.....            | 44  |
| .....GCU AAAUCGUGAUAGGGGU.....          | 121 |
| .....GCU AAAUCGUGAUAGGGGUU.....         | 448 |
| .....GCU AAAUCGUGAUAGGGGUUU.....        | 101 |
| .....GCU AAAUCGUGAUAGGGGUUUU.....       | 13  |
| .....GCU AAAUCGUGAUAGGGGUUUUU.....      | 5   |
| .....CUA AAAUCGUGAUAGGGG.....           | 14  |
| .....CUA AAAUCGUGAUAGGGGU.....          | 41  |
| .....CUA AAAUCGUGAUAGGGGUU.....         | 137 |
| .....CUA AAAUCGUGAUAGGGGUUU.....        | 37  |
| .....UAAUCGUGAUAGGGGU.....              | 55  |
| .....UAAUCGUGAUAGGGGUU.....             | 147 |
| .....UAAUCGUGAUAGGGGUUU.....            | 41  |
| .....UAAUCGUGAUAGGGGUUUU.....           | 7   |
| .....UAAUCGUGAUAGGGGUUUUU.....          | 7   |
| .....AAUCGUGAUAGGGGUU.....              | 158 |
| .....AAUCGUGAUAGGGGUUU.....             | 31  |
| .....AAUCGUGAUAGGGGUUUU.....            | 4   |
| .....AAUCGUGAUAGGGGUUUUU.....           | 5   |
| .....AAUCGUGAUAGGGGUUUUUUG.....         | 2   |
| .....AUCGUGAUAGGGGUUU.....              | 13  |
| .....AUCGUGAUAGGGGUUUU.....             | 2   |
| .....UCGUGAUAGGGGUUUU.....              | 6   |
| .....UCGUGAUAGGGGUUUUU.....             | 10  |
| .....CGUGAUAGGGGUUUUU.....              | 14  |
| .....CGUGAUAGGGGUUUUUUGCCU.....         | 2   |
| .....CGUGAUAGGGGUUUUUUGCCUCCAAC.....    | 2   |

|                                       |      |
|---------------------------------------|------|
| .....GAUAGGGUUUUUGCCUCCAACUGACU.....  | 2    |
| .....UAGGGUUUUUGCCUCCAACUGACU.....    | 2    |
| .....GGGGUUUUUGCCUCCAACUGA.....       | 2    |
| .....GGGGUUUUUGCCUCCAACUGAC.....      | 2    |
| .....GGUUUUUGCCUCCAACUG.....          | 5    |
| .....GGUUUUUGCCUCCAACUGACUCC.....     | 3    |
| .....UUUUUGCCUCCAACUGACUCC.....       | 2    |
| .....UUUUGCCUCCAACUGA.....            | 2    |
| .....CAACUGACUCCUACAUAU.....          | 4    |
| .....AACUGACUCCUACAUAU.....           | 3    |
| .....ACUGACUCCUACAUAU.....            | 3    |
| .....ACUGACUCCUACAUAUUAGCAUUAACA..... | 22   |
| .....CUGACUCCUACAUAUUAGCAUUA.....     | 2    |
| .....CUGACUCCUACAUAUUAGCAUUAACA.....  | 23   |
| .....UGACUCCUACAUAUUAGCAUUA.....      | 2    |
| .....UGACUCCUACAUAUUAGCAUUAAC.....    | 4    |
| .....UGACUCCUACAUAUUAGCAUUAACA.....   | 57   |
| .....GACUCCUACAUAUUAGCAUUAAC.....     | 17   |
| .....GACUCCUACAUAUUAGCAUUAACA.....    | 21   |
| .....ACUCCUACAUAUUAGCAUUA.....        | 2    |
| .....ACUCCUACAUAUUAGCAUUAAC.....      | 15   |
| .....ACUCCUACAUAUUAGCAUUAACA.....     | 36   |
| .....CUCCUACAUAUUAGCAUUA.....         | 14   |
| .....CUCCUACAUAUUAGCAUUAAC.....       | 488  |
| .....CUCCUACAUAUUAGCAUUAACA.....      | 1004 |
| .....UCCUACAUAUUAGCAUUAAC.....        | 16   |
| .....UCCUACAUAUUAGCAUUAACA.....       | 33   |
| .....UCCUACAUAUUAGCAUUAACAGUGU.....   | 3    |
| .....CCUACAUAUUAGCAUUAAC.....         | 6    |
| .....CCUACAUAUUAGCAUUAACA.....        | 17   |
| .....CCUACAUAUUAGCAUUAACAGUGU.....    | 2    |
| .....CUACAUAUUAGCAUUAAC.....          | 5    |
| .....CUACAUAUUAGCAUUAACA.....         | 24   |
| .....UACAUAUUAGCAUUAAC.....           | 9    |
| .....UACAUAUUAGCAUUAACA.....          | 20   |
| .....UACAUAUUAGCAUUAACAGUG.....       | 2    |
| .....ACAUAUUAGCAUUAAC.....            | 14   |
| .....ACAUAUUAGCAUUAACA.....           | 20   |
| .....CAUAUUAGCAUUAACA.....            | 9    |

**#hsa-Pri-miR-223**

|                              |                                               |       |
|------------------------------|-----------------------------------------------|-------|
| cucCGUGUAUUUGACAAGCUGAGU     | UggacacuccaugugguagagUGUCAGUUUGUCAAUACCCCAagu | Reads |
| ..CCGUGUAUUUGACAAGCUGAG..... |                                               | 2     |
| ..CGUGUAUUUGACAAGCUG.....    |                                               | 3     |
| ..CGUGUAUUUGACAAGCUGA.....   |                                               | 6     |
| ..CGUGUAUUUGACAAGCUGAG.....  |                                               | 3     |
| ..CGUGUAUUUGACAAGCUGAGU..... |                                               | 18    |

|                                     |    |
|-------------------------------------|----|
| ...CGUGUAUUUGACAAGCUGAGUU.....      | 28 |
| ...CGUGUAUUUGACAAGCUGAGUUG.....     | 35 |
| ...CGUGUAUUUGACAAGCUGAGUUGG.....    | 82 |
| ...CGUGUAUUUGACAAGCUGAGUUGGA.....   | 51 |
| ...CGUGUAUUUGACAAGCUGAGUUGGAC.....  | 46 |
| ...CGUGUAUUUGACAAGCUGAGUUGGACA..... | 59 |
| ...GUGUAUUUGACAAGCUGAGUU.....       | 5  |
| ...GUGUAUUUGACAAGCUGAGUUG.....      | 2  |
| ...GUGUAUUUGACAAGCUGAGUUGGA.....    | 2  |
| ...GUGUAUUUGACAAGCUGAGUUGGAC.....   | 4  |
| ...GUGUAUUUGACAAGCUGAGUUGGACA.....  | 2  |
| ...GUGUAUUUGACAAGCUGAGUUGGACAC..... | 6  |
| ...UGUAUUUGACAAGCUGAGUUGGACACU..... | 12 |
| ...GUAUUUGACAAGCUGAGUUGG.....       | 2  |
| ...GUAUUUGACAAGCUGAGUUGGA.....      | 2  |
| ...GUAUUUGACAAGCUGAGUUGGACA.....    | 2  |
| ...GUAUUUGACAAGCUGAGUUGGACAC.....   | 2  |
| ...GUAUUUGACAAGCUGAGUUGGACACU.....  | 37 |
| ...GUAUUUGACAAGCUGAGUUGGACACUC..... | 2  |
| ...UAUUUGACAAGCUGAGUUGGACACU.....   | 14 |
| ...AUUUGACAAGCUGAGUU.....           | 5  |
| ...AUUUGACAAGCUGAGUUGGACAC.....     | 3  |
| ...AUUUGACAAGCUGAGUUGGACACU.....    | 45 |
| ...UUUGACAAGCUGAGUUGGA.....         | 2  |
| ...UUUGACAAGCUGAGUUGGACACU.....     | 24 |
| ...UUGACAAGCUGAGUUGG.....           | 2  |
| ...UUGACAAGCUGAGUUGGACAC.....       | 4  |
| ...UUGACAAGCUGAGUUGGACACU.....      | 16 |
| ...UGACAAGCUGAGUUGGACACU.....       | 12 |
| ...GACAAGCUGAGUUGGAC.....           | 2  |
| ...GACAAGCUGAGUUGGACACU.....        | 2  |
| ...AAGCUGAGUUGGACACU.....           | 2  |
| ...UGGACACUCCAUGUGGUAGAGUGU.....    | 2  |
| ...ACACUCCAUGUGGUAGAGUGUCAGUUU..... | 2  |
| ...UCCAUGUGGUAGAGUGUCAG.....        | 2  |
| ...UCCAUGUGGUAGAGUGUCAGUUUGUC.....  | 2  |
| ...AUGUGGUAGAGUGUCAGUU.....         | 2  |
| ...GUAGAGUGUCAGUUUGUCAAAUACCCC..... | 2  |
| ...AGAGUGUCAGUUUGUCAAAUACCCC.....   | 2  |
| ...AGAGUGUCAGUUUGUCAAAUACCCC.....   | 3  |
| ...AGAGUGUCAGUUUGUCAAAUACCCCA.....  | 2  |
| ...AGAGUGUCAGUUUGUCAAAUACCCCAA..... | 6  |
| ...GAGUGUCAGUUUGUCAAAUACCCC.....    | 5  |
| ...GAGUGUCAGUUUGUCAAAUACCCCA.....   | 5  |
| ...GAGUGUCAGUUUGUCAAAUACCCCAA.....  | 12 |
| ...AGUGUCAGUUUGUCAAAUACCCC.....     | 2  |
| ...AGUGUCAGUUUGUCAAAUACCCCAA.....   | 3  |

|                                 |       |
|---------------------------------|-------|
| .....GUGUCAGUUUGUCAAUACC.....   | 4     |
| .....GUGUCAGUUUGUCAAUACC.....   | 7     |
| .....GUGUCAGUUUGUCAAUACCCC..... | 85    |
| .....GUGUCAGUUUGUCAAUACCCCA...  | 113   |
| .....GUGUCAGUUUGUCAAUACCCCAA..  | 151   |
| .....UGUCAGUUUGUCAAU.....       | 31    |
| .....UGUCAGUUUGUCAAUA.....      | 27    |
| .....UGUCAGUUUGUCAAUAC.....     | 21    |
| .....UGUCAGUUUGUCAAUACC.....    | 130   |
| .....UGUCAGUUUGUCAAUACCC.....   | 261   |
| .....UGUCAGUUUGUCAAUACCCC.....  | 2081  |
| .....UGUCAGUUUGUCAAUACCCCA...   | 30340 |
| .....UGUCAGUUUGUCAAUACCCCAA..   | 32637 |
| .....UGUCAGUUUGUCAAUACCCCAAG.   | 63    |
| .....GUCAGUUUGUCAAUAC.....      | 6     |
| .....GUCAGUUUGUCAAUACC.....     | 7     |
| .....GUCAGUUUGUCAAUACCC.....    | 14    |
| .....GUCAGUUUGUCAAUACCCC.....   | 73    |
| .....GUCAGUUUGUCAAUACCCCA...    | 796   |
| .....GUCAGUUUGUCAAUACCCCAA..    | 5740  |
| .....GUCAGUUUGUCAAUACCCCAAG.    | 10    |
| .....UCAGUUUGUCAAUACCCC.....    | 7     |
| .....UCAGUUUGUCAAUACCCCA...     | 88    |
| .....UCAGUUUGUCAAUACCCCAA..     | 177   |
| .....UCAGUUUGUCAAUACCCCAAG.     | 4     |
| .....CAGUUUGUCAAUACCC.....      | 2     |
| .....CAGUUUGUCAAUACCCC.....     | 18    |
| .....CAGUUUGUCAAUACCCCA...      | 164   |
| .....CAGUUUGUCAAUACCCCAA..      | 285   |
| .....AGUUUGUCAAUACCCC.....      | 7     |
| .....AGUUUGUCAAUACCCCA...       | 89    |
| .....AGUUUGUCAAUACCCCAA..       | 169   |
| .....GUUUGUCAAUACCCC.....       | 11    |
| .....GUUUGUCAAUACCCCA...        | 69    |
| .....GUUUGUCAAUACCCCAA..        | 191   |
| .....GUUUGUCAAUACCCCAAG.        | 2     |
| .....UUUGUCAAUACCCCA...         | 154   |
| .....UUUGUCAAUACCCCAA..         | 451   |
| .....UUUGUCAAUACCCCAAG.         | 3     |
| .....UUGUCAAUACCCCAA..          | 778   |
| .....UUGUCAAUACCCCAAG.          | 3     |
