# Supplementary material for: Pol III Promoters to Express Small RNAs: Delineation of Transcription Initiation
Source: PubMed Central journal article supplement — Mol Ther Nucleic Acids. 2014 May 6;3(5):e161–. doi: 10.1038/mtna.2014.12 (PMC4040628; doi:10.1038/mtna.2014.12), 2014-05-06
Supplement: mtna201412x7.pdf [file mtna201412x7.pdf]

**Table S2**

**#Pri-miR-30/NCCR5**

|                                                                     | Reads  | %     |
|---------------------------------------------------------------------|--------|-------|
| CGACGGUGUAAACUGAGCUUGCUCGCGUGAAGCCACAGAUGGCGAGCAAGCUCCGUUUACACGGCUG |        |       |
| .GACGGUGUAAACUGAGCUUGCXXXX                                          | 11     | 0.01  |
| ..ACGGUGUAAACUGAGCUUGCXXXX                                          | 91     | 0.05  |
| ...CGGUGUAAACUGAGCUUGCXXXX                                          | 62     | 0.03  |
| ....GGUGUAAACUGAGCUUGCXXXXXXX                                       | 181291 | 95.76 |
| .....GUGUAAACUGAGCUUGCXXXXXX                                        | 2260   | 1.19  |
| .....UGUAAACUGAGCUUGCXXXXXX                                         | 1877   | 0.99  |
| .....GUAACUGAGCUUGCUCXXXX                                           | 2724   | 1.44  |
| .....UAAACUGAGCUUGCUCGXXX                                           | 383    | 0.20  |
| .....AAACUGAGCUUGCUCGXXX                                            | 419    | 0.22  |
| .....AACUGAGCUUGCUCGX                                               | 188    | 0.10  |
| .....ACUGAGCUUGCUCGCGX                                              | 6      | 0.00  |
| .....CUGAGCUUGCUCGCGU                                               | 2      | 0.00  |
| .....CUCGCGUGAAGCCACAGAUGG                                          | 2      |       |
| .....CGCGUGAAGCCACAGAUGG                                            | 2      |       |
| .....CGUGAAGCCACAGAUGGXX                                            | 133    |       |
| .....GUGAAGCCACAGAUGGXXXX                                           | 1881   |       |
| .....UGAAGCCACAGAUGGXX                                              | 39     |       |
| .....GAAGCCACAGAUGGCG                                               | 4      |       |
| .....CCACAGAUGGCGAGCAAGCUCCGUUU                                     | 2      |       |
| .....CACAGAUGGCGAGCAAGCUCCGUUU                                      | 2      |       |
| .....CAGAUGGCGAGCAAGCUXXXXXXXXXXX                                   | 7      |       |
| .....UGGCGAGCAAGCUCCGUUUACACGGC                                     | 2      | 0.00  |
| .....GGCGAGCAAGCUCCGUUUAC                                           | 2      | 0.00  |
| .....CGAGCAAGCUCCGUUUACXXXXXXXX                                     | 7376   | 3.75  |
| .....GAGCAAGCUCCGUUUACXXXXXXXX                                      | 172515 | 87.78 |
| .....AGCAAGCUCCGUUUACACXXXX                                         | 9455   | 4.81  |
| .....GCAAGCUCCGUUUACACGGXX                                          | 3230   | 1.64  |
| .....CAAGCUCCGUUUACACGGXX                                           | 807    | 0.41  |
| .....AAGCUCCGUUUACACGGXX                                            | 1193   | 0.61  |
| .....AGCUCCGUUUACACGGXX                                             | 999    | 0.51  |
| .....GCUCCGUUUACACGGCX                                              | 664    | 0.34  |
| .....CUCCGUUUACACGGCU                                               | 290    | 0.15  |

**#Pri-miR-150/NCCR5**

|                                                                     | Reads  | %     |
|---------------------------------------------------------------------|--------|-------|
| CCUGGGUGUAAACUGAGCUUGCUCGCCUGGGCUCAGAGGGAGCAAGCUCCGUUUACACGCAGGGACC |        |       |
| .CUGGGUGUAAACUGAGCUUGCXXXX                                          | 5      | 0.00  |
| ..UGGGUGUAAACUGAGCUUGCXXXX                                          | 329    | 0.26  |
| ...GGGUGUAAACUGAGCUUGCXXXXXX                                        | 236    | 0.19  |
| ....GGUGUAAACUGAGCUUGCXXXXXXX                                       | 121098 | 96.71 |
| .....GUGUAAACUGAGCUUGCXXXXXX                                        | 698    | 0.56  |
| .....UGUAAACUGAGCUUGCXXXXXX                                         | 903    | 0.72  |
| .....GUAACUGAGCUUGCUCGXXX                                           | 1267   | 1.01  |
| .....UAAACUGAGCUUGCUCGXXXXXX                                        | 268    | 0.21  |
| .....AAACUGAGCUUGCUCGXXX                                            | 272    | 0.22  |
| .....AACUGAGCUUGCUCGX                                               | 106    | 0.08  |
| .....ACUGAGCUUGCUCGX                                                | 24     | 0.02  |
| .....CUGAGCUUGCUCGCCXXXXXX                                          | 12     | 0.01  |
| .....AGCUUGCUCGCCUGGGCU                                             | 2      |       |
| .....GAGCAAGCUCCGUUUAXXXXXXXXXXXXX                                  | 26677  | 95.16 |
| .....AGCAAGCUCCGUUUACACGCXX                                         | 597    | 2.13  |
| .....GCAAGCUCCGUUUACACGCXXXXXXXX                                    | 394    | 1.41  |
| .....CAAGCUCCGUUUACACGCXXXXXXXX                                     | 71     | 0.25  |
| .....AAGCUCCGUUUACACGCXXXXXXXX                                      | 213    | 0.76  |
| .....AGCUCCGUUUACACGCAXXXXXX                                        | 38     | 0.14  |

|                             |    |      |
|-----------------------------|----|------|
| .....GCUCCGUUUACACGCAXXXXXX | 6  | 0.02 |
| .....CUCCGUUUACACGCAGGGACC  | 12 | 0.04 |
| .....UCCGUUUACACGCAGGGAXX   | 16 | 0.06 |
| .....CCGUUUACACGCAGGGACX    | 8  | 0.03 |
| .....CGUUUACACGCAGGGACC     | 3  | 0.01 |

**#sh1005**

|                                                             | Reads   |       |
|-------------------------------------------------------------|---------|-------|
| GUUAGAGCAAGCUCAGUUUACACCUUGUCCGACGGUGUAAACUGAGCUUGCUCUUUUUU | 7       | 0.00  |
| GUUAGAGCAAGCUCAGUUUACA.....                                 | 35      | 0.01  |
| .UUAGAGCAAGCUCAGUUUACAXXX.....                              | 210     | 0.06  |
| ..UAGAGCAAGCUCAGUUUXXXXXX.....                              | 331556  | 97.32 |
| ...AGAGCAAGCUCAGUUXXXXXXXXXXXXXXXXXX.....                   | 5078    | 1.49  |
| ....GAGCAAGCUCAGUUUAXXXXXXXXXXXXXX.....                     | 1262    | 0.37  |
| .....AGCAAGCUCAGUUUACXXXXXXXXXXXXXX.....                    | 1044    | 0.31  |
| .....GCAAGCUCAGUUUACAXXXXXXXXXXXXXX.....                    | 453     | 0.13  |
| .....CAAGCUCAGUUUACACXXXXXXXXXXXXXX.....                    | 1052    | 0.31  |
| .....AAGCUCAGUUUACACXXXXXXXXXXXXXX.....                     | 363     |       |
| .....AGCUCAGUUUACACXXXXXXXXXXXXXX.....                      | 91      |       |
| .....GCUCAGUUUACACCUUXXXXXXXXXXXXX.....                     | 166     |       |
| .....CUCAGUUUACACCUUGXXXXXXXXXXXXX.....                     | 206     |       |
| .....UCAGUUUACACCUUGUXXXXXXXXXXXXX.....                     | 133     |       |
| .....CAGUUUACACCUUGUCCXXXXXXXXXXXXX.....                    | 99      |       |
| .....AGUUUACACCUUGUCCXXXXXXXXXXXXX.....                     | 87      |       |
| .....GUUUACACCUUGUCCGXXXXXXXXXXXXX.....                     | 213     |       |
| .....UUUACACCUUGUCCGAXXXXXXXXXXXXXX.....                    | 124     |       |
| .....UACACCUUGUCCGACXXXXXXXXXXXXX.....                      | 188     |       |
| .....ACACCUUGUCCGACGGXXXXXXXXXXXXX.....                     | 170     |       |
| .....CACCUUGUCCGACGGUXXXXXXXXXXXXX.....                     | 409     |       |
| .....ACCUUGUCCGACGGUGXXXXXXXXXXXXX.....                     | 669     |       |
| .....CCUUGUCCGACGGUGUXXXXXXXXXXXXX.....                     | 783     |       |
| .....CUUGUCCGACGGUGUAXXXXXXXXXXXXXX.....                    | 1017    |       |
| .....UUGUCCGACGGUGUAAXXXXXXXXXXXXXX.....                    | 435     |       |
| .....UGUCCGACGGUGUAAAXXXXXXXXXXXXXX.....                    | 350     |       |
| .....GUCCGACGGUGUAAACXXXXXXXXXXXXX.....                     | 180     |       |
| .....UCCGACGGUGUAAACUXXXXXXXXXXXXX.....                     | 158     |       |
| .....CCGACGGUGUAAACUGXXXXXXXXXXXXX.....                     | 1444    |       |
| .....CGACGGUGUAAACUGAXXXXXXXXXXXXXX.....                    | 891     |       |
| .....GACGGUGUAAACUGAGXXXXXXXXXXXXX.....                     | 1031    |       |
| .....ACGGUGUAAACUGAGCXXXXXXXXXXXXX.....                     | 2203    | 0.16  |
| .....CGGUGUAAACUGAGCUXXXXXXXXXXXXX.....                     | 1846    | 0.14  |
| .....GGUGUAAACUGAGCUUXXXXXXXXXXXXX.....                     | 885     | 0.07  |
| .....GUGUAAACUGAGCUUGXXXXXXXXXXXXX.....                     | 39276   | 2.93  |
| .....UGUAAACUGAGCUUGXXXXXXXXXXXXX.....                      | 1268148 | 94.50 |
| .....GUAAACUGAGCUUGCXXXXXXXXXXXXX.....                      | 17476   | 1.30  |
| .....UAAACUGAGCUUGCUCXXXXXXXXXXXXX.....                     | 4196    | 0.31  |
| .....AAACUGAGCUUGCUCUXXXXXXXXXXXXX.....                     | 4659    | 0.35  |
| .....AACUGAGCUUGCUCUUXXXXXXXXXXXXX.....                     | 1552    | 0.12  |
| .....ACUGAGCUUGCUCUUUXXXXXXXXXXXXX.....                     | 1280    | 0.10  |
| .....CUGAGCUUGCUCUUUXXXXXXXXXXXXX.....                      | 321     | 0.02  |
| .....UGAGCUUGCUCUUUUUXXXXXXXXXXXXX.....                     | 104     | 0.01  |
| .....GAGCUUGCUCUUUUUXXXXXXXXXXXXX.....                      | 4       | 0.00  |

**#Pri-miR-30/WCCR5**

|                                                                      | Reads  |       |
|----------------------------------------------------------------------|--------|-------|
| CGACUGUAAACUGAGCUUGCUCUACUGUGAAGCCACAGAUGGGUAGAGCAAGCACAGUUUACCGCUGC | 3      | 0.00  |
| .GACUGUAAACUGAGCUUGCUCUACU.....                                      | 28     | 0.01  |
| ..ACUGUAAACUGAGCUUGCUCUAXXX.....                                     | 99     | 0.02  |
| ...CUGUAAACUGAGCUUGCUCUACX.....                                      | 486211 | 97.26 |
| ....UGUAAACUGAGCUUGXXXXXXXXXXXXX.....                                |        |       |

|                                         |        |       |
|-----------------------------------------|--------|-------|
| .....GUA AACUGAGCUUGCUCXXXXX.....       | 7738   | 1.55  |
| .....UAAACUGAGCUUGCUCUAXX.....          | 1358   | 0.27  |
| .....AAACUGAGCUUGCUCUXXX.....           | 2065   | 0.41  |
| .....AACUGAGCUUGCUCUACX.....            | 964    | 0.19  |
| .....ACUGAGCUUGCUCUACX.....             | 602    | 0.12  |
| .....CUGAGCUUGCUCUACU.....              | 825    | 0.17  |
| .....UGAGCUUGCUCUACU.....               | 9      | 0.00  |
| .....UUGCUCUACUGUGAAGCCACAGAUGG.....    | 2      |       |
| .....UGCUCUACUGUGAAGCCACAGA.....        | 2      |       |
| .....CUGUGAAGCCACAGAUGGGUA.....         | 3      |       |
| .....GUGAAGCCACAGAUGGGX.....            | 162    |       |
| .....UGAAGCCACAGAUGGGXXXXX.....         | 5      |       |
| .....CAGAUGGGUAGAGCAAGCACAG.....        | 2      |       |
| .....GAUGGGUAGAGCAAGCXXXXXXXXXXXXX..... | 8      |       |
| .....AUGGGUAGAGCAAGCACAGUUUACCGC.....   | 8      |       |
| .....UGGGUAGAGCAAGCACAGUUUACCGC.....    | 8      |       |
| .....GGGUAGAGCAAGCACAGUUUACCGC.....     | 5      |       |
| .....GGUAGAGCAAGCACAGUUUACCGCX.....     | 21     | 0.01  |
| .....GUAGAGCAAGCACAGUUUACCCXX.....      | 60     | 0.03  |
| .....UAGAGCAAGCACAGUXXXXXXXXXXXXX.....  | 213875 | 97.70 |
| .....AGAGCAAGCACAGUUUACCCXX.....        | 3080   | 1.41  |
| .....GAGCAAGCACAGUUUACCGXX.....         | 549    | 0.25  |
| .....AGCAAGCACAGUUUACCCXX.....          | 304    | 0.14  |
| .....GCAAGCACAGUUUACCCXX.....           | 332    | 0.15  |
| .....CAAGCACAGUUUACCGXX.....            | 210    | 0.10  |
| .....AAGCACAGUUUACCGCX.....             | 454    | 0.21  |
| .....AGCACAGUUUACCGCU.....              | 20     | 0.01  |

#### #Pri-miR-150/WCCR5

|                                                                 | Reads  |       |
|-----------------------------------------------------------------|--------|-------|
| CCUGUGUAAACUGAGCUUGCUCUAUGCUGGGCUCAGACCUAGAGCAAGCACAGUUUACCCAGG |        |       |
| .CUGUGUAAACUGAGCUUGCUC.....                                     | 2      | 0.00  |
| .UGUGUAAACUGAGCUUGCUCXXX.....                                   | 398    | 0.28  |
| .GUGUAAACUGAGCUUGCUCUAXX.....                                   | 23     | 0.02  |
| .UGUAAACUGAGCUUGCXXXXXXXXXXXXX.....                             | 137090 | 96.63 |
| .GUA AACUGAGCUUGCUCXXXXXX.....                                  | 2492   | 1.76  |
| .UAAACUGAGCUUGCUCUAUXX.....                                     | 502    | 0.35  |
| .AAACUGAGCUUGCUCUAXX.....                                       | 600    | 0.42  |
| .AACUGAGCUUGCUCUAUX.....                                        | 235    | 0.17  |
| .ACUGAGCUUGCUCUAUX.....                                         | 159    | 0.11  |
| .CUGAGCUUGCUCUAUXX.....                                         | 369    | 0.26  |
| .UGAGCUUGCUCUAUGC.....                                          | 4      | 0.00  |
| .UCUAUGCUGGGCUCAGAC.....                                        | 2      |       |
| .UAUGCUGGGCUCAGACC.....                                         | 2      |       |
| .AUGCUGGGCUCAGACC.....                                          | 2      |       |
| .GGGCUCAGACCUAGAG.....                                          | 2      |       |
| .GACCUAGAGCAAGCACAGUUUACC.....                                  | 2      | 0.00  |
| .CCUAGAGCAAGCACAGUUUACCCA.....                                  | 2      | 0.00  |
| .CUAGAGCAAGCACAGUUUACCCXX.....                                  | 133    | 0.18  |
| .UAGAGCAAGCACAGUXXXXXXXXXXXXX.....                              | 74326  | 98.71 |
| .AGAGCAAGCACAGUUUAXXXX.....                                     | 499    | 0.66  |
| .GAGCAAGCACAGUUUACCCXX.....                                     | 151    | 0.20  |
| .AGCAAGCACAGUUUACCCXX.....                                      | 58     | 0.08  |
| .GCAAGCACAGUUUACCCX.....                                        | 62     | 0.08  |
| .CAAGCACAGUUUACCCX.....                                         | 29     | 0.04  |
| .AAGCACAGUUUACCCA.....                                          | 37     | 0.05  |

#### #cshR-rluc-1

|                                                                    | Reads |      |
|--------------------------------------------------------------------|-------|------|
| GUUAGGUCGUACACCUUGGAAGCCUGUGAAGCCACAGAUGGGGGCUUCAAGGUGUACGACCUUUUU |       |      |
| GUUAGGUCGUACACCUUGGAAGC.....                                       | 2     | 0.00 |

|                                      |        |       |
|--------------------------------------|--------|-------|
| .UUAGGUCGUACACCUUGGAAGCX.....        | 5      | 0.00  |
| .UAGGUCGUACACCUUGGAAGXXX.....        | 73     | 0.06  |
| .AGGUCGUACACCUUGGXXXXXXXXXXXXX.....  | 106982 | 93.10 |
| .GGUCGUACACCUUGGAXXXXXXXXXX.....     | 4538   | 3.95  |
| .GUCGUACACCUUGGAAXXXXXXXXXX.....     | 2305   | 2.01  |
| .UCGUACACCUUGGAAGXXXXXXXXX.....      | 272    | 0.24  |
| .CGUACACCUUGGAAGCXXXXX.....          | 484    | 0.42  |
| .GUACACCUUGGAAGCXXXXXXXXXXXXX.....   | 244    | 0.21  |
| .UACACCUUGGAAGCCXXXXXXXXX.....       | 38     |       |
| .ACACCUUGGAAGCCUXX.....              | 30     |       |
| .CACCUUGGAAGCCUG.....                | 5      |       |
| .ACCUUGGAAGCCUGUGAAGCCAX.....        | 6      |       |
| .CCUUGGAAGCCUGUGXXXXXXXXXXXXX.....   | 13     |       |
| .UUGGAAGCCUGUGAAXXXXXXXXXXXXXX.....  | 31     |       |
| .UGGAAGCCUGUGAAGXXXXXXXXXXXXX.....   | 39     |       |
| .GAAGCCUGUGAAGCCACAGAUGGGG.....      | 2      |       |
| .GCCUGUGAAGCCACAGAXX.....            | 5      |       |
| .CCUGUGAAGCCACAGA.....               | 3      |       |
| .CCUGUGAAGCCACAGAUGGXXXX.....        | 25     |       |
| .CUGUGAAGCCACAGAUGGXXX.....          | 1592   |       |
| .UGUGAAGCCACAGAUGXXXX.....           | 1089   |       |
| .GUGAAGCCACAGAUGGGXX.....            | 32     |       |
| .UGAAGCCACAGAUGGGXX.....             | 10     |       |
| .GAAGCCACAGAUGGGGX.....              | 19     |       |
| .AAGCCACAGAUGGGGGX.....              | 15     |       |
| .CCACAGAUGGGGGCUUCCAAGXXXXXXXXX..... | 8      |       |
| .CACAGAUGGGGGCUUCXXXXXXXXXXXXX.....  | 6      |       |
| .GAUGGGGGCUUCCAAGXXXXXXXXXXXXX.....  | 5      |       |
| .AUGGGGGCUUCCAAGXXXXXXXXXXXXX.....   | 13     |       |
| .UGGGGGCUUCCAAGXXXXXXXXXXXXX.....    | 41     |       |
| .GGGGCUUCCAAGGUGUACGXXXXXXXXX.....   | 18     |       |
| .GGGCUUCCAAGGUGUACGXXXXX.....        | 102    |       |
| .GGGCUUCCAAGGUGUACGACCXXXXX.....     | 41     |       |
| .GGCUUCCAAGGUGUACXXXXXXXXXXXXX.....  | 1537   |       |
| .GCUUCCAAGGUGUACXXXXXXXXXXXXX.....   | 166737 |       |
| .CUUCCAAGGUGUACGXXXXXXXXXXXXX.....   | 298501 |       |
| .UUCCAAGGUGUACGACXXXXXXXXX.....      | 19111  |       |
| .UCCAAGGUGUACGACCXXXXX.....          | 6790   |       |
| .CCAAGGUGUACGACCUXXXX.....           | 2139   |       |
| .CAAGGUGUACGACCUUXXX.....            | 1519   |       |
| .AAGGUGUACGACCUUUXX.....             | 652    |       |
| .AGGUGUACGACCUUUXX.....              | 21     |       |

**#cshR-rluc-20**

|                                                                   | Reads |       |
|-------------------------------------------------------------------|-------|-------|
| GUUAAUGCGUUUGCGUUGCUCGGCUGUGAAGCCACAGAUGGGCCCAGCAACGCAAACGCAUUUUU |       |       |
| GUUAAUGCGUUUGCGUUGCUCGG.....                                      | 3     | 0.00  |
| .UUAUGCGUUUGCGUUGCUCGG.....                                       | 2     | 0.00  |
| .UAAUGCGUUUGCGUUGCUCGGXX.....                                     | 25    | 0.03  |
| .AAUGCGUUUGCGUUGCXXXXXXXXXXXXX.....                               | 70544 | 91.69 |
| .AUGCGUUUGCGUUGCXXXXXXXXX.....                                    | 2986  | 3.88  |
| .UGCGUUUGCGUUGCXXXXXXXXX.....                                     | 1411  | 1.83  |
| .GCGUUUGCGUUGCXXXXXXXXX.....                                      | 1453  | 1.89  |
| .CGUUUGCGUUGCUCGGXXXXXXXXX.....                                   | 181   | 0.24  |
| .GUUUGCGUUGCUCGGXXXXXXXXX.....                                    | 332   | 0.43  |
| .UUUGCGUUGCUCGGCXXXXXXXXX.....                                    | 146   |       |
| .UUGCGUUGCUCGGCXXXXXXXXX.....                                     | 149   |       |
| .UGCUGUUGCUCGGCUG.....                                            | 24    |       |
| .GCGUUGCUCGGCUGUX.....                                            | 8     |       |
| .CGUUGCUCGGCUGUGXXX.....                                          | 15    |       |

|                                            |        |
|--------------------------------------------|--------|
| .....UUGCUCGGGCUGUGAAGXXXX.....            | 22     |
| .....GCUCGGGCUGUGAAGCCA.....               | 3      |
| .....CUCGGGCUGUGAAGCCA.....                | 2      |
| .....CGGGCUGUGAAGCCACXXXX.....             | 8      |
| .....GCUGUGAAGCCACAGAUGGGCXXXXX.....       | 12     |
| .....CUGUGAAGCCACAGAUGGXXXXXXX.....        | 6948   |
| .....UGUGAAGCCACAGAUGGXXXXXXXXXX.....      | 906    |
| .....GUGAAGCCACAGAUGGXXXXXXXXXX.....       | 100    |
| .....UGAAGCCACAGAUGGGXXXXXXXXXX.....       | 46     |
| .....GAAGCCACAGAUGGGCX.....                | 33     |
| .....AAGCCACAGAUGGGCC.....                 | 28     |
| .....AGCCACAGAUGGGCCCGAGCAACG.....         | 4      |
| .....GCCACAGAUGGGCCCGAGCAAC.....           | 2      |
| .....CCACAGAUGGGCCCGAGCAACGXXXXXX.....     | 28     |
| .....CACAGAUGGGCCCGAGXXXXXXXXXXXX.....     | 24     |
| .....ACAGAUGGGCCCGAGCAACGCAAACG.....       | 2      |
| .....CAGAUGGGCCCGAGCAXXXXXXXXXXXXXX.....   | 17     |
| .....AGAUGGGCCCGAGCAACGCAAAXXXXXXXXXX..... | 12     |
| .....GAUGGGCCCGAGCAACGXXXXXXXXXXXXX.....   | 6      |
| .....AUGGGCCCGAGCAACGXXXXXXXXXXXXX.....    | 47     |
| .....UGGGCCCGAGCAACGXXXXXXXXXXXXX.....     | 87     |
| .....GGGCCCGAGCAACGCAAAXXXXXXXXXX.....     | 23     |
| .....GGCCCGAGCAACGCAAAXXXXXXXXXX.....      | 84     |
| .....GCCCGAGCAACGCAAACGXXXXXXXXXX.....     | 270    |
| .....CCCGAGCAACGCAAACGXXXXXXXXXX.....      | 12442  |
| .....CCGAGCAACGCAAACGXXXXXXXXXX.....       | 82345  |
| .....CGAGCAACGCAAACGXXXXXXXXXX.....        | 214963 |
| .....GAGCAACGCAAACGCAXXXXXX.....           | 5141   |
| .....AGCAACGCAAACGCAUXXXX.....             | 605    |
| .....GCAACGCAAACGCAUUXXX.....              | 521    |
| .....CAACGCAAACGCAUUUXX.....               | 565    |
| .....AACGCAAACGCAUUUUX.....                | 1082   |
| .....ACGCAAACGCAUUUUX.....                 | 32     |

**#cshR-rluc-123**

|                                                                    | Reads  |       |
|--------------------------------------------------------------------|--------|-------|
| GUUAAAUCACGGCGUUCUCGGCGUCUGUGAAGCCACAGAUGGGACGCCGAGAACGCCGUGAUUUUU |        |       |
| GUUAAAUCACGGCGUUCUCGGCGUC.....                                     | 2      | 0.00  |
| .UUAAAUCACGGCGUUCUCGGCGUCX.....                                    | 9      | 0.00  |
| .UAAAUCACGGCGUUCUCGGCGXXX.....                                     | 40     | 0.01  |
| ..AAAUCACGGCGUUCXXXXXXXXXXXXXXXXX.....                             | 375790 | 92.52 |
| ...AAUCACGGCGUUCUCGXXXXXXXXXX.....                                 | 13283  | 3.27  |
| ....AUCACGGCGUUCUCGGXXXXXXXXXX.....                                | 5493   | 1.35  |
| .....UCACGGCGUUCUCGGXXXXXXXXXX.....                                | 3849   | 0.95  |
| .....CACGGCGUUCUCGGXXXXXXXXXXXXX.....                              | 6378   | 1.57  |
| .....ACGGCGUUCUCGGGXXXXXXXXXXXXX.....                              | 1312   | 0.32  |
| .....CGGCGUUCUCGGGXXXXXXXXXXXXX.....                               | 626    |       |
| .....GGCGUUCUCGGGUCXXXXXXXXXXXXX.....                              | 19     |       |
| .....GCGUUCUCGGGUCUGXXXXXXXXXXXXX.....                             | 26     |       |
| .....CGUUCUCGGGUCUGXXXXXXXXXXXXX.....                              | 26     |       |
| .....GUUCUCGGGUCUGUGXXXXXXXXXXXXX.....                             | 33     |       |
| .....UUCUCGGGUCUGUGAAGXXXXXXXXXXXXX.....                           | 20     |       |
| .....UCUCGGGUCUGUGAAGXXXXX.....                                    | 17     |       |
| .....CUCGGGUCUGUGAAGXXXXXXXXXXXXX.....                             | 24     |       |
| .....UCGGGUCUGUGAAGCCX.....                                        | 10     |       |
| .....CGGCGUCUGUGAAGCCXXXXXXXXXXXXX.....                            | 15     |       |
| .....GGCGUCUGUGAAGCCACXXXXXXXXXXXXX.....                           | 9      |       |
| .....GCGUCUGUGAAGCCACXXXXXXXXXXXXX.....                            | 30     |       |
| .....CGUCUGUGAAGCCACAGXXXXXXXXXXXXX.....                           | 27     |       |
| .....GUCUGUGAAGCCACAGXXXXXXXXXXXXX.....                            | 38     |       |

|                                          |       |
|------------------------------------------|-------|
| .....UCUGUGAAGCCACAGAUXXXXXXXXXXXXX..... | 519   |
| .....CUGUGAAGCCACAGAUXXXXXXXXXXXXX.....  | 975   |
| .....UGUGAAGCCACAGAUXXXXXXXXXXXXX.....   | 2858  |
| .....GUGAAGCCACAGAUXXXXXXXXXXXXX.....    | 132   |
| .....UGAAGCCACAGAUXXXXXXXXXXXXX.....     | 279   |
| .....GAAGCCACAGAUXXXXXXXXXXXXX.....      | 82    |
| .....AAGCCACAGAUXXXXXXXXXXXXX.....       | 31    |
| .....AGCCACAGAUXXXXXXXXXXXXX.....        | 11    |
| .....GCCACAGAUXXXXXXXXXXXXX.....         | 13    |
| .....CCACAGAUXXXXXXXXXXXXX.....          | 197   |
| .....CACAGAUXXXXXXXXXXXXX.....           | 71    |
| .....ACAGAUXXXXXXXXXXXXX.....            | 29    |
| .....CAGAUXXXXXXXXXXXXX.....             | 92    |
| .....AGAUGGACGCCGAGXXXXXXXXXXXXX.....    | 77    |
| .....GAUGGACGCCGAGXXXXXXXXXXXXX.....     | 17    |
| .....AUGGACGCCGAGXXXXXXXXXXXXX.....      | 90    |
| .....UGGACGCCGAGXXXXXXXXXXXXX.....       | 223   |
| .....GGGACGCCGAGXXXXXXXXXXXXX.....       | 96    |
| .....GGACGCCGAGXXXXXXXXXXXXX.....        | 46    |
| .....GACGCCGAGXXXXXXXXXXXXX.....         | 1457  |
| .....ACGCCGAGXXXXXXXXXXXXX.....          | 7143  |
| .....CGCCGAGXXXXXXXXXXXXX.....           | 98584 |
| .....GCCGAGXXXXXXXXXXXXX.....            | 7328  |
| .....CCGAGXXXXXXXXXXXXX.....             | 847   |
| .....CGAGXXXXXXXXXXXXX.....              | 533   |
| .....GAGXXXXXXXXXXXXX.....               | 448   |
| .....AGAXXXXXXXXXXXXXX.....              | 272   |
| .....GAXXXXXXXXXXXXXX.....               | 44    |

**#cshR-rluc-201**

|                                                            | Reads  |       |
|------------------------------------------------------------|--------|-------|
| GUUAGAUGCAUCUAGCCACGGGCUCUGUGAAGCCACAGAUXXXXXXXXXXXXX..... | 10     | 0.00  |
| ..UAGAUGCAUCUAGCCACGGXXXXX.....                            | 117    | 0.02  |
| ..UAGAUGCAUCUAGCCACGGXXXXX.....                            | 498920 | 96.91 |
| ..AGAUGCAUCUAGCCAXXXXXXXXXXXXXX.....                       | 8239   | 1.60  |
| ...GAUGCAUCUAGCCACGXXXXXXXXXXXXX.....                      | 4710   | 0.91  |
| ...AUGCAUCUAGCCACGGXXXXXXXXXXXXX.....                      | 1181   | 0.23  |
| ...UGCAUCUAGCCACGGGXXXXXXXXXXXXX.....                      | 1113   | 0.22  |
| ...GCAUCUAGCCACGGGCXXXXXXXXXXXXX.....                      | 549    | 0.11  |
| ...CAUCUAGCCACGGGCXXXXXXXXXXXXX.....                       | 654    |       |
| ...AUCUAGCCACGGGCXXXXXXXXXXXXX.....                        | 217    |       |
| ...UCUAGCCACGGGCUCXXXXXXXXXX.....                          | 16     |       |
| ...CUAGCCACGGGCUCXXXXXXXXXX.....                           | 18     |       |
| ...UAGCCACGGGCUCUGXXXXX.....                               | 2      |       |
| ...AGCCACGGGCUCUGUG.....                                   | 3      |       |
| ...GCCACGGGCUCUGUGA.....                                   | 2      |       |
| ...CGGGCUCUGUGAAGCCAC.....                                 | 3      |       |
| ...GCUCUGUGAAGCCACAGAU.....                                | 8      |       |
| ...CUCUGUGAAGCCACAGAXXXXXX.....                            | 2      |       |
| ...UCUGUGAAGCCACAGAU.....                                  | 57     |       |
| ...CUGUGAAGCCACAGAUXXXXXXXXXXXXX.....                      | 955    |       |
| ...UGUGAAGCCACAGAUXXXXXXXXXXXXX.....                       | 330    |       |
| ...GUGAAGCCACAGAUXXXXXXXXXXXXX.....                        | 36     |       |
| ...UGAAGCCACAGAUXXXXXXXXXXXXX.....                         | 5      |       |
| ...GAAGCCACAGAUXXXXXXXXXXXXX.....                          | 2      |       |
| ...ACAGAUXXXXXXXXXXXXX.....                                | 4      |       |
| ...CAGAUXXXXXXXXXXXXX.....                                 | 2      |       |
| ...AGAUGGAGXXXXXXXXXXXXX.....                              |        |       |

**#shR-miR-150 WU3**

| Sequence                                                      | Reads | Count | Ratio |
|---------------------------------------------------------------|-------|-------|-------|
| UUUGGUACAAGGGUUGGGAGAUGCUGUGCCUCAGACCUCUCCCAACCCUUGUACCAUUUUU | 4     | 0.05  |       |
| UUUGGUACAAGGGUUGGGAGAUGX.....                                 | 38    | 0.47  |       |
| .UUGGUACAAGGGUUGGGAXXXXXX.....                                | 139   | 1.73  |       |
| . .UGGUACAAGGGUUGGGXXXXXXX.....                               | 7176  | 89.34 |       |
| . . .GUACAAGGGUUGGGAGAXXXXXXXXXX.....                         | 494   | 6.15  |       |
| . . . .UACAAGGGUUGGGAGAXXXXXXXXXX.....                        | 70    | 0.87  |       |
| . . . . .ACAAGGGUUGGGAGAUXXXXXXXXX.....                       | 80    | 1.00  |       |
| . . . . .CAAGGGUUGGGAGAUXXXXXXXXX.....                        | 31    | 0.39  |       |
| . . . . .AAGGGUUGGGAGAUGCXXXXXXXXX.....                       | 32    |       |       |
| . . . . .AGGGUUGGGAGAUGCXXXXXXXXX.....                        | 7     |       |       |
| . . . . .GGGUUGGGAGAUGCXXXXXXXXX.....                         | 9     |       |       |
| . . . . .GGUUGGGAGAUGCUGUGXXXXXXXXX.....                      | 14    |       |       |
| . . . . .GUUGGGAGAUGCUGUGCCXXXXXXXXX.....                     | 25    |       |       |
| . . . . .UUGGGAGAUGCUGUGCXXXXXXXXX.....                       | 57    |       |       |
| . . . . .UGGGAGAUGCUGUGCCUCXXXXXXXXX.....                     | 26    |       |       |
| . . . . .GGGAGAUGCUGUGCCUCXXXXXXXXX.....                      | 13    |       |       |
| . . . . .GGAGAUGCUGUGCCUCXXXXXXXXX.....                       | 78    |       |       |
| . . . . .GAGAUGCUGUGCCUCXXXXXXXXX.....                        | 171   |       |       |
| . . . . .AGAUGCUGUGCCUCAGXXXXXXXXX.....                       | 110   |       |       |
| . . . . .GAUGCUGUGCCUCAGAXXXXXXXXXX.....                      | 98    |       |       |
| . . . . .AUGCUGUGCCUCAGACXXXXXXXXX.....                       | 118   |       |       |
| . . . . .UGCUGUGCCUCAGACCXXXXXXXXX.....                       | 33    |       |       |
| . . . . .GCUGUGCCUCAGACCXXXXXXXXX.....                        | 70    |       |       |
| . . . . .CUGUGCCUCAGACCUCXXXXXXXXX.....                       | 68    |       |       |
| . . . . .UGUGCCUCAGACCUCXXXXXXXXX.....                        | 92    |       |       |
| . . . . .GUGCCUCAGACCUCXXXXXXXXX.....                         | 57    |       |       |
| . . . . .UGCCUCAGACCUCXXXXXXXXX.....                          | 94    |       |       |
| . . . . .GCCUCAGACCUCXXXXXXXXX.....                           | 50    |       |       |
| . . . . .CCUCAGACCUCXXXXXXXXXXXXX.....                        | 116   |       |       |
| . . . . .CUCAGACCUCXXXXAAXXXXXXXXXX.....                      | 1084  |       |       |
| . . . . .UCAGACCUCXXXXAACXXXXXXXXX.....                       | 886   |       |       |
| . . . . .CAGACCUCXXXXAACXXXXXXXXX.....                        | 1265  |       |       |
| . . . . .AGACCUCXXXXAACCCXXXXXXXXX.....                       | 604   |       |       |
| . . . . .GACCUCXXXXAACCCUXXXXXXXXX.....                       | 308   |       |       |
| . . . . .ACCUCXXXXAACCCUXXXXXXXXX.....                        | 425   |       |       |
| . . . . .CCUCXXXXAACCCUUGXXXXXXXXX.....                       | 797   |       |       |
| . . . . .CUCXXXXAACCCUUGUXXXXXXXXX.....                       | 7655  |       |       |
| . . . . .UCXXXXAACCCUUGUAXXXXXXXXXX.....                      | 60518 |       |       |
| . . . . .CUXXXXAACCCUUGUACXXXXXXXXX.....                      | 1573  |       |       |
| . . . . .UCCCAACCCUUGUACXXXXXXXXX.....                        | 764   |       |       |
| . . . . .CCCAACCCUUGUACAXXXX.....                             | 329   |       |       |
| . . . . .CCAACCCUUGUACCAUXXX.....                             | 256   |       |       |
| . . . . .CAACCCUUGUACCAUXXX.....                              | 284   |       |       |
| . . . . .AACCCUUGUACCAUXXX.....                               | 270   |       |       |
| . . . . .ACCCUUGUACCAUXXX.....                                | 7     |       |       |

**#shR-miR-122**

| Sequence                                                         | Reads  | Count | Ratio |
|------------------------------------------------------------------|--------|-------|-------|
| UUAUGGAGUGUGACAAUGGUGUUUGUGUCUAAACUAUCAAACACCAUUGUCACACUCCAUUUUU | 38     | 0.02  |       |
| UUAUGGAGUGUGACAAUGGUGUUX.....                                    | 28     | 0.01  |       |
| .UUAUGGAGUGUGACAAUGGUGUUX.....                                   | 187533 | 96.24 |       |
| . .AUGGAGUGUGACAAUXXXXXXXXX.....                                 | 2389   | 1.23  |       |
| . . .UGGAGUGUGACAAUGGXXXXXXXXX.....                              | 4330   | 2.22  |       |
| . . . .GGAGUGUGACAAUGGXXXXXXXXX.....                             | 328    | 0.17  |       |
| . . . . .GAGUGUGACAAUGGUGXXXXXXXXX.....                          | 124    | 0.06  |       |
| . . . . .AGUGUGACAAUGGUGUXXXXXXXXX.....                          | 98     | 0.05  |       |
| . . . . .GUGUGACAAUGGUGUUXXXXXXXXX.....                          | 68     |       |       |
| . . . . .UGUGACAAUGGUGUUXXXXXXXXX.....                           | 13     |       |       |
| . . . . .GUGACAAUGGUGUUXXXXX.....                                |        |       |       |

|                                          |        |
|------------------------------------------|--------|
| .....UGACAAUGGUGUUUGUGUCUAAAXXXX.....    | 4      |
| .....GACAAUGGUGUUUGUGXXXXXXXXXXXX.....   | 10     |
| .....ACAAUGGUGUUUGUGUCUAAAXXXX.....      | 8      |
| .....CAAUGGUGUUUGUGUCXXXXXXXXXXXX.....   | 12     |
| .....AAUGGUGUUUGUGUCXXXXXXXXXXXX.....    | 27     |
| .....AUGGUGUUUGUGUCUAXXXXXXXXXXXXX.....  | 24     |
| .....UGGUGUUUGUGUCUAAAXXXXXXXXXXXXX..... | 31     |
| .....GGUGUUUGUGUCUAAAXXXXXXXXXXXXX.....  | 34     |
| .....GUGUUUGUGUCUAAACXXXXXXXXXXXX.....   | 110    |
| .....UGUUUGUGUCUAAACUXXXXXXXXXXXX.....   | 71     |
| .....GUUUGUGUCUAAACUAUXXXXXXXXXXXX.....  | 99     |
| .....UUUGUGUCUAAACUAUXXXXXXXXXXXX.....   | 294    |
| .....UUGUGUCUAAACUAUCXXXXXXXXXXXX.....   | 190    |
| .....UGUGUCUAAACUAUCAXXXXXXXXXXXXX.....  | 1436   |
| .....GUGUCUAAACUAUCAAXXXXXXXXXXXXX.....  | 208    |
| .....UGUCUAAACUAUCAAXXXXXXXXXXXXX.....   | 201    |
| .....GUCUAAACUAUCAAACXXXXXXXXXXXX.....   | 58     |
| .....UCUAAACUAUCAAACAXXXXXXXXXXXXX.....  | 56     |
| .....CUAAACUAUCAAACACXXXXXXXXXXXX.....   | 57     |
| .....UAAACUAUCAAACACXXXXXXXXXXXX.....    | 39     |
| .....AAACUAUCAAACACCAUXXXXXXXXXXXX.....  | 51     |
| .....AACUAUCAAACACCAUXXXXXXXXXXXX.....   | 77     |
| .....ACUAUCAAACACCAUXXXXXXXXXXXX.....    | 218    |
| .....CUAUCAAACACCAUUGXXXXXXXXXXXX.....   | 3803   |
| .....UAUCAAACACCAUUGUXXXXXXXXXXXX.....   | 20260  |
| .....AUCAAACACCAUUGUCAXXXXXXXXXXXXX..... | 6583   |
| .....UCAAACACCAUUGUCACXXXXXXXXXXXX.....  | 1467   |
| .....CAAACACCAUUGUCACXXXXXXXXXXXX.....   | 713    |
| .....AAACACCAUUGUCACAXXXXXXXXXXXXX.....  | 3664   |
| .....AACACCAUUGUCACACXXXXXXXXXXXX.....   | 105231 |
| .....ACACCAUUGUCACACXXXXXXXXXXXX.....    | 159742 |
| .....CACCAUUGUCACACUCXXXXXXXXXXXX.....   | 53028  |
| .....ACCAUUGUCACACUCCXXXXXXXXXXXX.....   | 5426   |
| .....CCAUUGUCACACUCCAXXXXX.....          | 950    |
| .....CAUUGUCACACUCCAUXXXXX.....          | 2322   |
| .....AUUGUCACACUCCAUXXXX.....            | 4508   |
| .....UUGUCACACUCCAUUXXX.....             | 631    |
| .....UGUCACACUCCAUUUXX.....              | 74     |
| .....GUCACACUCCAUUUU.....                | 12     |

**#shR-CCR5Chen5**

|                                                                    | Reads |       |
|--------------------------------------------------------------------|-------|-------|
| UUUGGUGUAAACUGAGCUUGCUCUGUGAAGCCACAGAUGGGGAGCAAGCUCAGUUUACACCUUUUU |       |       |
| UUUGGUGUAAACUGAGCUUGCUC.....                                       | 3     | 0.01  |
| .UUGGUGUAAACUGAGCUUGCUX.....                                       | 23    | 0.04  |
| .UGGUGUAAACUGAGCUUXXXXXX.....                                      | 506   | 0.88  |
| ..GGUGUAAACUGAGCUXXXXXXXXXXXX.....                                 | 56516 | 98.11 |
| ...GUGUAAACUGAGCUUGXXXXXXXXXXXX.....                               | 129   | 0.22  |
| ....UGUAAACUGAGCUUGCXXXXXXXXXXXX.....                              | 124   | 0.22  |
| .....GUAAACUGAGCUUGCXXXXXXXXXXXX.....                              | 221   | 0.38  |
| .....UAAACUGAGCUUGCXXXXXXXXXXXX.....                               | 82    | 0.14  |
| .....AAACUGAGCUUGCUCXXXX.....                                      | 55    |       |
| .....AACUGAGCUUGCUCUXXXXXX.....                                    | 18    |       |
| .....ACUGAGCUUGCUCUXXXXXX.....                                     | 26    |       |
| .....CUGAGCUUGCUCUGUXXXXXX.....                                    | 63    |       |
| .....UGAGCUUGCUCUGUGXXXXXX.....                                    | 47    |       |
| .....GAGCUUGCUCUGUGAAXXX.....                                      | 8     |       |
| .....AGCUUGCUCUGUGAAGXXXX.....                                     | 44    |       |
| .....GCUUGCUCUGUGAAGCXXX.....                                      | 4     |       |
| .....CUUGCUCUGUGAAGCCACAGA.....                                    | 6     |       |



|                                             |        |
|---------------------------------------------|--------|
| .....UUGCUCUGUGAAGCCXXXXXXXXXX.....         | 11     |
| .....UGCUCUGUGAAGCCACXXXXXXXXXX.....        | 4      |
| .....GCUCUGUGAAGCCACAGAUGXX.....            | 4      |
| .....CUCCUGUGAAGCCACAGXXXXXXXXXX.....       | 24     |
| .....UCCUGUGAAGCCACAGXXXXXXXXXX.....        | 13     |
| .....CCUGUGAAGCCACAGXXXXXXXXXXXXXX.....     | 35     |
| .....CUGUGAAGCCACAGAUGXXXXXX.....           | 40     |
| .....UGUGAAGCCACAGAUGGXXXXXXXXXX.....       | 941    |
| .....GUGAAGCCACAGAUGGXXXXXXXXXX.....        | 46     |
| .....UGAAGCCACAGAUGGGXXXXXXXXXX.....        | 22     |
| .....GAAGCCACAGAUGGGGXXXX.....              | 14     |
| .....AAGCCACAGAUGGGGAXXXXX.....             | 5      |
| .....AGCCACAGAUGGGGAGCAA.....               | 2      |
| .....CCACAGAUGGGGAGCAAGCXXXXXXXXXX.....     | 10     |
| .....CACAGAUGGGGAGCAAGXXXXXXXXXXXXXX.....   | 25     |
| .....ACAGAUGGGGAGCAAGCUCAGXXXXXXXXXX.....   | 12     |
| .....CAGAUGGGGAGCAAGCXXXXXXXXXXXXXX.....    | 35     |
| .....AGAUGGGGAGCAAGCUCAGXXXXXXXXXXXXXX..... | 28     |
| .....GAUGGGGAGCAAGCUCAGXXXXXXXXXXXXXX.....  | 49     |
| .....AUGGGGAGCAAGCUCAXXXXXXXXXXXXXXX.....   | 306    |
| .....UGGGGAGCAAGCUCAGXXXXXXXXXXXXXX.....    | 531    |
| .....GGGGAGCAAGCUCAGXXXXXXXXXXXXXX.....     | 605    |
| .....GGGAGCAAGCUCAGUXXXXXXXXXXXXXX.....     | 1575   |
| .....GGAGCAAGCUCAGUUAXXXXXXXXXXXXXXX.....   | 194    |
| .....GAGCAAGCUCAGUUAXXXXXXXXXXXXXXX.....    | 8471   |
| .....AGCAAGCUCAGUUAXXXXXXXXXXXXXXX.....     | 224095 |
| .....GCAAGCUCAGUUACAXXXXXXXXXXXXXXX.....    | 5223   |
| .....CAAGCUCAGUUACACXXXXXXXXXXXXXX.....     | 1483   |
| .....AAGCUCAGUUACACCXXXXXX.....             | 2509   |
| .....AGCUCAGUUACACCUXXXX.....               | 524    |
| .....GCUCAGUUACACCUUXXXX.....               | 367    |
| .....CUCAGUUACACCUUUXX.....                 | 504    |
| .....UCAGUUACACCUUUUX.....                  | 228    |
| .....CAGUUACACCUUUUU.....                   | 14     |

**#sh1005-T**

|                                                       | Reads |       |
|-------------------------------------------------------|-------|-------|
| UGAGCAAGCUCAGUUACACCUUGUCCGACGGUGUAAACUGAGCUCUUCUUUUU | 52    | 3.01  |
| UGAGCAAGCUCAGUUACACXX.....                            | 1407  | 81.52 |
| .GAGCAAGCUCAGUUACXXXXXXXXXX.....                      | 30    | 1.74  |
| ..AGCAAGCUCAGUUACACXXXXXXXXXX.....                    | 207   | 11.99 |
| ...GCAAGCUCAGUUACAXXXXXXXXXXX.....                    | 10    | 0.58  |
| ....CAAGCUCAGUUACACCXXXX.....                         | 20    | 1.16  |
| .....AAGCUCAGUUACACCXXXX.....                         | 8     |       |
| .....AGCUCAGUUACACCUUGU.....                          | 2     |       |
| .....CAGUUACACCUUGUCCG.....                           | 3     |       |
| .....UUACACCUUGUCCGACGGUGU.....                       | 7     |       |
| .....CCUUGUCCGACGGUGUAAACUGAGX.....                   | 2     |       |
| .....CUUGUCCGACGGUGUAAACUG.....                       | 4     |       |
| .....UUGUCCGACGGUGUAAAXXXXX.....                      | 9     |       |
| .....UGUCCGACGGUGUAAACUGAGCXXXXXXXXXX.....            | 3     |       |
| .....GUCCGACGGUGUAAACUGAGCUCU.....                    | 20    |       |
| .....UCCGACGGUGUAAACUGAGCUXXXXXXXXXXX.....            | 116   |       |
| .....CCGACGGUGUAAACUGXXXXXXXXXXXXXX.....              | 72    |       |
| .....CGACGGUGUAAACUGAXXXXXXXXXXXXXXX.....             | 92    |       |
| .....GACGGUGUAAACUGAGXXXXXXXXXXXXXX.....              | 264   |       |
| .....ACGGUGUAAACUGAGCUUXXXXXXXXXXXXXX.....            | 90    |       |
| .....CGGUGUAAACUGAGCUUGCXXXXXX.....                   | 30    |       |
| .....GGUGUAAACUGAGCUUGCXXXXXX.....                    | 53    |       |
| .....GUGUAAACUGAGCUUGCXXXXXX.....                     |       |       |

|                             |      |
|-----------------------------|------|
| .....UGUAAACUGAGCUUGCXXXXXX | 5298 |
| .....GUAAACUGAGCUUGCUCXXXX  | 179  |
| .....UAAACUGAGCUUGCUCUXXX.  | 27   |
| .....AAACUGAGCUUGCUCUXXX.   | 26   |
| .....AACUGAGCUUGCUCUXXX.    | 17   |
| .....ACUGAGCUUGCUCUUU..     | 8    |
| .....CUGAGCUUGCUCUUUU.      | 6    |

**#sh1005-G**

|                                                         | Reads |       |
|---------------------------------------------------------|-------|-------|
| GGAGCAAGCUCAGUUUACACCUUGUCCGACGGUGUAAACUGAGCUUGCUCUUUUU | 2800  | 88.36 |
| GGAGCAAGCUCAGUUUXXXXXXXXXXXXX.....                      | 214   | 6.75  |
| .GAGCAAGCUCAGUUUACAXXXXXXXXXXX.....                     | 63    | 1.99  |
| ..AGCAAGCUCAGUUUACAXXXXXXXXXXX.....                     | 51    | 1.61  |
| ...GCAAGCUCAGUUUACACXXXX.....                           | 13    | 0.41  |
| ....CAAGCUCAGUUUACACCCXXX.....                          | 28    | 0.88  |
| .....AAGCUCAGUUUACACCCXXX.....                          | 16    |       |
| .....AGCUCAGUUUACACCUUGU.....                           | 3     |       |
| .....GCUCAGUUUACACCUUGUCCGACG.....                      | 5     |       |
| .....UCAGUUUACACCUUGUCCGXXXX.....                       | 9     |       |
| .....UACACCUUGUCCGACGGUGU.....                          | 2     |       |
| .....CACCUUGUCCGACGGUGUAAACUGAGC.....                   | 4     |       |
| .....ACCUUGUCCGACGGUGUAAACUGAGCU.....                   | 2     |       |
| .....CCUUGUCCGACGGUGUAAACUGAGCU.....                    | 8     |       |
| .....UUGUCCGACGGUGUAAAXXXXXXXXXX.....                   | 5     |       |
| .....UGUCCGACGGUGUAAAXXX.....                           | 8     |       |
| .....GUCCGACGGUGUAAACUGAGCXXXXXXXX.....                 | 22    |       |
| .....UCCGACGGUGUAAACUGAGCXXXXXXXX.....                  | 74    |       |
| .....CCGACGGUGUAAACUGXXXXXXXXXXXXX.....                 | 77    |       |
| .....CGACGGUGUAAACUGAXXXXXXXXXXXXXX.....                | 114   |       |
| .....GACGGUGUAAACUGAGXXXXXXXXXXXXX.....                 | 230   |       |
| .....ACGGUGUAAACUGAGCXXXXXXXXXXXXX.....                 | 105   |       |
| .....CGGUGUAAACUGAGCUUGCXXXXXX.....                     | 36    |       |
| .....GGUGUAAACUGAGCUUGCXXXXXX.....                      | 40    |       |
| .....GUGUAAACUGAGCUUGCUCXXXXX.....                      | 6107  |       |
| .....UGUAAACUGAGCUUGCXXXXXX.....                        | 209   |       |
| .....GUAAACUGAGCUUGCXXXXXX.....                         | 27    |       |
| .....UAAACUGAGCUUGCUCXXXXX.....                         | 50    |       |
| .....AAACUGAGCUUGCUCUXXX.....                           | 20    |       |
| .....AACUGAGCUUGCUCUXXX.....                            | 14    |       |
| .....ACUGAGCUUGCUCUXXX.....                             | 33    |       |
| .....CUGAGCUUGCUCUXXX.....                              | 4     |       |
| .....UGAGCUUGCUCUXXX.....                               |       |       |

**#sh1005-C**

|                                                         | Reads |       |
|---------------------------------------------------------|-------|-------|
| CGAGCAAGCUCAGUUUACACCUUGUCCGACGGUGUAAACUGAGCUUGCUCUUUUU | 272   | 13.17 |
| CGAGCAAGCUCAGUUUAXXXXXX.....                            | 1644  | 79.61 |
| .GAGCAAGCUCAGUUUAXXXXXXXXXXXXXX.....                    | 37    | 1.79  |
| ..AGCAAGCUCAGUUUACAXXXXXX.....                          | 73    | 3.54  |
| ...GCAAGCUCAGUUUACACXXXXXX.....                         | 10    | 0.48  |
| ....CAAGCUCAGUUUACACCC.....                             | 29    | 1.40  |
| .....AAGCUCAGUUUACACCCXXX.....                          | 4     |       |
| .....AGCUCAGUUUACACCUXXX.....                           | 2     |       |
| .....GCUCAGUUUACACCUUGUC.....                           | 3     |       |
| .....UCAGUUUACACCUUGUCCGACGG.....                       | 2     |       |
| .....UACACCUUGUCCGACGGUGU.....                          | 2     |       |
| .....ACCUUGUCCGACGGUGUAAACUGAGC.....                    | 2     |       |
| .....CUUGUCCGACGGUGUA.....                              | 2     |       |
| .....UUGUCCGACGGUGUAAAXXXXXXXXXX.....                   | 6     |       |
| .....UGUCCGACGGUGUAAACUGA.....                          | 2     |       |

|                                         |      |
|-----------------------------------------|------|
| .....GUCCGACGGUGUAAACUGAGCUUGXXXX....   | 5    |
| .....UCCGACGGUGUAAACUGAXXXXXXXXXXX....  | 24   |
| .....CCGACGGUGUAAACUGXXXXXXXXXXXXXX.... | 88   |
| .....CGACGGUGUAAACUGAXXXXXXXXXXXXXX.... | 51   |
| .....GACGGUGUAAACUGAGCUUGCUCXXXX....    | 55   |
| .....ACGGUGUAAACUGAGCXXXXXXXXXXXXXX.... | 229  |
| .....CGGUGUAAACUGAGCUUGCUCXXXX....      | 48   |
| .....GGUGUAAACUGAGCUUGCUCXXXX....       | 32   |
| .....GUGUAAACUGAGCUUGCXXXX....          | 79   |
| .....UGUAAACUGAGCUUGCXXXXXXXX....       | 7249 |
| .....GUAAACUGAGCUUGCUCXXXX....          | 196  |
| .....UAAACUGAGCUUGCUCXXXX....           | 36   |
| .....AAACUGAGCUUGCUCXXXX....            | 41   |
| .....AACUGAGCUUGCUCUUX....              | 19   |
| .....ACUGAGCUUGCUCUUU....               | 10   |
| .....CUGAGCUUGCUCUUUU....               | 2    |

**#sh1005-TT**

|                                                          |       |       |
|----------------------------------------------------------|-------|-------|
| UUGAGCAAGCUCAGUUUACACCUUGUCCGACGGUGUAAACUGAGCUUGCUCUUUUU | Reads |       |
| UUGAGCAAGCUCAGUUUACACC.....                              | 7     | 0.59  |
| .UGAGCAAGCUCAGUUUACACXXX.....                            | 44    | 3.68  |
| ..GAGCAAGCUCAGUUUAXXXXXXXXXXXXXX.....                    | 1097  | 91.72 |
| ...AGCAAGCUCAGUUUACACCXXXX.....                          | 16    | 1.34  |
| ....GCAAGCUCAGUUUACAXXXXXXXXXXXXXX.....                  | 32    | 2.68  |
| .....AAGCUCAGUUUACACCX.....                              | 17    |       |
| .....AGCUCAGUUUACACCU.....                               | 3     |       |
| .....UACACCUUGUCCGACGGUGU.....                           | 3     |       |
| .....CCUUGUCCGACGGUGUAAACXXXX.....                       | 4     |       |
| .....CUUGUCCGACGGUGUAAA.....                             | 3     |       |
| .....UUGUCCGACGGUGUAAACUGAGXXXXX.....                    | 6     |       |
| .....UGUCCGACGGUGUAAACUGAGCUUGCUC.....                   | 2     |       |
| .....GUCCGACGGUGUAAACUGAGCUUGCUCU.....                   | 2     |       |
| .....UCCGACGGUGUAAACUGAGCXXXXXXXXXXXXX.....              | 4     |       |
| .....CCGACGGUGUAAACUGXXXXXXXXXXXXXX.....                 | 59    |       |
| .....CGACGGUGUAAACUGAGXXXXXXXXXXXXXX.....                | 28    |       |
| .....GACGGUGUAAACUGAGCUUGCXXXXXXXXXXXXX.....             | 50    |       |
| .....ACGGUGUAAACUGAGCUUGCXXXXXXXXXXXXX.....              | 127   |       |
| .....CGGUGUAAACUGAGCUUGCUCXX....                         | 33    |       |
| .....GGUGUAAACUGAGCUUGCUCUXX....                         | 18    |       |
| .....GUGUAAACUGAGCUUGCUCUXX....                          | 45    |       |
| .....UGUAAACUGAGCUUGCXXXXXXXXXXXXX.....                  | 6270  |       |
| .....GUAAACUGAGCUUGCUCXXXXXXXXXXXXX.....                 | 156   |       |
| .....UAAACUGAGCUUGCUCUXXXX....                           | 21    |       |
| .....AAACUGAGCUUGCUCUXX....                              | 16    |       |
| .....AACUGAGCUUGCUCUUU....                               | 6     |       |
| .....ACUGAGCUUGCUCUUU....                                | 9     |       |
| .....CUGAGCUUGCUCUUUU....                                | 5     |       |

**#sh1005-TTT**

|                                                           |       |       |
|-----------------------------------------------------------|-------|-------|
| UUUGAGCAAGCUCAGUUUACACCUUGUCCGACGGUGUAAACUGAGCUUGCUCUUUUU | Reads |       |
| .UUGAGCAAGCUCAGUUUACACC.....                              | 19    | 1.89  |
| ..UGAGCAAGCUCAGUUUACACXX.....                             | 91    | 9.05  |
| ...GAGCAAGCUCAGUUUAXXXXXXXXXXXXXX.....                    | 848   | 84.29 |
| ....AGCAAGCUCAGUUUACACC.....                              | 5     | 0.50  |
| .....GCAAGCUCAGUUUACACXXXXXXXXXXXXX.....                  | 43    | 4.27  |
| .....CAAGCUCAGUUUACACCX.....                              | 5     |       |
| .....AAGCUCAGUUUACACCX.....                               | 7     |       |
| .....GUCCGACGGUGUAAACUGAGCUUGCUCU.....                    | 2     |       |
| .....UCCGACGGUGUAAACUGAGCUUGCUCU.....                     | 2     |       |
| .....CCGACGGUGUAAACUGAGXXXXXXXXXXXXX.....                 | 18    |       |

|                                    |      |
|------------------------------------|------|
| .....CGACGGUGUAAACUGAGXXXXXXXXXX.. | 7    |
| .....GACGGUGUAAACUGAGCUUGCUCUXXX.  | 19   |
| .....ACGGUGUAAACUGAGCUUGCUCUXXX..  | 24   |
| .....CGGUGUAAACUGAGCUUGCUCUXXX..   | 16   |
| .....GGUGUAAACUGAGCUUGCUCUXXX..    | 13   |
| .....GUGUAAACUGAGCUUGCUCUUX..      | 40   |
| .....UGUAAACUGAGCUUGCXXXXXXXXXX    | 3347 |
| .....GUAAACUGAGCUUGCUCUXXX..       | 102  |
| .....UAAACUGAGCUUGCUCUUUX..        | 17   |
| .....AAACUGAGCUUGCUCUXXX..         | 33   |
| .....AACUGAGCUUGCUCUUU..           | 5    |
| .....ACUGAGCUUGCUCUUU..            | 6    |

**#sh1005-TTTT**

|                                                            |       |       |
|------------------------------------------------------------|-------|-------|
| UUUUGAGCAAGCUCAGUUUACACCUUGUCCGACGGUGUAAACUGAGCUUGCUCUUUUU | Reads |       |
| UUUUGAGCAAGCUCAGUUUACAC.....                               | 2     | 0.38  |
| .UUUGAGCAAGCUCAGUUUACACC.....                              | 5     | 0.94  |
| . .UUGAGCAAGCUCAGUUUACACX.....                             | 8     | 1.51  |
| . . .UGAGCAAGCUCAGUUUACACXX.....                           | 17    | 3.20  |
| . . . .GAGCAAGCUCAGUUUACXXXXXXXXX.....                     | 496   | 93.41 |
| . . . . .AGCAAGCUCAGUUUACACC.....                          | 3     | 0.56  |
| . . . . .GCAAGCUCAGUUUACACC.....                           | 11    |       |
| . . . . .CAAGCUCAGUUUACACCX.....                           | 11    |       |
| . . . . .AAGCUCAGUUUACACC.....                             | 7     |       |
| . . . . . .UGUCCGACGGUGUAAACUGAGCUUGC.....                 | 2     |       |
| . . . . . . .CCGACGGUGUAAACUGXXXXXXXXXXXXX.....            | 7     |       |
| . . . . . . .CGGUGUAAACUGAGCUUGCUC.....                    | 3     |       |
| . . . . . . . .GGUGUAAACUGAGCUUGCUCUUUU.....               | 2     |       |
| . . . . . . . . .GUGUAAACUGAGCUUGCUCUUX..                  | 32    |       |
| . . . . . . . . . .UGUAAACUGAGCUUGCXXXXXXXXXX              | 2873  |       |
| . . . . . . . . . . .GUAAACUGAGCUUGCUCUXXX..               | 96    |       |
| . . . . . . . . . . . .UAAACUGAGCUUGCUCUUX..               | 15    |       |
| . . . . . . . . . . . . .AAACUGAGCUUGCUCUUX..              | 14    |       |
| . . . . . . . . . . . . . .AACUGAGCUUGCUCUUU..             | 7     |       |
| . . . . . . . . . . . . . . .ACUGAGCUUGCUCUUU..            | 10    |       |
| . . . . . . . . . . . . . . . .CUGAGCUUGCUCUUUU..          | 4     |       |

**#sh1005-TA**

|                                                                        |       |       |
|------------------------------------------------------------------------|-------|-------|
| UAGAGCAAGCUCAGUUUACACCUUGUCCGACGGUGUAAACUGAGCUUGCUCUUUUU               | Reads |       |
| UAGAGCAAGCUCAGUUUACACX.....                                            | 40    | 0.35  |
| .AGAGCAAGCUCAGUUUXXXXXXXXXXXXX.....                                    | 10952 | 96.96 |
| . .GAGCAAGCUCAGUUUACXXXXXXXXX.....                                     | 184   | 1.63  |
| . . .AGCAAGCUCAGUUUACACX.....                                          | 50    | 0.44  |
| . . . .GCAAGCUCAGUUUACACXXXXX.....                                     | 43    | 0.38  |
| . . . . .CAAGCUCAGUUUACACXXXXX.....                                    | 26    | 0.23  |
| . . . . . .AAGCUCAGUUUACACCXXXXX.....                                  | 46    |       |
| . . . . . . .AGCUCAGUUUACACCUUGU.....                                  | 3     |       |
| . . . . . . . .GCUCAGUUUACACCUUGUC.....                                | 4     |       |
| . . . . . . . . .UACACCUUGUCCGACGGUGU.....                             | 2     |       |
| . . . . . . . . . .ACACCUUGUCCGACGGU.....                              | 2     |       |
| . . . . . . . . . . .CACCUUGUCCGACGGUGUAAACUGAGC.....                  | 2     |       |
| . . . . . . . . . . . .CCUUGUCCGACGGUGUAAACUGAGCUU.....                | 2     |       |
| . . . . . . . . . . . . .CUUGUCCGACGGUGUAAACUGA.....                   | 2     |       |
| . . . . . . . . . . . . . .UUGUCCGACGGUGUAAACXXXXXXXXXX.....           | 7     |       |
| . . . . . . . . . . . . . . .UGUCCGACGGUGUAAACUGAGCUUGCUX.....         | 9     |       |
| . . . . . . . . . . . . . . . .GUCCGACGGUGUAAACUGAGCUXXXXXXXXX.....    | 4     |       |
| . . . . . . . . . . . . . . . . .UCCGACGGUGUAAACUGXXXXXXXXXXXXX.....   | 7     |       |
| . . . . . . . . . . . . . . . . . .CCGACGGUGUAAACUGXXXXXXXXXXXXX.....  | 74    |       |
| . . . . . . . . . . . . . . . . . . .CGACGGUGUAAACUGXXXXXXXXXXXXX..... | 89    |       |

|                                   |       |
|-----------------------------------|-------|
| .....GACGGUGUAAACUGAGCUUGCUCXXXX. | 80    |
| .....ACGGUGUAAACUGAGCUUGCXXXXXX.  | 97    |
| .....CGGUGUAAACUGAGCUUGCXXXXXX.   | 46    |
| .....GGUGUAAACUGAGCUUGCUCXXXX.    | 27    |
| .....GUGUAAACUGAGCUUGCXXXXXX.     | 603   |
| .....UGUAAACUGAGCUUGCXXXXXX.      | 15784 |
| .....GUAAACUGAGCUUGCUCXXXX.       | 252   |
| .....UAAACUGAGCUUGCUCUUXX.        | 38    |
| .....AAACUGAGCUUGCUCUXXX.         | 37    |
| .....AACUGAGCUUGCUCUUXX.          | 17    |
| .....ACUGAGCUUGCUCUUU.            | 3     |

**#sh1005-TTA**

|                                                           |       |       |
|-----------------------------------------------------------|-------|-------|
| UUAGAGCAAGCUCAGUUUACACCUUGUCCGACGGUGUAAACUGAGCUUGCUCUUUUU | Reads |       |
| .UAGAGCAAGCUCAGUUUACACC.....                              | 9     | 0.15  |
| .AGAGCAAGCUCAGUUUXXXXXXXXXX.                              | 5767  | 97.37 |
| .GAGCAAGCUCAGUUUACACXX.....                               | 80    | 1.35  |
| .AGCAAGCUCAGUUUACACCX.....                                | 51    | 0.86  |
| .GCAAGCUCAGUUUACACX.....                                  | 16    | 0.27  |
| .CAAGCUCAGUUUACACXXXX.                                    | 12    |       |
| .AAGCUCAGUUUACACCX.....                                   | 27    |       |
| .AGCUCAGUUUACACCUUGU.....                                 | 2     |       |
| .UACACCUUGUCCGACGGUGU.....                                | 3     |       |
| .CUUGUCCGACGGUGUAAA.....                                  | 2     |       |
| .UUGUCCGACGGUGUAAAXXXXX.                                  | 5     |       |
| .UCCGACGGUGUAAACUGAGCUUGCUCXXX.                           | 6     |       |
| .CCGACGGUGUAAACUGXXXXXXX.                                 | 34    |       |
| .CGACGGUGUAAACUGAGXXXXXXX.                                | 52    |       |
| .GACGGUGUAAACUGAGCUUGCUCXXXX.                             | 60    |       |
| .ACGGUGUAAACUGAGCUUGCUCXXXX.                              | 52    |       |
| .CGGUGUAAACUGAGCUUGCUCUXX.                                | 16    |       |
| .GGUGUAAACUGAGCUUGCUCUXX.                                 | 10    |       |
| .GUGUAAACUGAGCUUGCUCXXXX.                                 | 281   |       |
| .UGUAAACUGAGCUUGCUCXXXX.                                  | 7264  |       |
| .GUAAACUGAGCUUGCUCXXXX.                                   | 151   |       |
| .UAAACUGAGCUUGCUCUUXX.                                    | 30    |       |
| .AAACUGAGCUUGCUCUXXX.                                     | 38    |       |
| .AACUGAGCUUGCUCUUU.                                       | 4     |       |
| .ACUGAGCUUGCUCUUU.                                        | 5     |       |
| .CUGAGCUUGCUCUUU.                                         | 8     |       |

**#sh1005-TTTA**

|                                                            |       |       |
|------------------------------------------------------------|-------|-------|
| UUUAGAGCAAGCUCAGUUUACACCUUGUCCGACGGUGUAAACUGAGCUUGCUCUUUUU | Reads |       |
| .UAGAGCAAGCUCAGUUUACACC.....                               | 28    | 0.71  |
| .AGAGCAAGCUCAGUUUXXXXXXXXXX.                               | 3811  | 96.97 |
| .GAGCAAGCUCAGUUUACACXX.....                                | 56    | 1.42  |
| .AGCAAGCUCAGUUUACACCX.....                                 | 35    | 0.89  |
| .GCAAGCUCAGUUUACACXX.....                                  | 22    |       |
| .CAAGCUCAGUUUACACXXXX.                                     | 9     |       |
| .AAGCUCAGUUUACACXXXX.                                      | 30    |       |
| .UGUCCGACGGUGUAAAC.....                                    | 2     |       |
| .UCCGACGGUGUAAACUGAGXXXXXXX.                               | 4     |       |
| .CCGACGGUGUAAACUGAGXXXXXXX.                                | 7     |       |
| .CGACGGUGUAAACUGAGXXXXXXX.                                 | 13    |       |
| .GACGGUGUAAACUGAGCUUGCUCXXX.                               | 18    |       |
| .ACGGUGUAAACUGAGCUUGCUCXXX.                                | 12    |       |
| .CGGUGUAAACUGAGCUUGCUCXXX.                                 | 7     |       |
| .GGUGUAAACUGAGCUUGCUCUX.                                   | 5     |       |
| .GUGUAAACUGAGCUUGCUCXXXX.                                  | 322   |       |

|                             |      |
|-----------------------------|------|
| .....UGUAAACUGAGCUUGCXXXXXX | 6175 |
| .....GUAACUGAGCUUGCXXXX     | 162  |
| .....UAAACUGAGCUUGCUCUUXX   | 36   |
| .....AAACUGAGCUUGCUCUXX.    | 30   |
| .....AACUGAGCUUGCUCUXX.     | 16   |
| .....ACUGAGCUUGCUCUUXX.     | 17   |
| .....CUGAGCUUGCUCUUUU.      | 2    |
| .....UGAGCUUGCUCUUUUU       | 3    |

**#sh1005-TC**

|                                                          |       |       |
|----------------------------------------------------------|-------|-------|
| UCGAGCAAGCUCAGUUUACACCUUGUCCGACGGUGUAAACUGAGCUUGCUCUUUUU | Reads |       |
| UCGAGCAAGCUCAGUUUXXXXX.....                              | 252   | 9.62  |
| .CGAGCAAGCUCAGUUUACXXXXXX.....                           | 408   | 15.58 |
| ..GAGCAAGCUCAGUUUAXXXXXXXXXXX.....                       | 1883  | 71.90 |
| ...AGCAAGCUCAGUUUACACCX.....                             | 16    | 0.61  |
| ....GCAAGCUCAGUUUACACXXXX.....                           | 52    | 1.99  |
| .....CAAGCUCAGUUUACACXXXX.....                           | 8     | 0.31  |
| .....AAGCUCAGUUUACACXXXX.....                            | 33    |       |
| .....AGCUCAGUUUACACCU.....                               | 3     |       |
| .....CUCAGUUUACACCUUG.....                               | 2     |       |
| .....UCAGUUUACACCUUGUCCGACGG.....                        | 3     |       |
| .....UUACACCUUGUCCGACGGUGUAAACU.....                     | 2     |       |
| .....ACCUUGUCCGACGGUGUAAACUGAXXX.....                    | 4     |       |
| .....CCUUGUCCGACGGUGUAAAXXXXXXX.....                     | 9     |       |
| .....CUUGUCCGACGGUGUAAACUG.....                          | 3     |       |
| .....UUGUCCGACGGUGUAAACUGXXXXXX.....                     | 4     |       |
| .....UGUCCGACGGUGUAAACUGAGCUUGCXX.....                   | 8     |       |
| .....GUCCGACGGUGUAAACUGAGCUUGCUCX.....                   | 5     |       |
| .....UCCGACGGUGUAAACUGXXXXXXXXXXXX.....                  | 31    |       |
| .....CCGACGGUGUAAACUGXXXXXXXXXXXX.....                   | 116   |       |
| .....CGACGGUGUAAACUGAXXXXXXXXXXXXX.....                  | 48    |       |
| .....GACGGUGUAAACUGAGXXXXXXXXXXXX.....                   | 81    |       |
| .....ACGGUGUAAACUGAGCUUGCXXXXXX.....                     | 173   |       |
| .....CGGUGUAAACUGAGCUUGCXXXXXX.....                      | 47    |       |
| .....GGUGUAAACUGAGCUUGCXXXXXX.....                       | 44    |       |
| .....GUGUAAACUGAGCUUGCXXXXXX.....                        | 87    |       |
| .....UGUAAACUGAGCUUGCXXXXXX                              | 7923  |       |
| .....GUAACUGAGCUUGCUCXXXX                                | 193   |       |
| .....UAAACUGAGCUUGCUCXXXX.                               | 42    |       |
| .....AAACUGAGCUUGCUCXXXX.                                | 63    |       |
| .....AACUGAGCUUGCUCUXX.                                  | 21    |       |
| .....ACUGAGCUUGCUCUUXX.                                  | 11    |       |
| .....CUGAGCUUGCUCUUUU.                                   | 3     |       |

**#sh1005-TTC**

|                                                           |       |       |
|-----------------------------------------------------------|-------|-------|
| UUCGAGCAAGCUCAGUUUACACCUUGUCCGACGGUGUAAACUGAGCUUGCUCUUUUU | Reads |       |
| UUCGAGCAAGCUCAGUUUACACX.....                              | 13    | 0.75  |
| .UCGAGCAAGCUCAGUUUACAXXX.....                             | 473   | 27.15 |
| ..CGAGCAAGCUCAGUUUACAXXXXXXX.....                         | 473   | 27.15 |
| ...GAGCAAGCUCAGUUUAXXXXXXXXXXX.....                       | 741   | 42.54 |
| ....AGCAAGCUCAGUUUACACC.....                              | 6     | 0.34  |
| .....GCAAGCUCAGUUUACACXXXX.....                           | 36    | 2.07  |
| .....CAAGCUCAGUUUACACC.....                               | 6     | 0.34  |
| .....AAGCUCAGUUUACACC.....                                | 13    | 0.75  |
| .....UUGUCCGACGGUGUAAACU.....                             | 2     |       |
| .....UGUCCGACGGUGUAAACUGAG.....                           | 2     |       |
| .....GUCCGACGGUGUAAACUGAGC.....                           | 2     |       |
| .....UCCGACGGUGUAAACUGAGCUUGCUCUU.....                    | 10    |       |
| .....CCGACGGUGUAAACUGAGXXXXXXXXXXXX.....                  | 19    |       |

|                                    |      |
|------------------------------------|------|
| .....CGACGGUGUAAACUGAXXXXXXXXXXX.. | 18   |
| .....GACGGUGUAAACUGAGCUUGCXXXXX..  | 23   |
| .....ACGGUGUAAACUGAGCUUGCXXXXX..   | 43   |
| .....CGGUGUAAACUGAGCUUGCXXXXX..    | 12   |
| .....GGUGUAAACUGAGCUUGCUCXXXXX..   | 15   |
| .....GUGUAAACUGAGCUUGCUCXXXX..     | 62   |
| .....UGUAAACUGAGCUUGCXXXXXXXXXX    | 4297 |
| .....GUAAACUGAGCUUGCUCXXXX..       | 111  |
| .....UAAACUGAGCUUGCUCXXXX..        | 29   |
| .....AAACUGAGCUUGCUCUXXX..         | 14   |
| .....AACUGAGCUUGCUCUUX..           | 7    |
| .....ACUGAGCUUGCUCUUU..            | 4    |
| .....CUGAGCUUGCUCUUUU..            | 2    |

**#sh1005-CT**

|                                                          |       |       |
|----------------------------------------------------------|-------|-------|
| CUGAGCAAGCUCAGUUUACACCUUGUCCGACGGUGUAAACUGAGCUUGCUCUUUUU | Reads |       |
| CUGAGCAAGCUCAGUUUACXXX.....                              | 771   | 23.97 |
| .UGAGCAAGCUCAGUUUACXXXXXXXXXX.....                       | 298   | 9.26  |
| .GAGCAAGCUCAGUUUAXXXXXXXXXXXXXX.....                     | 2049  | 63.69 |
| ..AGCAAGCUCAGUUUACACXX.....                              | 27    | 0.84  |
| ...GCAAGCUCAGUUUACACXXXXX.....                           | 60    | 1.87  |
| ....CAAGCUCAGUUUACACXX.....                              | 12    | 0.37  |
| .....AAGCUCAGUUUACACX.....                               | 31    |       |
| .....AGCUCAGUUUACACCUUGU.....                            | 2     |       |
| .....UUACACCUUGUCCGACGGUGUA.....                         | 2     |       |
| .....UACACCUUGUCCGACGGUGU.....                           | 4     |       |
| .....ACCUUGUCCGACGGUGUAAACUGAGXXX.....                   | 5     |       |
| .....CUUGUCCGACGGUGUAA.....                              | 2     |       |
| .....UUGUCCGACGGUGUAAXXX.....                            | 5     |       |
| .....UGUCCGACGGUGUAAACXXXXXXXXXX.....                    | 12    |       |
| .....GUCCGACGGUGUAAACUGAGCUUGCXXX.....                   | 9     |       |
| .....UCCGACGGUGUAAACUGAGCXXXXXXXXXX.....                 | 47    |       |
| .....CCGACGGUGUAAACUGXXXXXXXXXXXXX.....                  | 96    |       |
| .....CGACGGUGUAAACUGAXXXXXXXXXXXXXX.....                 | 87    |       |
| .....GACGGUGUAAACUGAGCXXXXXXXXXXXXX.....                 | 120   |       |
| .....ACGGUGUAAACUGAGCXXXXXXXXXXXXX.....                  | 209   |       |
| .....CGGUGUAAACUGAGCUUGCXXXXX.....                       | 62    |       |
| .....GGUGUAAACUGAGCUUGCUCXXXX..                          | 33    |       |
| .....GUGUAAACUGAGCUUGCUCXXXX..                           | 67    |       |
| .....UGUAAACUGAGCUUGCXXXXXXXXXX                          | 6788  |       |
| .....GUAAACUGAGCUUGCUCXXXX..                             | 194   |       |
| .....UAAACUGAGCUUGCUCXXXX..                              | 27    |       |
| .....AAACUGAGCUUGCUCUXXX..                               | 44    |       |
| .....AACUGAGCUUGCUCUUX..                                 | 13    |       |
| .....ACUGAGCUUGCUCUUU..                                  | 7     |       |

**#sh1005-TG**

|                                                          |       |       |
|----------------------------------------------------------|-------|-------|
| UGGAGCAAGCUCAGUUUACACCUUGUCCGACGGUGUAAACUGAGCUUGCUCUUUUU | Reads |       |
| UGGAGCAAGCUCAGUUUACXXX.....                              | 138   | 5.50  |
| .GGAGCAAGCUCAGUUUXXXXXXXXXXXXX.....                      | 2184  | 87.01 |
| .GAGCAAGCUCAGUUUACACXX.....                              | 114   | 4.54  |
| ..AGCAAGCUCAGUUUACACC.....                               | 9     | 0.36  |
| ...GCAAGCUCAGUUUACACXXXXX.....                           | 47    | 1.87  |
| ....CAAGCUCAGUUUACACXXXXX.....                           | 18    | 0.72  |
| .....AAGCUCAGUUUACACXXXXX.....                           | 24    |       |
| .....GCUCAGUUUACACCUUGUCCGA.....                         | 2     |       |
| .....CUCAGUUUACACCUUGU.....                              | 2     |       |
| .....UACACCUUGUCCGACGGUGU.....                           | 2     |       |
| .....CUUGUCCGACGGUGUAAACUG.....                          | 3     |       |

|                                          |      |
|------------------------------------------|------|
| .....UUGUCCGACGGUGUAAACUG.....           | 3    |
| .....UGUCCGACGGUGUAAACUGAGCUUGCUC.....   | 2    |
| .....GUCCGACGGUGUAAACUGXXX.....          | 4    |
| .....UCCGACGGUGUAAACUGAGCUUGCUCX.....    | 4    |
| .....CCGACGGUGUAAACUGXXXXXXXXXXXXX.....  | 60   |
| .....CGACGGUGUAAACUGAXXXXXXXXXXXXXX..... | 40   |
| .....GACGGUGUAAACUGAGCUUXXXXXXXXXX.....  | 51   |
| .....ACGGUGUAAACUGAGCUXXXXXXXXXX.....    | 124  |
| .....CGGUGUAAACUGAGCUUGCXXXXXXXXX.....   | 38   |
| .....GGUGUAAACUGAGCUUGCUCUXXX.....       | 32   |
| .....GUGUAAACUGAGCUUGCUCUUX.....         | 14   |
| .....UGUAAACUGAGCUUGCXXXXXXXXX.....      | 5297 |
| .....GUAAACUGAGCUUGCXXXXXXXXX.....       | 155  |
| .....UAAACUGAGCUUGCUCUXXXX.....          | 33   |
| .....AAACUGAGCUUGCUCUXXX.....            | 33   |
| .....AACUGAGCUUGCUCUUX.....              | 8    |
| .....ACUGAGCUUGCUCUUX.....               | 11   |
| .....CUGAGCUUGCUCUUUU.....               | 18   |
| .....UGAGCUUGCUCUUUU.....                | 2    |

**#sh1005-CA**

|                                                          |       |       |
|----------------------------------------------------------|-------|-------|
| CAGAGCAAGCUCAGUUUACACCUUGUCCGACGGUGUAAACUGAGCUUGCUCUUUUU | Reads |       |
| CAGAGCAAGCUCAGUUUAXXXXXX.....                            | 342   | 3.40  |
| .AGAGCAAGCUCAGUUUXXXXXXXXXXXXX.....                      | 9366  | 93.08 |
| ..GAGCAAGCUCAGUUUACAXXXXXXX.....                         | 196   | 1.95  |
| ...AGCAAGCUCAGUUUACAXX.....                              | 74    | 0.74  |
| ....GCAAGCUCAGUUUACACXXXXX.....                          | 67    | 0.67  |
| .....CAAGCUCAGUUUACACC.....                              | 17    | 0.17  |
| .....AAGCUCAGUUUACACCXXXX.....                           | 47    |       |
| .....AGCUCAGUUUACACCU.....                               | 2     |       |
| .....GCUCAGUUUACACCUUGUC.....                            | 2     |       |
| .....UUACACCUUGUCCGACG.....                              | 3     |       |
| .....UACACCUUGUCCGACGGUGU.....                           | 2     |       |
| .....ACCUUGUCCGACGGUGUAAACUGAGCU.....                    | 3     |       |
| .....CUUGUCCGACGGUGUAAACUG.....                          | 3     |       |
| .....UUGUCCGACGGUGUAAACUGXXXXXXXXX.....                  | 9     |       |
| .....UGUCCGACGGUGUAAACUGAGCUUG.....                      | 2     |       |
| .....GUCCGACGGUGUAAACUGAGCXXXXXXXXX.....                 | 16    |       |
| .....UCCGACGGUGUAAACUGAGCUUGCUCXX.....                   | 5     |       |
| .....CCGACGGUGUAAACUGXXXXXXXXXXXXX.....                  | 77    |       |
| .....CGACGGUGUAAACUGAXXXXXXXXXXXXXX.....                 | 48    |       |
| .....GACGGUGUAAACUGAGCUXXXXXXXXXXXXX.....                | 68    |       |
| .....ACGGUGUAAACUGAGCUUGXXXXXXXXXX.....                  | 110   |       |
| .....CGGUGUAAACUGAGCUUGXXXXXXXXXX.....                   | 43    |       |
| .....GGUGUAAACUGAGCUUGCUCUXXX.....                       | 50    |       |
| .....GUGUAAACUGAGCUUGCXXXXXXXXXX.....                    | 334   |       |
| .....UGUAAACUGAGCUUGCXXXXXXXXXX.....                     | 8442  |       |
| .....GUAAACUGAGCUUGCUCXXXXXXXXX.....                     | 241   |       |
| .....UAAACUGAGCUUGCUCUUX.....                            | 46    |       |
| .....AAACUGAGCUUGCUCUUX.....                             | 49    |       |
| .....AACUGAGCUUGCUCUU.....                               | 15    |       |
| .....ACUGAGCUUGCUCUU.....                                | 13    |       |
| .....CUGAGCUUGCUCUUUX.....                               | 11    |       |
| .....UGAGCUUGCUCUUUU.....                                | 3     |       |

**#sh1005-CG**

|                                                          |       |       |
|----------------------------------------------------------|-------|-------|
| CGGAGCAAGCUCAGUUUACACCUUGUCCGACGGUGUAAACUGAGCUUGCUCUUUUU | Reads |       |
| CGGAGCAAGCUCAGUUUXXXXXXXXX.....                          | 745   | 17.71 |
| .GGAGCAAGCUCAGUUUXXXXXXXXXXXXX.....                      | 3268  | 77.70 |



|                                    |      |      |
|------------------------------------|------|------|
| ..GAGCAAGCUCAGUUUACACXXXX.         | 109  | 2.59 |
| ..AGCAAGCUCAGUUUACACCCX.           | 19   | 0.45 |
| ...GCAAGCUCAGUUUACACX.             | 54   | 1.28 |
| ....CAAGCUCAGUUUACACCCX.           | 11   | 0.26 |
| .....AAGCUCAGUUUACACCCXX.          | 24   | 0.57 |
| .....AGCUCAGUUUACACCUUG.           | 2    | 0.05 |
| .....UCAGUUUACACCUUGUCCGACGG.      | 2    |      |
| .....CACCUUGUCCGACGGUGUA.          | 3    |      |
| .....ACCUUGUCCGACGGUGUAAAXX.       | 5    |      |
| .....CCUUGUCCGACGGUGUAAACUG.       | 2    |      |
| .....CUUGUCCGACGGUGUAAACUGAGCUUXX. | 6    |      |
| .....UUGUCCGACGGUGUAAACUGXXXXXX.   | 7    |      |
| .....UGUCCGACGGUGUAAAC.            | 3    |      |
| .....GUCCGACGGUGUAAACUGAGC.        | 3    |      |
| .....UCCGACGGUGUAAACUGXXXXXXXXXX.  | 18   |      |
| .....CCGACGGUGUAAACUGXXXXXXXXXX.   | 79   |      |
| .....CGACGGUGUAAACUGAXXXXXXXXXXX.  | 75   |      |
| .....GACGGUGUAAACUGAGCXXXXXXXXXX.  | 87   |      |
| .....ACGGUGUAAACUGAGCUUGCXXXXXX.   | 247  |      |
| .....CGGUGUAAACUGAGCUUGCXXXXXX.    | 47   |      |
| .....GGUGUAAACUGAGCUUGCXXXXXX.     | 33   |      |
| .....GUGUAAACUGAGCUUGCXXXXXX.      | 48   |      |
| .....UGUAAACUGAGCUUGCXXXXXX.       | 7865 |      |
| .....GUAAACUGAGCUUGCXXXXXX.        | 250  |      |
| .....UAAACUGAGCUUGCUCXXXX.         | 41   |      |
| .....AAACUGAGCUUGCUCXXXX.          | 46   |      |
| .....AACUGAGCUUGCUCUXX.            | 26   |      |
| .....ACUGAGCUUGCUCUUUX.            | 12   |      |
| .....CUGAGCUUGCUCUUUU.             | 19   |      |
| .....UGAGCUUGCUCUUUUU.             | 2    |      |

**#sh1005-CC**

|                                                          |       |       |
|----------------------------------------------------------|-------|-------|
| CCGAGCAAGCUCAGUUUACACCUUGUCCGACGGUGUAAACUGAGCUUGCUCUUUUU | Reads |       |
| CCGAGCAAGCUCAGUUUXXXXXXXX.                               | 787   | 20.06 |
| .CGAGCAAGCUCAGUUUACXXXXXXXX.                             | 522   | 13.14 |
| ..GAGCAAGCUCAGUUUAXXXXXXXXX.                             | 2418  | 60.86 |
| ...AGCAAGCUCAGUUUACACXX.                                 | 33    | 0.83  |
| ....GCAAGCUCAGUUUACACXXXX.                               | 147   | 3.70  |
| .....CAAGCUCAGUUUACACC.                                  | 17    | 0.43  |
| .....AAGCUCAGUUUACACCCX.                                 | 30    | 0.76  |
| .....AGCUCAGUUUACACCUXXX.                                | 10    | 0.25  |
| .....CUCAGUUUACACCUUGUCC.                                | 2     |       |
| .....UCAGUUUACACCUUGUCCGAC.                              | 2     |       |
| .....CAGUUUACACCUUGUCCGACGG.                             | 2     |       |
| .....GUUUACACCUUGUCCGACGG.                               | 3     |       |
| .....UACACCUUGUCCGACGGUGU.                               | 6     |       |
| .....UUGUCCGACGGUGUAAAXXXXXXXXX.                         | 9     |       |
| .....UGUCCGACGGUGUAAACU.                                 | 3     |       |
| .....GUCCGACGGUGUAAACUGAGCUUGCUCU.                       | 2     |       |
| .....UCCGACGGUGUAAACUGXXXXXXXXXX.                        | 21    |       |
| .....CCGACGGUGUAAACUGXXXXXXXXXX.                         | 77    |       |
| .....CGACGGUGUAAACUGAXXXXXXXXXXX.                        | 49    |       |
| .....GACGGUGUAAACUGAGCUUGCXXXX.                          | 99    |       |
| .....ACGGUGUAAACUGAGCUUGCXXXX.                           | 144   |       |
| .....CGGUGUAAACUGAGCUUGCUCXXXX.                          | 33    |       |
| .....GGUGUAAACUGAGCUUGCUCXXXX.                           | 44    |       |
| .....GUGUAAACUGAGCUUGCUCXXXX.                            | 100   |       |
| .....UGUAAACUGAGCUUGCXXXXXX.                             | 5780  |       |
| .....GUAAACUGAGCUUGCUCXXXX.                              | 193   |       |

|                            |    |
|----------------------------|----|
| .....UAAACUGAGCUUGCUCUXXX. | 47 |
| .....AAACUGAGCUUGCUCUXX.   | 37 |
| .....AACUGAGCUUGCUCUUXX.   | 19 |
| .....ACUGAGCUUGCUCUUU.     | 9  |
| .....CUGAGCUUGCUCUUUU.     | 2  |

**#shR1005-GG**

|                                                             |       |       |
|-------------------------------------------------------------|-------|-------|
| uuguggGAGCAAGCUCAGUUUACACCUUguccgacggUGUAAACUGAGCUUGCUCUUuu | Reads |       |
| ..UGGGAGCAAGCUCAGUUUACACC.....                              | 4     | 0.01  |
| ....GGGAGCAAGCUCAGUUXXXXXXXXXXXXX.....                      | 15271 | 52.91 |
| .....GGAGCAAGCUCAGUUUXXXXXXXXXXXXX.....                     | 4458  | 15.45 |
| .....GAGCAAGCUCAGUUUAXXXXXXXXXXXXXX.....                    | 5548  | 19.22 |
| .....AGCAAGCUCAGUUUACXXXXXXXXXXXXX.....                     | 2705  | 9.37  |
| .....GCAAGCUCAGUUUACAXXXXXXXXXXXXXX.....                    | 338   | 1.17  |
| .....CAAGCUCAGUUUACACXXXXXXXXXXXXX.....                     | 220   | 0.76  |
| .....AAGCUCAGUUUACACCXXXXXXXXXXXXX.....                     | 319   | 1.11  |
| .....AGCUCAGUUUACACCUXXXXXXXXXXXXX.....                     | 238   |       |
| .....GCUCAGUUUACACCUUXXXXXXXXXXXXX.....                     | 51    |       |
| .....CUCAGUUUACACCUUGXXXXXXXXXXXXX.....                     | 142   |       |
| .....UCAGUUUACACCUUGUXXXXXXXXXXXXX.....                     | 40    |       |
| .....CAGUUUACACCUUGUCCXXXXXXXXXXXXX.....                    | 80    |       |
| .....AGUUUACACCUUGUCCXXXXXXXXXXXXX.....                     | 47    |       |
| .....GUUUACACCUUGUCCGXXXXXXXXXXXXX.....                     | 51    |       |
| .....UUUACACCUUGUCCGAXXXXXXXXXXXXXX.....                    | 75    |       |
| .....UUACACCUUGUCCGACXXXXXXXXXXXXX.....                     | 76    |       |
| .....UACACCUUGUCCGACGXXXXXXXXXXXXX.....                     | 95    |       |
| .....ACACCUUGUCCGACGGXXXXXXXXXXXXX.....                     | 39    |       |
| .....CACCUUGUCCGACGGUXXXXXXXXXXXXX.....                     | 212   |       |
| .....ACCUUGUCCGACGGUGXXXXXXXXXXXXX.....                     | 378   |       |
| .....CCUUGUCCGACGGUGUXXXXXXXXXXXXX.....                     | 530   |       |
| .....CUUGUCCGACGGUGUAXXXXXXXXXXXXX.....                     | 846   |       |
| .....UUGUCCGACGGUGUAAXXXXXXXXXXXXXX.....                    | 273   |       |
| .....UGUCCGACGGUGUAAAXXXXXXXXXXXXXX.....                    | 234   |       |
| .....GUCCGACGGUGUAAACXXXXXXXXXXXXX.....                     | 107   |       |
| .....UCCGACGGUGUAAACUXXXXXXXXXXXXX.....                     | 83    |       |
| .....CCGACGGUGUAAACUGXXXXXXXXXXXXX.....                     | 880   |       |
| .....CGACGGUGUAAACUGAXXXXXXXXXXXXXX.....                    | 1228  |       |
| .....GACGGUGUAAACUGAGXXXXXXXXXXXXX.....                     | 1675  |       |
| .....ACGGUGUAAACUGAGCXXXXXXXXXXXXX.....                     | 1690  |       |
| .....CGGUGUAAACUGAGCUXXXXXXXXXXXXX.....                     | 1048  |       |
| .....GGUGUAAACUGAGCUUXXXXXXXXXXXXX.....                     | 1044  |       |
| .....GUGUAAACUGAGCUUGXXXXXXXXXXXXX.....                     | 690   |       |
| .....UGUAAACUGAGCUUGCXXXXXXXXXXXXX.....                     | 35243 |       |
| .....GUAAACUGAGCUUGCXXXXXXXXXXXXX.....                      | 2037  |       |
| .....UAAACUGAGCUUGCUCXXXXXXXXXXXXX.....                     | 491   |       |
| .....AAACUGAGCUUGCUCUXXXXXXXXXXXXX.....                     | 433   |       |
| .....AACUGAGCUUGCUCUUXXXX.....                              | 337   |       |
| .....ACUGAGCUUGCUCUUUXX.....                                | 273   |       |
| .....CUGAGCUUGCUCUUUU.....                                  | 329   |       |
| .....UGAGCUUGCUCUUUU.....                                   | 53    |       |

**#shR1005-GGG**

|                                                             |       |       |
|-------------------------------------------------------------|-------|-------|
| uuggggGAGCAAGCUCAGUUUACACCUUguccgacggUGUAAACUGAGCUUGCUCUUuu | Reads |       |
| ..GGGGAGCAAGCUCAGUUUACXXXX.....                             | 24    | 0.07  |
| ....GGGAGCAAGCUCAGUXXXXXXXXXXXXX.....                       | 340   | 0.99  |
| .....GGGAGCAAGCUCAGUUUXXXXXXXXXXXXX.....                    | 8806  | 25.77 |
| .....GGAGCAAGCUCAGUUUXXXXXXXXXXXXX.....                     | 6109  | 17.88 |
| .....GAGCAAGCUCAGUUUAXXXXXXXXXXXXXX.....                    | 14926 | 43.68 |
| .....AGCAAGCUCAGUUUACXXXXXXXXXXXXX.....                     | 2821  | 8.26  |

|                                           |       |      |
|-------------------------------------------|-------|------|
| .....GCAAGCUCAGUUUACAXXXXXXXXXXXXXX.....  | 631   | 1.85 |
| .....CAAGCUCAGUUUACACXXXXXXXXXXXXX.....   | 222   | 0.65 |
| .....AAGCUCAGUUUACACXXXXXXXXXXXXX.....    | 294   | 0.86 |
| .....AGCUCAGUUUACACCUXXXXXXXXXXXXX.....   | 214   |      |
| .....GCUCAGUUUACACCUUXXXXXXXXXXXXX.....   | 78    |      |
| .....CUCAGUUUACACCUUGXXXXXXXXXXXXX.....   | 143   |      |
| .....UCAGUUUACACCUUGUCCXXXXXXXXXXXXX..... | 35    |      |
| .....CAGUUUACACCUUGUCCXXXXXXXXXXXXX.....  | 65    |      |
| .....AGUUUACACCUUGUCCXXXXXXXXXXXXX.....   | 40    |      |
| .....GUUUACACCUUGUCCGACXXXXXXXXXXXXX..... | 52    |      |
| .....UUUACACCUUGUCCGACGXXXXXXXXXXXXX..... | 69    |      |
| .....UUACACCUUGUCCGACGXXXXXXXXXXXXX.....  | 86    |      |
| .....UACACCUUGUCCGACGXXXXXXXXXXXXX.....   | 82    |      |
| .....ACACCUUGUCCGACGGXXXXXXXXXXXXX.....   | 46    |      |
| .....CACCUUGUCCGACGGUXXXXXXXXXXXXX.....   | 238   |      |
| .....ACCUUGUCCGACGGUGXXXXXXXXXXXXX.....   | 368   |      |
| .....CCUUGUCCGACGGUGUXXXXXXXXXXXXX.....   | 506   |      |
| .....CUUGUCCGACGGUGUAXXXXXXXXXXXXX.....   | 887   |      |
| .....UUGUCCGACGGUGUAAXXXXXXXXXXXXXX.....  | 327   |      |
| .....UGUCCGACGGUGUAAAXXXXXXXXXXXXXX.....  | 253   |      |
| .....GUCCGACGGUGUAAACXXXXXXXXXXXXX.....   | 77    |      |
| .....UCCGACGGUGUAAACUXXXXXXXXXXXXX.....   | 114   |      |
| .....CCGACGGUGUAAACUGXXXXXXXXXXXXX.....   | 847   |      |
| .....CGACGGUGUAAACUGAXXXXXXXXXXXXXX.....  | 1524  |      |
| .....GACGGUGUAAACUGAGXXXXXXXXXXXXX.....   | 1891  |      |
| .....ACGGUGUAAACUGAGCXXXXXXXXXXXXX.....   | 1799  |      |
| .....CGGUGUAAACUGAGCUXXXXXXXXXXXXX.....   | 1091  |      |
| .....GGUGUAAACUGAGCUUXXXXXXXXXXXXX.....   | 767   |      |
| .....GUGUAAACUGAGCUUGXXXXXXXXXXXXX.....   | 900   |      |
| .....UGUAAACUGAGCUUGCXXXXXXXXXXXXX.....   | 44172 |      |
| .....GUAAACUGAGCUUGCXXXXXXXXXXXXX.....    | 2304  |      |
| .....UAAACUGAGCUUGCUCXXXXXXXXXXXXX.....   | 648   |      |
| .....AAACUGAGCUUGCUCUXXXXXXXXXXXXX.....   | 468   |      |
| .....AACUGAGCUUGCUCUUXXXXXXXXXXXXX.....   | 313   |      |
| .....ACUGAGCUUGCUCUUUXXXXXXXXXXXXX.....   | 283   |      |
| .....CUGAGCUUGCUCUUUUXXXXXXXXXXXXX.....   | 226   |      |
| .....UGAGCUUGCUCUUUUUXXXXXXXXXXXXX.....   | 42    |      |

**#shR1005 dt**

|                                                            | Reads |       |
|------------------------------------------------------------|-------|-------|
| uuguuGAGCAAGCUCAGUUUACACCUUguccgacggUGUAAACUGAGCUUGCUCUUuu |       |       |
| ..GUUGAGCAAGCUCAGUUUACACC.....                             | 13    | 0.05  |
| ..UUGAGCAAGCUCAGUUUACACCXXX.....                           | 11    | 0.04  |
| ...UGAGCAAGCUCAGUUUACAXXXXXX.....                          | 160   | 0.58  |
| ....GAGCAAGCUCAGUUUAXXXXXXXXXXXXXX.....                    | 24508 | 88.35 |
| .....AGCAAGCUCAGUUUACXXXXXXXXXXXXX.....                    | 1779  | 6.41  |
| .....GCAAGCUCAGUUUACXXXXXXXXXXXXX.....                     | 732   | 2.64  |
| .....CAAGCUCAGUUUACAXXXXXXXXXXXXXX.....                    | 239   | 0.86  |
| .....AAGCUCAGUUUACACXXXXXXXXXXXXX.....                     | 299   | 1.08  |
| .....AGCUCAGUUUACACCUXXXXXXXXXXXXX.....                    | 228   |       |
| .....GCUCAGUUUACACCUUXXXXXXXXXXXXX.....                    | 62    |       |
| .....CUCAGUUUACACCUUGXXXXXXXXXXXXX.....                    | 154   |       |
| .....UCAGUUUACACCUUGUXXXXXXXXXXXXX.....                    | 43    |       |
| .....CAGUUUACACCUUGUCXXXXXXXXXXXXX.....                    | 85    |       |
| .....AGUUUACACCUUGUCCXXXXXXXXXXXXX.....                    | 65    |       |
| .....GUUUACACCUUGUCCGXXXXXXXXXXXXX.....                    | 83    |       |
| .....UUUACACCUUGUCCGACXXXXXXXXXXXXX.....                   | 97    |       |
| .....UUACACCUUGUCCGACXXXXXXXXXXXXX.....                    | 89    |       |
| .....UACACCUUGUCCGACGXXXXXXXXXXXXX.....                    | 126   |       |
| .....ACACCUUGUCCGACGGXXXXXXXXXXXXX.....                    | 60    |       |

|                                        |       |
|----------------------------------------|-------|
| .....CACCUUGUCCGACGGUXXXXXXXXXX.....   | 261   |
| .....ACCUUGUCCGACGGUGXXXXXXXXXX.....   | 482   |
| .....CCUUGUCCGACGGUGUXXXXXXXXXX.....   | 572   |
| .....CUUGUCCGACGGUGUAXXXXXXXXXXX.....  | 916   |
| .....UUGUCCGACGGUGUAAAXXXXXXXXXXX..... | 389   |
| .....UGUCCGACGGUGUAAAAXXXXXXXXXXX..... | 297   |
| .....GUCCGACGGUGUAAACXXXXXXXXXX.....   | 103   |
| .....UCCGACGGUGUAAACUXXXXXXXXXX.....   | 116   |
| .....CCGACGGUGUAAACUGXXXXXXXXXX.....   | 1100  |
| .....CGACGGUGUAAACUGAXXXXXXXXXXX.....  | 1566  |
| .....GACGGUGUAAACUGAGXXXXXXXXXX.....   | 2006  |
| .....ACGGUGUAAACUGAGCXXXXXXXXXX.....   | 2316  |
| .....CGGUGUAAACUGAGCUXXXXXXXXXX.....   | 1103  |
| .....GGUGUAAACUGAGCUUXXXXXXXXXX.....   | 2737  |
| .....GUGUAAACUGAGCUUGXXXXXXXXXX.....   | 994   |
| .....UGUAAACUGAGCUUGCXXXXXXXXXX.....   | 40391 |
| .....GUAAACUGAGCUUGCXXXXXXXXXX.....    | 2241  |
| .....UAAACUGAGCUUGCXXXXXXXXXX.....     | 526   |
| .....AAACUGAGCUUGCXXXXXXXXXX.....      | 533   |
| .....AACUGAGCUUGCXXXXXXXXXX.....       | 307   |
| .....ACUGAGCUUGCXXXXXXXXXX.....        | 242   |
| .....CUGAGCUUGCXXXXXXXXXX.....         | 68    |
| .....UGAGCUUGCXXXXXXXXXX.....          | 9     |

**#shR1005 dTT**

|                                                            | Reads |       |
|------------------------------------------------------------|-------|-------|
| uuuguGAGCAAGCUCAGUUUACACCUUguccgacggUGUAAACUGAGCUUGCUCUUuu |       |       |
| ..GUGAGCAAGCUCAGUUUACAXX.....                              | 185   | 1.00  |
| ..UGAGCAAGCUCAGUUUACACC.....                               | 2     | 0.01  |
| ...GAGCAAGCUCAGUUUAXXXXXXXXXXX.....                        | 8337  | 45.24 |
| ....AGCAAGCUCAGUUUACXXXXXXXXXX.....                        | 5432  | 29.47 |
| .....GCAAGCUCAGUUUACAXXXXXXXXXXX.....                      | 3679  | 19.96 |
| .....CAAGCUCAGUUUACACXXXXXXXXXX.....                       | 192   | 1.04  |
| .....AAGCUCAGUUUACACXXXXXXXXXX.....                        | 603   | 3.27  |
| .....AGCUCAGUUUACACUXXXXXXXXXX.....                        | 221   |       |
| .....GCUCAGUUUACACCUUXXXXXXXXXX.....                       | 49    |       |
| .....CUCAGUUUACACCUUGXXXXXXXXXX.....                       | 112   |       |
| .....UCAGUUUACACCUUGUXXXXXXXXXX.....                       | 26    |       |
| .....CAGUUUACACCUUGUCXXXXXXXXXX.....                       | 76    |       |
| .....AGUUUACACCUUGUCCXXXXXXXXXX.....                       | 34    |       |
| .....GUUUACACCUUGUCCGXXXXXXXXXX.....                       | 56    |       |
| .....UUUACACCUUGUCCGACXXXXXXXXXX.....                      | 59    |       |
| .....UUACACCUUGUCCGACXXXXXXXXXX.....                       | 63    |       |
| .....UACACCUUGUCCGACGXXXXXXXXXX.....                       | 98    |       |
| .....ACACCUUGUCCGACGXXXXXXXXXX.....                        | 42    |       |
| .....CACCUUGUCCGACGGUXXXXXXXXXX.....                       | 205   |       |
| .....ACCUUGUCCGACGGUGXXXXXXXXXX.....                       | 303   |       |
| .....CCUUGUCCGACGGUGUXXXXXXXXXX.....                       | 496   |       |
| .....CUUGUCCGACGGUGUAXXXXXXXXXXX.....                      | 715   |       |
| .....UUGUCCGACGGUGUAAAXXXXXXXXXXX.....                     | 290   |       |
| .....UGUCCGACGGUGUAAAAXXXXXXXXXXX.....                     | 257   |       |
| .....GUCCGACGGUGUAAACXXXXXXXXXX.....                       | 148   |       |
| .....UCCGACGGUGUAAACUGXXXXXXXXXX.....                      | 122   |       |
| .....CCGACGGUGUAAACUGXXXXXXXXXX.....                       | 1372  |       |
| .....CGACGGUGUAAACUGAXXXXXXXXXXX.....                      | 1326  |       |
| .....GACGGUGUAAACUGAGXXXXXXXXXX.....                       | 1639  |       |
| .....ACGGUGUAAACUGAGCXXXXXXXXXX.....                       | 1480  |       |
| .....CGGUGUAAACUGAGCUXXXXXXXXXX.....                       | 1672  |       |
| .....GGUGUAAACUGAGCUUXXXXXXXXXX.....                       | 560   |       |
| .....GUGUAAACUGAGCUUGXXXXXXXXXX.....                       | 734   |       |

|                             |       |
|-----------------------------|-------|
| .....UGUAAACUGAGCUUGCXXXXXX | 24380 |
| .....GUAACUGAGCUUGCXXXXXX   | 1493  |
| .....UAAACUGAGCUUGCXXXX.    | 331   |
| .....AAACUGAGCUUGCXXXX.     | 264   |
| .....AACUGAGCUUGCXXXX.      | 187   |
| .....ACUGAGCUUGCXXXX.       | 103   |
| .....CUGAGCUUGCXXXX.        | 23    |
| .....UGAGCUUGCXXXX.         | 2     |

**#shR1005 dTTT**

|                                                                                                   | Reads |       |
|---------------------------------------------------------------------------------------------------|-------|-------|
| uugGAGCAAGCUCAGUUACACCUUgucgacgUGUAAACUGAGCUUGCUCUUuu                                             | 8     | 0.06  |
| UUGGAGCAAGCUCAGUUACACX.....                                                                       | 8     | 0.06  |
| .UGGAGCAAGCUCAGUUACACX.....                                                                       | 127   | 1.02  |
| . .GGAGCAAGCUCAGUUAXXXXXXXXXX.....                                                                | 1137  | 9.13  |
| . . .GAGCAAGCUCAGUUAXXXXXXXXXX.....                                                               | 3116  | 25.01 |
| . . . .AGCAAGCUCAGUUACXXXXXXXXXXXX.....                                                           | 5278  | 42.37 |
| . . . . .GCAAGCUCAGUUACXXXXXXXXXXXX.....                                                          | 56    | 0.45  |
| . . . . . .CAAGCUCAGUUACXXXXXXXXXXXX.....                                                         | 2727  | 21.89 |
| . . . . . . .AAGCUCAGUUACXXXXXXXXXXXX.....                                                        | 194   |       |
| . . . . . . . .AGCUCAGUUACXXXXXXXXXXXX.....                                                       | 46    |       |
| . . . . . . . . .GCUCAGUUACCUXXXXXXXXXXXX.....                                                    | 91    |       |
| . . . . . . . . . .CUCAGUUACCUXXXXXXXXXXXX.....                                                   | 39    |       |
| . . . . . . . . . . .UCAGUUACCUXXXXXXXXXXXX.....                                                  | 48    |       |
| . . . . . . . . . . . .CAGUUACCUXXXXXXXXXXXX.....                                                 | 29    |       |
| . . . . . . . . . . . . .AGUUACCUXXXXXXXXXXXX.....                                                | 33    |       |
| . . . . . . . . . . . . . .GUUUACCUXXXXXXXXXXXX.....                                              | 34    |       |
| . . . . . . . . . . . . . . .UUUACCUXXXXXXXXXXXX.....                                             | 37    |       |
| . . . . . . . . . . . . . . . .UUACCUXXXXXXXXXXXX.....                                            | 54    |       |
| . . . . . . . . . . . . . . . . .UACCUXXXXXXXXXXXX.....                                           | 18    |       |
| . . . . . . . . . . . . . . . . . .ACACCUXXXXXXXXXXXX.....                                        | 83    |       |
| . . . . . . . . . . . . . . . . . . .CACCUXXXXXXXXXXXX.....                                       | 164   |       |
| . . . . . . . . . . . . . . . . . . . .ACCUXXXXXXXXXXXX.....                                      | 291   |       |
| . . . . . . . . . . . . . . . . . . . . .CUUXXXXXXXXXXXX.....                                     | 430   |       |
| . . . . . . . . . . . . . . . . . . . . . .CUUGXXXXXXXXXXXX.....                                  | 180   |       |
| . . . . . . . . . . . . . . . . . . . . . . .UUGXXXXXXXXXXXX.....                                 | 187   |       |
| . . . . . . . . . . . . . . . . . . . . . . . .UGXXXXXXXXXXXX.....                                | 86    |       |
| . . . . . . . . . . . . . . . . . . . . . . . . .GUXXXXXXXXXXXX.....                              | 106   |       |
| . . . . . . . . . . . . . . . . . . . . . . . . . .UCCXXXXXXXXXXXX.....                           | 769   |       |
| . . . . . . . . . . . . . . . . . . . . . . . . . . .CCGXXXXXXXXXXXX.....                         | 941   |       |
| . . . . . . . . . . . . . . . . . . . . . . . . . . . .CGXXXXXXXXXXXX.....                        | 1074  |       |
| . . . . . . . . . . . . . . . . . . . . . . . . . . . . .GACXXXXXXXXXXXX.....                     | 918   |       |
| . . . . . . . . . . . . . . . . . . . . . . . . . . . . . .ACGXXXXXXXXXXXX.....                   | 2472  |       |
| . . . . . . . . . . . . . . . . . . . . . . . . . . . . . . .CGXXXXXXXXXXXX.....                  | 260   |       |
| . . . . . . . . . . . . . . . . . . . . . . . . . . . . . . . .GGUXXXXXXXXXXXX.....               | 377   |       |
| . . . . . . . . . . . . . . . . . . . . . . . . . . . . . . . . .UGUXXXXXXXXXXXX.....             | 11498 |       |
| . . . . . . . . . . . . . . . . . . . . . . . . . . . . . . . . . .GUAXXXXXXXXXXXX.....           | 688   |       |
| . . . . . . . . . . . . . . . . . . . . . . . . . . . . . . . . . . .UAAXXXXXXXXXXXX.....         | 170   |       |
| . . . . . . . . . . . . . . . . . . . . . . . . . . . . . . . . . . . .AAACUXXXXXXXXXXXX.....     | 143   |       |
| . . . . . . . . . . . . . . . . . . . . . . . . . . . . . . . . . . . . .AACUXXXXXXXXXXXX.....    | 84    |       |
| . . . . . . . . . . . . . . . . . . . . . . . . . . . . . . . . . . . . . .ACUXXXXXXXXXXXX.....   | 51    |       |
| . . . . . . . . . . . . . . . . . . . . . . . . . . . . . . . . . . . . . . .CUGXXXXXXXXXXXX..... | 7     |       |

**#mU6 TI 1**

|                                   | Reads |       |
|-----------------------------------|-------|-------|
| UGAUAUUUGUGGUAGUGGUUUUUUCGUA      | 40    | 81.63 |
| .GAUUAUUUGUGGUAGUGGUUUUUU....     | 2     | 4.08  |
| . .AUUAUUUGUGGUAGUGGUUUUUU....    | 7     | 14.29 |
| . . .UAUUAUUUGUGGUAGUGGUUUUUU.... |       |       |

**#mU6 TI 2**

|                               |       |       |
|-------------------------------|-------|-------|
| AGAUAAUUUGUGGUAGUGGUUUUUUCGUA | Reads |       |
| AGAUAAUUUGUGGUAGUGGUXXXXX...  | 91    | 81.98 |
| .GAUAAUUUGUGGUAGUGGUUUUX....  | 10    | 9.01  |
| ..AUAAUUUGUGGUAGUGGUUUUU...   | 3     | 2.70  |
| ...UAAUUUGUGGUAGUGGUUUUU....  | 7     | 6.31  |

**#mU6 TI 3**

|                               |       |       |
|-------------------------------|-------|-------|
| CGAUAAUUUGUGGUAGUGGUUUUUUCGUA | Reads |       |
| .GAUAAUUUGUGGUAGUGGUXXXXX.... | 45    | 78.95 |
| ..AUAAUUUGUGGUAGUGGUUUUX....  | 5     | 8.77  |
| ...UAAUUUGUGGUAGUGGUUUUX....  | 7     | 12.28 |

**#mU6 TI 4**

|                               |       |       |
|-------------------------------|-------|-------|
| GGAUAAUUUGUGGUAGUGGUUUUUUCGUA | Reads |       |
| GGAUAAUUUGUGGUAGUGGUXXXXX...  | 99    | 77.34 |
| .GAUAAUUUGUGGUAGUGGUUUUX....  | 16    | 12.50 |
| ..AUAAUUUGUGGUAGUGGUUUUX....  | 8     | 6.25  |
| ...UAAUUUGUGGUAGUGGUUUUU....  | 5     | 3.91  |

**#mU6 TI 5**

|                                |       |       |
|--------------------------------|-------|-------|
| UUGAUAAUUUGUGGUAGUGGUUUUUUCGUA | Reads |       |
| ..GAUAAUUUGUGGUAGUGGUXXXXX.... | 35    | 76.09 |
| ...AUAAUUUGUGGUAGUGGUUUUUUCG.. | 2     | 4.35  |
| ...UAAUUUGUGGUAGUGGUUUUXXXX.   | 9     | 19.57 |

**#mU6 TI 6**

|                                 |       |       |
|---------------------------------|-------|-------|
| UAGAUAAUUUGUGGUAGUGGUUUUUUCGUA  | Reads |       |
| UAGAUAAUUUGUGGUAGUGGUUUUU.....  | 2     | 1.14  |
| .AGAUAAUUUGUGGUAGUXXXXXXXXXX... | 156   | 88.64 |
| ..GAUAAUUUGUGGUAGUGGUUUUX....   | 9     | 5.11  |
| ...AUAAUUUGUGGUAGUGGUUUUU.....  | 2     | 1.14  |
| ...UAAUUUGUGGUAGUGGUUUUU.....   | 7     | 3.98  |

**#mU6 TI 7**

|                                |       |       |
|--------------------------------|-------|-------|
| UCGAUAAUUUGUGGUAGUGGUUUUUUCGUA | Reads |       |
| ..GAUAAUUUGUGGUAGUGGUUUUX....  | 60    | 90.91 |
| ...UAAUUUGUGGUAGUGGUUUUU.....  | 6     | 9.09  |

**#mU6 TI 8**

|                                |       |       |
|--------------------------------|-------|-------|
| UGGAUAAUUUGUGGUAGUGGUUUUUUCGUA | Reads |       |
| .GGAUAAUUUGUGGUAGUGGUXXXXX.... | 90    | 93.75 |
| ..GAUAAUUUGUGGUAGUGGUUUUU..... | 4     | 4.17  |
| ...UAAUUUGUGGUAGUGGUUUUU.....  | 2     | 2.08  |

**#mU6 TI 9**

|                                 |       |  |
|---------------------------------|-------|--|
| UUUGAUAAUUUGUGGUAGUGGUUUUUUCGUA | Reads |  |
| ***GAUAAUUUGUGGUAGUGGUU*****    | 0     |  |

**#mU6 TI 10**

|                                  |       |       |
|----------------------------------|-------|-------|
| UUAGAUAAUUUGUGGUAGUGGUUUUUUCGUA  | Reads |       |
| ..AGAUAAUUUGUGGUAGUGGXXXXXXXX... | 68    | 94.44 |
| ...AUAAUUUGUGGUAGUGGUUUUX.....   | 4     | 5.56  |

**#mU6 TI 11**

|                                 |       |  |
|---------------------------------|-------|--|
| UUCGAUAAUUUGUGGUAGUGGUUUUUUCGUA | Reads |  |
| ..CGAUAAUUUGUGGUAGUGGUUUUU..... | 5     |  |
| ...GAUAAUUUGUGGUAGUGGUUU.....   | 2     |  |

**#mU6 TI 12**

|                                 |       |       |
|---------------------------------|-------|-------|
| UUGGAUAAUUUGUGGUAGUGGUUUUUUCGUA | Reads |       |
| ..GGAUAAUUUGUGGUAGUGGUUUUXXX... | 51    | 94.00 |
| .....UAAUUUGUGGUAGUGGUUUUU..... | 3     | 6.00  |

**#mU6 TI 13**

|                                      |       |  |
|--------------------------------------|-------|--|
| UUUUGAUAAUUUGUGGUAGUGGUUUUUUCGUA     | Reads |  |
| XXXXXXXXXXXXXXXXXXXXXXXXXXXXXXXXXXXX | 0     |  |

**#mU6 TI 14**

|                                  |       |  |
|----------------------------------|-------|--|
| UUUAGAUAAUUUGUGGUAGUGGUUUUUUCGUA | Reads |  |
| ...AGAUAUUUGUGGUAGUGGUUUUU.....  | 4     |  |

**#mU6 TI 15**

|                                      |       |  |
|--------------------------------------|-------|--|
| UUUCGAUAAUUUGUGGUAGUGGUUUUUUCGUA     | Reads |  |
| XXXXXXXXXXXXXXXXXXXXXXXXXXXXXXXXXXXX | 0     |  |

**#mU6 TI 16**

|                                  |       |  |
|----------------------------------|-------|--|
| UUUGGAUAAUUUGUGGUAGUGGUUUUUUCGUA | Reads |  |
| ..GGAUAAUUUGUGGUAGUGGUUUUU.....  | 4     |  |

**#shR-miR-451**

|                                                |       |       |
|------------------------------------------------|-------|-------|
| UUAACCGUUACCAUUACUGAGUUUAGUAAUGGUAAUGGUUCUUUUU | Reads |       |
| .UAAACCGUUACCAUUACUGAGUUUX.....                | 5     | 0.01  |
| ..AAACCGUUACCAUUACXXXXXXXXXXXX.....            | 34443 | 84.94 |
| ...AACCGUUACCAUUACUXXXXXXXXXXXX.....           | 764   | 1.88  |
| ....ACCGUUACCAUUACUGXXXXXXXXXXXX.....          | 600   | 1.48  |
| .....CCGUUACCAUUACUGXXXXXXXXXXXX.....          | 982   | 2.42  |
| .....CGUUACCAUUACUGAGXXXXXXXXXXXX.....         | 3757  | 9.26  |
| .....GUUACCAUUACUGAGUXXXXXXXXXXXX.....         | 1918  |       |
| .....UUACCAUUACUGAGUUXXXXXXXXXXXX.....         | 422   |       |
| .....UACCAUUACUGAGUUUXXXXXXXXXXXX.....         | 567   |       |
| .....ACCAUUACUGAGUUUAAXXXXXX.....              | 283   |       |
| .....CCAUUACUGAGUUUAGXXXXX.....                | 124   |       |
| .....CAUUACUGAGUUUAGUXXXXX.....                | 335   |       |
| .....AUUACUGAGUUUAGUAXXXXXX.....               | 363   |       |
| .....UUACUGAGUUUAGUAAXXXXXX.....               | 55    |       |
| .....UACUGAGUUUAGUAAUXXXXXXXXXXXX.....         | 99    |       |
| .....ACUGAGUUUAGUAAUGXXXXXXXXXXXX.....         | 50    |       |
| .....CUGAGUUUAGUAAUGGXXXXXXXXXXXX.....         | 381   |       |
| .....UGAGUUUAGUAAUGGUXXXXXXXXXXXXX.....        | 423   |       |
| .....GAGUUUAGUAAUGGUAXXXXXXXXXXXXX.....        | 1528  |       |
| .....AGUUUAGUAAUGGUAAAXXXXXXXXXXXXX.....       | 977   |       |
| .....GUUUAGUAAUGGUAAUXXXXXXXXXXXX.....         | 2275  |       |
| .....UUUAGUAAUGGUAAUGXXXXXXXXXXXX.....         | 3248  |       |
| .....UUAGUAAUGGUAAUGGXXXXXXXXXXXX.....         | 4665  |       |
| .....UAGUAAUGGUAAUGGUXXXXXXXXXXXX.....         | 1769  |       |
| .....AGUAAUGGUAAUGGUUXXXXXXXXXXXX.....         | 581   |       |
| .....GUAAUGGUAAUGGUUCXXXXX.....                | 359   |       |
| .....UAAUGGUAAUGGUUCUXXXXX.....                | 193   |       |
| .....AAUGGUAAUGGUUCUXXXXX.....                 | 212   |       |
| .....AUGGUAAUGGUUCUXXXXX.....                  | 84    |       |
| .....UGGUAAUGGUUCUUUU.....                     | 6     |       |
| .....GGUAAUGGUUCUUUU.....                      | 9     |       |

**#shR-miR-31**

|                                                                 |       |  |
|-----------------------------------------------------------------|-------|--|
| UAGGCAAGAUGCUGGCAUAGCUGUUGAACUGGGAACCUGCUAUGCCAACAUAUUGCCAUUUUU | Reads |  |
|-----------------------------------------------------------------|-------|--|

|                                   |      |       |
|-----------------------------------|------|-------|
| UAGGCAAGAUGCUGGCAUAGCXX.....      | 10   | 0.36  |
| .AGGCAAGAUGCUGGCAXXXXXXXXXX.....  | 2621 | 94.28 |
| .GGCAAGAUGCUGGCAUAGCXXXX.....     | 65   | 2.34  |
| .GCAAGAUGCUGGCAUAGCXXX.....       | 27   | 0.97  |
| .CAAGAUGCUGGCAUAGCXXXX.....       | 24   | 0.86  |
| .AAGAUGCUGGCAUAGCXXXXXXXX.....    | 33   | 1.19  |
| .AGAUGCUGGCAUAGCXXXXXXXX.....     | 17   |       |
| .GAUGCUGGCAUAGCUGXXXX.....        | 12   |       |
| .AUGCUGGCAUAGCUGXXXX.....         | 16   |       |
| .UGCUGGCAUAGCUGUXXXX.....         | 9    |       |
| .UGGCAUAGCUGUUAACXXXXXXXX.....    | 4    |       |
| .CUGUUAACUGGGAACXXXXXXXX.....     | 34   |       |
| .UGUUAACUGGGAACCGCXXXX.....       | 69   |       |
| .GUUAACUGGGAACCGCXXXX.....        | 14   |       |
| .UUAACUGGGAACCGCUAUGXXXX.....     | 56   |       |
| .UGAACUGGGAACCGCUAUGCXXXX.....    | 7    |       |
| .ACUGGGAACCGCUAUGCCAACAUAUX.....  | 4    |       |
| .CUGGGAACCGCUAUGCCXXXXXXXX.....   | 63   |       |
| .UGGGAACCGCUAUGCCXXXXXXXX.....    | 62   |       |
| .GGGAACCGCUAUGCCXXXXXXXXXXXX..... | 157  |       |
| .GGAACCGCUAUGCCXXXXXXXXXXXX.....  | 77   |       |
| .GAACCGCUAUGCCAACAUAUX.....       | 24   |       |
| .AACCGCUAUGCCAACAUAUXXXXXXXX..... | 39   |       |
| .ACCGCUAUGCCAACAUAUXXXXXXXX.....  | 46   |       |
| .CCCGCUAUGCCAACAUAUXXXXXXXX.....  | 65   |       |
| .CUGCUAUGCCAACAUAUXXXXXXXX.....   | 168  |       |
| .UGCUAUGCCAACAUAUXXXXXXXX.....    | 5667 |       |
| .GCUAUGCCAACAUAUXXXXXXXX.....     | 1281 |       |
| .CUAUGCCAACAUAUUGCXXXXXXXX.....   | 1808 |       |
| .UAUGCCAACAUAUUGCXXXXXXXX.....    | 5071 |       |
| .AUGCCAACAUAUUGCXXXXXXXX.....     | 295  |       |
| .UGCCAACAUAUUGCAXXXXX.....        | 55   |       |
| .GCCAACAUAUUGCAXXXX.....          | 32   |       |
| .CCAACAUAUUGCAXXX.....            | 13   |       |
| .CAACAUAUUGCAXUXX.....            | 25   |       |
| .AACUAUUGCAXUUU.....              | 5    |       |

**#V45 pHIPPY PGL3 hU6 promoter**

|                                                        | Reads |       |
|--------------------------------------------------------|-------|-------|
| UUUAUAUAUCUUGUGGCUAGCGUCUAAAAAGAGCUGUUUCUGAGGAGCCUUUUU |       |       |
| .....AAAAAGAGCUGUUUCU.....                             | 2     |       |
| .....AAAAGAGCUGUUUCUGXXXXXXXX.....                     | 26    | 0.03  |
| .....AAAGAGCUGUUUCUGAGGAXXXXX.....                     | 90    | 0.09  |
| .....AAGAGCUGUUUCUGAGGAXXXXX.....                      | 689   | 0.67  |
| .....AGAGCUGUUUCUGAGGAXXXXX.....                       | 14642 | 14.34 |
| .....GAGCUGUUUCUGAGGAXXXXX.....                        | 72130 | 70.62 |
| .....AGCUGUUUCUGAGGAGXXXX.....                         | 8372  | 8.20  |
| .....GCUGUUUCUGAGGAGCXXXX.....                         | 3587  | 3.51  |
| .....CUGUUUCUGAGGAGCCXXXX.....                         | 855   | 0.84  |
| .....UGUUUCUGAGGAGCCUXXXX.....                         | 1744  | 1.71  |
| .....GUUUUCUGAGGAGCCUUXXX.....                         | 1118  |       |
| .....UUUCUGAGGAGCCUUUXX.....                           | 596   |       |
| .....UUCUGAGGAGCCUUUUXX.....                           | 573   |       |
| .....UCUGAGGAGCCUUUUU.....                             | 29    |       |

**#V45 pHIPPY PGL3 hH1 promoter**

|                                                          | Reads |       |
|----------------------------------------------------------|-------|-------|
| UUUAUAAGUGGAUCCUGAGACCGUCUAAAAAGGCCUCCUCAGAAACAGCUCUUUUU |       |       |
| .....AAAAAGGCCUCCUCAGAXXXXXXXXX.....                     | 980   |       |
| .....AAAAGGCCUCCUCAGAAACXXXXXXXX.....                    | 6315  | 4.41  |
| .....AAAGGCCUCCUCAGAAACXXXXXXXX.....                     | 20047 | 13.99 |



|                                 |       |       |
|---------------------------------|-------|-------|
| .....AAGGCUCCUCAGAAACXXXXXXXXXX | 15368 | 10.73 |
| .....AGGCUCCUCAGAAACXXXXXXXXXX  | 85450 | 59.65 |
| .....GGCUCCUCAGAAACAGXXXXXXXXXX | 14412 | 10.06 |
| .....GCUCCUCAGAAACAGCXXXXXXXXXX | 657   | 0.46  |
| .....CUCCUCAGAAACAGCUCXXXXXXXX  | 496   | 0.35  |
| .....UCCUCAGAAACAGCUCXXXXXXXX   | 265   | 0.18  |
| .....CCUCAGAAACAGCUCUXXXX       | 238   | 0.17  |
| .....CUCAGAAACAGCUCUUXXXX       | 277   |       |
| .....UCAGAAACAGCUCUUUXX         | 211   |       |
| .....CAGAAACAGCUCUUUXX          | 98    |       |
| .....AGAAACAGCUCUUUUU           | 8     |       |

**#shp53 pLKO.1 puro**

|                                                                    | Reads |       |
|--------------------------------------------------------------------|-------|-------|
| GGACGAAACACCGACUCCAGUGGUAUUCUACUUCUUCAGAGAGUAGAUUACCACUGGAGUCUUUUU |       |       |
| .....CCGACUCCAGUGGUAUUCUACU.....                                   | 2     | 0.11  |
| .....CGACUCCAGUGGUAUUCUACXX.....                                   | 38    | 2.12  |
| .....GACUCCAGUGGUAUUCXXXXXXXXXX.....                               | 1619  | 90.14 |
| .....ACUCCAGUGGUAUUCUACXXXXXXXXX.....                              | 19    | 1.06  |
| .....CUCCAGUGGUAUUCUAXXXXXX.....                                   | 55    | 3.06  |
| .....UCCAGUGGUAUUCUACXXXXXXXXX.....                                | 38    | 2.12  |
| .....CCAGUGGUAUUCUACUXXXXXXXXXX.....                               | 25    | 1.39  |
| .....CAGUGGUAUUCUACUUCXXXXX.....                                   | 8     |       |
| .....AGUGGUAUUCUACUUCUUCAGAGAG.....                                | 2     |       |
| .....UGGUAUUCUACUUCUUCAGAG.....                                    | 2     |       |
| .....GGUAUUCUACUUCUUCAGAGAGUAG.....                                | 2     |       |
| .....GUAUUCUACUUCUUCAGAGXXXXXXXXX.....                             | 13    |       |
| .....UAAUCUACUUCUUCAGAGAGXXXXX.....                                | 10    |       |
| .....AAUCUACUUCUUCAGAGAG.....                                      | 2     |       |
| .....AUCUACUUCUUCAGAGAG.....                                       | 2     |       |
| .....UCUACUUCUUCAGAGAGU.....                                       | 3     |       |
| .....CUACUUCUUCAGAGAGUAGAX.....                                    | 6     |       |
| .....UACUUCUUCAGAGAGUAGXX.....                                     | 13    |       |
| .....ACUUCUUCAGAGAGUAGAU.....                                      | 6     |       |
| .....CUUCAAGAGAGUAGAUXXXXXXXXXXXXX.....                            | 130   |       |
| .....UUCAAGAGAGUAGAUUACXXXXXXXXXXXXX.....                          | 54    |       |
| .....UCAAGAGAGUAGAUUAXXXXXXXXXXXXXX.....                           | 42    |       |
| .....CAAGAGAGUAGAUUACCACUGXXXXXX.....                              | 19    |       |
| .....AAGAGAGUAGAUUACCAXXXXXXXXXXXXXX.....                          | 121   |       |
| .....AGAGAGUAGAUUACCACXXXXXXXXXXXXX.....                           | 60    |       |
| .....GAGAGUAGAUUACCACUGGXXXXXXXXXXXXX.....                         | 90    |       |
| .....AGAGUAGAUUACCACUGGXXXXXXXXXXXXX.....                          | 227   |       |
| .....GAGUAGAUUACCACUGGXXXXXXXXXXXXX.....                           | 127   |       |
| .....AGUAGAUUACCACUGGXXXXXXXXXXXXX.....                            | 40    |       |
| .....GUAGAUUACCACUGGAXXXXXXXXXXXXXX.....                           | 417   |       |
| .....UAGAUUACCACUGGAGXXXXXXXXXXXXX.....                            | 3297  |       |
| .....AGAUUACCACUGGAGUCXXXXX.....                                   | 108   |       |
| .....GAUUACCACUGGAGUCXXX.....                                      | 51    |       |
| .....AUUACCACUGGAGUCXXX.....                                       | 57    |       |
| .....UUACCACUGGAGUCUUX.....                                        | 18    |       |
| .....UACCACUGGAGUCUUUX.....                                        | 20    |       |
| .....ACCACUGGAGUCUUUU.....                                         | 3     |       |

**#shp63alpha pLKO.1**

|                                                                    | Reads |       |
|--------------------------------------------------------------------|-------|-------|
| GACGAAACACCGGCCGUUUCGUCAGAACACACAUCUCGAGAUGUGUGUUCUGACGAAACGGUUUUU |       |       |
| .....ACACCGGCCGUUUCGUCAGAA.....                                    | 6     |       |
| .....CGGCCGUUUCGUCAGAACACAXX.....                                  | 26    | 0.23  |
| .....GGCCGUUUCGUCAGAAAXXXXXXXXXXXXXX.....                          | 10796 | 96.52 |
| .....GCCGUUUCGUCAGAACXXXXX.....                                    | 128   | 1.14  |
| .....CCGUUUCGUCAGAACAXXXXXX.....                                   | 48    | 0.43  |

|                                          |       |      |
|------------------------------------------|-------|------|
| .....CGUUUCGUCAGAACACAXX.....            | 84    | 0.75 |
| .....GUUUCGUCAGAACACAXXX.....            | 103   | 0.92 |
| .....UUUCGUCAGAACACACXXXXXX.....         | 28    |      |
| .....UUCGUCAGAACACACAXXX.....            | 21    |      |
| .....UCGUCAGAACACACAUCXXXXX.....         | 19    |      |
| .....CGUCAGAACACACAUC.....               | 4     |      |
| .....UCAGAACACACAUCUCGAGAU.....          | 2     |      |
| .....CAGAACACACAUCUCG.....               | 2     |      |
| .....AGAACACACAUCUCGAGAUGUG.....         | 2     |      |
| .....AACACACAUCUCGAGAUXXXX.....          | 16    |      |
| .....CACACAUCUCGAGAUGX.....              | 6     |      |
| .....CACAUUCUCGAGAUGUGUG.....            | 3     |      |
| .....ACAUCUCGAGAUGUGUX.....              | 7     |      |
| .....CAUCUCGAGAUGUGUG.....               | 5     |      |
| .....AUCUCGAGAUGUGUGUXXXXXXXXXXX.....    | 50    |      |
| .....UCUCGAGAUGUGUGUUCXXXXXXXXXX.....    | 19    |      |
| .....CUCGAGAUGUGUGUUCXXXXXXXXXX.....     | 32    |      |
| .....UCGAGAUGUGUGUUCXXXXXXXXXX.....      | 52    |      |
| .....CGAGAUGUGUGUUCUGACGAAACGXXX.....    | 13    |      |
| .....GAGAUGUGUGUUCUGACGAAACX.....        | 7     |      |
| .....AGAUGUGUGUUCUGACGAAAXXXXXXXXXX..... | 35    |      |
| .....GAUGUGUGUUCUGACGAAAXXXXXXXXXX.....  | 53    |      |
| .....AUGUGUGUUCUGACGAAACXXXXXXXXX.....   | 17    |      |
| .....UGUGUGUUCUGACGAAACXXXXXXXXX.....    | 255   |      |
| .....GUGUGUUCUGACGAAAXXXXXXXXXX.....     | 88    |      |
| .....UGUGUUCUGACGAAAXXXXXXXXXX.....      | 59739 |      |
| .....GUGUUCUGACGAAACGXXXXXX.....         | 1197  |      |
| .....UGUUCUGACGAAACGGXXXXXX.....         | 486   |      |
| .....GUUCUGACGAAACGGUXXXXXX.....         | 147   |      |
| .....UUCUGACGAAACGGUXXXXXX.....          | 60    |      |
| .....UCUGACGAAACGGUXXXXXX.....           | 88    |      |
| .....CUGACGAAACGGUXXXXXX.....            | 49    |      |
| .....UGACGAAACGGUXXXXXX.....             | 12    |      |

**#shLUC pRRL**

|                                                           | Reads |       |
|-----------------------------------------------------------|-------|-------|
| CCGGUCCUAAGGUUAAGUCGCCUCGCUCGAGCGAGGGCGACUUAACCUUAGGUUUUU |       |       |
| ..GGUCCUAAGGUUAAGUXXXXXXXXX.....                          | 1125  | 89.21 |
| ..GUCCUAAGGUUAAGUCGXXXXXX.....                            | 59    | 4.68  |
| ...UCCUAAGGUUAAGUCGCCUXXXXX.....                          | 66    | 5.23  |
| ....CCUAAGGUUAAGUCGCCUXXXXX.....                          | 7     | 0.56  |
| .....CUAAGGUUAAGUCGCCUC.....                              | 4     | 0.32  |
| .....UAAGGUUAAGUCGCCUCXXXXXX.....                         | 18    |       |
| .....AAGGUUAAGUCGCCUXXXXXX.....                           | 91    |       |
| .....AGGUUAAGUCGCCUCXXXXX.....                            | 64    |       |
| .....GGUUAAGUCGCCUCGXXX.....                              | 99    |       |
| .....GUUAAGUCGCCUCGCXXX.....                              | 22    |       |
| .....UUAAGUCGCCUCGCUC.....                                | 2     |       |
| .....UAAGUCGCCUCGCUCXXXXX.....                            | 9     |       |
| .....CUCGAGCGAGGGCGACUUAACCUUA.....                       | 2     |       |
| .....UCGAGCGAGGGCGACUXXXXXXXXXX.....                      | 62    |       |
| .....CGAGCGAGGGCGACUXXXXXXXXXX.....                       | 57    |       |
| .....GAGCGAGGGCGACUUAAXXXXXX.....                         | 5     |       |
| .....GCGAGGGCGACUUAACCUUAGGXXXXX.....                     | 46    |       |
| .....CGAGGGCGACUUAACCUUAGGUX.....                         | 4     |       |
| .....GAGGGCGACUUAACCUUAGGUUUX.....                        | 14    |       |
| .....AGGGCGACUUAACCUUAGGXXXXX.....                        | 1504  |       |
| .....GGGCGACUUAACCUUAGGUUXXXX.....                        | 112   |       |
| .....GGCGACUUAACCUUAGGUUXXXX.....                         | 71    |       |
| .....GCGACUUAACCUUAGGUXXXXX.....                          | 16    |       |

|                            |    |
|----------------------------|----|
| .....CGACUUAACCUUAGGUUUXX. | 4  |
| .....GACUUAACCUUAGGUUUXX.. | 11 |
| .....ACUUAACCUUAGGUUUXX.   | 10 |

**#pSUPER Scr**

|                                                                    |       |       |
|--------------------------------------------------------------------|-------|-------|
| CCACAGAUCCCCGCGAAAGAUGAUAGCUAAUUC AAGAGAUUAGCUUAUCAUCUUUCGCUUUUUUA | Reads |       |
| .....CCCCGCGAAAGAUGAUAGCUX.....                                    | 8     | 0.51  |
| .....CCCGCGAAAGAUGAUAXXXXXXXXXX.....                               | 229   | 14.71 |
| .....CCGCGAAAGAUGAUAGXXXXXXXXX.....                                | 314   | 20.17 |
| .....CGCGAAAGAUGAUAGXXXXXXXXX.....                                 | 428   | 27.49 |
| .....GCGAAAGAUGAUAGCXXXXXXXXXXXXX.....                             | 565   | 36.29 |
| .....CGAAAGAUGAUAGCUXXX.....                                       | 8     | 0.51  |
| .....GAAAGAUGAUAGCUAAXXX.....                                      | 5     | 0.32  |
| .....GAUGAUAGCUAAUUCAAGAGA.....                                    | 2     |       |
| .....AUUCAAGAGAUUAGCUXXXXXXXXXXXXXX.....                           | 19    |       |
| .....UUCAAGAGAUUAGCUUAUCAUCUXXX.....                               | 10    |       |
| .....UCAAGAGAUUAGCUUAUCAUCUU.....                                  | 2     |       |
| .....CAAGAGAUUAGCUUAUCAUCUUUCGCU.....                              | 2     |       |
| .....AAGAGAUUAGCUUAUCAUCUUUCGCU.....                               | 9     |       |
| .....AGAGAUUAGCUUAUCAUXXXXXXXXXXXXX.....                           | 9     |       |
| .....GAGAUUAGCUUAUCAUCUUUCGCUXXXX.....                             | 66    |       |
| .....AGAUUAGCUUAUCAUCUUXXXXXXXXXXXXX.....                          | 27    |       |
| .....GAUUAGCUUAUCAUCUUXXXXXXXXXXXXX.....                           | 287   |       |
| .....AUUAGCUUAUCAUCUUUCGCUUX.....                                  | 76    |       |
| .....UUAGCUUAUCAUCUUUCXXXXXXXXXXXXX.....                           | 6225  |       |
| .....UAGCUUAUCAUCUUUCXXXXXXXXXXXXX.....                            | 487   |       |
| .....AGCUUAUCAUCUUUCGCUUX.....                                     | 28    |       |
| .....GCUUAUCAUCUUUCGCUUX.....                                      | 5     |       |
| .....CUUAUCAUCUUUCGCUXX.....                                       | 18    |       |
| .....UUAUCAUCUUUCGCUUX.....                                        | 71    |       |
| .....UAUCAUCUUUCGCUUX.....                                         | 41    |       |

**#pSUPER GFP**

|                                                                      |       |       |
|----------------------------------------------------------------------|-------|-------|
| CCACAGAUCCCCGCGACACAAGCUGGAGUACAAUUC AAGAGAUUGUACUCCAGCUUGUGCCUUUUUA | Reads |       |
| .....CCCCGCGACACAAGCUGGAGUACAX.....                                  | 13    | 0.28  |
| .....CCCGCGACACAAGCUGGAGUAXXXXXX.....                                | 567   | 11.99 |
| .....CCGCGACACAAGCUGGAGXXXXXXXXXX.....                               | 1342  | 28.39 |
| .....CGGCACACAAGCUGGAGUXXXXXXXXXXXXX.....                            | 1384  | 29.28 |
| .....GGCACAAGCUGGAGUAXXXXXXXXXXXXXX.....                             | 1339  | 28.33 |
| .....GCACAAGCUGGAGUACXXXXX.....                                      | 24    | 0.51  |
| .....CACACAAGCUGGAGUACAAXXX.....                                     | 15    | 0.32  |
| .....ACAAGCUGGAGUACAAXXXXXXXXXXXXXX.....                             | 25    | 0.53  |
| .....CAAGCUGGAGUACAAXXX.....                                         | 18    | 0.38  |
| .....AAGCUGGAGUACAAXXX.....                                          | 4     |       |
| .....CUGGAGUACAAXUCAAGAGA.....                                       | 4     |       |
| .....UGGAGUACAAXUCAAGAGAXXXXXX.....                                  | 5     |       |
| .....GAGUACAAXUCAAGAGAUXXXXXX.....                                   | 18    |       |
| .....AGUACAAXUCAAGAGAUUGXX.....                                      | 6     |       |
| .....GUACAAXUCAAGAGAU.....                                           | 2     |       |
| .....UCAAXUCAAGAGAUUG.....                                           | 2     |       |
| .....CAAUUCAAGAGAUUGUAXXX.....                                       | 11    |       |
| .....AAUUCAAGAGAUUGUAXXXXXXXXXXXXXX.....                             | 68    |       |
| .....AUUCAAGAGAUUGUACXXXXXXXXXXXXX.....                              | 66    |       |
| .....UUCAAGAGAUUGUACUXXXXXXXXXXXXX.....                              | 68    |       |
| .....UCAAGAGAUUGUACUCXXXXXXXXXXXXX.....                              | 86    |       |
| .....CAAGAGAUUGUACUCCAGXXXXXXXXXXXXX.....                            | 21    |       |
| .....AAGAGAUUGUACUCCAGXXXXXXXXXXXXX.....                             | 50    |       |
| .....AGAGAUUGUACUCCAGXXXXXXXXXXXXX.....                              | 29    |       |
| .....GAGAUUGUACUCCAGCUUGUGCXXXXX.....                                | 72    |       |

|                                      |      |
|--------------------------------------|------|
| .....AGAUUGUACUCCAGCUXXXXXXXXXXXXX.  | 62   |
| .....GAUUGUACUCCAGCUXXXXXXXXXXXXX..  | 272  |
| .....AUUGUACUCCAGCUUGXXXXXXXXXXXXX.. | 110  |
| .....UUGUACUCCAGCUUGXXXXXXXXXXXXX.   | 3296 |
| .....UGUACUCCAGCUUGGXXXXXXXXXXXXX.   | 3286 |
| .....GUACUCCAGCUUGGUCXXXXXXXXXXXXX   | 421  |
| .....UACUCCAGCUUGGUCXXXXXXXXXXXXX.   | 146  |
| .....ACUCCAGCUUGGUCXXXXXXXXXXXXX.    | 129  |
| .....CUCCAGCUUGGUCUXXXXXXXXXXXXX.    | 79   |
| .....UCCAGCUUGGUCUUUXX..             | 62   |
| .....CCAGCUUGGUCUUUUXX.              | 13   |
| .....CAGCUUGGUCUUUUU.                | 4    |

**#pSUPER macroH2A1**

|                                                                    |       |       |
|--------------------------------------------------------------------|-------|-------|
| CCACAGAUCCCCGGGUGCAGACAAAUGUGAAUUC AAGAGAUUCACAUUUGUCUGCACCCUUUUUA | Reads |       |
| .....CCCGGGUGCAGACAAAXXXXXXXXXXXXX.                                | 84    | 2.31  |
| .....CCGGGUGCAGACAAAUGUXXXXXXXXXXXXX.                              | 800   | 22.04 |
| .....CGGGUGCAGACAAAUGXXXXXXXXXXXXXX.                               | 1219  | 33.58 |
| .....GGGUGCAGACAAAUGUXXXXXXXXXXXXXX.                               | 1474  | 40.61 |
| .....GGUGCAGACAAAUGUGAAX.                                          | 11    | 0.30  |
| .....GUGCAGACAAAUGUGAXXXXXXXXXXXXXX.                               | 23    | 0.63  |
| .....UGCAGACAAAUGUGAAXXXXXXXXXXXXXX.                               | 15    | 0.41  |
| .....CAGACAAAUGUGAAUUC AAGXX.                                      | 4     | 0.11  |
| .....AGACAAAUGUGAAUUC AAGAG.                                       | 2     |       |
| .....GACAAAUGUGAAUUC AAGAGXX.                                      | 11    |       |
| .....ACAAAUGUGAAUUC AAGAXXXXXXXXXXXXXX.                            | 20    |       |
| .....CAAAUGUGAAUUC AAGAXXXXXXXXXXXXXX.                             | 9     |       |
| .....AAAUGUGAAUUC AAGAXXXXXXXXXXXXXX.                              | 39    |       |
| .....AAUGUGAAUUC AAGAGXXXXXXXXXXXXX.                               | 18    |       |
| .....AUGUGAAUUC AAGAGAXXXXXX.                                      | 10    |       |
| .....UGUGAAUUC AAGAGAUXXX.                                         | 5     |       |
| .....GUGAAUUC AAGAGAUUX.                                           | 9     |       |
| .....UGAAUUC AAGAGAUUCXXX.                                         | 9     |       |
| .....GAAUUC AAGAGAUUC AXXXXXXXXXXXXX.                              | 32    |       |
| .....AAUUC AAGAGAUUC ACXXXXXXXXXXXXXX.                             | 121   |       |
| .....AUUC AAGAGAUUC ACAXXXXXXXXXXXXXXX.                            | 88    |       |
| .....UUUC AAGAGAUUC ACAXXXXXXXXXXXXXXX.                            | 94    |       |
| .....UCAAGAGAUUC ACAXXXXXXXXXXXXXXX.                               | 112   |       |
| .....CAAGAGAUUC ACAXXXXXXXXXXXXXXX.                                | 33    |       |
| .....AAGAGAUUC ACAXXXXXXXXXXXXXXX.                                 | 110   |       |
| .....AGAGAUUC ACAXXXXXXXXXXXXXXX.                                  | 57    |       |
| .....GAGAUUC ACAXXXXXXXXXXXXXXX.                                   | 116   |       |
| .....AGAUUC ACAXXXXXXXXXXXXXXX.                                    | 190   |       |
| .....GAUUC ACAXXXXXXXXXXXXXXX.                                     | 343   |       |
| .....AUUC ACAXXXXXXXXXXXXXXX.                                      | 204   |       |
| .....UUC ACAXXXXXXXXXXXXXXX.                                       | 4691  |       |
| .....UC ACAXXXXXXXXXXXXXXX.                                        | 1781  |       |
| .....CACAUUC ACAXXXXXXXXXXXXXXX.                                   | 218   |       |
| .....ACAUUC ACAXXXXXXXXXXXXXXX.                                    | 117   |       |
| .....CAUUC ACAXXXXXXXXXXXXXXX.                                     | 487   |       |
| .....AUUC ACAXXXXXXXXXXXXXXX.                                      | 443   |       |
| .....UUUC ACAXXXXXXXXXXXXXXX.                                      | 80    |       |
| .....UUC ACAXXXXXXXXXXXXXXX.                                       | 18    |       |

**#pSUPER Scr with original H1 promoter**

|                                                                  |       |       |
|------------------------------------------------------------------|-------|-------|
| ccacucuuucccGCGAAAGAUGAUAGCUAAuuc aagagaUUAGCUUAUCAUCUUUCGcuuuua | Reads |       |
| .....CCCGGAAAGAUGAUAXXXXXXXXXXXXXX.                              | 2831  | 17.10 |
| .....CCGCGAAAGAUGAUAXXXXXXXXXXXXXX.                              | 3303  | 19.96 |
| .....CGCGAAAGAUGAUAGXXXXXXXXXXXXXX.                              | 2686  | 16.23 |

|                                          |      |       |
|------------------------------------------|------|-------|
| .....GCGAAAGAUGAUAGCXXXXXXXXXXXXX.....   | 6853 | 41.40 |
| .....CGAAAGAUGAUAGCUXXXXXXX.....         | 501  | 3.03  |
| .....GAAAGAUGAUAGCUAXXXXXXXXXXX.....     | 152  | 0.92  |
| .....AAAGAUGAUAGCUAAXXXXXXXXXXX.....     | 101  | 0.61  |
| .....AAGAUGAUAGCUAAUXXXXXXXXXX.....      | 125  | 0.76  |
| .....AGAUGAUAGCUAAUXXXXXXXXXX.....       | 37   |       |
| .....GAUGAUAGCUAAUUCAXXXXXXX.....        | 20   |       |
| .....AUGAUAGCUAAUUCAXXXXXXXXXXX.....     | 36   |       |
| .....UGAUAGCUAAUUCAGAXXXXXXXXXXX.....    | 18   |       |
| .....GAUAAGCUAAUUCAGAXXXXXXXXXXX.....    | 69   |       |
| .....AUAAGCUAAUUCAGAXXXXXXXXXXX.....     | 78   |       |
| .....UAAGCUAAUUCAGAGAXXXXXXXXXXX.....    | 36   |       |
| .....AAGCUAAUUCAGAGAXXXXXXXXXXX.....     | 30   |       |
| .....AGCUAAUUCAGAGAU.....                | 3    |       |
| .....GCUAAUUCAGAGAUUXX.....              | 7    |       |
| .....CUAAUUCAGAGAUUAGXXXXXX.....         | 45   |       |
| .....UAAUUCAGAGAUUAGXXXXXX.....          | 67   |       |
| .....AAUUCAGAGAUUAGCXXXXXXXXXXXXX.....   | 110  |       |
| .....AUUCAGAGAUUAGCUXXXXXXXXXXXXXX.....  | 604  |       |
| .....UCAAGAGAUUAGCUXXXXXXXXXXXXX.....    | 239  |       |
| .....UCAAGAGAUUAGCUUXXXXXXXXXXXXX.....   | 249  |       |
| .....CAAGAGAUUAGCUUXXXXXXXXXXXXX.....    | 99   |       |
| .....AAGAGAUUAGCUUAXXXXXXXXXXXXXX.....   | 177  |       |
| .....AGAGAUUAGCUUAUCAXXXXXXXXXXXXXX..... | 310  |       |
| .....GAGAUUAGCUUAUCAXXXXXXXXXXXXX.....   | 171  |       |
| .....AGAUUAGCUUAUCAUCXXXXXXXXXXXXX.....  | 176  |       |
| .....GAUUAGCUUAUCAUCXXXXXXXXXXXXX.....   | 454  |       |
| .....AUUAGCUUAUCAUCUXXXXXXXXXXXXX.....   | 727  |       |
| .....UUAGCUUAUCAUCUUXXXXXXXXXXXXX.....   | 2336 |       |
| .....UAGCUUAUCAUCUUUCXXXXXXXXXXXXX.....  | 1942 |       |
| .....AGCUUAUCAUCUUUCGXXXXXX.....         | 180  |       |
| .....GCUUAUCAUCUUUCGCXXXXX.....          | 76   |       |
| .....CUUAUCAUCUUUCGCXXXXX.....           | 152  |       |
| .....UUAUCAUCUUUCGCUUXX.....             | 216  |       |
| .....UAUCAUCUUUCGCUUUX.....              | 65   |       |
| .....AUCAUCUUUCGCUUUU.....               | 4    |       |

**#pSUPER GFP with original H1 promoter**

|                                                                    | Reads |       |
|--------------------------------------------------------------------|-------|-------|
| ccacucuuucccGGCACAAGCUGGAGUACAAuucuaagagaUUGUACUCCAGCUUGUGCCuuuuua |       |       |
| .....CCCGGCACAAGCUGGAXXXXXXXXXXX.....                              | 2299  | 11.07 |
| .....CCGGCACAAGCUGGAGXXXXXXXXXX.....                               | 5592  | 26.93 |
| .....CGGCACAAGCUGGAGUXXXXXXXXXXXXX.....                            | 5162  | 24.86 |
| .....GGCACAAGCUGGAGUAXXXXXXXXXXXXXX.....                           | 7341  | 35.36 |
| .....GCACAAGCUGGAGUACXXXXXXXXXXXXX.....                            | 83    | 0.40  |
| .....CACAAGCUGGAGUACAXXXXXXXXXXXXXX.....                           | 177   | 0.85  |
| .....ACAAGCUGGAGUACAAXXXXXXXXXXXXXX.....                           | 108   | 0.52  |
| .....CAAGCUGGAGUACAAUXXXXXXXXXXXXX.....                            | 98    |       |
| .....AAGCUGGAGUACAAUXXXXXXXXXXXXX.....                             | 45    |       |
| .....AGCUGGAGUACAAUUC.....                                         | 7     |       |
| .....GCUUGGAGUACAAUUCAGXXXXX.....                                  | 7     |       |
| .....CUGGAGUACAAUUCAXXXXXXXXXXXXXX.....                            | 37    |       |
| .....UGGAGUACAAUUCAGXXXXXXXXXXXXX.....                             | 58    |       |
| .....GGAGUACAAUUCAGAXXXXXXXXXXXXXX.....                            | 35    |       |
| .....GAGUACAAUUCAGAGXXXXXXXXXXXXX.....                             | 132   |       |
| .....AGUACAAUUCAGAGAUXXXXXXXXXXXXX.....                            | 44    |       |
| .....GUACAAUUCAGAGAUXXX.....                                       | 23    |       |
| .....UACAAUUCAGAGAUUXXXXXXXXXXXXX.....                             | 43    |       |
| .....ACA AUUCAGAGAUUGXXXXX.....                                    | 16    |       |
| .....CAAUUCAGAGAUUGXXXXXXXXXXXXX.....                              | 128   |       |

|                                          |       |
|------------------------------------------|-------|
| .....AAUUCAAGAGAUUGUAXXXXXXXXXXXXXX..... | 592   |
| .....AUUCAAGAGAUUGUACXXXXXXXXXXXXX.....  | 512   |
| .....UUCAAGAGAUUGUACUXXXXXXXXXXXXX.....  | 526   |
| .....UCAAGAGAUUGUACUCXXXXXXXXXXXXX.....  | 547   |
| .....CAAGAGAUUGUACUCCXXXXXXXXXXXXX.....  | 162   |
| .....AAGAGAUUGUACUCCAXXXXXXXXXXXXXX..... | 249   |
| .....AGAGAUUGUACUCCAGXXXXXXXXXXXXX.....  | 393   |
| .....GAGAUUGUACUCCAGCXXXXXXXXXXXXX.....  | 330   |
| .....AGAUUGUACUCCAGCUXXXXXXXXXXXXX.....  | 421   |
| .....GAUUGUACUCCAGCUUXXXXXXXXXXXXX.....  | 1114  |
| .....AUUGUACUCCAGCUUGXXXXXXXXXXXXX.....  | 887   |
| .....UUGUACUCCAGCUUGUXXXXXXXXXXXXX.....  | 11680 |
| .....UGUACUCCAGCUUGUGXXXXXXXXXXXXX.....  | 19608 |
| .....GUACUCCAGCUUGUGCXXXXXXXXXXXXX.....  | 3015  |
| .....UACUCCAGCUUGUGCCXXXXXXXXXXXXX.....  | 720   |
| .....ACUCCAGCUUGUGCCUXXXXX.....          | 298   |
| .....CUCCAGCUUGUGCCUXXXXX.....           | 298   |
| .....UCCAGCUUGUGCCUUXXXXX.....           | 81    |
| .....CCAGCUUGUGCCUUUUXX.....             | 31    |
| .....CAGCUUGUGCCUUUUU.....               | 8     |

**#pSUPER macroH2A1 with original H1 promoter**

|                                                                  |       |       |
|------------------------------------------------------------------|-------|-------|
| ccacucuuucccGGGUGCAGACAAAUGUGAAuucaagagaUUCACAUUUGUCUGCACCCUUuua | Reads |       |
| .....UUCCCGGGUGCAGACAAAUGUG.....                                 | 3     | 0.02  |
| .....CCCGGGUGCAGACAAAXXXXXXXXXXXXX.....                          | 1261  | 6.63  |
| .....CCGGGUGCAGACAAAXXXXXXXXXXXXX.....                           | 6616  | 34.78 |
| .....CGGGUGCAGACAAAUGXXXXXXXXXXXXX.....                          | 4609  | 24.23 |
| .....GGGUGCAGACAAAUGUXXXXXXXXXXXXX.....                          | 6164  | 32.40 |
| .....GGUGCAGACAAAUGUGXXXXXXXXXXXXX.....                          | 68    | 0.36  |
| .....GUGCAGACAAAUGUGAXXXXXXXXXXXXXX.....                         | 142   | 0.75  |
| .....UGCAGACAAAUGUGAAXXXXXXXXXXXXXX.....                         | 89    | 0.47  |
| .....GCAGACAAAUGUGAAUXXXXXXXXXXXXX.....                          | 70    | 0.37  |
| .....CAGACAAAUGUGAAUXXXXXXXXXXXXX.....                           | 88    |       |
| .....AGACAAAUGUGAAUUCXXXXXXXXXXXXX.....                          | 53    |       |
| .....GACAAAUGUGAAUUCAXXXXXXXXXXXXXX.....                         | 71    |       |
| .....ACAAAUGUGAAUUCAGXXXXXXXXXXXXX.....                          | 138   |       |
| .....CAAAUGUGAAUUCAGAXXXXXXXXXXXXXX.....                         | 118   |       |
| .....AAAUGUGAAUUCAGAXXXXXXXXXXXXXX.....                          | 230   |       |
| .....AAUGUGAAUUCAGAGXXXXXXXXXXXXX.....                           | 104   |       |
| .....AUGUGAAUUCAGAGAXXXXXX.....                                  | 70    |       |
| .....UGUGAAUUCAGAGAUXXXXXXXXXXXXX.....                           | 53    |       |
| .....GUGAAUUCAGAGAUXX.....                                       | 80    |       |
| .....UGAAUUCAGAGAUUCXXXXX.....                                   | 43    |       |
| .....GAAUUCAGAGAUUCAXXXXXXXXXXXXXX.....                          | 160   |       |
| .....AAUUCAAGAGAUUCAXXXXXXXXXXXXXX.....                          | 1254  |       |
| .....AUUCAAGAGAUUCACAXXXXXXXXXXXXXX.....                         | 694   |       |
| .....UUCAAGAGAUUCACAUXXXXXXXXXXXXX.....                          | 939   |       |
| .....UCAAGAGAUUCACAUUXXXXXXXXXXXXX.....                          | 1100  |       |
| .....CAAGAGAUUCACAUUXXXXXXXXXXXXX.....                           | 319   |       |
| .....AAGAGAUUCACAUUUGXXXXXXXXXXXXX.....                          | 274   |       |
| .....AGAGAUUCACAUUUGUXXXXXXXXXXXXX.....                          | 586   |       |
| .....GAGAUUCACAUUUGUCXXXXXXXXXXXXX.....                          | 481   |       |
| .....AGAUUCACAUUUGUCUXXXXXXXXXXXXX.....                          | 708   |       |
| .....GAUUCACAUUUGUCUGXXXXXXXXXXXXX.....                          | 1643  |       |
| .....AUUCACAUUUGUCUGCXXXXXXXXXXXXX.....                          | 1082  |       |
| .....UUCACAUUUGUCUGCAXXXXXXXXXXXXXX.....                         | 11801 |       |
| .....UCACAUUUGUCUGCACXXXXXXXXXXXXX.....                          | 5458  |       |
| .....CACAUUUGUCUGCACCCXXXXXXXXXXXXX.....                         | 808   |       |
| .....ACAUUUGUCUGCACCCXXXXX.....                                  | 308   |       |

|                            |      |
|----------------------------|------|
| .....CAUUUGUCUGCACCCUXXXX. | 1349 |
| .....AUUUGUCUGCACCCUXXXX.  | 1525 |
| .....UUUGUCUGCACCCUUUXX.   | 244  |
| .....UUGUCUGCACCCUUUUX.    | 45   |
| .....UGUCUGCACCCUUUUU.     | 2    |

**#pri-miR-155**

|                                                                       |       |       |
|-----------------------------------------------------------------------|-------|-------|
| gcugUUA AUGCUAAUCGUGAUAGGGUUuuugccuccaacugaCUCCUACAUAUUAGCAUUAACAgugu | Reads |       |
| ...GUUA AUGCUAAUCGUGXXXXXXXXXX.                                       | 44    | 0.05  |
| ...UUA AUGCUAAUCGUGAXXXXXXXXXXX.                                      | 79934 | 95.98 |
| ...UAAUGCUAAUCGUGAUAGXXXXXXXXXX.                                      | 1551  | 1.86  |
| ...AAUGCUAAUCGUGAUAGGXXXXXXXXXX.                                      | 462   | 0.55  |
| ...AUGCUAAUCGUGAUAGGXXXXXXXXXX.                                       | 348   | 0.42  |
| ...UGC UAAUCGUGAUAGGXXXXXXXXXX.                                       | 184   | 0.22  |
| ...GCUAAUCGUGAUAGGGXXXXXXXXXX.                                        | 758   | 0.91  |
| ...CUAAUCGUGAUAGGGGXXX.                                               | 229   |       |
| ...UAAUCGUGAUAGGGGUXXXX.                                              | 257   |       |
| ...AAUCGUGAUAGGGGUUXXX.                                               | 200   |       |
| ...AUCGUGAUAGGGGUUUX.                                                 | 15    |       |
| ...UCGUGAUAGGGGUUUUX.                                                 | 16    |       |
| ...CGUGAUAGGGGUUUUXXXXXXXXXX.                                         | 18    |       |
| ...GAUAGGGGUUUUUGCCUCCAACUGACU.                                       | 2     |       |
| ...UAGGGGUUUUUGCCUCCAACUGACU.                                         | 2     |       |
| ...GGGGUUUUUGCCUCCAACUGAX.                                            | 4     |       |
| ...GGUUUUUGCCUCCAACUGXXXX.                                            | 8     |       |
| ...UUUUUGCCUCCAACUGACUCC.                                             | 2     |       |
| ...UUUUGCCUCCAACUGA.                                                  | 2     |       |
| ...CAACUGACUCCUACAUAU.                                                | 4     |       |
| ...AACUGACUCCUACAUAU.                                                 | 3     |       |
| ...ACUGACUCCUACAUAUXXXXXXXXXX.                                        | 25    |       |
| ...CUGACUCCUACAUAUAGCAUUAAXX.                                         | 25    |       |
| ...UGACUCCUACAUAUAGCAUUAAXX.                                          | 63    |       |
| ...GACUCCUACAUAUAGCAUUAACX.                                           | 38    |       |
| ...ACUCCUACAUAUAGCAUUAAXX.                                            | 53    |       |
| ...CUCCUACAUAUAGCAUUAAXX.                                             | 1506  |       |
| ...UCCUACAUAUAGCAUUAACXXXXX.                                          | 52    |       |
| ...CCUACAUAUAGCAUUAACXXXXX.                                           | 25    |       |
| ...CUACAUAUAGCAUUAACX.                                                | 29    |       |
| ...UACAUAUAGCAUUAACXXXX.                                              | 31    |       |
| ...ACAUAUAGCAUUAACX.                                                  | 34    |       |
| ...CAUAUAGCAUUAACA.                                                   | 9     |       |

**#pri-miR-223**

|                                                                        |       |  |
|------------------------------------------------------------------------|-------|--|
| cucCGUGUAUUUGACAAGCUGAGUUGgacacuccaugugguagagUGUCAGUUUGUCAAAUACCCCAagi | Reads |  |
| ..CCGUGUAUUUGACAAGCUGAG.                                               | 2     |  |
| ..CGUGUAUUUGACAAGCUGXXXXXXXXXX.                                        | 331   |  |
| ...GUGUAUUUGACAAGCUGAGUXXXXXXXXXX.                                     | 21    |  |
| ...UGUAUUUGACAAGCUGAGUUGGACACU.                                        | 12    |  |
| ...GUUUUGACAAGCUGAGUUGGXXXXXXXXXX.                                     | 47    |  |
| ...UAUUUGACAAGCUGAGUUGGACACU.                                          | 14    |  |
| ...AUUUUGACAAGCUGAGUXXXXXXXXXX.                                        | 53    |  |
| ...UUUGACAAGCUGAGUUGGAXXXX.                                            | 26    |  |
| ...UUGACAAGCUGAGUUGGXXXXXXXXXX.                                        | 22    |  |
| ...UGACAAGCUGAGUUGGACACU.                                              | 12    |  |
| ...GACAAGCUGAGUUGGACXXX.                                               | 4     |  |
| ...AAGCUGAGUUGGACACU.                                                  | 2     |  |
| ...UGGACACUCCAUGUGGUAGAGUGU.                                           | 2     |  |
| ...ACACUCCAUGUGGUAGAGUGUCAGUUU.                                        | 2     |  |

|                                       |       |       |
|---------------------------------------|-------|-------|
| .....UCCAUGUGGUAGAGUGUCAGXXXXXX.....  | 4     |       |
| .....AUGUGGUAGAGUGUCAGUU.....         | 2     |       |
| .....GUAGAGUGUCAGUUUGUCAAAUACCCC..... | 2     |       |
| .....AGAGUGUCAGUUUGUCAAAUACCCXXX..    | 13    | 0.02  |
| .....GAGUGUCAGUUUGUCAAAUACCCXXX..     | 22    | 0.03  |
| .....AGUGUCAGUUUGUCAAAUACCCXXX..      | 5     | 0.01  |
| .....GUGUCAGUUUGUCAAAUACCCXXX..       | 360   | 0.49  |
| .....UGUCAGUUUGUCAAAUXXXXXXXXX..      | 65591 | 88.78 |
| .....GUCAGUUUGUCAAAUACCCXXX..         | 6646  | 9.00  |
| .....UCAGUUUGUCAAAUACCCXXX..          | 276   | 0.37  |
| .....CAGUUUGUCAAAUACCCXXX..           | 469   | 0.63  |
| .....AGUUUGUCAAAUACCCXXX..            | 265   | 0.36  |
| .....GUUUGUCAAAUACCCXXX..             | 273   |       |
| .....UUUGUCAAAUACCCAXX..              | 608   |       |
