# Supplementary material for: Pol III Promoters to Express Small RNAs: Delineation of Transcription Initiation
Source: PubMed Central journal article supplement — Mol Ther Nucleic Acids. 2014 May 6;3(5):e161–. doi: 10.1038/mtna.2014.12 (PMC4040628; doi:10.1038/mtna.2014.12), 2014-05-06
Supplement: mtna201412x8.pdf [file mtna201412x8.pdf]

**Table S3**

|                   |                                                                                                                                                |
|-------------------|------------------------------------------------------------------------------------------------------------------------------------------------|
| pri-miR-30/NCCR5  | AACAGGTATATTGCTGTTGACAGTGAGCGACGGTGTAACCTGAGCTTGCTCGCGTGAAGCCACAGATGGCGA<br>GCAAGCTCCGTTTACACGGCTGCCTACTGCCTCGGACTTCAAGGGGCTTTTTTTCGA          |
| pri-miR-150/NCCR5 | AACCAGCGGGCGGCTCCTCTCCCCATGGCCCTGGGTGTAACCTGAGCTTGCTCGCCTGGGCTCAGAGGGAGCA<br>AGCTCCGTTTACACGCAGGGACCTGGGGACCCCGGCACCCGGCAGGCCTTTTTTTCGA        |
| pri-miR-30/WCCR5  | AACAGGTATATTGCTGTTGACAGTGAGCGACTGTAACCTGAGCTTGCTCTACTGTGAAGCCACAGATGGGTA<br>GAGCAAGCACAGTTTACCCTGCCTACTGCCTCGGACTTCAAGGGGCTTTTTTTCGA           |
| pri-miR-150/WCCR5 | AACCAGCGGGCGGCTCCTCTCCCCATGGCCCTGTGTAACCTGAGCTTGCTCTATGCTGGGCTCAGACCTAGAG<br>CAAGCACAGTTTACCCAGGGACCTGGGGACCCCGGCACCCGGCAGGCCTTTTTTTCGA        |
| sh1005            | AGAGCAAGCTCAGTTTACACCTTGTCCGACGGTGTAACCTGAGCTTGCTCTTTTTTTCGA                                                                                   |
| csHR-rluc-1       | AGGTGCTACACCTTGAAGCCCTGTGAAGCCACAGATGGGGGCTTCCAAGGTGTACGACCTTTTTTTCGA                                                                          |
| csHR-rluc-20      | AATGCGTTTTCGTTGCTCGGGCTGTGAAGCCACAGATGGGGCCGAGCAACGCAAACGCATTTTTTTCGA                                                                          |
| csHR-rluc-123     | AAATCACGGCGTTCTCGGGCTGTGTGAAGCCACAGATGGGACGCCGAGAACGCCGTGATTTTTTTCGA                                                                           |
| csHR-rluc-201     | AGATGCATCTAGCCACGGGCTGTGTGAAGCCACAGATGGGAGCCCGTAGATGCATCTTTTTTTCGA                                                                             |
| shR-miR-122       | ATGGAGTGTGACAATGGTGTGTGTCTAACTATCAAACACCATTGTACACTCCATTTTTTTCGA                                                                                |
| shR-miR-150 Wu3   | TGGTACAAGGGTTGGGAGATGCTGTGCCCTCAGACCTCTCCAACCCTTGTACCATTTTTTTCGA                                                                               |
| shR-CCR5chen5     | TGGTGTAAACTGAGCTTGCTCCTGTGAAGCCACAGATGGGGAGCAAGCTCAGTTTACACCTTTTTTTCGA                                                                         |
| sh1005-T          | TGAGCAAGCTCAGTTTACACCTTGTCCGACGGTGTAACCTGAGCTTGCTCTTTTTTTCGA                                                                                   |
| sh1005-G          | GGAGCAAGCTCAGTTTACACCTTGTCCGACGGTGTAACCTGAGCTTGCTCTTTTTTTCGA                                                                                   |
| sh1005-C          | CGAGCAAGCTCAGTTTACACCTTGTCCGACGGTGTAACCTGAGCTTGCTCTTTTTTTCGA                                                                                   |
| sh1005-TT         | TTGAGCAAGCTCAGTTTACACCTTGTCCGACGGTGTAACCTGAGCTTGCTCTTTTTTTCGA                                                                                  |
| sh1005-TTT        | TTTGAGCAAGCTCAGTTTACACCTTGTCCGACGGTGTAACCTGAGCTTGCTCTTTTTTTCGA                                                                                 |
| sh1005-TTTT       | TTTTGAGCAAGCTCAGTTTACACCTTGTCCGACGGTGTAACCTGAGCTTGCTCTTTTTTTCGA                                                                                |
| sh1005-TA         | TAGAGCAAGCTCAGTTTACACCTTGTCCGACGGTGTAACCTGAGCTTGCTCTTTTTTTCGA                                                                                  |
| sh1005-TTA        | TTAGAGCAAGCTCAGTTTACACCTTGTCCGACGGTGTAACCTGAGCTTGCTCTTTTTTTCGA                                                                                 |
| sh1005-TTTA       | TTTAGAGCAAGCTCAGTTTACACCTTGTCCGACGGTGTAACCTGAGCTTGCTCTTTTTTTCGA                                                                                |
| sh1005-TC         | TCGAGCAAGCTCAGTTTACACCTTGTCCGACGGTGTAACCTGAGCTTGCTCTTTTTTTCGA                                                                                  |
| sh1005-TTC        | TTCGAGCAAGCTCAGTTTACACCTTGTCCGACGGTGTAACCTGAGCTTGCTCTTTTTTTCGA                                                                                 |
| sh1005-CT         | CTGAGCAAGCTCAGTTTACACCTTGTCCGACGGTGTAACCTGAGCTTGCTCTTTTTTTCGA                                                                                  |
| sh1005-TG         | TGGAGCAAGCTCAGTTTACACCTTGTCCGACGGTGTAACCTGAGCTTGCTCTTTTTTTCGA                                                                                  |
| sh1005-CA         | CAGAGCAAGCTCAGTTTACACCTTGTCCGACGGTGTAACCTGAGCTTGCTCTTTTTTTCGA                                                                                  |
| sh1005-CG         | CGGAGCAAGCTCAGTTTACACCTTGTCCGACGGTGTAACCTGAGCTTGCTCTTTTTTTCGA                                                                                  |
| sh1005-CC         | CCGAGCAAGCTCAGTTTACACCTTGTCCGACGGTGTAACCTGAGCTTGCTCTTTTTTTCGA                                                                                  |
| mU6 TI 1          | TGATAATTTGTGGTAGTGGTTTTTTCGA                                                                                                                   |
| mU6 TI 2          | AGATAATTTGTGGTAGTGGTTTTTTCGA                                                                                                                   |
| mU6 TI 3          | CGATAATTTGTGGTAGTGGTTTTTTCGA                                                                                                                   |
| mU6 TI 4          | GGATAATTTGTGGTAGTGGTTTTTTCGA                                                                                                                   |
| mU6 TI 5          | TTGATAATTTGTGGTAGTGGTTTTTTCGA                                                                                                                  |
| mU6 TI 6          | TAGATAATTTGTGGTAGTGGTTTTTTCGA                                                                                                                  |
| mU6 TI 7          | TCGATAATTTGTGGTAGTGGTTTTTTCGA                                                                                                                  |
| mU6 TI 8          | TGGATAATTTGTGGTAGTGGTTTTTTCGA                                                                                                                  |
| mU6 TI 9          | TTTGATAATTTGTGGTAGTGGTTTTTTCGA                                                                                                                 |
| mU6 TI 10         | TTAGATAATTTGTGGTAGTGGTTTTTTCGA                                                                                                                 |
| mU6 TI 11         | TTTCGATAATTTGTGGTAGTGGTTTTTTCGA                                                                                                                |
| mU6 TI 12         | TTGGATAATTTGTGGTAGTGGTTTTTTCGA                                                                                                                 |
| mU6 TI 13         | TTTTGATAATTTGTGGTAGTGGTTTTTTCGA                                                                                                                |
| mU6 TI 14         | TTTAGATAATTTGTGGTAGTGGTTTTTTCGA                                                                                                                |
| mU6 TI 15         | TTTCGATAATTTGTGGTAGTGGTTTTTTCGA                                                                                                                |
| mU6 TI 16         | TTTGGATAATTTGTGGTAGTGGTTTTTTCGA                                                                                                                |
| shR-miR-451       | TTAAACCCTTACCATTACTGAGTTTAGTAATGGTAATGGTTCTTTTTTTCGA                                                                                           |
| shR-miR-31        | TAGGCAAGATGCTGGCATAGCTGTTGAACCTGGAACTGCTATGCCAACATATTGCCATTTTTTTCGA<br>GGACAGTAAGAAGGAAAACGTTTTAGAGCTAGAAATAGCAAGTTAAAATAAGGCTAGTCCGTTATCAACTT |
| gRNA 1            | GAAAAAGTGGCACCAGTCCGTGCTTTTTTTCGA<br>GGTGACAAGTGTGATCACTTGTTTTAGAGCTAGAAATAGCAAGTTAAAATAAGGCTAGTCCGTTATCAACTT                                  |
| gRNA 2            | GAAAAAGTGGCACCAGTCCGTGCTTTTTTTCGA<br>AAAGATAGTCATCTTGGGGCTTTTTAGAGCTAGAAATAGCAAGTTAAAATAAGGCTAGTCCGTTATCAACTT                                  |
| gRNA 3            | GAAAAAGTGGCACCAGTCCGTGCTTTTTTTCGA                                                                                                              |

gRNA 4

AAGTGTGATCACTTGGGTGGGTTTTAGAGCTAGAAATAGCAAGTTAAAATAAGGCTAGTCCGTTATCAACTT  
GAAAAAGTGGCACCGAGTCGGTGCTTTTTTCGA
